# Supplementary material for: Reversible, interrelated mRNA and miRNA expression patterns in the transcriptome of Rasless fibroblasts: functional and mechanistic implications
Source: PubMed Central journal article supplement (PMC4007593; doi:10.1186/1471-2164-14-731), 2013-10-25
Supplement: 1471-2164-14-731-S1.pdf [file 1471-2164-14-731-S1.pdf]

**Table S1. Differential gene expression in Rasless MEFs.**

List of 3091 differentially expressed probesets (2239 different genes) identified by means of SAM contrasts (FDR=0.01) comparing the microarray-generated transcriptional profile of 12-day 4OHT Rasless MEFs to that of control, untreated K-Ras<sup>lox</sup> MEFs. The differentially expressed loci are identified by *Affymetrix Probeset ID*, *Gene Name and Symbol*, and listed according to degree of overexpression or repression, quantitated by *d-value*. The \* symbols in the *R-fold* column denote independent validation of the transcriptional data obtained by means of Western immunoblot or FACS analysis. *d-value* is a parameter measuring the statistical distance separating the calculated expression value of each gene probeset from the null hypothesis (no-change). *q-value* is the estimated FDR at the largest p-value for which the probe set would be statistically significant. *R-fold* is a measure of the fold change of a probeset in the collection of microarrays provided by the SAM algorithm. Values in red denote overexpression. Values in green denote transcriptional repression. The column *Expression reversed by* indicates whether or not the exogenous expression of activated BRAF or MEK1 is able to reverse the transcriptional direction shown by that particular probeset under the Rasless status (BRAF: Reversed expression profile resulting from exogenous expression of activated BRAF at FDR=0.1; MEK: Reversed expression from exogenous expression of activated MEK1 at FDR=0.1; n.r.= not rescued, same transcriptional direction in Rasless and BRAF- or MEK1-rescued MEFs. Empty space: no data available in BRAF- or MEK1-rescued cells for this probeset at FDR=0.1.

| <i>Probeset ID</i> | <i>Symbol</i> | <i>Gene Name</i>                                                                    | <i>d-value</i> | <i>q-value</i> | <i>R-fold</i> | <i>Expression reversed by</i> |
|--------------------|---------------|-------------------------------------------------------------------------------------|----------------|----------------|---------------|-------------------------------|
| 1444026_at         | AI593442      | expressed sequence AI593442                                                         | 17.25          | 0.00           | 5.88          | BRAF                          |
| 1449815_a_at       | Ssbp2         | single-stranded DNA binding protein 2                                               | 15.58          | 0.00           | 2.65          | BRAF; MEK                     |
| 1435950_at         | Hr            | hairless                                                                            | 14.94          | 0.00           | 3.20          | BRAF; MEK                     |
| 1436978_at         | Wnt9a         | wingless-type MMTV integration site 9A                                              | 14.33          | 0.00           | 4.05          | BRAF; MEK                     |
| 1438266_at         | Adamts15      | ADAMTS-like 5                                                                       | 14.25          | 0.00           | 4.88          | BRAF; MEK                     |
| 1420986_s_at       | Kif3b         | kinesin family member 3B                                                            | 13.01          | 0.00           | 1.67          | BRAF; MEK                     |
| 1449082_at         | Mfap5         | microfibrillar associated protein 5                                                 | 12.54          | 0.00           | 15.90         | BRAF; MEK                     |
| 1420562_at         | Slurp1        | secreted Ly6/Plaur domain containing 1                                              | 12.47          | 0.00           | 12.27         | BRAF; MEK                     |
| 1426672_at         | Tmem16k       | transmembrane protein 16K                                                           | 11.63          | 0.00           | 1.66          | ; MEK                         |
| 1434052_at         | AI593442      | expressed sequence AI593442                                                         | 11.30          | 0.00           | 3.41          | BRAF                          |
| 1417304_at         | Chrd          | chordin                                                                             | 11.17          | 0.00           | 1.56          | ; MEK                         |
| 1418962_at         | Necap2        | NECAP endocytosis associated 2                                                      | 11.03          | 0.00           | 1.73          | BRAF; MEK                     |
| 1460561_x_at       | Sepw1         | selenoprotein W. muscle 1                                                           | 10.95          | 0.00           | 2.76          | BRAF                          |
| 1435738_x_at       | Serf2         | small EDRK-rich factor 2                                                            | 10.93          | 0.00           | 1.35          | BRAF; MEK                     |
| 1455236_x_at       | Serf2         | small EDRK-rich factor 2                                                            | 10.92          | 0.00           | 1.36          | BRAF; MEK                     |
| 1432558_a_at       | Mal           | myelin and lymphocyte protein. T-cell differentiation protein                       | 10.89          | 0.00           | 3.66          | BRAF; MEK                     |
| 1426811_at         | Ppp2r5b       | protein phosphatase 2. regulatory subunit B (B56). beta isoform                     | 10.88          | 0.00           | 2.70          | BRAF; MEK                     |
| 1453419_at         | Mras          | muscle and microspikes RAS                                                          | 10.88          | 0.00           | 1.82          | BRAF; MEK                     |
| 1418195_at         | Galnt10       | UDP-N-acetyl-alpha-D-galactosamine:polypeptide N-acetylgalactosaminyltransferase 10 | 10.88          | 0.00           | 2.30          | BRAF; MEK                     |
| 1419619_at         | Krt80         | keratin 80                                                                          | 10.69          | 0.00           | 2.83          |                               |
| 1417439_at         | Cd248         | CD248 antigen. endosialin                                                           | 10.50          | 0.00           | 2.07          | BRAF; n.r.                    |
| 1454881_s_at       | Upk3b         | uroplakin 3B                                                                        | 10.40          | 0.00           | 5.81          | BRAF; MEK                     |
| 1434237_at         | Upk3b         | uroplakin 3B                                                                        | 10.28          | 0.00           | 3.41          | BRAF; MEK                     |
| 1417034_at         | Trappc6a      | trafficking protein particle complex 6A                                             | 10.19          | 0.00           | 1.61          | ; MEK                         |
| 1449711_at         | Atp6v1e1      | ATPase. H+ transporting. lysosomal V1 subunit E1                                    | 10.16          | 0.00           | 1.49          | BRAF; MEK                     |
| 1417275_at         | Mal           | myelin and lymphocyte protein. T-cell differentiation protein                       | 10.14          | 0.00           | 21.04         | BRAF; MEK                     |
| 1417133_at         | Pmp22         | peripheral myelin protein 22                                                        | 10.12          | 0.00           | 5.06          | BRAF; MEK                     |
| 1459871_x_at       | March2        | membrane-associated ring finger (C3HC4) 2                                           | 10.08          | 0.00           | 2.01          | BRAF; MEK                     |
| 1416411_at         | Gstm2         | glutathione S-transferase. mu 2                                                     | 9.95           | 0.00           | 3.88          | BRAF; MEK                     |
| 1416017_at         | Copg          | coatamer protein complex. subunit gamma                                             | 9.91           | 0.00           | 1.53          |                               |
| 1450512_at         | Ntn4          | netrin 4                                                                            | 9.90           | 0.00           | 4.04          | BRAF; MEK                     |

| <b>Probeset ID</b> | <b>Symbol</b>     | <b>Gene Name</b>                                                                                                                      | <b>d-value</b> | <b>q-value</b> | <b>R-fold</b> | <b>Expression reversed by</b> |
|--------------------|-------------------|---------------------------------------------------------------------------------------------------------------------------------------|----------------|----------------|---------------|-------------------------------|
| 1424365_at         | 1810037I17Rik     | RIKEN cDNA 1810037I17 gene                                                                                                            | 9.89           | 0.00           | 1.70          | BRAF; MEK                     |
| 1418454_at         | Mfap5             | microfibrillar associated protein 5                                                                                                   | 9.76           | 0.00           | 21.53         | BRAF; MEK                     |
| 1418671_at         | Capn5             | calpain 5                                                                                                                             | 9.70           | 0.00           | 2.06          |                               |
| 1415677_at         | Dhrs1             | dehydrogenase/reductase (SDR family) member 1                                                                                         | 9.68           | 0.00           | 1.45          | BRAF; MEK                     |
| 1452173_at         | Hadha             | hydroxyacyl-Coenzyme A dehydrogenase/3-ketoacyl-Coenzyme A thiolase/enoyl-Coenzyme A hydratase (trifunctional protein). alpha subunit | 9.62           | 0.00           | 1.37          |                               |
| 1428750_at         | Cdc42ep2          | CDC42 effector protein (Rho GTPase binding) 2                                                                                         | 9.62           | 0.00           | 3.55          | BRAF                          |
| 1430421_a_at       | Tmem205           | transmembrane protein 205                                                                                                             | 9.50           | 0.00           | 2.47          | BRAF; MEK                     |
| 1424057_at         | Gdap2             | ganglioside-induced differentiation-associated-protein 2                                                                              | 9.48           | 0.00           | 1.50          | BRAF; MEK                     |
| 1451207_at         | Cbara1            | calcium binding atopy-related autoantigen 1                                                                                           | 9.45           | 0.00           | 1.69          |                               |
| 1423047_at         | Tollip            | toll interacting protein                                                                                                              | 9.26           | 0.00           | 1.72          | BRAF; MEK                     |
| 1422347_at         | Npy6r             | neuropeptide Y receptor Y6                                                                                                            | 9.25           | 0.00           | 9.01          | BRAF; MEK                     |
| 1433786_x_at       | Serf2             | small EDRK-rich factor 2                                                                                                              | 9.20           | 0.00           | 1.34          | BRAF; MEK                     |
| 1448429_at         | Gyg               | glycogenin                                                                                                                            | 9.14           | 0.00           | 1.91          | BRAF; MEK                     |
| 1437893_at         | Plb1              | phospholipase B1                                                                                                                      | 9.11           | 0.00           | 4.83          | BRAF; MEK                     |
| 1431359_a_at       | 1110007C09Rik     | RIKEN cDNA 1110007C09 gene                                                                                                            | 9.08           | 0.00           | 1.80          | BRAF; MEK                     |
| 1428717_at         | Scrn1             | secernin 1                                                                                                                            | 9.05           | 0.00           | 3.52          | BRAF; MEK                     |
| 1417604_at         | Camk1             | calcium/calmodulin-dependent protein kinase I                                                                                         | 9.05           | 0.00           | 2.66          | BRAF; MEK                     |
| 1453008_at         | 2300002D11Rik     | RIKEN cDNA 2300002D11 gene                                                                                                            | 9.03           | 0.00           | 5.06          | BRAF; MEK                     |
| 1423239_at         | Impdh1            | inosine 5'-phosphate dehydrogenase 1                                                                                                  | 9.01           | 0.00           | 2.46          | BRAF; MEK                     |
| 1428718_at         | Scrn1             | secernin 1                                                                                                                            | 9.00           | 0.00           | 3.96          | BRAF; MEK                     |
| 1449259_at         | Rab3d             | RAB3D. member RAS oncogene family                                                                                                     | 9.00           | 0.00           | 1.87          | BRAF; MEK                     |
| 1449712_s_at       | Atp6v1e1          | ATPase. H+ transporting. lysosomal V1 subunit E1                                                                                      | 8.92           | 0.00           | 1.48          | BRAF; MEK                     |
| 1459807_x_at       | 4933406E20Rik     | RIKEN cDNA 4933406E20 gene                                                                                                            | 8.85           | 0.00           | 1.76          | BRAF                          |
| 1432158_a_at       | Trappc2           | trafficking protein particle complex 2                                                                                                | 8.81           | 0.00           | 1.75          | BRAF; MEK                     |
| 1435716_x_at       | Snrpn             | small nuclear ribonucleoprotein N                                                                                                     | 8.80           | 0.00           | 1.63          | BRAF; MEK                     |
| 1438086_at         | Npy6r             | neuropeptide Y receptor Y6                                                                                                            | 8.77           | 0.00           | 17.26         | BRAF; MEK                     |
| 1416513_at         | Lamb2             | laminin. beta 2                                                                                                                       | 8.76           | 0.00           | 2.82          | BRAF; MEK                     |
| 1429212_a_at       | Lrrc51            | leucine rich repeat containing 51                                                                                                     | 8.76           | 0.00           | 1.77          | BRAF; MEK                     |
| 1433916_at         | Vamp3             | vesicle-associated membrane protein 3                                                                                                 | 8.74           | 0.00           | 1.44          | BRAF; MEK                     |
| 1429119_at         | lah1              | isoamyl acetate-hydrolyzing esterase 1 homolog (S. cerevisiae)                                                                        | 8.73           | 0.00           | 2.62          | BRAF; MEK                     |
| 1417842_at         | Cam1              | calcium modulating ligand                                                                                                             | 8.67           | 0.00           | 1.53          | BRAF; MEK                     |
| 1436865_at         | Slc26a11          | solute carrier family 26. member 11                                                                                                   | 8.66           | 0.00           | 1.44          | BRAF; MEK                     |
| 1439728_at         | D330027H18Rik     | RIKEN cDNA D330027H18 gene                                                                                                            | 8.63           | 0.00           | 4.50          | BRAF                          |
| 1424762_at         | C1qtnf5           | C1q and tumor necrosis factor related protein 5                                                                                       | 8.57           | 0.00           | 2.30          | BRAF; MEK                     |
| 1421217_a_at       | Lgals9            | lectin. galactose binding. soluble 9                                                                                                  | 8.56           | 0.00           | 3.44          | BRAF; MEK                     |
| 1442076_at         | Cobl              | cordon-bleu                                                                                                                           | 8.52           | 0.00           | 2.55          | BRAF; MEK                     |
| 1423856_at         | Rpl17             | ribosomal protein L17                                                                                                                 | 8.51           | 0.00           | 4.37          |                               |
| 1416635_at         | Smpdl3a           | sphingomyelin phosphodiesterase. acid-like 3A                                                                                         | 8.39           | 0.00           | 7.85          | BRAF; MEK                     |
| 1418891_a_at       | Rab3d             | RAB3D. member RAS oncogene family                                                                                                     | 8.37           | 0.00           | 2.76          | BRAF; MEK                     |
| 1422157_a_at       | Itgb1bp1          | integrin beta 1 binding protein 1                                                                                                     | 8.31           | 0.00           | 1.69          | BRAF; MEK                     |
| 1433449_at         | Snx32             | sorting nexin 32                                                                                                                      | 8.29           | 0.00           | 1.90          | BRAF; MEK                     |
| 1435510_at         | Ppm1h             | protein phosphatase 1H (PP2C domain containing)                                                                                       | 8.27           | 0.00           | 1.75          | BRAF; MEK                     |
| 1433891_at         | Lgr4              | leucine-rich repeat-containing G protein-coupled receptor 4                                                                           | 8.26           | 0.00           | 3.12          | BRAF                          |
| 1451496_at         | Mtss1             | metastasis suppressor 1                                                                                                               | 8.16           | 0.00           | 1.51          | BRAF; MEK                     |
| 1433566_at         | Rasl10b           | RAS-like. family 10. member B                                                                                                         | 8.16           | 0.00           | 2.14          | BRAF; MEK                     |
| 1439500_at         | Scrn1             | secernin 1                                                                                                                            | 8.14           | 0.00           | 4.75          | BRAF; MEK                     |
| 1434558_at         | Wdr47             | WD repeat domain 47                                                                                                                   | 8.13           | 0.00           | 1.79          | BRAF; MEK                     |
| 1437498_at         | ENSMUSG0000055440 | predicted gene. ENSMUSG00000055440                                                                                                    | 8.12           | 0.00           | 1.71          | BRAF; MEK                     |
| 1418714_at         | Dusp8             | dual specificity phosphatase 8                                                                                                        | 8.09           | 0.00           | 2.38          | BRAF; MEK                     |
| 1450409_a_at       | 4930570C03Rik     | RIKEN cDNA 4930570C03 gene                                                                                                            | 8.08           | 0.00           | 2.53          | BRAF; MEK                     |
| 1422596_at         | Nkain4            | Na+/K+ transporting ATPase interacting 4                                                                                              | 8.07           | 0.00           | 11.90         | BRAF; MEK                     |
| 1418595_at         | S3-12             | plasma membrane associated protein. S3-12                                                                                             | 8.06           | 0.00           | 2.86          | BRAF; MEK                     |
| 1416321_s_at       | Prelp             | proline arginine-rich end leucine-rich repeat                                                                                         | 8.05           | 0.00           | 41.78         | BRAF; MEK                     |
| 1424256_at         | Rdh12             | retinol dehydrogenase 12                                                                                                              | 8.02           | 0.00           | 1.47          |                               |

| <b>Probeset ID</b> | <b>Symbol</b> | <b>Gene Name</b>                                                                       | <b>d-value</b> | <b>q-value</b> | <b>R-fold</b> | <b>Expression reversed by</b> |
|--------------------|---------------|----------------------------------------------------------------------------------------|----------------|----------------|---------------|-------------------------------|
| 1427864_at         | Hist1h3d      | histone cluster 1. H3d                                                                 | 8.00           | 0.00           | 1.88          | BRAF; MEK                     |
| 1451978_at         | Loxl1         | lysyl oxidase-like 1                                                                   | 7.98           | 0.00           | 1.60          | BRAF; MEK                     |
| 1416727_a_at       | Cyb5          | cytochrome b-5                                                                         | 7.97           | 0.00           | 1.78          | BRAF; MEK                     |
| 1418586_at         | Adcy9         | adenylate cyclase 9                                                                    | 7.97           | 0.00           | 1.97          | BRAF                          |
| 1418702_a_at       | 2810428115Rik | RIKEN cDNA 2810428115 gene                                                             | 7.95           | 0.00           | 3.56          | BRAF; MEK                     |
| 1451217_a_at       | Immp11        | IMP1 inner mitochondrial membrane peptidase-like (S. cerevisiae)                       | 7.95           | 0.00           | 1.57          | BRAF; MEK                     |
| 1434387_at         | Iltfg3        | integrin alpha FG-GAP repeat containing 3                                              | 7.94           | 0.00           | 1.91          | BRAF                          |
| 1417185_at         | Ly6a          | lymphocyte antigen 6 complex. locus A                                                  | 7.90           | 0.00           | 10.26         | ; n.r.                        |
| 1418890_a_at       | Rab3d         | RAB3D. member RAS oncogene family                                                      | 7.87           | 0.00           | 2.67          | BRAF; MEK                     |
| 1419979_s_at       | Creb3         | cAMP responsive element binding protein 3                                              | 7.86           | 0.00           | 1.98          | BRAF; MEK                     |
| 1416521_at         | Sepw1         | selenoprotein W. muscle 1                                                              | 7.84           | 0.00           | 2.74          | BRAF; MEK                     |
| 1422780_at         | Pxmp4         | peroxisomal membrane protein 4                                                         | 7.83           | 0.00           | 2.02          | ; MEK                         |
| 1421045_at         | Mrc2          | mannose receptor. C type 2                                                             | 7.82           | 0.00           | 3.15          | BRAF                          |
| 1423507_a_at       | Sirt2         | sirtuin 2 (silent mating type information regulation 2. homolog) 2 (S. cerevisiae)     | 7.82           | 0.00           | 1.77          | BRAF; MEK                     |
| 1452745_at         | Trappc9       | trafficking protein particle complex 9                                                 | 7.81           | 0.00           | 1.52          | ; n.r.                        |
| 1439256_x_at       | Gpr137b-ps    | G protein-coupled receptor 137B. pseudogene                                            | 7.79           | 0.00           | 1.76          | BRAF; MEK                     |
| 1418089_at         | Stx8          | syntaxin 8                                                                             | 7.78           | 0.00           | 1.55          | BRAF; MEK                     |
| 1429348_at         | Sema3c        | sema domain. immunoglobulin domain (Ig). short basic domain. secreted. (semaphorin) 3C | 7.77           | 0.00           | 6.82          | BRAF; MEK                     |
| 1433979_at         | Rbms2         | RNA binding motif. single stranded interacting protein 2                               | 7.73           | 0.00           | 1.51          | BRAF; MEK                     |
| 1454898_s_at       | lah1          | isoamyl acetate-hydrolyzing esterase 1 homolog (S. cerevisiae)                         | 7.68           | 0.00           | 2.66          | BRAF; MEK                     |
| 1427773_a_at       | Rabac1        | Rab acceptor 1 (prenylated)                                                            | 7.68           | 0.00           | 1.75          | BRAF; MEK                     |
| 1423365_at         | Cacna1g       | calcium channel. voltage-dependent. T type. alpha 1G subunit                           | 7.67           | 0.00           | 2.11          | BRAF; MEK                     |
| 1438550_x_at       | Srr           | serine racemase                                                                        | 7.67           | 0.00           | 1.54          | BRAF; MEK                     |
| 1435446_a_at       | Chpt1         | choline phosphotransferase 1                                                           | 7.66           | 0.00           | 1.66          | BRAF; MEK                     |
| 1450435_at         | L1cam         | L1 cell adhesion molecule                                                              | 7.66           | 0.00           | 3.91          |                               |
| 1430539_at         | Mxra7         | matrix-remodelling associated 7                                                        | 7.61           | 0.00           | 2.13          | BRAF; MEK                     |
| 1416328_a_at       | Atp6v0e       | ATPase. H+ transporting. lysosomal V0 subunit E                                        | 7.58           | 0.00           | 1.48          | BRAF; MEK                     |
| 1450881_s_at       | Gpr137b-ps    | G protein-coupled receptor 137B. pseudogene                                            | 7.56           | 0.00           | 2.05          | ; MEK                         |
| 1424826_s_at       | Mtss1         | metastasis suppressor 1                                                                | 7.55           | 0.00           | 6.33          | BRAF; MEK                     |
| 1425125_at         | Oit3          | oncoprotein induced transcript 3                                                       | 7.52           | 0.00           | 1.50          | BRAF; MEK                     |
| 1456026_at         | Nhlrc3        | NHL repeat containing 3                                                                | 7.52           | 0.00           | 2.14          | BRAF; MEK                     |
| 1437900_at         | 4930523C07Rik | RIKEN cDNA 4930523C07 gene                                                             | 7.51           | 0.00           | 1.99          | BRAF                          |
| 1443502_at         | Birc7         | baculoviral IAP repeat-containing 7 (livin)                                            | 7.51           | 0.00           | 1.66          | BRAF; MEK                     |
| 1449024_a_at       | Hexa          | hexosaminidase A                                                                       | 7.48           | 0.00           | 1.69          | BRAF; MEK                     |
| 1417565_at         | Abhd5         | abhydrolase domain containing 5                                                        | 7.45           | 0.00           | 2.22          | BRAF; MEK                     |
| 1455768_at         | Npc2          | Niemann Pick type C2                                                                   | 7.45           | 0.00           | 2.18          | BRAF                          |
| 1435055_a_at       | Tom1          | target of myb1 homolog (chicken)                                                       | 7.43           | 0.00           | 2.04          | BRAF; MEK                     |
| 1448744_at         | Galns         | galactosamine (N-acetyl)-6-sulfate sulfatase                                           | 7.41           | 0.00           | 2.16          | BRAF; MEK                     |
| 1425439_a_at       | Slc41a3       | solute carrier family 41. member 3                                                     | 7.41           | 0.00           | 1.66          | BRAF; MEK                     |
| 1451932_a_at       | Adamtsl4      | ADAMTS-like 4                                                                          | 7.41           | 0.00           | 3.62          | BRAF; MEK                     |
| 1439794_at         | NA            | NA                                                                                     | 7.40           | 0.00           | 9.45          | BRAF; MEK                     |
| 1436870_s_at       | Afap1l2       | actin filament associated protein 1-like 2                                             | 7.39           | 0.00           | 5.71          | ; n.r.                        |
| 1419668_at         | Sgcb          | sarcoglycan. beta (dystrophin-associated glycoprotein)                                 | 7.39           | 0.00           | 2.15          | BRAF; MEK                     |
| 1423794_at         | D2Erd391e     | DNA segment. Chr 2. ERATO Doi 391. expressed                                           | 7.37           | 0.00           | 1.33          | BRAF                          |
| 1456805_a_at       | LOC100043911  | hypothetical protein LOC100043911                                                      | 7.36           | 0.00           | 1.54          | BRAF; MEK                     |
| 1435785_at         | Ehd2          | EH-domain containing 2                                                                 | 7.35           | 0.00           | 2.15          | BRAF; MEK                     |
| 1452646_at         | Trp53inp2     | transformation related protein 53 inducible nuclear protein 2                          | 7.34           | 0.00           | 1.93          | BRAF; MEK                     |
| 1416330_at         | Cd81          | CD81 antigen                                                                           | 7.33           | 0.00           | 1.30          | BRAF; MEK                     |
| 1417605_s_at       | Camk1         | calcium/calmodulin-dependent protein kinase I                                          | 7.32           | 0.00           | 2.66          | BRAF; MEK                     |
| 1454830_at         | Fbn2          | fibrillin 2                                                                            | 7.30           | 0.00           | 13.15         | BRAF; MEK                     |
| 1440617_at         | Cpa6          | carboxypeptidase A6                                                                    | 7.26           | 0.00           | 6.11          | BRAF; MEK                     |
| 1435264_at         | Emilin2       | elastin microfibril interfacier 2                                                      | 7.26           | 0.00           | 2.39          | n.r. ; n.r.                   |
| 1419015_at         | Wisp2         | WNT1 inducible signaling pathway protein 2                                             | 7.25           | 0.00           | 26.74         | BRAF; MEK                     |
| 1459522_s_at       | Gyg           | glycogenin                                                                             | 7.24           | 0.00           | 1.80          | BRAF; MEK                     |
| 1419315_at         | Slamf9        | SLAM family member 9                                                                   | 7.24           | 0.00           | 1.92          | BRAF; MEK                     |

| <b>Probeset ID</b> | <b>Symbol</b> | <b>Gene Name</b>                                                         | <b>d-value</b> | <b>q-value</b> | <b>R-fold</b> | <b>Expression reversed by</b> |
|--------------------|---------------|--------------------------------------------------------------------------|----------------|----------------|---------------|-------------------------------|
| 1452879_at         | Synpo2        | synaptopodin 2                                                           | 7.23           | 0.00           | 2.57          | BRAF; MEK                     |
| 1452929_at         | Clip1         | CAP-GLY domain containing linker protein 1                               | 7.22           | 0.00           | 1.56          | BRAF; MEK                     |
| 1444086_at         | E030049G20Rik | RIKEN cDNA E030049G20 gene                                               | 7.22           | 0.00           | 1.66          | BRAF; MEK                     |
| 1416360_at         | Snx18         | sorting nexin 18                                                         | 7.22           | 0.00           | 2.29          | BRAF; MEK                     |
| 1416567_s_at       | Atp5e         | ATP synthase. H+ transporting. mitochondrial F1 complex. epsilon subunit | 7.20           | 0.00           | 1.48          | BRAF                          |
| 1416359_at         | Snx18         | sorting nexin 18                                                         | 7.18           | 0.00           | 2.15          | BRAF; MEK                     |
| 1439409_x_at       | Tyrp1         | tyrosinase-related protein 1                                             | 7.16           | 0.00           | 1.42          | BRAF; MEK                     |
| 1417384_at         | Entpd5        | ectonucleoside triphosphate diphosphohydrolase 5                         | 7.15           | 0.00           | 2.36          | BRAF; MEK                     |
| 1420540_a_at       | Rit1          | Ras-like without CAAX 1                                                  | 7.14           | 0.00           | 1.68          | BRAF; MEK                     |
| 1427943_at         | Acyp2         | acylphosphatase 2. muscle type                                           | 7.12           | 0.00           | 3.30          | BRAF; MEK                     |
| 1422977_at         | Gp1bb         | glycoprotein lb. beta polypeptide                                        | 7.12           | 0.00           | 2.87          | BRAF; MEK                     |
| 1428597_at         | Tbc1d9b       | TBC1 domain family. member 9B                                            | 7.12           | 0.00           | 1.43          | ; MEK                         |
| 1452330_a_at       | Mxra8         | matrix-remodelling associated 8                                          | 7.11           | 0.00           | 1.85          |                               |
| 1435351_at         | 2310026E23Rik | RIKEN cDNA 2310026E23 gene                                               | 7.09           | 0.00           | 6.19          |                               |
| 1424408_at         | Lims2         | LIM and senescent cell antigen like domains 2                            | 7.07           | 0.00           | 2.12          | BRAF; MEK                     |
| 1439255_s_at       | LOC100044979  | similar to Gpr137b protein                                               | 7.07           | 0.00           | 1.80          | BRAF; MEK                     |
| 1423298_at         | Add3          | adducin 3 (gamma)                                                        | 7.06           | 0.00           | 1.86          | ; n.r.                        |
| 1460702_at         | Triap1        | TP53 regulated inhibitor of apoptosis 1                                  | 7.02           | 0.00           | 1.61          | BRAF; MEK                     |
| 1418927_a_at       | Habp4         | hyaluronic acid binding protein 4                                        | 7.02           | 0.00           | 1.79          | BRAF; MEK                     |
| 1432260_at         | Gpr39         | G protein-coupled receptor 39                                            | 7.02           | 0.00           | 2.83          | BRAF; MEK                     |
| 1427287_s_at       | Itpr2         | inositol 1.4.5-triphosphate receptor 2                                   | 7.01           | 0.00           | 2.76          | ; MEK                         |
| 1416322_at         | Prelp         | proline arginine-rich end leucine-rich repeat                            | 7.01           | 0.00           | 10.07         | BRAF; MEK                     |
| 1418895_at         | Skap2         | src family associated phosphoprotein 2                                   | 7.01           | 0.00           | 1.63          | ; MEK                         |
| 1438011_at         | Pcyt1a        | phosphate cytidyltransferase 1. choline. alpha isoform                   | 7.00           | 0.00           | 1.65          | BRAF; MEK                     |
| 1455566_s_at       | 2810022L02Rik | RIKEN cDNA 2810022L02 gene                                               | 6.99           | 0.00           | 2.21          | BRAF; MEK                     |
| 1436520_at         | Ahnak2        | AHNAK nucleoprotein 2                                                    | 6.99           | 0.00           | 2.60          |                               |
| 1423939_a_at       | Yif1a         | Yip1 interacting factor homolog A (S. cerevisiae)                        | 6.98           | 0.00           | 1.63          | BRAF; MEK                     |
| 1452445_at         | Slc41a2       | solute carrier family 41. member 2                                       | 6.97           | 0.00           | 2.12          | BRAF; MEK                     |
| 1428891_at         | 9130213B05Rik | RIKEN cDNA 9130213B05 gene                                               | 6.96           | 0.00           | 4.97          | BRAF; MEK                     |
| 1434930_at         | Tpcn1         | two pore channel 1                                                       | 6.95           | 0.00           | 2.34          |                               |
| 1417073_a_at       | Qk            | quaking                                                                  | 6.94           | 0.00           | 2.14          | BRAF                          |
| 1434823_x_at       | Myeov2        | myeloma overexpressed 2                                                  | 6.94           | 0.00           | 1.65          | BRAF; MEK                     |
| 1416924_at         | Bri3          | brain protein l3                                                         | 6.93           | 0.00           | 1.77          | BRAF; MEK                     |
| 1439593_s_at       | LOC100043911  | hypothetical protein LOC100043911                                        | 6.93           | 0.00           | 1.40          | BRAF; MEK                     |
| 1428864_at         | 5530400B01Rik | RIKEN cDNA 5530400B01 gene                                               | 6.92           | 0.00           | 2.26          | BRAF; MEK                     |
| 1431597_a_at       | Nrip3         | nuclear receptor interacting protein 3                                   | 6.92           | 0.00           | 2.83          | BRAF; MEK                     |
| 1449331_a_at       | Rapsn         | receptor-associated protein of the synapse                               | 6.90           | 0.00           | 1.93          | BRAF; MEK                     |
| 1448390_a_at       | Dhrs3         | dehydrogenase/reductase (SDR family) member 3                            | 6.90           | 0.00           | 5.47          | BRAF; MEK                     |
| 1431198_x_at       | 9430038I01Rik | RIKEN cDNA 9430038I01 gene                                               | 6.88           | 0.00           | 1.31          | ; MEK                         |
| 1455652_at         | Kif3a         | kinesin family member 3A                                                 | 6.87           | 0.00           | 1.84          | BRAF; MEK                     |
| 1438026_at         | Zfp560        | zinc finger protein 560                                                  | 6.85           | 0.00           | 1.79          | BRAF; MEK                     |
| 1453278_a_at       | Clip4         | CAP-GLY domain containing linker protein family. member 4                | 6.85           | 0.00           | 1.35          |                               |
| 1423940_at         | Yif1a         | Yip1 interacting factor homolog A (S. cerevisiae)                        | 6.84           | 0.00           | 1.71          | BRAF; MEK                     |
| 1424154_a_at       | Isca2         | iron-sulfur cluster assembly 2 homolog (S. cerevisiae)                   | 6.83           | 0.00           | 1.42          | BRAF; MEK                     |
| 1455833_at         | Afap1l2       | actin filament associated protein 1-like 2                               | 6.83           | 0.00           | 1.78          | ; n.r.                        |
| 1421022_x_at       | Acyp1         | acylphosphatase 1. erythrocyte (common) type                             | 6.83           | 0.00           | 1.58          | BRAF; n.r.                    |
| 1424628_a_at       | 1500032D16Rik | RIKEN cDNA 1500032D16 gene                                               | 6.82           | 0.00           | 1.59          | BRAF                          |
| 1450410_a_at       | 4930570C03Rik | RIKEN cDNA 4930570C03 gene                                               | 6.82           | 0.00           | 2.25          | BRAF                          |
| 1416408_at         | Acox1         | acyl-Coenzyme A oxidase 1. palmitoyl                                     | 6.81           | 0.00           | 1.93          | BRAF; MEK                     |
| 1448233_at         | Prnp          | prion protein                                                            | 6.80           | 0.00           | 2.46          | BRAF; MEK                     |
| 1456245_x_at       | Vamp3         | vesicle-associated membrane protein 3                                    | 6.80           | 0.00           | 1.45          | BRAF; MEK                     |
| 1425869_a_at       | Psen2         | presenilin 2                                                             | 6.79           | 0.00           | 1.70          | BRAF; MEK                     |
| 1417527_at         | Ap3m2         | adaptor-related protein complex 3. mu 2 subunit                          | 6.77           | 0.00           | 2.03          | BRAF; MEK                     |
| 1426997_at         | Thra          | thyroid hormone receptor alpha                                           | 6.77           | 0.00           | 1.80          | BRAF; MEK                     |
| 1451854_a_at       | Shroom3       | shroom family member 3                                                   | 6.77           | 0.00           | 1.72          | BRAF; MEK                     |

| <b>Probeset ID</b> | <b>Symbol</b> | <b>Gene Name</b>                                                                                             | <b>d-value</b> | <b>q-value</b> | <b>R-fold</b> | <b>Expression reversed by</b> |
|--------------------|---------------|--------------------------------------------------------------------------------------------------------------|----------------|----------------|---------------|-------------------------------|
| 1447845_s_at       | Vnn1          | vanin 1                                                                                                      | 6.76           | 0.00           | 21.50         | BRAF; MEK                     |
| 1426743_at         | Appl2         | adaptor protein. phosphotyrosine interaction. PH domain and leucine zipper containing 2                      | 6.74           | 0.00           | 2.67          | BRAF; MEK                     |
| 1433628_at         | Coq10a        | coenzyme Q10 homolog A (yeast)                                                                               | 6.73           | 0.00           | 1.79          | BRAF; MEK                     |
| 1424833_at         | Itpr2         | inositol 1.4.5-triphosphate receptor 2                                                                       | 6.73           | 0.00           | 2.68          | ; MEK                         |
| 1455596_a_at       | BC029214      | cDNA sequence BC029214                                                                                       | 6.73           | 0.00           | 1.84          | BRAF; MEK                     |
| 1435085_at         | NA            | NA                                                                                                           | 6.71           | 0.00           | 2.76          | BRAF; MEK                     |
| 1425141_at         | Lactb2        | lactamase. beta 2                                                                                            | 6.71           | 0.00           | 2.16          | BRAF; MEK                     |
| 1435028_at         | Wdr7          | WD repeat domain 7                                                                                           | 6.71           | 0.00           | 1.53          | BRAF; MEK                     |
| 1423205_at         | Tm9sf4        | transmembrane 9 superfamily protein member 4                                                                 | 6.70           | 0.00           | 1.38          |                               |
| 1454810_s_at       | Vps8          | vacuolar protein sorting 8 homolog (S. cerevisiae)                                                           | 6.68           | 0.00           | 1.50          | BRAF; MEK                     |
| 1452385_at         | Usp53         | ubiquitin specific peptidase 53                                                                              | 6.68           | 0.00           | 2.55          | BRAF; MEK                     |
| 1417934_at         | Dnajc4        | DnaJ (Hsp40) homolog. subfamily C. member 4                                                                  | 6.68           | 0.00           | 1.42          | ; MEK                         |
| 1432419_a_at       | 2700078K21Rik | RIKEN cDNA 2700078K21 gene                                                                                   | 6.67           | 0.00           | 2.13          | BRAF; MEK                     |
| 1426435_at         | Tmem135       | transmembrane protein 135                                                                                    | 6.66           | 0.00           | 1.54          | BRAF; MEK                     |
| 1458359_at         | NA            | NA                                                                                                           | 6.65           | 0.00           | 1.32          | BRAF; MEK                     |
| 1452309_at         | Cgnl1         | cingulin-like 1                                                                                              | 6.65           | 0.00           | 2.14          | BRAF; MEK                     |
| 1454677_at         | Timp2         | tissue inhibitor of metalloproteinase 2                                                                      | 6.64           | 0.00           | 2.11          | BRAF; MEK                     |
| 1417236_at         | Ehd3          | EH-domain containing 3                                                                                       | 6.62           | 0.00           | 1.97          | BRAF; MEK                     |
| 1426285_at         | Lama2         | laminin. alpha 2                                                                                             | 6.61           | 0.00           | 2.27          | BRAF; MEK                     |
| 1417639_at         | Slc22a4       | solute carrier family 22 (organic cation transporter). member 4                                              | 6.61           | 0.00           | 2.69          | BRAF; MEK                     |
| 1449267_at         | Chid1         | chitinase domain containing 1                                                                                | 6.61           | 0.00           | 1.60          | BRAF; MEK                     |
| 1415756_a_at       | Snapin        | SNAP-associated protein                                                                                      | 6.59           | 0.00           | 1.62          | BRAF; MEK                     |
| 1427244_at         | Ttc15         | tetratricopeptide repeat domain 15                                                                           | 6.58           | 0.00           | 1.48          |                               |
| 1428332_at         | Pik3ip1       | phosphoinositide-3-kinase interacting protein 1                                                              | 6.55           | 0.00           | 2.40          | ; n.r.                        |
| 1450222_x_at       | Klk1b4        | kallikrein 1-related peptidase b4                                                                            | 6.55           | 0.00           | 1.12          | BRAF; MEK                     |
| 1451172_at         | Tprgl         | transformation related protein 63 regulated like                                                             | 6.55           | 0.00           | 2.09          | BRAF; MEK                     |
| 1429176_at         | Lrsam1        | leucine rich repeat and sterile alpha motif containing 1                                                     | 6.55           | 0.00           | 1.82          |                               |
| 1424713_at         | Calml4        | calmodulin-like 4                                                                                            | 6.55           | 0.00           | 4.52          | ; n.r.                        |
| 1437683_x_at       | Serf2         | small EDRK-rich factor 2                                                                                     | 6.54           | 0.00           | 1.33          | BRAF; MEK                     |
| 1434385_at         | Tom1l2        | target of myb1-like 2 (chicken)                                                                              | 6.54           | 0.00           | 1.61          |                               |
| 1418486_at         | Vnn1          | vanin 1                                                                                                      | 6.53           | 0.00           | 23.38         | BRAF; MEK                     |
| 1445896_at         | 2810433D01Rik | RIKEN cDNA 2810433D01 gene                                                                                   | 6.52           | 0.00           | 3.28          | BRAF; MEK                     |
| 1431856_a_at       | C1qtnf6       | C1q and tumor necrosis factor related protein 6                                                              | 6.52           | 0.00           | 4.14          | BRAF; MEK                     |
| 1451490_at         | Lyp1a1        | lysophospholipase-like 1                                                                                     | 6.50           | 0.00           | 2.01          | BRAF; MEK                     |
| 1422668_at         | Serpinh9b     | serine (or cysteine) peptidase inhibitor. clade B. member 9b                                                 | 6.49           | 0.00           | 4.35          | ; MEK                         |
| 1435874_at         | Prkab2        | protein kinase. AMP-activated. beta 2 non-catalytic subunit                                                  | 6.48           | 0.00           | 1.73          | BRAF; MEK                     |
| 1423376_a_at       | Dok4          | docking protein 4                                                                                            | 6.48           | 0.00           | 1.78          | BRAF; MEK                     |
| 1443583_at         | LOC100043911  | hypothetical protein LOC100043911                                                                            | 6.48           | 0.00           | 1.36          | BRAF; MEK                     |
| 1455282_x_at       | Alas1         | aminolevulinic acid synthase 1                                                                               | 6.48           | 0.00           | 1.52          | BRAF; MEK                     |
| 1425819_at         | Zbtb7c        | zinc finger and BTB domain containing 7C                                                                     | 6.47           | 0.00           | 1.50          | ; MEK                         |
| 1444786_at         | Nol3          | nucleolar protein 3 (apoptosis repressor with CARD domain)                                                   | 6.45           | 0.00           | 2.06          | BRAF; MEK                     |
| 1456176_x_at       | Slc25a39      | solute carrier family 25. member 39                                                                          | 6.44           | 0.00           | 1.50          |                               |
| 1434036_at         | Mtss1         | metastasis suppressor 1                                                                                      | 6.44           | 0.00           | 5.90          | BRAF                          |
| 1418436_at         | Stx7          | syntaxin 7                                                                                                   | 6.43           | 0.00           | 1.36          | BRAF; MEK                     |
| 1428375_at         | 4932415G12Rik | RIKEN cDNA 4932415G12 gene                                                                                   | 6.42           | 0.00           | 1.72          |                               |
| 1452621_at         | Pcbd2         | pterin 4 alpha carbinolamine dehydratase/dimerization cofactor of hepatocyte nuclear factor 1 alpha (TCF1) 2 | 6.42           | 0.00           | 1.62          | BRAF; MEK                     |
| 1426801_at         | Sept8         | septin 8                                                                                                     | 6.42           | 0.00           | 2.05          | BRAF; MEK                     |
| 1454615_x_at       | Srp14         | signal recognition particle 14                                                                               | 6.40           | 0.00           | 1.35          | BRAF; MEK                     |
| 1436580_at         | Hgsnat        | heparan-alpha-glucosaminide N-acetyltransferase                                                              | 6.39           | 0.00           | 1.45          | ; MEK                         |
| 1427347_s_at       | Tubb2a        | tubulin. beta 2a                                                                                             | 6.39           | 0.00           | 1.97          | BRAF; MEK                     |
| 1435875_at         | Prkab2        | protein kinase. AMP-activated. beta 2 non-catalytic subunit                                                  | 6.39           | 0.00           | 1.65          | BRAF; MEK                     |
| 1455469_at         | Slc6a7        | solute carrier family 6 (neurotransmitter transporter. L-proline). member 7                                  | 6.38           | 0.00           | 1.24          | BRAF; MEK                     |
| 1449964_a_at       | Mlycd         | malonyl-CoA decarboxylase                                                                                    | 6.38           | 0.00           | 1.57          | ; MEK                         |
| 1422477_at         | Cables1       | Cdk5 and Abl enzyme substrate 1                                                                              | 6.37           | 0.00           | 2.52          | BRAF; n.r.                    |



| <b>Probeset ID</b> | <b>Symbol</b> | <b>Gene Name</b>                                                                       | <b>d-value</b> | <b>q-value</b> | <b>R-fold</b> | <b>Expression reversed by</b> |
|--------------------|---------------|----------------------------------------------------------------------------------------|----------------|----------------|---------------|-------------------------------|
| 1455390_at         | Alkbh6        | alkB. alkylation repair homolog 6 (E. coli)                                            | 6.37           | 0.00           | 1.57          | ; MEK                         |
| 1449117_at         | Jund          | Jun proto-oncogene related gene d                                                      | 6.37           | 0.00           | 1.58          |                               |
| 1417545_at         | Trpv4         | transient receptor potential cation channel. subfamily V. member 4                     | 6.35           | 0.00           | 1.66          | ; n.r.                        |
| 1451196_at         | Ypel5         | yippee-like 5 (Drosophila)                                                             | 6.34           | 0.00           | 2.07          | BRAF; MEK                     |
| 1424214_at         | 9130213B05Rik | RIKEN cDNA 9130213B05 gene                                                             | 6.34           | 0.00           | 4.98          | BRAF; MEK                     |
| 1437112_at         | Pld1          | phospholipase D1                                                                       | 6.33           | 0.00           | 1.60          | BRAF; MEK                     |
| 1420336_at         | Adamtsl5      | ADAMTS-like 5                                                                          | 6.33           | 0.00           | 2.55          | BRAF; MEK                     |
| 1428621_a_at       | Vps25         | vacuolar protein sorting 25 (yeast)                                                    | 6.32           | 0.00           | 1.58          | ; MEK                         |
| 1424177_at         | Tmem38a       | transmembrane protein 38A                                                              | 6.32           | 0.00           | 1.88          | BRAF; MEK                     |
| 1424539_at         | Ubl4          | ubiquitin-like 4                                                                       | 6.30           | 0.00           | 1.98          | BRAF; MEK                     |
| 1424416_at         | Nkiras2       | NFKB inhibitor interacting Ras-like protein 2                                          | 6.30           | 0.00           | 1.70          | BRAF; MEK                     |
| 1433516_a_at       | Myeov2        | myeloma overexpressed 2                                                                | 6.30           | 0.00           | 1.62          | BRAF; MEK                     |
| 1436365_at         | Zbtb7c        | zinc finger and BTB domain containing 7C                                               | 6.29           | 0.00           | 2.33          | ; MEK                         |
| 1454470_at         | 4930404F17Rik | RIKEN cDNA 4930404F17 gene                                                             | 6.29           | 0.00           | 1.19          | BRAF; MEK                     |
| 1455594_at         | Exoc3         | exocyst complex component 3                                                            | 6.28           | 0.00           | 2.06          | BRAF; MEK                     |
| 1455671_at         | Commd8        | COMM domain containing 8                                                               | 6.26           | 0.00           | 1.35          |                               |
| 1448415_a_at       | Sema3b        | sema domain. immunoglobulin domain (lg). short basic domain. secreted. (semaphorin) 3B | 6.26           | 0.00           | 2.78          | BRAF; MEK                     |
| 1436109_at         | Al317395      | expressed sequence Al317395                                                            | 6.24           | 0.00           | 1.50          | BRAF; MEK                     |
| 1438549_a_at       | Srr           | serine racemase                                                                        | 6.24           | 0.00           | 1.72          | BRAF                          |
| 1426317_at         | Stard6        | StAR-related lipid transfer (START) domain containing 6                                | 6.24           | 0.00           | 1.85          | BRAF; MEK                     |
| 1460235_at         | Scarb2        | scavenger receptor class B. member 2                                                   | 6.24           | 0.00           | 1.40          | BRAF; MEK                     |
| 1416825_at         | Snta1         | syntrophin. acidic 1                                                                   | 6.23           | 0.00           | 2.93          | BRAF; MEK                     |
| 1450040_at         | Timp2         | tissue inhibitor of metalloproteinase 2                                                | 6.23           | 0.00           | 2.79          | BRAF; MEK                     |
| 1452702_at         | Cicn7         | chloride channel 7                                                                     | 6.22           | 0.00           | 1.66          | BRAF; MEK                     |
| 1439542_at         | Zfp651        | zinc finger protein 651                                                                | 6.22           | 0.00           | 1.76          | BRAF; MEK                     |
| 1426622_a_at       | Qpct          | glutaminyl-peptide cyclotransferase (glutaminyl cyclase)                               | 6.22           | 0.00           | 2.37          | BRAF                          |
| 1429961_at         | 1700021C14Rik | RIKEN cDNA 1700021C14 gene                                                             | 6.20           | 0.00           | 1.63          | n.r. ; n.r.                   |
| 1454654_at         | Dirc2         | disrupted in renal carcinoma 2 (human)                                                 | 6.20           | 0.00           | 1.75          | BRAF; MEK                     |
| 1422986_at         | Esrrb         | estrogen related receptor. beta                                                        | 6.20           | 0.00           | 1.29          | BRAF; MEK                     |
| 1417751_at         | Stk10         | serine/threonine kinase 10                                                             | 6.20           | 0.00           | 1.54          | n.r. ; n.r.                   |
| 1426624_a_at       | Ypel3         | yippee-like 3 (Drosophila)                                                             | 6.19           | 0.00           | 1.94          | BRAF; MEK                     |
| 1456267_at         | Mef2b         | myocyte enhancer factor 2B                                                             | 6.19           | 0.00           | 1.84          | ; MEK                         |
| 1447850_x_at       | Zfand3        | zinc finger. AN1-type domain 3                                                         | 6.18           | 0.00           | 1.37          | ; MEK                         |
| 1429164_at         | Prss36        | protease. serine. 36                                                                   | 6.18           | 0.00           | 1.44          | BRAF; MEK                     |
| 1435910_at         | Fads3         | fatty acid desaturase 3                                                                | 6.18           | 0.00           | 1.96          | BRAF; MEK                     |
| 1456134_x_at       | Yif1a         | Yip1 interacting factor homolog A (S. cerevisiae)                                      | 6.17           | 0.00           | 1.42          | BRAF; MEK                     |
| 1424359_at         | Oplah         | 5-oxoprolinase (ATP-hydrolysing)                                                       | 6.17           | 0.00           | 1.43          |                               |
| 1455045_at         | Srr           | serine racemase                                                                        | 6.17           | 0.00           | 2.18          | BRAF; MEK                     |
| 1416154_at         | Srp54a        | signal recognition particle 54a                                                        | 6.16           | 0.00           | 1.16          | n.r. ; MEK                    |
| 1417421_at         | S100a1        | S100 calcium binding protein A1                                                        | 6.14           | 0.00           | 1.86          | BRAF                          |
| 1427050_at         | Txndc16       | thioredoxin domain containing 16                                                       | 6.14           | 0.00           | 2.16          | BRAF; MEK                     |
| 1451074_at         | Rnf13         | ring finger protein 13                                                                 | 6.13           | 0.00           | 1.91          | BRAF; MEK                     |
| 1420859_at         | Pkia          | protein kinase inhibitor. alpha                                                        | 6.13           | 0.00           | 2.86          | BRAF; MEK                     |
| 1417392_a_at       | Slc7a7        | solute carrier family 7 (cationic amino acid transporter. y+ system). member 7         | 6.13           | 0.00           | 1.85          | BRAF; MEK                     |
| 1416327_at         | Ufc1          | ubiquitin-fold modifier conjugating enzyme 1                                           | 6.13           | 0.00           | 1.42          | BRAF                          |
| 1436678_at         | Sgcb          | sarcoglycan. beta (dystrophin-associated glycoprotein)                                 | 6.12           | 0.00           | 2.50          | BRAF; MEK                     |
| 1424979_at         | Aph1a         | anterior pharynx defective 1a homolog (C. elegans)                                     | 6.12           | 0.00           | 1.62          | BRAF; MEK                     |
| 1448954_at         | Nrip3         | nuclear receptor interacting protein 3                                                 | 6.11           | 0.00           | 5.06          | BRAF; MEK                     |
| 1454675_at         | Thra          | thyroid hormone receptor alpha                                                         | 6.11           | 0.00           | 2.42          | BRAF                          |
| 1420772_a_at       | Tsc22d3       | TSC22 domain family. member 3                                                          | 6.11           | 0.00           | 3.80          | BRAF; MEK                     |
| 1459850_x_at       | Glr3          | glycine receptor. beta subunit                                                         | 6.09           | 0.00           | 4.33          | BRAF                          |
| 1419954_s_at       | Zfand3        | zinc finger. AN1-type domain 3                                                         | 6.08           | 0.00           | 1.80          | BRAF; MEK                     |
| 1460695_a_at       | 2010111I01Rik | RIKEN cDNA 2010111I01 gene                                                             | 6.08           | 0.00           | 1.87          | BRAF; MEK                     |
| 1429083_at         | Agl           | amylo-1.6-glucosidase. 4-alpha-glucanotransferase                                      | 6.07           | 0.00           | 1.52          | BRAF; MEK                     |
| 1435928_at         | 6430548M08Rik | RIKEN cDNA 6430548M08 gene                                                             | 6.07           | 0.00           | 1.54          | BRAF; MEK                     |

| <b>Probeset ID</b> | <b>Symbol</b> | <b>Gene Name</b>                                                                                | <b>d-value</b> | <b>q-value</b> | <b>R-fold</b> | <b>Expression reversed by</b> |
|--------------------|---------------|-------------------------------------------------------------------------------------------------|----------------|----------------|---------------|-------------------------------|
| 1417970_at         | Atp5s         | ATP synthase. H+ transporting. mitochondrial F0 complex. subunit s                              | 6.06           | 0.00           | 1.74          | BRAF; MEK                     |
| 1416735_at         | Asah1         | N-acylsphingosine amidohydrolase 1                                                              | 6.06           | 0.00           | 1.95          | BRAF; MEK                     |
| 1437038_x_at       | 1700029I08Rik | RIKEN cDNA 1700029I08 gene                                                                      | 6.06           | 0.00           | 1.32          | BRAF; MEK                     |
| 1434510_at         | Papss2        | 3'-phosphoadenosine 5'-phosphosulfate synthase 2                                                | 6.05           | 0.00           | 3.26          | BRAF; MEK                     |
| 1422831_at         | Fbn2          | fibrillin 2                                                                                     | 6.05           | 0.00           | 13.40         | BRAF                          |
| 1428202_at         | 1810037C20Rik | RIKEN cDNA 1810037C20 gene                                                                      | 6.05           | 0.00           | 1.49          | BRAF                          |
| 1436272_at         | Rab3gap2      | RAB3 GTPase activating protein subunit 2                                                        | 6.04           | 0.00           | 1.59          | BRAF; MEK                     |
| 1451362_at         | Rab711        | RAB7. member RAS oncogene family-like 1                                                         | 6.04           | 0.00           | 1.88          | BRAF; MEK                     |
| 1420641_a_at       | Sqrdl         | sulfide quinone reductase-like (yeast)                                                          | 6.04           | 0.00           | 2.28          | BRAF                          |
| 1441081_a_at       | 1110038B12Rik | RIKEN cDNA 1110038B12 gene                                                                      | 6.04           | 0.00           | 1.46          | ; MEK                         |
| 1434944_at         | Dmpk          | dystrophia myotonica-protein kinase                                                             | 6.04           | 0.00           | 5.29          | BRAF; MEK                     |
| 1417590_at         | Cyp27a1       | cytochrome P450. family 27. subfamily a. polypeptide 1                                          | 6.03           | 0.00           | 2.28          | BRAF; MEK                     |
| 1422568_at         | Ndel1         | nuclear distribution gene E-like homolog 1 (A. nidulans)                                        | 6.03           | 0.00           | 1.37          | BRAF; MEK                     |
| 1416880_at         | Mcl1          | myeloid cell leukemia sequence 1                                                                | 6.03           | 0.00           | 1.67          | BRAF                          |
| 1453767_a_at       | Nt5m          | 5'.3'-nucleotidase. mitochondrial                                                               | 6.02           | 0.00           | 1.50          | ; MEK                         |
| 1421088_at         | Gpc4          | glypican 4                                                                                      | 6.01           | 0.00           | 1.76          | BRAF; MEK                     |
| 1435189_at         | Frmppd1       | FERM and PDZ domain containing 1                                                                | 6.01           | 0.00           | 1.62          | BRAF; MEK                     |
| 1423348_at         | Fzd8          | frizzled homolog 8 (Drosophila)                                                                 | 6.01           | 0.00           | 1.96          | BRAF; MEK                     |
| 1451814_a_at       | Htatip2       | HIV-1 tat interactive protein 2. homolog (human)                                                | 6.01           | 0.00           | 1.73          | ; MEK                         |
| 1427927_at         | Hscb          | HscB iron-sulfur cluster co-chaperone homolog (E. coli)                                         | 6.01           | 0.00           | 1.63          | BRAF; MEK                     |
| 1417149_at         | P4ha2         | procollagen-proline. 2-oxoglutarate 4-dioxygenase (proline 4-hydroxylase). alpha II polypeptide | 6.00           | 0.00           | 1.95          | BRAF; MEK                     |
| 1436560_at         | Kif3a         | kinesin family member 3A                                                                        | 6.00           | 0.00           | 2.41          | BRAF; MEK                     |
| 1448912_at         | C1qtnf1       | C1q and tumor necrosis factor related protein 1                                                 | 5.99           | 0.00           | 1.43          |                               |
| 1416373_at         | Nfs1          | nitrogen fixation gene 1 (S. cerevisiae)                                                        | 5.99           | 0.00           | 1.33          | BRAF; MEK                     |
| 1430985_at         | 1810027O10Rik | RIKEN cDNA 1810027O10 gene                                                                      | 5.99           | 0.00           | 1.67          | BRAF; MEK                     |
| 1450922_a_at       | Tgfb2         | transforming growth factor. beta 2                                                              | 5.98           | 0.00           | 3.82          | BRAF; MEK                     |
| 1417272_at         | 9130005N14Rik | RIKEN cDNA 9130005N14 gene                                                                      | 5.98           | 0.00           | 1.81          | BRAF; MEK                     |
| 1423086_at         | Npc1          | Niemann Pick type C1                                                                            | 5.98           | 0.00           | 1.61          | BRAF; MEK                     |
| 1443916_at         | 2900026A02Rik | RIKEN cDNA 2900026A02 gene                                                                      | 5.98           | 0.00           | 1.55          | BRAF; MEK                     |
| 1437245_at         | Tmem154       | transmembrane protein 154                                                                       | 5.96           | 0.00           | 1.52          | BRAF; MEK                     |
| 1449043_at         | Naga          | N-acetyl galactosaminidase. alpha                                                               | 5.96           | 0.00           | 1.82          | BRAF                          |
| 1433833_at         | Fndc3b        | fibronectin type III domain containing 3B                                                       | 5.96           | 0.00           | 1.70          | BRAF; MEK                     |
| 1452134_at         | Tmem175       | transmembrane protein 175                                                                       | 5.95           | 0.00           | 1.89          | BRAF; MEK                     |
| 1452590_a_at       | Plac9         | placenta specific 9                                                                             | 5.95           | 0.00           | 5.33          | BRAF; MEK                     |
| 1418164_at         | Stx2          | syntaxin 2                                                                                      | 5.94           | 0.00           | 1.51          |                               |
| 1428445_at         | Yif1b         | Yip1 interacting factor homolog B (S. cerevisiae)                                               | 5.94           | 0.00           | 1.42          | BRAF; MEK                     |
| 1424242_at         | Bphl          | biphenyl hydrolase-like (serine hydrolase. breast epithelial mucin-associated antigen)          | 5.93           | 0.00           | 1.63          | BRAF                          |
| 1424834_s_at       | Itpr2         | inositol 1.4.5-triphosphate receptor 2                                                          | 5.93           | 0.00           | 2.48          |                               |
| 1423425_at         | 1300012G16Rik | RIKEN cDNA 1300012G16 gene                                                                      | 5.92           | 0.00           | 1.55          | ; MEK                         |
| 1450628_at         | Slc2a8        | solute carrier family 2. (facilitated glucose transporter). member 8                            | 5.92           | 0.00           | 1.44          | BRAF; MEK                     |
| 1432136_s_at       | Zdhhc4        | zinc finger. DHHC domain containing 4                                                           | 5.92           | 0.00           | 1.54          |                               |
| 1416130_at         | Prnp          | prion protein                                                                                   | 5.91           | 0.00           | 3.46          | BRAF; MEK                     |
| 1452847_at         | 2410008K03Rik | RIKEN cDNA 2410008K03 gene                                                                      | 5.91           | 0.00           | 1.79          | BRAF                          |
| 1417881_at         | Slc39a3       | solute carrier family 39 (zinc transporter). member 3                                           | 5.91           | 0.00           | 1.85          | BRAF; MEK                     |
| 1422771_at         | Smad6         | MAD homolog 6 (Drosophila)                                                                      | 5.89           | 0.00           | 2.92          | BRAF; MEK                     |
| 1426974_at         | Os9           | amplified in osteosarcoma                                                                       | 5.88           | 0.00           | 1.35          | BRAF                          |
| 1419664_at         | Srr           | serine racemase                                                                                 | 5.88           | 0.00           | 2.30          | BRAF; MEK                     |
| 1460180_at         | Hexb          | hexosaminidase B                                                                                | 5.88           | 0.00           | 1.76          | BRAF; MEK                     |
| 1426167_a_at       | Camk4         | calcium/calmodulin-dependent protein kinase IV                                                  | 5.88           | 0.00           | 1.82          | BRAF; MEK                     |
| 1436070_at         | Glo1          | glyoxalase 1                                                                                    | 5.87           | 0.00           | 2.00          | BRAF                          |
| 1449263_at         | Ufm1          | ubiquitin-fold modifier 1                                                                       | 5.87           | 0.00           | 1.82          | BRAF; MEK                     |
| 1421120_at         | Myo6          | myosin VI                                                                                       | 5.87           | 0.00           | 1.30          | BRAF; MEK                     |
| 1417283_at         | Lynx1         | Ly6/neurotoxin 1                                                                                | 5.86           | 0.00           | 3.03          | BRAF; MEK                     |
| 1449455_at         | Hck           | hemopoietic cell kinase                                                                         | 5.86           | 0.00           | 2.67          | BRAF; MEK                     |
| 1428851_at         | 1300014I06Rik | RIKEN cDNA 1300014I06 gene                                                                      | 5.84           | 0.00           | 2.19          | BRAF; MEK                     |

| <b>Probeset ID</b> | <b>Symbol</b> | <b>Gene Name</b>                                                                                               | <b>d-value</b> | <b>q-value</b> | <b>R-fold</b> | <b>Expression reversed by</b> |
|--------------------|---------------|----------------------------------------------------------------------------------------------------------------|----------------|----------------|---------------|-------------------------------|
| 1424726_at         | Tmem150       | transmembrane protein 150                                                                                      | 5.83           | 0.00           | 1.88          | BRAF; MEK                     |
| 1458412_at         | Zfp78         | zinc finger protein 78                                                                                         | 5.83           | 0.00           | 1.65          | BRAF; MEK                     |
| 1440975_at         | Mxra7         | matrix-remodelling associated 7                                                                                | 5.82           | 0.00           | 2.48          | BRAF; MEK                     |
| 1415896_x_at       | Snrpn         | small nuclear ribonucleoprotein N                                                                              | 5.82           | 0.00           | 1.33          | BRAF; MEK                     |
| 1448808_a_at       | Nme2          | non-metastatic cells 2. protein (NM23B) expressed in                                                           | 5.81           | 0.00           | 1.08          | ; MEK                         |
| 1453153_at         | Lins2         | lines homolog 2 (Drosophila)                                                                                   | 5.81           | 0.00           | 1.34          | ; MEK                         |
| 1430668_a_at       | Ankra2        | ankyrin repeat. family A (RFXANK-like). 2                                                                      | 5.80           | 0.00           | 1.28          | BRAF; MEK                     |
| 1451381_at         | 1810020D17Rik | RIKEN cDNA 1810020D17 gene                                                                                     | 5.80           | 0.00           | 1.83          | BRAF; MEK                     |
| 1419666_x_at       | Nupr1         | nuclear protein 1                                                                                              | 5.80           | 0.00           | 3.48          | BRAF; MEK                     |
| 1423913_at         | Hectd3        | HECT domain containing 3                                                                                       | 5.80           | 0.00           | 1.74          | BRAF; MEK                     |
| 1460608_at         | Cacna1b       | calcium channel. voltage-dependent. N type. alpha 1B subunit                                                   | 5.79           | 0.00           | 1.15          | BRAF                          |
| 1422504_at         | Glr3          | glycine receptor. beta subunit                                                                                 | 5.79           | 0.00           | 4.76          | BRAF                          |
| 1453004_at         | Slc22a23      | solute carrier family 22. member 23                                                                            | 5.78           | 0.00           | 3.59          | BRAF; MEK                     |
| 1455781_at         | BC027231      | cDNA sequence BC027231                                                                                         | 5.77           | 0.00           | 2.31          | BRAF; MEK                     |
| 1426461_at         | Ugp2          | UDP-glucose pyrophosphorylase 2                                                                                | 5.77           | 0.00           | 2.05          | BRAF; MEK                     |
| 1434454_at         | Adcy9         | adenylate cyclase 9                                                                                            | 5.77           | 0.00           | 1.50          | BRAF; MEK                     |
| 1460623_at         | Skap2         | src family associated phosphoprotein 2                                                                         | 5.76           | 0.00           | 2.52          |                               |
| 1418068_at         | Ndufa10       | NADH dehydrogenase (ubiquinone) 1 alpha subcomplex 10                                                          | 5.76           | 0.00           | 1.30          | ; MEK                         |
| 1435360_at         | Zfp651        | zinc finger protein 651                                                                                        | 5.76           | 0.00           | 1.95          | BRAF; MEK                     |
| 1428667_at         | Maoa          | monoamine oxidase A                                                                                            | 5.76           | 0.00           | 1.57          | BRAF; MEK                     |
| 1433722_at         | Akap13        | A kinase (PRKA) anchor protein 13                                                                              | 5.75           | 0.00           | 1.67          | BRAF; MEK                     |
| 1434715_at         | 1600014C10Rik | RIKEN cDNA 1600014C10 gene                                                                                     | 5.74           | 0.00           | 1.40          | BRAF; MEK                     |
| 1454690_at         | Ikbg          | inhibitor of kappaB kinase gamma                                                                               | 5.74           | 0.00           | 1.95          |                               |
| 1421571_a_at       | Ly6c1         | lymphocyte antigen 6 complex. locus C1                                                                         | 5.74           | 0.00           | 7.22          | ; n.r.                        |
| 1448858_at         | Ulk2          | Unc-51 like kinase 2 (C. elegans)                                                                              | 5.74           | 0.00           | 1.77          | BRAF; MEK                     |
| 1436502_at         | Mtus1         | mitochondrial tumor suppressor 1                                                                               | 5.74           | 0.00           | 1.95          | BRAF; MEK                     |
| 1434265_s_at       | Ank2          | ankyrin 2. brain                                                                                               | 5.73           | 0.00           | 3.80          | BRAF                          |
| 1439843_at         | Camk4         | calcium/calmodulin-dependent protein kinase IV                                                                 | 5.73           | 0.00           | 4.84          | BRAF; MEK                     |
| 1419667_at         | Sgcb          | sarcoglycan. beta (dystrophin-associated glycoprotein)                                                         | 5.73           | 0.00           | 1.66          | BRAF; MEK                     |
| 1418088_a_at       | Stx8          | syntaxin 8                                                                                                     | 5.72           | 0.00           | 1.54          | BRAF; MEK                     |
| 1418961_at         | Necap2        | NECAP endocytosis associated 2                                                                                 | 5.72           | 0.00           | 1.67          | BRAF; MEK                     |
| 1422593_at         | Ap3s1         | adaptor-related protein complex 3. sigma 1 subunit                                                             | 5.72           | 0.00           | 1.63          | ; MEK                         |
| 1416195_at         | RP23-136K12.4 | putative phosphatase                                                                                           | 5.72           | 0.00           | 1.58          | BRAF; MEK                     |
| 1443620_at         | NA            | NA                                                                                                             | 5.71           | 0.00           | 1.99          | BRAF; MEK                     |
| 1451486_at         | Slc46a3       | solute carrier family 46. member 3                                                                             | 5.71           | 0.00           | 1.54          | BRAF; MEK                     |
| 1420696_at         | Sema3c        | sema domain. immunoglobulin domain (Ig). short basic domain. secreted. (semaphorin) 3C                         | 5.71           | 0.00           | 6.20          | BRAF; MEK                     |
| 1436063_at         | Loxl1         | lysyl oxidase-like 1                                                                                           | 5.71           | 0.00           | 1.98          | BRAF; MEK                     |
| 1433662_s_at       | Timp2         | tissue inhibitor of metalloproteinase 2                                                                        | 5.71           | 0.00           | 2.13          | BRAF; MEK                     |
| 1449023_a_at       | Ezh1          | enhancer of zeste homolog 1 (Drosophila)                                                                       | 5.70           | 0.00           | 1.73          |                               |
| 1459900_at         | C79468        | expressed sequence C79468                                                                                      | 5.70           | 0.00           | 2.07          | BRAF; MEK                     |
| 1450658_at         | Adamts5       | a disintegrin-like and metalloproteinase (reprolysin type) with thrombospondin type 1 motif. 5 (aggrecanase-2) | 5.70           | 0.00           | 2.77          | ; MEK                         |
| 1427955_a_at       | Deb1          | differentially expressed in B16F10 1                                                                           | 5.70           | 0.00           | 1.62          | BRAF; MEK                     |
| 1436102_at         | Sec22c        | SEC22 vesicle trafficking protein homolog C (S. cerevisiae)                                                    | 5.69           | 0.00           | 1.49          | n.r. ;                        |
| 1442351_a_at       | BC029214      | cDNA sequence BC029214                                                                                         | 5.69           | 0.00           | 1.36          | BRAF; MEK                     |
| 1427324_at         | Tmem120b      | transmembrane protein 120B                                                                                     | 5.68           | 0.00           | 1.78          | BRAF; MEK                     |
| 1433693_x_at       | Vamp3         | vesicle-associated membrane protein 3                                                                          | 5.68           | 0.00           | 1.31          | BRAF; MEK                     |
| 1416843_at         | Pde6d         | phosphodiesterase 6D. cGMP-specific. rod. delta                                                                | 5.68           | 0.00           | 1.38          |                               |
| 1448260_at         | Uchl1         | ubiquitin carboxy-terminal hydrolase L1                                                                        | 5.68           | 0.00           | 3.27          | BRAF; MEK                     |
| 1427377_x_at       | Hsd3b3        | hydroxy-delta-5-steroid dehydrogenase. 3 beta- and steroid delta-isomerase 3                                   | 5.67           | 0.00           | 1.29          | ; MEK                         |
| 1419509_a_at       | Nagk          | N-acetylglucosamine kinase                                                                                     | 5.67           | 0.00           | 1.46          | BRAF; MEK                     |
| 1426697_a_at       | Lrpap1        | low density lipoprotein receptor-related protein associated protein 1                                          | 5.66           | 0.00           | 1.98          | BRAF; MEK                     |
| 1417566_at         | Abhd5         | abhydrolase domain containing 5                                                                                | 5.66           | 0.00           | 1.93          | BRAF; MEK                     |
| 1436224_at         | Kif1c         | kinesin family member 1C                                                                                       | 5.65           | 0.00           | 1.84          | ; MEK                         |
| 1427918_a_at       | Rhoq          | ras homolog gene family. member Q                                                                              | 5.65           | 0.00           | 1.64          | BRAF; MEK                     |



| <b>Probeset ID</b> | <b>Symbol</b> | <b>Gene Name</b>                                                                          | <b>d-value</b> | <b>q-value</b> | <b>R-fold</b> | <b>Expression reversed by</b> |
|--------------------|---------------|-------------------------------------------------------------------------------------------|----------------|----------------|---------------|-------------------------------|
| 1433529_at         | E430002G05Rik | RIKEN cDNA E430002G05 gene                                                                | 5.65           | 0.00           | 22.81         | BRAF; MEK                     |
| 1453303_at         | 4833417J20Rik | RIKEN cDNA 4833417J20 gene                                                                | 5.65           | 0.00           | 2.20          | BRAF; MEK                     |
| 1427196_at         | Wnk4          | WNK lysine deficient protein kinase 4                                                     | 5.65           | 0.00           | 1.53          | n.r. ; n.r.                   |
| 1420382_at         | Apob48r       | apolipoprotein B48 receptor                                                               | 5.64           | 0.00           | 2.64          | BRAF; MEK                     |
| 1424354_at         | Tmem140       | transmembrane protein 140                                                                 | 5.64           | 0.00           | 2.91          | BRAF; MEK                     |
| 1421170_a_at       | Plcb1         | phospholipase C. beta 1                                                                   | 5.63           | 0.00           | 1.31          | ; MEK                         |
| 1417168_a_at       | Usp2          | ubiquitin specific peptidase 2                                                            | 5.62           | 0.00           | 1.82          | ; MEK                         |
| 1438568_at         | Mrgpre        | MAS-related GPR. member E                                                                 | 5.61           | 0.00           | 1.85          | BRAF; MEK                     |
| 1438967_x_at       | Amhr2         | anti-Mullerian hormone type 2 receptor                                                    | 5.61           | 0.00           | 2.14          | ; MEK                         |
| 1433852_at         | C330002I19Rik | RIKEN cDNA C330002I19 gene                                                                | 5.61           | 0.00           | 1.56          | BRAF; MEK                     |
| 1425333_at         | Rab43         | RAB43. member RAS oncogene family                                                         | 5.60           | 0.00           | 1.76          | ; MEK                         |
| 1431188_a_at       | Tom1          | target of myb1 homolog (chicken)                                                          | 5.60           | 0.00           | 2.09          | BRAF; MEK                     |
| 1456424_s_at       | Pltp          | phospholipid transfer protein                                                             | 5.60           | 0.00           | 3.45          |                               |
| 1448547_at         | Rassf3        | Ras association (RalGDS/AF-6) domain family member 3                                      | 5.59           | 0.00           | 2.00          | BRAF; MEK                     |
| 1416331_a_at       | Nfe2l1        | nuclear factor. erythroid derived 2.-like 1                                               | 5.59           | 0.00           | 1.78          | BRAF; MEK                     |
| 1452907_at         | Galc          | galactosylceramidase                                                                      | 5.59           | 0.00           | 1.25          | n.r. ;                        |
| 1439153_at         | Rnf144b       | ring finger protein 144B                                                                  | 5.58           | 0.00           | 2.52          | ; MEK                         |
| 1448104_at         | Aldh6a1       | aldehyde dehydrogenase family 6. subfamily A1                                             | 5.58           | 0.00           | 3.04          | BRAF                          |
| 1435009_at         | Slc9a6        | solute carrier family 9 (sodium/hydrogen exchanger). member 6                             | 5.58           | 0.00           | 1.61          | BRAF; MEK                     |
| 1435367_at         | Mapk4         | mitogen-activated protein kinase 4                                                        | 5.58           | 0.00           | 1.53          |                               |
| 1452182_at         | Galnt2        | UDP-N-acetyl-alpha-D-galactosamine:polypeptide N-acetylgalactosaminyltransferase 2        | 5.58           | 0.00           | 1.40          | ; MEK                         |
| 1435213_at         | Nhlrc1        | NHL repeat containing 1                                                                   | 5.57           | 0.00           | 1.48          | ; MEK                         |
| 1416395_at         | Guk1          | guanylate kinase 1                                                                        | 5.57           | 0.00           | 1.63          | ; MEK                         |
| 1455377_at         | Tll7          | tubulin tyrosine ligase-like family. member 7                                             | 5.57           | 0.00           | 2.21          | BRAF                          |
| 1419617_at         | Kcnn1         | potassium intermediate/small conductance calcium-activated channel. subfamily N. member 1 | 5.57           | 0.00           | 1.40          | BRAF; MEK                     |
| 1429987_at         | 9930013L23Rik | RIKEN cDNA 9930013L23 gene                                                                | 5.56           | 0.00           | 9.53          | BRAF                          |
| 1416272_at         | Map2k1ip1     | mitogen-activated protein kinase kinase 1 interacting protein 1                           | 5.56           | 0.00           | 1.62          | BRAF; MEK                     |
| 1436513_at         | Tanc2         | tetratricopeptide repeat. ankyrin repeat and coiled-coil containing 2                     | 5.55           | 0.00           | 1.56          | ; n.r.                        |
| 1452888_at         | 1110034G24Rik | RIKEN cDNA 1110034G24 gene                                                                | 5.55           | 0.00           | 2.04          | BRAF; MEK                     |
| 1424362_at         | Ppapdc3       | phosphatidic acid phosphatase type 2 domain containing 3                                  | 5.55           | 0.00           | 1.88          | BRAF; MEK                     |
| 1417301_at         | Fzd6          | frizzled homolog 6 (Drosophila)                                                           | 5.54           | 0.00           | 1.81          | BRAF                          |
| 1453573_at         | Hist2h3c1     | histone cluster 2. H3c1                                                                   | 5.53           | 0.00           | 2.13          | BRAF; MEK                     |
| 1418174_at         | Dbp           | D site albumin promoter binding protein                                                   | 5.53           | 0.00           | 1.38          | BRAF                          |
| 1434537_at         | Slco3a1       | solute carrier organic anion transporter family. member 3a1                               | 5.53           | 0.00           | 2.45          | BRAF; MEK                     |
| 1449929_at         | Dynlt3        | dynein light chain Tctex-type 3                                                           | 5.53           | 0.00           | 1.65          | BRAF; MEK                     |
| 1455438_at         | NA            | NA                                                                                        | 5.52           | 0.00           | 1.77          | BRAF; MEK                     |
| 1434004_at         | Dhps          | deoxyhypusine synthase                                                                    | 5.52           | 0.00           | 1.49          | ; MEK                         |
| 1448867_at         | Tmem9b        | TMEM9 domain family. member B                                                             | 5.52           | 0.00           | 1.59          | BRAF; MEK                     |
| 1433763_at         | Entpd5        | ectonucleoside triphosphate diphosphohydrolase 5                                          | 5.51           | 0.00           | 1.60          | BRAF; MEK                     |
| 1415759_a_at       | Hbxip         | hepatitis B virus x interacting protein                                                   | 5.51           | 0.00           | 1.23          | BRAF; MEK                     |
| 1437149_at         | Slc6a6        | solute carrier family 6 (neurotransmitter transporter. taurine). member 6                 | 5.51           | 0.00           | 1.81          | BRAF; MEK                     |
| 1455793_at         | BC035537      | cDNA sequence BC035537                                                                    | 5.51           | 0.00           | 1.36          | ; MEK                         |
| 1424614_at         | Frag1         | FGF receptor activating protein 1                                                         | 5.50           | 0.00           | 1.46          | BRAF; MEK                     |
| 1426615_s_at       | Ndrp4         | N-myc downstream regulated gene 4                                                         | 5.50           | 0.00           | 2.72          | BRAF; MEK                     |
| 1439389_s_at       | Myadm         | myeloid-associated differentiation marker                                                 | 5.49           | 0.00           | 1.24          | BRAF; MEK                     |
| 1433942_at         | Myo6          | myosin VI                                                                                 | 5.49           | 0.00           | 1.79          | BRAF                          |
| 1417700_at         | Rab38         | Rab38. member of RAS oncogene family                                                      | 5.49           | 0.00           | 2.69          | BRAF; MEK                     |
| 1452984_at         | Ccny          | cyclin Y                                                                                  | 5.49           | 0.00           | 1.61          | BRAF                          |
| 1423250_a_at       | Tgfb2         | transforming growth factor. beta 2                                                        | 5.48           | 0.00           | 3.72          | BRAF; MEK                     |
| 1434042_s_at       | Mtmt3         | myotubularin related protein 3                                                            | 5.48           | 0.00           | 1.48          | BRAF                          |
| 1435796_at         | Wscd2         | WSC domain containing 2                                                                   | 5.48           | 0.00           | 9.48          | ; MEK                         |
| 1419298_at         | Pon3          | paraoxonase 3                                                                             | 5.47           | 0.00           | 1.88          | BRAF; MEK                     |
| 1418699_s_at       | Fech          | ferrochelatase                                                                            | 5.47           | 0.00           | 1.21          | ; MEK                         |
| 1451390_s_at       | Zfand2b       | zinc finger. AN1 type domain 2B                                                           | 5.47           | 0.00           | 1.51          | BRAF; MEK                     |

| <b>Probeset ID</b> | <b>Symbol</b>     | <b>Gene Name</b>                                                                          | <b>d-value</b> | <b>q-value</b> | <b>R-fold</b> | <b>Expression reversed by</b> |
|--------------------|-------------------|-------------------------------------------------------------------------------------------|----------------|----------------|---------------|-------------------------------|
| 1451554_a_at       | Aph1a             | anterior pharynx defective 1a homolog (C. elegans)                                        | 5.47           | 0.00           | 1.49          | BRAF; MEK                     |
| 1448769_at         | Slc35b1           | solute carrier family 35. member B1                                                       | 5.47           | 0.00           | 1.30          | BRAF; MEK                     |
| 1436254_at         | NA                | NA                                                                                        | 5.46           | 0.00           | 1.42          | BRAF; MEK                     |
| 1460287_at         | Timp2             | tissue inhibitor of metalloproteinase 2                                                   | 5.46           | 0.00           | 1.57          | BRAF; MEK                     |
| 1418399_at         | Kctd9             | potassium channel tetramerisation domain containing 9                                     | 5.46           | 0.00           | 1.75          | BRAF; MEK                     |
| 1435387_at         | Slc2a13           | solute carrier family 2 (facilitated glucose transporter). member 13                      | 5.46           | 0.00           | 3.29          | BRAF; MEK                     |
| 1422118_at         | Sync              | syncollin                                                                                 | 5.46           | 0.00           | 1.98          | BRAF; MEK                     |
| 1424394_at         | Selm              | selenoprotein M                                                                           | 5.45           | 0.00           | 2.10          | BRAF; MEK                     |
| 1417226_at         | Fbxw4             | F-box and WD-40 domain protein 4                                                          | 5.45           | 0.00           | 1.44          | n.r. ; MEK                    |
| 1423745_at         | 1110031B06Rik     | RIKEN cDNA 1110031B06 gene                                                                | 5.45           | 0.00           | 1.81          | BRAF; MEK                     |
| 1439013_x_at       | Acyp1             | acylphosphatase 1. erythrocyte (common) type                                              | 5.44           | 0.00           | 1.33          | BRAF                          |
| 1450350_a_at       | Jdp2              | Jun dimerization protein 2                                                                | 5.44           | 0.00           | 1.90          | BRAF; MEK                     |
| 1455697_at         | NA                | NA                                                                                        | 5.43           | 0.00           | 4.02          | BRAF; MEK                     |
| 1429181_at         | 1700009P17Rik     | RIKEN cDNA 1700009P17 gene                                                                | 5.42           | 0.00           | 1.43          | BRAF                          |
| 1440215_at         | OTTMUSG0000004461 | predicted gene. OTTMUSG0000004461                                                         | 5.42           | 0.00           | 1.75          | BRAF; MEK                     |
| 1455376_at         | 1300010F03Rik     | RIKEN cDNA 1300010F03 gene                                                                | 5.42           | 0.00           | 1.26          | BRAF                          |
| 1452194_at         | Tbcd              | tubulin-specific chaperone d                                                              | 5.41           | 0.00           | 1.26          | n.r. ; MEK                    |
| 1455718_at         | Spata21           | spermatogenesis associated 21                                                             | 5.41           | 0.00           | 1.18          | ; MEK                         |
| 1417092_at         | Pthr1             | parathyroid hormone receptor 1                                                            | 5.40           | 0.00           | 2.79          | BRAF                          |
| 1418954_at         | Camkk1            | calcium/calmodulin-dependent protein kinase kinase 1. alpha                               | 5.40           | 0.00           | 1.57          | ; MEK                         |
| 1460566_at         | Mtap1a            | microtubule-associated protein 1 A                                                        | 5.40           | 0.00           | 1.89          | BRAF; MEK                     |
| 1416644_a_at       | Sema3b            | sema domain. immunoglobulin domain (Ig). short basic domain. secreted. (semaphorin) 3B    | 5.40           | 0.00           | 1.48          | BRAF; MEK                     |
| 1419329_at         | Sorbs3            | sorbin and SH3 domain containing 3                                                        | 5.40           | 0.00           | 2.06          |                               |
| 1423341_at         | Cspg4             | chondroitin sulfate proteoglycan 4                                                        | 5.40           | 0.00           | 2.39          | BRAF; MEK                     |
| 1434548_at         | Serinc3           | serine incorporator 3                                                                     | 5.39           | 0.00           | 1.94          | BRAF; MEK                     |
| 1454935_at         | D930001I22Rik     | RIKEN cDNA D930001I22 gene                                                                | 5.39           | 0.00           | 1.41          | ; MEK                         |
| 1428289_at         | 2310051E17Rik     | RIKEN cDNA 2310051E17 gene                                                                | 5.39           | 0.00           | 1.98          | BRAF; MEK                     |
| 1417537_at         | Zmat2             | zinc finger. matrin type 2                                                                | 5.39           | 0.00           | 1.35          | ; MEK                         |
| 1433553_at         | Garnl3            | GTPase activating RANGAP domain-like 3                                                    | 5.38           | 0.00           | 1.46          |                               |
| 1425557_x_at       | Tsc22d3           | TSC22 domain family. member 3                                                             | 5.38           | 0.00           | 1.49          | BRAF; MEK                     |
| 1455258_at         | Kcnc2             | potassium voltage gated channel. Shaw-related subfamily. member 2                         | 5.37           | 0.00           | 2.09          | ; MEK                         |
| 1429115_at         | 2010003O02Rik     | RIKEN cDNA 2010003O02 gene                                                                | 5.37           | 0.00           | 1.60          | ; n.r.                        |
| 1434828_at         | B430201A12Rik     | RIKEN cDNA B430201A12 gene                                                                | 5.37           | 0.00           | 1.59          | BRAF; MEK                     |
| 1452703_at         | Ahcy12            | S-adenosylhomocysteine hydrolase-like 2                                                   | 5.37           | 0.00           | 1.66          | ; MEK                         |
| 1454211_a_at       | Shroom3           | shroom family member 3                                                                    | 5.37           | 0.00           | 1.89          | ; MEK                         |
| 1438534_x_at       | BC004004          | cDNA sequence BC004004                                                                    | 5.37           | 0.00           | 1.30          | BRAF; MEK                     |
| 1449536_at         | Kcnn1             | potassium intermediate/small conductance calcium-activated channel. subfamily N. member 1 | 5.36           | 0.00           | 1.39          | ; MEK                         |
| 1448392_at         | Sparc             | secreted acidic cysteine rich glycoprotein                                                | 5.36           | 0.00           | 1.57          | BRAF; MEK                     |
| 1433808_at         | D330001F17Rik     | RIKEN cDNA D330001F17 gene                                                                | 5.36           | 0.00           | 1.46          | BRAF; MEK                     |
| 1439429_x_at       | Dtx2              | deltex 2 homolog (Drosophila)                                                             | 5.36           | 0.00           | 1.37          | n.r. ;                        |
| 1429365_at         | 1700016M24Rik     | RIKEN cDNA 1700016M24 gene                                                                | 5.36           | 0.00           | 1.94          | BRAF; MEK                     |
| 1448100_at         | 4833439L19Rik     | RIKEN cDNA 4833439L19 gene                                                                | 5.36           | 0.00           | 1.29          | BRAF; MEK                     |
| 1424191_a_at       | Tmem41a           | transmembrane protein 41a                                                                 | 5.36           | 0.00           | 1.36          | ; MEK                         |
| 1425068_a_at       | Tex264            | testis expressed gene 264                                                                 | 5.36           | 0.00           | 2.09          | BRAF; MEK                     |
| 1422654_at         | Sgca              | sarcoglycan. alpha (dystrophin-associated glycoprotein)                                   | 5.36           | 0.00           | 1.64          | BRAF; MEK                     |
| 1424068_at         | Tcta              | T-cell leukemia translocation altered gene                                                | 5.35           | 0.00           | 2.93          | BRAF; MEK                     |
| 1434051_s_at       | Hspa12a           | heat shock protein 12A                                                                    | 5.35           | 0.00           | 1.32          | ; n.r.                        |
| 1453522_at         | 6530401N04Rik     | RIKEN cDNA 6530401N04 gene                                                                | 5.35           | 0.00           | 1.26          | ; MEK                         |
| 1436056_at         | Kif13b            | kinesin family member 13B                                                                 | 5.35           | 0.00           | 1.74          | BRAF; MEK                     |
| 1420430_a_at       | 2510048L02Rik     | RIKEN cDNA 2510048L02 gene                                                                | 5.35           | 0.00           | 1.44          | ; MEK                         |
| 1426272_at         | Lmbr1             | limb region 1                                                                             | 5.34           | 0.00           | 1.95          | BRAF; MEK                     |
| 1433558_at         | Dab2ip            | disabled homolog 2 (Drosophila) interacting protein                                       | 5.34           | 0.00           | 2.00          | BRAF; MEK                     |
| 1418567_a_at       | Srp14             | signal recognition particle 14                                                            | 5.33           | 0.00           | 1.50          | BRAF; MEK                     |
| 1450828_at         | Synpo2            | synaptopodin 2                                                                            | 5.33           | 0.00           | 1.52          | BRAF; MEK                     |

| <b>Probeset ID</b> | <b>Symbol</b> | <b>Gene Name</b>                                                                                              | <b>d-value</b> | <b>q-value</b> | <b>R-fold</b> | <b>Expression reversed by</b> |
|--------------------|---------------|---------------------------------------------------------------------------------------------------------------|----------------|----------------|---------------|-------------------------------|
| 1433723_s_at       | Serf2         | small EDRK-rich factor 2                                                                                      | 5.32           | 0.00           | 2.31          | BRAF; MEK                     |
| 1419376_at         | 1110018M03Rik | RIKEN cDNA 1110018M03 gene                                                                                    | 5.32           | 0.00           | 3.57          | BRAF; MEK                     |
| 1435603_at         | Sned1         | sushi. nidogen and EGF-like domains 1                                                                         | 5.32           | 0.00           | 1.35          | n.r. ; n.r.                   |
| 1451707_s_at       | Slc41a3       | solute carrier family 41. member 3                                                                            | 5.32           | 0.00           | 2.41          | BRAF; MEK                     |
| 1445565_at         | Hist1h1e      | histone cluster 1. H1e                                                                                        | 5.32           | 0.00           | 1.73          | BRAF; MEK                     |
| 1428620_at         | Ensa          | endosulfine alpha                                                                                             | 5.31           | 0.00           | 1.52          |                               |
| 1439113_at         | LOC77114      | similar to development and differentiation enhancing factor 2                                                 | 5.31           | 0.00           | 1.45          | BRAF; MEK                     |
| 1435461_at         | Magi3         | membrane associated guanylate kinase. WW and PDZ domain containing 3                                          | 5.31           | 0.00           | 1.91          | BRAF; n.r.                    |
| 1458562_at         | NA            | NA                                                                                                            | 5.31           | 0.00           | 1.73          | BRAF; MEK                     |
| 1456404_at         | Adamts5       | a disintegrin-like and metallopeptidase (reprolysin type) with thrombospondin type 1 motif. 5 (aggrecanase-2) | 5.31           | 0.00           | 2.63          |                               |
| 1428165_at         | Vps24         | vacuolar protein sorting 24 (yeast)                                                                           | 5.30           | 0.00           | 1.62          | ; MEK                         |
| 1460559_at         | Kank2         | KN motif and ankyrin repeat domains 2                                                                         | 5.30           | 0.00           | 1.57          | BRAF                          |
| 1448063_at         | Iqsec2        | IQ motif and Sec7 domain 2                                                                                    | 5.30           | 0.00           | 1.60          | BRAF                          |
| 1443952_at         | NA            | NA                                                                                                            | 5.29           | 0.00           | 1.70          | BRAF; MEK                     |
| 1426802_at         | Sept8         | septin 8                                                                                                      | 5.29           | 0.00           | 1.64          | BRAF; MEK                     |
| 1435522_a_at       | 2310016E02Rik | RIKEN cDNA 2310016E02 gene                                                                                    | 5.29           | 0.00           | 1.48          | BRAF                          |
| 1426816_at         | Ccdc64        | coiled-coil domain containing 64                                                                              | 5.29           | 0.00           | 1.65          | BRAF; MEK                     |
| 1427012_at         | Lancl1        | LanC (bacterial lantibiotic synthetase component C)-like 1                                                    | 5.29           | 0.00           | 1.47          |                               |
| 1429722_at         | Zbtb4         | zinc finger and BTB domain containing 4                                                                       | 5.29           | 0.00           | 2.21          | BRAF; MEK                     |
| 1434263_at         | F630110N24Rik | RIKEN cDNA F630110N24 gene                                                                                    | 5.28           | 0.00           | 1.64          | BRAF                          |
| 1428427_at         | Fbxl2         | F-box and leucine-rich repeat protein 2                                                                       | 5.28           | 0.00           | 3.19          | BRAF; MEK                     |
| 1418455_at         | Copz2         | coatamer protein complex. subunit zeta 2                                                                      | 5.28           | 0.00           | 1.92          | BRAF; MEK                     |
| 1452667_at         | Rab2b         | RAB2B. member RAS oncogene family                                                                             | 5.27           | 0.00           | 1.98          | BRAF; MEK                     |
| 1427405_s_at       | Rab11fip5     | RAB11 family interacting protein 5 (class I)                                                                  | 5.27           | 0.00           | 1.72          |                               |
| 1419814_s_at       | S100a1        | S100 calcium binding protein A1                                                                               | 5.27           | 0.00           | 2.05          | BRAF                          |
| 1419869_s_at       | Hdlbp         | high density lipoprotein (HDL) binding protein                                                                | 5.26           | 0.00           | 1.40          | ; n.r.                        |
| 1417105_at         | Trappc2l      | trafficking protein particle complex 2-like                                                                   | 5.26           | 0.00           | 1.66          | BRAF; MEK                     |
| 1449412_at         | 1810046J19Rik | RIKEN cDNA 1810046J19 gene                                                                                    | 5.26           | 0.00           | 1.95          | BRAF; MEK                     |
| 1434354_at         | Maob          | monoamine oxidase B                                                                                           | 5.26           | 0.00           | 3.76          | BRAF; MEK                     |
| 1427155_at         | Rell2         | RELT-like 2                                                                                                   | 5.26           | 0.00           | 1.43          | BRAF                          |
| 1418838_at         | Abcd1         | ATP-binding cassette. sub-family D (ALD). member 1                                                            | 5.26           | 0.00           | 1.35          | BRAF                          |
| 1434050_at         | Vps8          | vacuolar protein sorting 8 homolog (S. cerevisiae)                                                            | 5.25           | 0.00           | 1.57          | BRAF; MEK                     |
| 1455385_at         | Sh3glb1       | SH3-domain GRB2-like B1 (endophilin)                                                                          | 5.25           | 0.00           | 1.61          | ; MEK                         |
| 1424411_at         | Tmem189       | transmembrane protein 189                                                                                     | 5.25           | 0.00           | 1.74          | BRAF; MEK                     |
| 1428067_at         | Rasl12        | RAS-like. family 12                                                                                           | 5.25           | 0.00           | 3.12          | BRAF; MEK                     |
| 1421989_s_at       | Papss2        | 3'-phosphoadenosine 5'-phosphosulfate synthase 2                                                              | 5.25           | 0.00           | 3.45          | BRAF; MEK                     |
| 1422550_a_at       | Mtap6         | microtubule-associated protein 6                                                                              | 5.23           | 0.00           | 1.58          | BRAF; MEK                     |
| 1422644_at         | Sh3bgr        | SH3-binding domain glutamic acid-rich protein                                                                 | 5.23           | 0.00           | 2.36          | BRAF; MEK                     |
| 1455295_at         | Slc38a7       | solute carrier family 38. member 7                                                                            | 5.23           | 0.00           | 1.55          | ; MEK                         |
| 1427442_a_at       | App           | amyloid beta (A4) precursor protein                                                                           | 5.23           | 0.00           | 1.31          | BRAF; MEK                     |
| 1431167_at         | Dgkg          | diacylglycerol kinase. gamma                                                                                  | 5.23           | 0.00           | 2.09          | BRAF; MEK                     |
| 1441263_a_at       | A930005H10Rik | RIKEN cDNA A930005H10 gene                                                                                    | 5.22           | 0.00           | 1.42          | ; n.r.                        |
| 1433740_at         | Tmem87b       | transmembrane protein 87B                                                                                     | 5.22           | 0.00           | 1.45          | BRAF; MEK                     |
| 1457097_at         | Skap2         | src family associated phosphoprotein 2                                                                        | 5.22           | 0.00           | 1.72          | BRAF; MEK                     |
| 1435109_at         | Tmem175       | transmembrane protein 175                                                                                     | 5.22           | 0.00           | 1.66          | BRAF; MEK                     |
| 1418448_at         | Rras          | Harvey rat sarcoma oncogene. subgroup R                                                                       | 5.21           | 0.00           | 1.57          | BRAF; MEK                     |
| 1458306_at         | Pigz          | phosphatidylinositol glycan anchor biosynthesis. class Z                                                      | 5.21           | 0.00           | 1.26          | ; MEK                         |
| 1415721_a_at       | 1200013P24Rik | RIKEN cDNA 1200013P24 gene                                                                                    | 5.21           | 0.00           | 1.57          | BRAF; MEK                     |
| 1424434_at         | BC024814      | cDNA sequence BC024814                                                                                        | 5.21           | 0.00           | 1.55          | ; MEK                         |
| 1428014_at         | Hist1h4h      | histone cluster 1. H4h                                                                                        | 5.21           | 0.00           | 3.59          | BRAF; MEK                     |
| 1427168_a_at       | Col14a1       | collagen. type XIV. alpha 1                                                                                   | 5.20           | 0.00           | 13.58         | BRAF; MEK                     |
| 1423164_at         | Gpr137b-ps    | G protein-coupled receptor 137B. pseudogene                                                                   | 5.20           | 0.00           | 1.88          | ; MEK                         |
| 1428357_at         | 2610019F03Rik | RIKEN cDNA 2610019F03 gene                                                                                    | 5.20           | 0.00           | 2.60          | BRAF; MEK                     |
| 1434952_at         | Cox4nb        | COX4 neighbor                                                                                                 | 5.20           | 0.00           | 1.61          |                               |
| 1425980_at         | Wdr54         | WD repeat domain 54                                                                                           | 5.20           | 0.00           | 1.26          | BRAF; MEK                     |

| <b>Probeset ID</b> | <b>Symbol</b> | <b>Gene Name</b>                                                      | <b>d-value</b> | <b>q-value</b> | <b>R-fold</b> | <b>Expression reversed by</b> |
|--------------------|---------------|-----------------------------------------------------------------------|----------------|----------------|---------------|-------------------------------|
| 1448613_at         | Ecm1          | extracellular matrix protein 1                                        | 5.19           | 0.00           | 2.69          | BRAF; MEK                     |
| 1437902_s_at       | Rarres2       | retinoic acid receptor responder (tazarotene induced) 2               | 5.19           | 0.00           | 1.27          | BRAF; MEK                     |
| 1425281_a_at       | Tsc22d3       | TSC22 domain family, member 3                                         | 5.19           | 0.00           | 3.24          | BRAF; MEK                     |
| 1452615_s_at       | Trpt1         | tRNA phosphotransferase 1                                             | 5.19           | 0.00           | 1.64          | BRAF; MEK                     |
| 1416937_at         | Gabarpap      | gamma-aminobutyric acid receptor associated protein                   | 5.19           | 0.00           | 1.66          | BRAF; MEK                     |
| 1451594_s_at       | Serpib6c      | serine (or cysteine) peptidase inhibitor, clade B, member 6c          | 5.19           | 0.00           | 1.35          | BRAF; MEK                     |
| 1435714_x_at       | Il17d         | interleukin 17D                                                       | 5.18           | 0.00           | 2.22          | BRAF; MEK                     |
| 1453377_at         | Sh2d4a        | SH2 domain containing 4A                                              | 5.17           | 0.00           | 7.17          | ; MEK                         |
| 1434307_at         | Tmem64        | transmembrane protein 64                                              | 5.17           | 0.00           | 1.61          | BRAF; MEK                     |
| 1444270_at         | Rshl3         | radial spokehead-like 3                                               | 5.17           | 0.00           | 1.24          | ; MEK                         |
| 1417963_at         | Pltp          | phospholipid transfer protein                                         | 5.17           | 0.00           | 4.06          |                               |
| 1443872_at         | NA            | NA                                                                    | 5.16           | 0.00           | 1.76          | BRAF; MEK                     |
| 1441952_x_at       | Lynx1         | Ly6/neurotoxin 1                                                      | 5.16           | 0.00           | 2.71          | BRAF; MEK                     |
| 1416768_at         | 1110003E01Rik | RIKEN cDNA 1110003E01 gene                                            | 5.15           | 0.00           | 1.84          | BRAF; MEK                     |
| 1417383_at         | Entpd5        | ectonucleoside triphosphate diphosphohydrolase 5                      | 5.14           | 0.00           | 1.45          | BRAF; MEK                     |
| 1425201_a_at       | Hyi           | hydroxypyruvate isomerase homolog (E. coli)                           | 5.14           | 0.00           | 1.58          |                               |
| 1441948_x_at       | Zfand3        | zinc finger, AN1-type domain 3                                        | 5.14           | 0.00           | 1.72          | BRAF; MEK                     |
| 1441376_at         | Gabarpap2     | gamma-aminobutyric acid (GABA-A) receptor-associated protein-like 2   | 5.14           | 0.00           | 1.63          | n.r. ; MEK                    |
| 1451747_a_at       | Atg12         | autophagy-related 12 (yeast)                                          | 5.13           | 0.00           | 1.86          | BRAF; MEK                     |
| 1420124_s_at       | Tcta          | T-cell leukemia translocation altered gene                            | 5.13           | 0.00           | 3.21          | BRAF; MEK                     |
| 1438006_at         | 4933439F18Rik | RIKEN cDNA 4933439F18 gene                                            | 5.12           | 0.00           | 1.57          | BRAF; MEK                     |
| 1423707_at         | Tmem50b       | transmembrane protein 50B                                             | 5.12           | 0.00           | 1.54          | BRAF; MEK                     |
| 1451970_at         | Daglb         | diacylglycerol lipase, beta                                           | 5.12           | 0.00           | 1.97          | BRAF; MEK                     |
| 1424746_at         | Kif1c         | kinesin family member 1C                                              | 5.12           | 0.00           | 1.84          | ; MEK                         |
| 1420123_at         | Tcta          | T-cell leukemia translocation altered gene                            | 5.12           | 0.00           | 3.20          | BRAF; MEK                     |
| 1417857_at         | Mmaa          | methylmalonic aciduria (cobalamin deficiency) type A                  | 5.12           | 0.00           | 1.64          | BRAF; MEK                     |
| 1431774_a_at       | Lym1          | LYR motif containing 1                                                | 5.12           | 0.00           | 1.66          | BRAF; MEK                     |
| 1426288_at         | Lrp4          | low density lipoprotein receptor-related protein 4                    | 5.12           | 0.00           | 1.56          | ; n.r.                        |
| 1435089_at         | 201011101Rik  | RIKEN cDNA 201011101 gene                                             | 5.11           | 0.00           | 1.93          | BRAF; MEK                     |
| 1460343_at         | Neurl         | neuralized-like homolog (Drosophila)                                  | 5.11           | 0.00           | 1.67          | BRAF                          |
| 1418568_x_at       | Srp14         | signal recognition particle 14                                        | 5.11           | 0.00           | 1.44          | BRAF; MEK                     |
| 1434169_at         | 9030409G11Rik | RIKEN cDNA 9030409G11 gene                                            | 5.11           | 0.00           | 1.67          | BRAF; MEK                     |
| 1417626_at         | Pde4dip       | phosphodiesterase 4D interacting protein (myomegalin)                 | 5.11           | 0.00           | 3.02          | BRAF; MEK                     |
| 1416688_at         | Snap91        | synaptosomal-associated protein 91                                    | 5.10           | 0.00           | 2.54          |                               |
| 1426711_at         | Tmco3         | transmembrane and coiled-coil domains 3                               | 5.10           | 0.00           | 1.80          | BRAF; MEK                     |
| 1428115_a_at       | Rab2b         | RAB2B, member RAS oncogene family                                     | 5.10           | 0.00           | 2.01          | BRAF; MEK                     |
| 1436752_at         | Tbccd1        | TBCC domain containing 1                                              | 5.10           | 0.00           | 1.78          | BRAF; MEK                     |
| 1433605_at         | Inpp5a        | inositol polyphosphate-5-phosphatase A                                | 5.10           | 0.00           | 1.85          | BRAF; MEK                     |
| 1452668_x_at       | Rab2b         | RAB2B, member RAS oncogene family                                     | 5.10           | 0.00           | 1.96          | BRAF; MEK                     |
| 1421998_at         | Tor3a         | torsin family 3, member A                                             | 5.09           | 0.00           | 2.25          | BRAF; MEK                     |
| 1451132_at         | Pbxip1        | pre-B-cell leukemia transcription factor interacting protein 1        | 5.09           | 0.00           | 1.66          | BRAF; MEK                     |
| 1424309_a_at       | Mocs2         | molybdenum cofactor synthesis 2                                       | 5.09           | 0.00           | 1.46          | BRAF; MEK                     |
| 1436609_a_at       | Lrpap1        | low density lipoprotein receptor-related protein associated protein 1 | 5.09           | 0.00           | 1.73          | BRAF                          |
| 1424927_at         | Glpr1         | GLI pathogenesis-related 1 (glioma)                                   | 5.08           | 0.00           | 3.09          | ; MEK                         |
| 1423868_at         | Txnrd3        | thioredoxin reductase 3                                               | 5.08           | 0.00           | 1.44          | n.r. ; MEK                    |
| 1454075_s_at       | Nudt13        | nudix (nucleoside diphosphate linked moiety X)-type motif 13          | 5.08           | 0.00           | 1.30          | BRAF; n.r.                    |
| 1418704_at         | S100a13       | S100 calcium binding protein A13                                      | 5.07           | 0.00           | 2.35          | BRAF                          |
| 1429583_at         | 2900053A13Rik | RIKEN cDNA 2900053A13 gene                                            | 5.07           | 0.00           | 1.89          | BRAF; MEK                     |
| 1416164_at         | Fbln5         | fibulin 5                                                             | 5.07           | 0.00           | 2.32          | BRAF; MEK                     |
| 1417235_at         | Ehd3          | EH-domain containing 3                                                | 5.07           | 0.00           | 2.08          | BRAF; MEK                     |
| 1420858_at         | Pkia          | protein kinase inhibitor, alpha                                       | 5.07           | 0.00           | 3.05          | BRAF; MEK                     |
| 1417174_at         | Tmem218       | transmembrane protein 218                                             | 5.07           | 0.00           | 1.75          | BRAF                          |
| 1437113_s_at       | Pld1          | phospholipase D1                                                      | 5.06           | 0.00           | 1.41          | BRAF; MEK                     |
| 1449590_a_at       | Mras          | muscle and microspikes RAS                                            | 5.06           | 0.00           | 1.65          | BRAF; MEK                     |
| 1437874_s_at       | Hexb          | hexosaminidase B                                                      | 5.06           | 0.00           | 1.67          | BRAF; MEK                     |
| 1429018_at         | 3830408D24Rik | RIKEN cDNA 3830408D24 gene                                            | 5.06           | 0.00           | 1.68          | BRAF; MEK                     |

| <b>Probeset ID</b> | <b>Symbol</b>     | <b>Gene Name</b>                                                                                                                     | <b>d-value</b> | <b>q-value</b> | <b>R-fold</b> | <b>Expression reversed by</b> |
|--------------------|-------------------|--------------------------------------------------------------------------------------------------------------------------------------|----------------|----------------|---------------|-------------------------------|
| 1415919_at         | Npdc1             | neural proliferation, differentiation and control gene 1                                                                             | 5.06           | 0.00           | 1.82          | BRAF; MEK                     |
| 1427011_a_at       | Lancl1            | LanC (bacterial lantibiotic synthetase component C)-like 1                                                                           | 5.06           | 0.00           | 1.47          | ; MEK                         |
| 1452283_at         | Rassf8            | Ras association (RalGDS/AF-6) domain family (N-terminal) member 8                                                                    | 5.05           | 0.00           | 1.78          | BRAF; MEK                     |
| 1421861_at         | Clstn1            | calsyntenin 1                                                                                                                        | 5.05           | 0.00           | 1.62          | ; n.r.                        |
| 1448181_at         | Klf15             | Kruppel-like factor 15                                                                                                               | 5.05           | 0.00           | 1.37          | BRAF; MEK                     |
| 1436325_at         | Rora              | RAR-related orphan receptor alpha                                                                                                    | 5.05           | 0.00           | 2.71          | BRAF; MEK                     |
| 1415749_a_at       | Rragc             | Ras-related GTP binding C                                                                                                            | 5.05           | 0.00           | 1.43          | BRAF; MEK                     |
| 1435646_at         | Ikbg              | inhibitor of kappaB kinase gamma                                                                                                     | 5.05           | 0.00           | 1.68          | ; MEK                         |
| 1428327_at         | Trak1             | trafficking protein, kinesin binding 1                                                                                               | 5.05           | 0.00           | 1.30          | n.r. ;                        |
| 1435902_at         | Nudt18            | nudix (nucleoside diphosphate linked moiety X)-type motif 18                                                                         | 5.05           | 0.00           | 2.45          | BRAF; MEK                     |
| 1424219_at         | ENSMUSG0000054212 | predicted gene, ENSMUSG0000054212                                                                                                    | 5.04           | 0.00           | 1.69          | ; MEK                         |
| 1454824_s_at       | Mtss1             | mitochondrial tumor suppressor 1                                                                                                     | 5.04           | 0.00           | 2.15          | BRAF; MEK                     |
| 1424126_at         | Alas1             | aminolevulinic acid synthase 1                                                                                                       | 5.04           | 0.00           | 1.78          | BRAF; MEK                     |
| 1417169_at         | Usp2              | ubiquitin specific peptidase 2                                                                                                       | 5.04           | 0.00           | 1.38          |                               |
| 1416430_at         | Cat               | catalase                                                                                                                             | 5.04           | 0.00           | 1.39          | BRAF; MEK                     |
| 1434864_at         | Nipa1             | non imprinted in Prader-Willi/Angelman syndrome 1 homolog (human)                                                                    | 5.03           | 0.00           | 1.37          | BRAF; MEK                     |
| 1418104_at         | Nrip3             | nuclear receptor interacting protein 3                                                                                               | 5.03           | 0.00           | 3.29          | BRAF; MEK                     |
| 1428057_a_at       | Ahna1             | AHNAK nucleoprotein (desmoyokin)                                                                                                     | 5.03           | 0.00           | 2.41          | ; MEK                         |
| 1426522_at         | Hadhb             | hydroxyacyl-Coenzyme A dehydrogenase/3-ketoacyl-Coenzyme A thiolase/enoyl-Coenzyme A hydratase (trifunctional protein), beta subunit | 5.03           | 0.00           | 1.46          | BRAF; MEK                     |
| 1428854_at         | Tmed8             | transmembrane emp24 domain containing 8                                                                                              | 5.02           | 0.00           | 1.38          | BRAF; MEK                     |
| 1424477_at         | Tmem184a          | transmembrane protein 184a                                                                                                           | 5.02           | 0.00           | 2.98          | BRAF; MEK                     |
| 1433670_at         | Emp2              | epithelial membrane protein 2                                                                                                        | 5.02           | 0.00           | 1.67          | ; MEK                         |
| 1423865_at         | Slc44a1           | solute carrier family 44, member 1                                                                                                   | 5.02           | 0.00           | 1.53          | n.r. ;                        |
| 1417707_at         | N4bp2l1           | NEDD4 binding protein 2-like 1                                                                                                       | 5.02           | 0.00           | 1.36          | BRAF; n.r.                    |
| 1417316_at         | Them2             | thioesterase superfamily member 2                                                                                                    | 5.02           | 0.00           | 1.62          | BRAF; MEK                     |
| 1451339_at         | Suox              | sulfite oxidase                                                                                                                      | 5.02           | 0.00           | 1.63          | BRAF; MEK                     |
| 1419208_at         | Map3k8            | mitogen-activated protein kinase kinase kinase 8                                                                                     | 5.01           | 0.00           | 1.43          |                               |
| 1453855_at         | Mxra7             | matrix-remodelling associated 7                                                                                                      | 5.01           | 0.00           | 1.92          | BRAF; MEK                     |
| 1459895_at         | Ppp4r1l           | protein phosphatase 4, regulatory subunit 1-like                                                                                     | 5.01           | 0.00           | 1.45          | ; n.r.                        |
| 1430538_at         | 2210013O21Rik     | RIKEN cDNA 2210013O21 gene                                                                                                           | 5.01           | 0.00           | 1.80          | BRAF; MEK                     |
| 1456500_at         | Aph1b             | anterior pharynx defective 1b homolog (C. elegans)                                                                                   | 5.01           | 0.00           | 1.81          | BRAF; MEK                     |
| 1417614_at         | Ckm               | creatine kinase, muscle                                                                                                              | 5.00           | 0.00           | 1.26          | BRAF; MEK                     |
| 1455126_x_at       | 2310028O11Rik     | RIKEN cDNA 2310028O11 gene                                                                                                           | 5.00           | 0.00           | 1.35          | BRAF                          |
| 1426937_at         | 6330406115Rik     | RIKEN cDNA 6330406115 gene                                                                                                           | 5.00           | 0.00           | 9.58          | ; n.r.                        |
| 1417809_at         | Slc22a18          | solute carrier family 22 (organic cation transporter), member 18                                                                     | 5.00           | 0.00           | 1.56          | BRAF; MEK                     |
| 1418302_at         | Ppt2              | palmitoyl-protein thioesterase 2                                                                                                     | 4.99           | 0.00           | 1.46          | ; MEK                         |
| 1441937_s_at       | LOC100047214      | similar to PTEN induced putative kinase 1                                                                                            | 4.99           | 0.00           | 2.96          | BRAF                          |
| 1448137_at         | Aldh7a1           | aldehyde dehydrogenase family 7, member A1                                                                                           | 4.99           | 0.00           | 1.41          | ; MEK                         |
| 1416409_at         | Acox1             | acyl-Coenzyme A oxidase 1, palmitoyl                                                                                                 | 4.99           | 0.00           | 1.77          | BRAF; MEK                     |
| 1422549_at         | Arl2              | ADP-ribosylation factor-like 2                                                                                                       | 4.99           | 0.00           | 1.59          | BRAF; MEK                     |
| 1436339_at         | 1810058I24Rik     | RIKEN cDNA 1810058I24 gene                                                                                                           | 4.99           | 0.00           | 1.54          | BRAF; MEK                     |
| 1421987_at         | Paps2             | 3'-phosphoadenosine 5'-phosphosulfate synthase 2                                                                                     | 4.98           | 0.00           | 2.45          | BRAF; MEK                     |
| 1449152_at         | Cdkn2b            | cyclin-dependent kinase inhibitor 2B (p15, inhibits CDK4)                                                                            | 4.98           | 0.00           | 4.03 *        | BRAF; n.r.                    |
| 1418294_at         | Epb4.114b         | erythrocyte protein band 4.1-like 4b                                                                                                 | 4.98           | 0.00           | 1.63          |                               |
| 1449751_at         | Slc6a6            | solute carrier family 6 (neurotransmitter transporter, taurine), member 6                                                            | 4.98           | 0.00           | 1.62          | BRAF; MEK                     |
| 1415745_a_at       | Dscr3             | Down syndrome critical region gene 3                                                                                                 | 4.98           | 0.00           | 1.42          | BRAF; MEK                     |
| 1424888_at         | March2            | membrane-associated ring finger (C3HC4) 2                                                                                            | 4.98           | 0.00           | 1.72          | BRAF; MEK                     |
| 1420508_at         | Sema3f            | sema domain, immunoglobulin domain (Ig), short basic domain, secreted, (semaphorin) 3F                                               | 4.98           | 0.00           | 1.53          | BRAF; MEK                     |
| 1439490_at         | Nr2c1             | nuclear receptor subfamily 2, group C, member 1                                                                                      | 4.98           | 0.00           | 1.36          |                               |
| 1434945_at         | Lpcat2            | lysophosphatidylcholine acyltransferase 2                                                                                            | 4.97           | 0.00           | 2.36          | ; MEK                         |
| 1448418_s_at       | Wdr23             | WD repeat domain 23                                                                                                                  | 4.97           | 0.00           | 1.58          | ; MEK                         |
| 1457373_at         | NA                | NA                                                                                                                                   | 4.97           | 0.00           | 1.16          | BRAF; MEK                     |
| 1455779_at         | Mtap1a            | microtubule-associated protein 1 A                                                                                                   | 4.97           | 0.00           | 2.49          | BRAF; MEK                     |



| <b>Probeset ID</b> | <b>Symbol</b> | <b>Gene Name</b>                                                                                                | <b>d-value</b> | <b>q-value</b> | <b>R-fold</b> | <b>Expression reversed by</b> |
|--------------------|---------------|-----------------------------------------------------------------------------------------------------------------|----------------|----------------|---------------|-------------------------------|
| 1423736_a_at       | Dym           | dymeclin                                                                                                        | 4.97           | 0.00           | 1.58          | BRAF; MEK                     |
| 1423173_at         | Napb          | N-ethylmaleimide sensitive fusion protein attachment protein beta                                               | 4.96           | 0.00           | 1.42          | BRAF                          |
| 1457021_x_at       | Amhr2         | anti-Mullerian hormone type 2 receptor                                                                          | 4.96           | 0.00           | 2.33          | ; MEK                         |
| 1421209_s_at       | Ikkg          | inhibitor of kappaB kinase gamma                                                                                | 4.96           | 0.00           | 1.50          | ; MEK                         |
| 1416934_at         | Mtm1          | X-linked myotubular myopathy gene 1                                                                             | 4.96           | 0.00           | 1.75          | BRAF; MEK                     |
| 1434439_at         | Gsk3b         | glycogen synthase kinase 3 beta                                                                                 | 4.95           | 0.00           | 2.06          | BRAF; MEK                     |
| 1426981_at         | Pcsk6         | proprotein convertase subtilisin/kexin type 6                                                                   | 4.95           | 0.00           | 2.51          | BRAF; MEK                     |
| 1425327_at         | BC008163      | cDNA sequence BC008163                                                                                          | 4.95           | 0.00           | 1.49          | BRAF; MEK                     |
| 1453324_at         | 6330509M23Rik | RIKEN cDNA 6330509M23 gene                                                                                      | 4.95           | 0.00           | 1.71          | n.r. ;                        |
| 1450454_at         | Tor3a         | torsin family 3. member A                                                                                       | 4.95           | 0.00           | 2.31          | BRAF; MEK                     |
| 1422561_at         | Adamts5       | a disintegrin-like and metalloproteinase (reprolysins type) with thrombospondin type 1 motif. 5 (aggrecanase-2) | 4.95           | 0.00           | 2.61          | ; MEK                         |
| 1444507_at         | Usp53         | ubiquitin specific peptidase 53                                                                                 | 4.95           | 0.00           | 2.73          | BRAF; MEK                     |
| 1434313_at         | Ccdc126       | coiled-coil domain containing 126                                                                               | 4.94           | 0.00           | 2.21          | BRAF; MEK                     |
| 1436514_at         | Gpc4          | glypican 4                                                                                                      | 4.94           | 0.00           | 1.70          | BRAF; MEK                     |
| 1415911_at         | Impact        | imprinted and ancient                                                                                           | 4.94           | 0.00           | 2.10          | BRAF; MEK                     |
| 1422107_at         | 2410066E13Rik | RIKEN cDNA 2410066E13 gene                                                                                      | 4.94           | 0.00           | 1.55          | BRAF; MEK                     |
| 1419999_at         | Igfbp1        | immunoglobulin (CD79A) binding protein 1                                                                        | 4.93           | 0.00           | 1.79          | BRAF; MEK                     |
| 1450474_at         | Serpinc9      | serine (or cysteine) peptidase inhibitor. clade B. member 9c                                                    | 4.93           | 0.00           | 1.43          | BRAF; MEK                     |
| 1434593_at         | Eif5a2        | eukaryotic translation initiation factor 5A2                                                                    | 4.93           | 0.00           | 1.48          | BRAF; MEK                     |
| 1446466_at         | NA            | NA                                                                                                              | 4.93           | 0.00           | 1.22          |                               |
| 1428736_at         | Gramd3        | GRAM domain containing 3                                                                                        | 4.93           | 0.00           | 1.93          | BRAF; MEK                     |
| 1433454_at         | Abtb2         | ankyrin repeat and BTB (POZ) domain containing 2                                                                | 4.93           | 0.00           | 1.72          | BRAF                          |
| 1423776_s_at       | Tbc1d22a      | TBC1 domain family. member 22a                                                                                  | 4.93           | 0.00           | 1.33          | ; n.r.                        |
| 1449324_at         | Ero1l         | ERO1-like (S. cerevisiae)                                                                                       | 4.93           | 0.00           | 1.84          | BRAF; MEK                     |
| 1448875_at         | Zhx1          | zinc fingers and homeoboxes 1                                                                                   | 4.93           | 0.00           | 1.58          | ; n.r.                        |
| 1447346_s_at       | 5530400B01Rik | RIKEN cDNA 5530400B01 gene                                                                                      | 4.93           | 0.00           | 1.51          | BRAF; MEK                     |
| 1451550_at         | Ephb3         | Eph receptor B3                                                                                                 | 4.93           | 0.00           | 2.00          | BRAF; MEK                     |
| 1416023_at         | Fabp3         | fatty acid binding protein 3. muscle and heart                                                                  | 4.93           | 0.00           | 5.05          | BRAF; MEK                     |
| 1417607_at         | Cox6a2        | cytochrome c oxidase. subunit VI a. polypeptide 2                                                               | 4.93           | 0.00           | 1.79          | BRAF; MEK                     |
| 1417116_at         | Slc6a8        | solute carrier family 6 (neurotransmitter transporter. creatine). member 8                                      | 4.93           | 0.00           | 1.67          | BRAF; MEK                     |
| 1434089_at         | Synpo         | synaptopodin                                                                                                    | 4.92           | 0.00           | 4.13          | BRAF                          |
| 1456867_x_at       | Ergic3        | ERGIC and golgi 3                                                                                               | 4.92           | 0.00           | 1.26          |                               |
| 1416769_s_at       | Atp6v0b       | ATPase. H+ transporting. lysosomal V0 subunit B                                                                 | 4.91           | 0.00           | 1.91          | BRAF; MEK                     |
| 1434581_at         | 2410066E13Rik | RIKEN cDNA 2410066E13 gene                                                                                      | 4.91           | 0.00           | 2.23          |                               |
| 1415853_at         | Def8          | differentially expressed in FDCP 8                                                                              | 4.90           | 0.00           | 1.47          | ; MEK                         |
| 1449351_s_at       | Pdgfc         | platelet-derived growth factor. C polypeptide                                                                   | 4.90           | 0.00           | 1.57          | BRAF; MEK                     |
| 1418194_at         | Galnt10       | UDP-N-acetyl-alpha-D-galactosamine:polypeptide N-acetylgalactosaminyltransferase 10                             | 4.90           | 0.00           | 1.84          | BRAF; MEK                     |
| 1457435_x_at       | Myom2         | myomesin 2                                                                                                      | 4.90           | 0.00           | 2.46          | BRAF; MEK                     |
| 1427040_at         | Mdfic         | MyoD family inhibitor domain containing                                                                         | 4.90           | 0.00           | 1.79          | BRAF; MEK                     |
| 1426647_at         | 9130011J15Rik | RIKEN cDNA 9130011J15 gene                                                                                      | 4.90           | 0.00           | 1.71          | BRAF; MEK                     |
| 1419665_a_at       | Nupr1         | nuclear protein 1                                                                                               | 4.90           | 0.00           | 3.13          | BRAF; MEK                     |
| 1449575_a_at       | Gstp1         | glutathione S-transferase. pi 1                                                                                 | 4.90           | 0.00           | 1.25          | ; n.r.                        |
| 1453266_at         | Zbtb4         | zinc finger and BTB domain containing 4                                                                         | 4.90           | 0.00           | 2.07          | BRAF; MEK                     |
| 1450107_a_at       | Renbp         | renin binding protein                                                                                           | 4.89           | 0.00           | 1.91          | ; MEK                         |
| 1431190_x_at       | Fahd2a        | fumarylacetoacetate hydrolase domain containing 2A                                                              | 4.89           | 0.00           | 1.24          | ; MEK                         |
| 1422989_a_at       | Dmpk          | dystrophin myotonic-protein kinase                                                                              | 4.89           | 0.00           | 2.07          | BRAF; MEK                     |
| 1449772_at         | Tbc1d14       | TBC1 domain family. member 14                                                                                   | 4.88           | 0.00           | 1.18          |                               |
| 1424186_at         | Ccdc80        | coiled-coil domain containing 80                                                                                | 4.88           | 0.00           | 3.80          | BRAF; MEK                     |
| 1416340_a_at       | Man2b1        | mannosidase 2. alpha B1                                                                                         | 4.88           | 0.00           | 1.45          | ; MEK                         |
| 1448546_at         | Rassf3        | Ras association (RalGDS/AF-6) domain family member 3                                                            | 4.88           | 0.00           | 2.67          | BRAF; MEK                     |
| 1449181_at         | Fech          | ferrochelatase                                                                                                  | 4.87           | 0.00           | 1.59          | BRAF; MEK                     |
| 1459151_x_at       | Irf35         | interferon-induced protein 35                                                                                   | 4.87           | 0.00           | 1.44          | BRAF; MEK                     |
| 1425790_a_at       | Grik2         | glutamate receptor. ionotropic. kainate 2 (beta 2)                                                              | 4.85           | 0.00           | 1.21          |                               |
| 1417879_at         | Nenf          | neuron derived neurotrophic factor                                                                              | 4.85           | 0.00           | 1.58          | BRAF; MEK                     |

| <b>Probeset ID</b> | <b>Symbol</b> | <b>Gene Name</b>                                                      | <b>d-value</b> | <b>q-value</b> | <b>R-fold</b> | <b>Expression reversed by</b> |
|--------------------|---------------|-----------------------------------------------------------------------|----------------|----------------|---------------|-------------------------------|
| 1426460_a_at       | Ugp2          | UDP-glucose pyrophosphorylase 2                                       | 4.85           | 0.00           | 2.23          | BRAF; MEK                     |
| 1452212_at         | Lmna          | lamin A                                                               | 4.84           | 0.00           | 1.20          | ; MEK                         |
| 1423210_a_at       | Nola3         | nucleolar protein family A. member 3                                  | 4.84           | 0.00           | 1.29          | n.r. ;                        |
| 1426696_at         | Lrpap1        | low density lipoprotein receptor-related protein associated protein 1 | 4.84           | 0.00           | 1.74          | BRAF                          |
| 1434961_at         | Asb1          | ankyrin repeat and SOCS box-containing 1                              | 4.84           | 0.00           | 1.90          | BRAF; MEK                     |
| 1451810_at         | ORF63         | open reading frame 63                                                 | 4.84           | 0.00           | 2.36          | BRAF; MEK                     |
| 1427201_at         | Mustn1        | musculoskeletal. embryonic nuclear protein 1                          | 4.84           | 0.00           | 3.17          | BRAF; MEK                     |
| 1435697_a_at       | Cytip         | cytohesin 1 interacting protein                                       | 4.83           | 0.00           | 12.01         |                               |
| 1435472_at         | Kremen1       | kringle containing transmembrane protein 1                            | 4.83           | 0.00           | 1.58          | BRAF; MEK                     |
| 1429453_a_at       | Mrpl55        | mitochondrial ribosomal protein L55                                   | 4.83           | 0.00           | 1.24          | ; MEK                         |
| 1436011_at         | Elmo2         | engulfment and cell motility 2. ced-12 homolog (C. elegans)           | 4.83           | 0.00           | 1.42          | BRAF; MEK                     |
| 1424503_at         | Rab22a        | RAB22A. member RAS oncogene family                                    | 4.82           | 0.00           | 1.38          | BRAF                          |
| 1416654_at         | Slc31a2       | solute carrier family 31. member 2                                    | 4.82           | 0.00           | 1.99          | BRAF; MEK                     |
| 1436040_at         | LOC100039864  | hypothetical protein LOC100039864                                     | 4.82           | 0.00           | 2.42          | BRAF; MEK                     |
| 1452783_at         | Fndc3b        | fibronectin type III domain containing 3B                             | 4.82           | 0.00           | 1.76          | BRAF; MEK                     |
| 1455466_at         | Gpr133        | G protein-coupled receptor 133                                        | 4.82           | 0.00           | 1.65          |                               |
| 1419019_a_at       | Akap4         | A kinase (PRKA) anchor protein 4                                      | 4.82           | 0.00           | 1.22          |                               |
| 1459931_a_at       | NA            | NA                                                                    | 4.82           | 0.00           | 1.27          | BRAF                          |
| 1428739_at         | 2310040A07Rik | RIKEN cDNA 2310040A07 gene                                            | 4.82           | 0.00           | 2.44          | BRAF; MEK                     |
| 1460285_at         | Itga9         | integrin alpha 9                                                      | 4.82           | 0.00           | 1.54          | BRAF                          |
| 1415982_at         | Herpud2       | HERPUD family member 2                                                | 4.81           | 0.00           | 1.55          | BRAF; MEK                     |
| 1417071_s_at       | Cyp4v3        | cytochrome P450. family 4. subfamily v. polypeptide 3                 | 4.81           | 0.00           | 1.91          |                               |
| 1417846_at         | Ulk2          | Unc-51 like kinase 2 (C. elegans)                                     | 4.81           | 0.00           | 1.61          | BRAF; MEK                     |
| 1442371_at         | Lmbr1         | limb region 1                                                         | 4.81           | 0.00           | 1.98          | BRAF; MEK                     |
| 1417480_at         | Fbxo9         | f-box protein 9                                                       | 4.81           | 0.00           | 1.66          | BRAF; MEK                     |
| 1429419_at         | 2310007A19Rik | RIKEN cDNA 2310007A19 gene                                            | 4.81           | 0.00           | 1.45          | BRAF; MEK                     |
| 1422186_s_at       | Cyb5r3        | cytochrome b5 reductase 3                                             | 4.81           | 0.00           | 1.57          | BRAF                          |
| 1428076_s_at       | Ndufb4        | NADH dehydrogenase (ubiquinone) 1 beta subcomplex 4                   | 4.81           | 0.00           | 1.40          | ; MEK                         |
| 1433501_at         | Ctso          | cathepsin O                                                           | 4.80           | 0.00           | 2.00          | BRAF; MEK                     |
| 1420197_at         | Gadd45b       | growth arrest and DNA-damage-inducible 45 beta                        | 4.80           | 0.00           | 1.49          | BRAF; MEK                     |
| 1423328_at         | Gdap1         | ganglioside-induced differentiation-associated-protein 1              | 4.80           | 0.00           | 1.35          | ; MEK                         |
| 1435935_at         | NA            | NA                                                                    | 4.79           | 0.00           | 1.72          | BRAF; MEK                     |
| 1431996_at         | NA            | NA                                                                    | 4.79           | 0.00           | 1.12          |                               |
| 1417492_at         | Ctsb          | cathepsin B                                                           | 4.79           | 0.00           | 1.72          |                               |
| 1434264_at         | Ank2          | ankyrin 2. brain                                                      | 4.79           | 0.00           | 4.04          | BRAF                          |
| 1424654_at         | Acp2          | acid phosphatase 2. lysosomal                                         | 4.79           | 0.00           | 1.36          | BRAF; MEK                     |
| 1419811_at         | Adcy9         | adenylate cyclase 9                                                   | 4.79           | 0.00           | 2.55          | BRAF                          |
| 1450967_at         | Ptplad2       | protein tyrosine phosphatase-like A domain containing 2               | 4.79           | 0.00           | 1.77          | ; n.r.                        |
| 1439529_at         | A430110N23Rik | RIKEN cDNA A430110N23 gene                                            | 4.78           | 0.01           | 1.28          |                               |
| 1452763_at         | Nipa1         | non imprinted in Prader-Willi/Angelman syndrome 1 homolog (human)     | 4.78           | 0.01           | 1.63          | BRAF; MEK                     |
| 1415895_at         | Snrpn         | small nuclear ribonucleoprotein N                                     | 4.78           | 0.01           | 1.29          | BRAF; MEK                     |
| 1439874_at         | 9330102E08Rik | RIKEN cDNA 9330102E08 gene                                            | 4.78           | 0.01           | 1.50          | BRAF; MEK                     |
| 1418081_at         | Dnajc30       | DnaJ (Hsp40) homolog. subfamily C. member 30                          | 4.78           | 0.01           | 1.39          | ; MEK                         |
| 1435008_at         | Slc9a6        | solute carrier family 9 (sodium/hydrogen exchanger). member 6         | 4.77           | 0.01           | 1.43          | BRAF                          |
| 1436188_a_at       | Ndrp4         | N-myc downstream regulated gene 4                                     | 4.77           | 0.01           | 2.78          | BRAF; MEK                     |
| 1455509_at         | AB182283      | cDNA sequence AB182283                                                | 4.77           | 0.01           | 1.44          | BRAF; MEK                     |
| 1457440_at         | Sstr4         | somatostatin receptor 4                                               | 4.77           | 0.01           | 1.22          | ; MEK                         |
| 1431302_a_at       | Nudt7         | nudix (nucleoside diphosphate linked moiety X)-type motif 7           | 4.76           | 0.01           | 1.63          | BRAF; MEK                     |
| 1418583_at         | Hint3         | histidine triad nucleotide binding protein 3                          | 4.76           | 0.01           | 1.40          | BRAF; MEK                     |
| 1434043_a_at       | Repin1        | replication initiator 1                                               | 4.76           | 0.01           | 1.67          | BRAF; n.r.                    |
| 1420614_at         | Dynlt3        | dynein light chain Tctex-type 3                                       | 4.76           | 0.01           | 1.82          | BRAF; MEK                     |
| 1457779_at         | 1110046J04Rik | RIKEN cDNA 1110046J04 gene                                            | 4.76           | 0.01           | 1.55          | ; MEK                         |
| 1419115_at         | Alg14         | asparagine-linked glycosylation 14 homolog (yeast)                    | 4.75           | 0.01           | 1.62          | BRAF; MEK                     |
| 1455291_s_at       | Znrf2         | zinc and ring finger 2                                                | 4.75           | 0.01           | 1.86          | BRAF; MEK                     |
| 1452244_at         | 6330406115Rik | RIKEN cDNA 6330406115 gene                                            | 4.75           | 0.01           | 9.45          | ; n.r.                        |
| 1447556_x_at       | 1700094D03Rik | RIKEN cDNA 1700094D03 gene                                            | 4.75           | 0.01           | 1.26          | BRAF                          |

| <b>Probeset ID</b> | <b>Symbol</b> | <b>Gene Name</b>                                                                              | <b>d-value</b> | <b>q-value</b> | <b>R-fold</b> | <b>Expression reversed by</b> |
|--------------------|---------------|-----------------------------------------------------------------------------------------------|----------------|----------------|---------------|-------------------------------|
| 1417632_at         | Atp6v0a1      | ATPase. H+ transporting. lysosomal V0 subunit A1                                              | 4.75           | 0.01           | 2.02          | BRAF; MEK                     |
| 1445870_at         | NA            | NA                                                                                            | 4.75           | 0.01           | 1.66          |                               |
| 1421129_a_at       | Atp2a3        | ATPase. Ca++ transporting. ubiquitous                                                         | 4.75           | 0.01           | 1.66          | BRAF; MEK                     |
| 1422912_at         | Bmp4          | bone morphogenetic protein 4                                                                  | 4.75           | 0.01           | 3.18          | BRAF; MEK                     |
| 1436195_at         | BC046404      | cDNA sequence BC046404                                                                        | 4.75           | 0.01           | 2.87          |                               |
| 1428962_at         | 1700013F07Rik | RIKEN cDNA 1700013F07 gene                                                                    | 4.74           | 0.01           | 1.28          | ; MEK                         |
| 1456020_at         | Sh3tc2        | SH3 domain and tetratricopeptide repeats 2                                                    | 4.74           | 0.01           | 1.80          | BRAF; MEK                     |
| 1436810_x_at       | 2900010M23Rik | RIKEN cDNA 2900010M23 gene                                                                    | 4.74           | 0.01           | 1.44          | n.r. ;                        |
| 1436297_a_at       | Grina         | glutamate receptor. ionotropic. N-methyl D-aspartate-associated protein 1 (glutamate binding) | 4.74           | 0.01           | 1.92          | BRAF                          |
| 1437617_x_at       | 1110034G24Rik | RIKEN cDNA 1110034G24 gene                                                                    | 4.73           | 0.01           | 1.39          | BRAF; MEK                     |
| 1433976_at         | Reep3         | receptor accessory protein 3                                                                  | 4.73           | 0.01           | 1.50          |                               |
| 1429185_at         | 4631416L12Rik | RIKEN cDNA 4631416L12 gene                                                                    | 4.73           | 0.01           | 1.60          | BRAF; MEK                     |
| 1428312_at         | Lrrc57        | leucine rich repeat containing 57                                                             | 4.72           | 0.01           | 1.55          | BRAF; MEK                     |
| 1448900_at         | D16H22S680E   | DNA segment. Chr 16. human D22S680E. expressed                                                | 4.72           | 0.01           | 1.30          |                               |
| 1436622_at         | lqsec2        | IQ motif and Sec7 domain 2                                                                    | 4.72           | 0.01           | 1.72          | BRAF                          |
| 1425560_a_at       | S100a16       | S100 calcium binding protein A16                                                              | 4.72           | 0.01           | 4.06          | ; MEK                         |
| 1423540_at         | Rbms2         | RNA binding motif. single stranded interacting protein 2                                      | 4.71           | 0.01           | 1.33          | BRAF; MEK                     |
| 1434268_at         | Adar          | adenosine deaminase. RNA-specific                                                             | 4.71           | 0.01           | 1.18          |                               |
| 1418434_at         | Mkrm1         | makorin. ring finger protein. 1                                                               | 4.70           | 0.01           | 1.61          | ; MEK                         |
| 1428270_at         | Glt8d1        | glycosyltransferase 8 domain containing 1                                                     | 4.70           | 0.01           | 1.63          | BRAF; MEK                     |
| 1439981_at         | 5830405N20Rik | RIKEN cDNA 5830405N20 gene                                                                    | 4.70           | 0.01           | 1.20          | ; MEK                         |
| 1423061_at         | Arvcf         | armadillo repeat gene deleted in velo-cardio-facial syndrome                                  | 4.70           | 0.01           | 1.46          |                               |
| 1416481_s_at       | Higd1a        | HIG1 domain family. member 1A                                                                 | 4.70           | 0.01           | 3.04          | BRAF; MEK                     |
| 1417042_at         | Slc37a4       | solute carrier family 37 (glucose-6-phosphate transporter). member 4                          | 4.70           | 0.01           | 1.55          | BRAF; MEK                     |
| 1424741_s_at       | Creb3         | cAMP responsive element binding protein 3                                                     | 4.70           | 0.01           | 1.90          | BRAF; MEK                     |
| 1455630_at         | Dnalcl        | dynein. axonemal. light chain 1                                                               | 4.69           | 0.01           | 1.55          | BRAF; MEK                     |
| 1435504_at         | Clip4         | CAP-GLY domain containing linker protein family. member 4                                     | 4.69           | 0.01           | 2.01          | ; n.r.                        |
| 1448751_at         | Ap3m2         | adaptor-related protein complex 3. mu 2 subunit                                               | 4.69           | 0.01           | 1.89          | BRAF; MEK                     |
| 1418802_at         | R74862        | expressed sequence R74862                                                                     | 4.69           | 0.01           | 1.63          | BRAF; MEK                     |
| 1423613_at         | Ssfa2         | sperm specific antigen 2                                                                      | 4.69           | 0.01           | 1.54          |                               |
| 1422524_at         | Abcb6         | ATP-binding cassette. sub-family B (MDR/TAP). member 6                                        | 4.69           | 0.01           | 1.93          | BRAF; MEK                     |
| 1420488_at         | Mrps14        | mitochondrial ribosomal protein S14                                                           | 4.69           | 0.01           | 1.45          |                               |
| 1438303_at         | Tgfb2         | transforming growth factor. beta 2                                                            | 4.69           | 0.01           | 2.86          | BRAF; MEK                     |
| 1431627_at         | Kif27         | kinesin family member 27                                                                      | 4.68           | 0.01           | 1.20          | BRAF                          |
| 1451379_at         | Rab22a        | RAB22A. member RAS oncogene family                                                            | 4.68           | 0.01           | 1.52          | BRAF; MEK                     |
| 1418474_at         | 1500005A01Rik | RIKEN cDNA 1500005A01 gene                                                                    | 4.68           | 0.01           | 1.63          |                               |
| 1436132_at         | 9830001H06Rik | RIKEN cDNA 9830001H06 gene                                                                    | 4.68           | 0.01           | 1.48          | BRAF; MEK                     |
| 1435464_at         | 1110003E01Rik | RIKEN cDNA 1110003E01 gene                                                                    | 4.68           | 0.01           | 3.04          | BRAF                          |
| 1415776_at         | Aldh3a2       | aldehyde dehydrogenase family 3. subfamily A2                                                 | 4.68           | 0.01           | 1.45          | BRAF; MEK                     |
| 1447936_at         | 2410006H16Rik | RIKEN cDNA 2410006H16 gene                                                                    | 4.67           | 0.01           | 1.94          | ; n.r.                        |
| 1448259_at         | Fstl1         | follicle-stimulating-like 1                                                                   | 4.67           | 0.01           | 1.64          | BRAF; MEK                     |
| 1423671_at         | Dner          | delta/notch-like EGF-related receptor                                                         | 4.67           | 0.01           | 8.17          | BRAF; MEK                     |
| 1451643_a_at       | Rab4b         | RAB4B. member RAS oncogene family                                                             | 4.67           | 0.01           | 1.38          | BRAF; MEK                     |
| 1417659_at         | Vps29         | vacuolar protein sorting 29 (S. pombe)                                                        | 4.67           | 0.01           | 1.44          | BRAF; MEK                     |
| 1427156_s_at       | Ascc2         | activating signal cointegrator 1 complex subunit 2                                            | 4.67           | 0.01           | 1.58          |                               |
| 1428257_s_at       | Dynlrb1       | dynein light chain roadblock-type 1                                                           | 4.67           | 0.01           | 1.35          | BRAF                          |
| 1419548_at         | Kpna1         | karyopherin (importin) alpha 1                                                                | 4.66           | 0.01           | 1.28          | BRAF; MEK                     |
| 1460690_at         | BC003940      | cDNA sequence BC003940                                                                        | 4.66           | 0.01           | 1.40          | BRAF; MEK                     |
| 1436468_at         | Zdhhc8        | zinc finger. DHHC domain containing 8                                                         | 4.66           | 0.01           | 1.30          | BRAF; MEK                     |
| 1455369_at         | Apba1         | amyloid beta (A4) precursor protein binding. family A. member 1                               | 4.66           | 0.01           | 1.43          |                               |
| 1452823_at         | Gstk1         | glutathione S-transferase kappa 1                                                             | 4.66           | 0.01           | 1.98          | n.r. ;                        |
| 1456193_x_at       | Gpx4          | glutathione peroxidase 4                                                                      | 4.66           | 0.01           | 1.33          | BRAF; MEK                     |
| 1419551_s_at       | Stk39         | serine/threonine kinase 39. STE20/SPS1 homolog (yeast)                                        | 4.65           | 0.01           | 1.35          | BRAF; MEK                     |
| 1458236_at         | NA            | NA                                                                                            | 4.65           | 0.01           | 3.36          | BRAF; MEK                     |
| 1416372_at         | Ptdss1        | phosphatidylserine synthase 1                                                                 | 4.65           | 0.01           | 1.27          | BRAF; MEK                     |

| <b>Probeset ID</b> | <b>Symbol</b> | <b>Gene Name</b>                                                                              | <b>d-value</b> | <b>q-value</b> | <b>R-fold</b> | <b>Expression reversed by</b> |
|--------------------|---------------|-----------------------------------------------------------------------------------------------|----------------|----------------|---------------|-------------------------------|
| 1430292_a_at       | 1810030N24Rik | RIKEN cDNA 1810030N24 gene                                                                    | 4.65           | 0.01           | 1.78          | BRAF                          |
| 1415675_at         | Dpm2          | dolichol-phosphate (beta-D) mannosyltransferase 2                                             | 4.65           | 0.01           | 1.34          | BRAF                          |
| 1417066_at         | Cabc1         | chaperone. ABC1 activity of bc1 complex like (S. pombe)                                       | 4.65           | 0.01           | 1.39          | ; MEK                         |
| 1434162_at         | 2700078E11Rik | RIKEN cDNA 2700078E11 gene                                                                    | 4.65           | 0.01           | 1.44          | BRAF; MEK                     |
| 1423549_at         | Slc1a4        | solute carrier family 1 (glutamate/neutral amino acid transporter). member 4                  | 4.65           | 0.01           | 2.14          | BRAF; MEK                     |
| 1429292_a_at       | 2310046K01Rik | RIKEN cDNA 2310046K01 gene                                                                    | 4.64           | 0.01           | 1.32          | BRAF; MEK                     |
| 1435990_at         | Adamts2       | a disintegrin-like and metallopeptidase (reprolysin type) with thrombospondin type 1 motif. 2 | 4.64           | 0.01           | 3.42          | BRAF; MEK                     |
| 1428710_at         | Rit1          | Ras-like without CAAX 1                                                                       | 4.64           | 0.01           | 1.61          | BRAF; MEK                     |
| 1452148_at         | Lrpap1        | low density lipoprotein receptor-related protein associated protein 1                         | 4.64           | 0.01           | 2.14          | BRAF; MEK                     |
| 1424781_at         | Reep3         | receptor accessory protein 3                                                                  | 4.64           | 0.01           | 1.58          |                               |
| 1436501_at         | Mtus1         | mitochondrial tumor suppressor 1                                                              | 4.64           | 0.01           | 2.31          | BRAF; MEK                     |
| 1441478_at         | 9930013L23Rik | RIKEN cDNA 9930013L23 gene                                                                    | 4.64           | 0.01           | 1.76          | BRAF                          |
| 1447842_x_at       | NA            | NA                                                                                            | 4.63           | 0.01           | 1.46          |                               |
| 1418949_at         | Gdf15         | growth differentiation factor 15                                                              | 4.63           | 0.01           | 3.04          | ; MEK                         |
| 1452719_at         | Zdhhc24       | zinc finger. DHHC domain containing 24                                                        | 4.63           | 0.01           | 2.29          | BRAF; MEK                     |
| 1435230_at         | Ankrd12       | ankyrin repeat domain 12                                                                      | 4.63           | 0.01           | 1.60          | ; MEK                         |
| 1451720_at         | Vps39         | vacuolar protein sorting 39 (yeast)                                                           | 4.62           | 0.01           | 1.46          | ; MEK                         |
| 1435692_at         | Kctd21        | potassium channel tetramerisation domain containing 21                                        | 4.62           | 0.01           | 1.59          | BRAF; MEK                     |
| 1421063_s_at       | Snurf         | SNRPN upstream reading frame                                                                  | 4.62           | 0.01           | 1.83          | BRAF; MEK                     |
| 1425894_at         | Mrgprf        | MAS-related GPR. member F                                                                     | 4.62           | 0.01           | 3.60          | BRAF                          |
| 1420505_a_at       | Stxbp1        | syntaxin binding protein 1                                                                    | 4.61           | 0.01           | 1.54          |                               |
| 1417162_at         | Tmbim1        | transmembrane BAX inhibitor motif containing 1                                                | 4.61           | 0.01           | 2.13          | BRAF; MEK                     |
| 1454159_a_at       | Igfbp2        | insulin-like growth factor binding protein 2                                                  | 4.61           | 0.01           | 1.28          | ; MEK                         |
| 1435097_at         | Mmab          | methylmalonic aciduria (cobalamin deficiency) type B homolog (human)                          | 4.61           | 0.01           | 1.63          | BRAF                          |
| 1425610_s_at       | Galnt2        | UDP-N-acetyl-alpha-D-galactosamine:polypeptide N-acetylgalactosaminyltransferase 2            | 4.61           | 0.01           | 1.49          |                               |
| 1436788_at         | Acp2          | acid phosphatase 2. lysosomal                                                                 | 4.61           | 0.01           | 1.57          | BRAF                          |
| 1446658_at         | NA            | NA                                                                                            | 4.61           | 0.01           | 1.16          |                               |
| 1459886_at         | NA            | NA                                                                                            | 4.61           | 0.01           | 2.05          |                               |
| 1444108_at         | Dnajc25       | DnaJ (Hsp40) homolog. subfamily C . member 25                                                 | 4.61           | 0.01           | 1.42          | BRAF                          |
| 1457860_at         | NA            | NA                                                                                            | 4.60           | 0.01           | 1.36          | ; MEK                         |
| 1449907_at         | Bcmo1         | beta-carotene 15.15'-monooxygenase                                                            | 4.60           | 0.01           | 1.14          |                               |
| 1426468_at         | 0610037L13Rik | RIKEN cDNA 0610037L13 gene                                                                    | 4.60           | 0.01           | 1.41          |                               |
| 1434662_at         | Atg4a         | autophagy-related 4A (yeast)                                                                  | 4.60           | 0.01           | 1.66          | BRAF; MEK                     |
| 1460731_at         | Slc35c2       | solute carrier family 35. member C2                                                           | 4.60           | 0.01           | 1.29          | ; MEK                         |
| 1421426_at         | Hhip          | Hedgehog-interacting protein                                                                  | 4.59           | 0.01           | 3.03          |                               |
| 1442124_at         | NA            | NA                                                                                            | 4.59           | 0.01           | 1.68          | BRAF; MEK                     |
| 1450784_at         | Reck          | reversion-inducing-cysteine-rich protein with kazal motifs                                    | 4.59           | 0.01           | 3.98          | BRAF; MEK                     |
| 1416419_s_at       | Gabarapl1     | gamma-aminobutyric acid (GABA?) receptor-associated protein-like 1                            | 4.59           | 0.01           | 1.59          | BRAF; MEK                     |
| 1434379_at         | NA            | NA                                                                                            | 4.59           | 0.01           | 1.94          | BRAF                          |
| 1417625_s_at       | Cxcr7         | chemokine (C-X-C motif) receptor 7                                                            | 4.59           | 0.01           | 7.00          | BRAF; MEK                     |
| 1419577_at         | Fig4          | FIG4 homolog (S. cerevisiae)                                                                  | 4.58           | 0.01           | 1.58          |                               |
| 1423985_at         | Gng5          | guanine nucleotide binding protein (G protein). gamma 5                                       | 4.58           | 0.01           | 1.31          | BRAF; MEK                     |
| 1428503_a_at       | Nkiras1       | NFKB inhibitor interacting Ras-like protein 1                                                 | 4.58           | 0.01           | 1.73          | BRAF; MEK                     |
| 1436566_at         | Rab40b        | Rab40b. member RAS oncogene family                                                            | 4.58           | 0.01           | 2.54          | BRAF; MEK                     |
| 1435113_x_at       | Stmn3         | stathmin-like 3                                                                               | 4.57           | 0.01           | 1.40          | BRAF; MEK                     |
| 1424747_at         | Kif1c         | kinesin family member 1C                                                                      | 4.57           | 0.01           | 1.66          | BRAF; MEK                     |
| 1416831_at         | Neu1          | neuraminidase 1                                                                               | 4.57           | 0.01           | 1.97          | BRAF; MEK                     |
| 1421352_at         | Tlr6          | toll-like receptor 6                                                                          | 4.57           | 0.01           | 1.26          | ; MEK                         |
| 1420375_at         | Kif3a         | kinesin family member 3A                                                                      | 4.57           | 0.01           | 1.79          | BRAF; MEK                     |
| 1418738_at         | Scn1b         | sodium channel. voltage-gated. type I. beta                                                   | 4.56           | 0.01           | 1.46          | BRAF; MEK                     |
| 1426383_at         | Cry2          | cryptochrome 2 (photolyase-like)                                                              | 4.56           | 0.01           | 1.63          | BRAF; MEK                     |
| 1423918_at         | Rhbdd1        | rhomboïd domain containing 1                                                                  | 4.56           | 0.01           | 1.84          | BRAF; MEK                     |
| 1447544_at         | NA            | NA                                                                                            | 4.56           | 0.01           | 2.38          | BRAF; MEK                     |

| <b>Probeset ID</b> | <b>Symbol</b> | <b>Gene Name</b>                                                        | <b>d-value</b> | <b>q-value</b> | <b>R-fold</b> | <b>Expression reversed by</b> |
|--------------------|---------------|-------------------------------------------------------------------------|----------------|----------------|---------------|-------------------------------|
| 1418892_at         | Rhoj          | ras homolog gene family. member J                                       | 4.56           | 0.01           | 2.01          | BRAF; MEK                     |
| 1453312_at         | lqwd1         | IQ motif and WD repeats 1                                               | 4.56           | 0.01           | 1.46          | BRAF; MEK                     |
| 1452766_at         | Tppp          | tubulin polymerization promoting protein                                | 4.56           | 0.01           | 3.27          | BRAF; MEK                     |
| 1420565_at         | Hoxa1         | homeo box A1                                                            | 4.56           | 0.01           | 1.72          | BRAF; MEK                     |
| 1416565_at         | Cox6b1        | cytochrome c oxidase. subunit VIb polypeptide 1                         | 4.55           | 0.01           | 1.19          | ; MEK                         |
| 1419996_s_at       | Arnt          | aryl hydrocarbon receptor nuclear translocator                          | 4.55           | 0.01           | 1.28          |                               |
| 1430726_at         | Rassf8        | Ras association (RalGDS/AF-6) domain family (N-terminal) member 8       | 4.55           | 0.01           | 1.48          | ; MEK                         |
| 1451310_a_at       | Ctsl          | cathepsin L                                                             | 4.55           | 0.01           | 1.37          | BRAF; MEK                     |
| 1435106_at         | Limch1        | LIM and calponin homology domains 1                                     | 4.55           | 0.01           | 4.50          | BRAF; MEK                     |
| 1423176_at         | Tob1          | transducer of ErbB-2.1                                                  | 4.55           | 0.01           | 1.83          | ; MEK                         |
| 1427661_a_at       | Tssc4         | tumor-suppressing subchromosomal transferable fragment 4                | 4.54           | 0.01           | 1.72          | BRAF; MEK                     |
| 1420561_at         | Trpc7         | transient receptor potential cation channel. subfamily C. member 7      | 4.54           | 0.01           | 1.19          | ; MEK                         |
| 1434402_at         | Samd8         | sterile alpha motif domain containing 8                                 | 4.54           | 0.01           | 1.53          | BRAF; MEK                     |
| 1430510_at         | Evi5l         | ecotropic viral integration site 5 like                                 | 4.54           | 0.01           | 1.30          | ; MEK                         |
| 1434015_at         | Slc2a6        | solute carrier family 2 (facilitated glucose transporter). member 6     | 4.54           | 0.01           | 1.58          | BRAF; MEK                     |
| 1437527_x_at       | Mcl1          | myeloid cell leukemia sequence 1                                        | 4.54           | 0.01           | 1.83          |                               |
| 1422827_x_at       | Slc35a2       | solute carrier family 35 (UDP-galactose transporter). member A2         | 4.54           | 0.01           | 1.72          | BRAF; MEK                     |
| 1416010_a_at       | Ehd1          | EH-domain containing 1                                                  | 4.54           | 0.01           | 1.52          | BRAF; MEK                     |
| 1442537_at         | NA            | NA                                                                      | 4.53           | 0.01           | 1.80          | BRAF; MEK                     |
| 1448685_at         | 2900010M23Rik | RIKEN cDNA 2900010M23 gene                                              | 4.53           | 0.01           | 1.47          | ; MEK                         |
| 1455890_x_at       | Snrpn         | small nuclear ribonucleoprotein N                                       | 4.53           | 0.01           | 1.34          | BRAF; MEK                     |
| 1438477_a_at       | Mcee          | methylmalonyl CoA epimerase                                             | 4.53           | 0.01           | 1.32          | BRAF; MEK                     |
| 1425756_at         | Rab40b        | Rab40b. member RAS oncogene family                                      | 4.53           | 0.01           | 1.24          | BRAF; MEK                     |
| 1452579_at         | Iscu          | IscU iron-sulfur cluster scaffold homolog (E. coli)                     | 4.52           | 0.01           | 1.80          | BRAF; MEK                     |
| 1416976_at         | Stam2         | signal transducing adaptor molecule (SH3 domain and ITAM motif) 2       | 4.52           | 0.01           | 1.27          |                               |
| 1425140_at         | Lactb2        | lactamase. beta 2                                                       | 4.52           | 0.01           | 1.50          | BRAF; MEK                     |
| 1421824_at         | Bace1         | beta-site APP cleaving enzyme 1                                         | 4.51           | 0.01           | 1.66          | BRAF                          |
| 1426216_at         | Cog6          | component of oligomeric golgi complex 6                                 | 4.51           | 0.01           | 1.41          | BRAF; MEK                     |
| 1434472_at         | Dusp3         | dual specificity phosphatase 3 (vaccinia virus phosphatase VH1-related) | 4.51           | 0.01           | 2.13          | BRAF; MEK                     |
| 1438032_at         | Lrch1         | leucine-rich repeats and calponin homology (CH) domain containing 1     | 4.51           | 0.01           | 1.56          | BRAF; MEK                     |
| 1447676_x_at       | S100a16       | S100 calcium binding protein A16                                        | 4.51           | 0.01           | 4.58          | ; MEK                         |
| 1420731_a_at       | Csrp2         | cysteine and glycine-rich protein 2                                     | 4.51           | 0.01           | 1.64          | BRAF                          |
| 1448985_at         | Dusp22        | dual specificity phosphatase 22                                         | 4.51           | 0.01           | 1.48          | ; MEK                         |
| 1418261_at         | Syk           | spleen tyrosine kinase                                                  | 4.51           | 0.01           | 1.83          | ; MEK                         |
| 1422541_at         | Ptpm          | protein tyrosine phosphatase. receptor type. M                          | 4.50           | 0.01           | 1.64          | BRAF; MEK                     |
| 1433840_a_at       | C330006K01Rik | RIKEN cDNA C330006K01 gene                                              | 4.50           | 0.01           | 1.45          | BRAF; MEK                     |
| 1454152_a_at       | Grk4          | G protein-coupled receptor kinase 4                                     | 4.50           | 0.01           | 1.52          | BRAF; MEK                     |
| 1422183_a_at       | Adra1b        | adrenergic receptor. alpha 1b                                           | 4.50           | 0.01           | 1.63          | BRAF; MEK                     |
| 1439628_x_at       | Rab38         | Rab38. member of RAS oncogene family                                    | 4.50           | 0.01           | 2.17          | BRAF; MEK                     |
| 1421200_at         | Dlg2          | discs. large homolog 2 (Drosophila)                                     | 4.49           | 0.01           | 1.21          | ; MEK                         |
| 1436992_x_at       | Vdac1         | voltage-dependent anion channel 1                                       | 4.49           | 0.01           | 1.09          |                               |
| 1442098_at         | AU022434      | expressed sequence AU022434                                             | 4.49           | 0.01           | 1.24          |                               |
| 1421957_a_at       | Pcyt1a        | phosphate cytidyltransferase 1. choline. alpha isoform                  | 4.49           | 0.01           | 1.58          |                               |
| 1431055_a_at       | Snx10         | sorting nexin 10                                                        | 4.49           | 0.01           | 1.63          |                               |
| 1448890_at         | Klf2          | Kruppel-like factor 2 (lung)                                            | 4.49           | 0.01           | 3.18          |                               |
| 1429726_at         | Slc16a9       | solute carrier family 16 (monocarboxylic acid transporters). member 9   | 4.49           | 0.01           | 1.23          | BRAF                          |
| 1447418_at         | NA            | NA                                                                      | 4.48           | 0.01           | 1.15          | ; MEK                         |
| 1436603_at         | Tbl2          | transducin (beta)-like 2                                                | 4.48           | 0.01           | 1.22          |                               |
| 1445667_at         | Tbc1d10a      | TBC1 domain family. member 10a                                          | 4.48           | 0.01           | 2.01          | BRAF; MEK                     |
| 1417382_at         | Entpd5        | ectonucleoside triphosphate diphosphohydrolase 5                        | 4.48           | 0.01           | 1.45          | BRAF; MEK                     |
| 1455428_at         | A930008G19Rik | RIKEN cDNA A930008G19 gene                                              | 4.47           | 0.01           | 1.95          |                               |
| 1460260_s_at       | Kpna1         | karyopherin (importin) alpha 1                                          | 4.47           | 0.01           | 1.27          | BRAF; MEK                     |
| 1436526_at         | Gnptg         | N-acetylglucosamine-1-phosphotransferase. gamma subunit                 | 4.47           | 0.01           | 1.57          | BRAF; MEK                     |
| 1418899_at         | Ufm1          | ubiquitin-fold modifier 1                                               | 4.47           | 0.01           | 1.36          | BRAF; MEK                     |
| 1442093_at         | Adc           | arginine decarboxylase                                                  | 4.47           | 0.01           | 1.73          | BRAF; MEK                     |



| <b>Probeset ID</b> | <b>Symbol</b> | <b>Gene Name</b>                                                                              | <b>d-value</b> | <b>q-value</b> | <b>R-fold</b> | <b>Expression reversed by</b> |
|--------------------|---------------|-----------------------------------------------------------------------------------------------|----------------|----------------|---------------|-------------------------------|
| 1450674_at         | Cdk5          | cyclin-dependent kinase 5                                                                     | 4.47           | 0.01           | 1.36          | BRAF                          |
| 1418957_at         | Stac          | src homology three (SH3) and cysteine rich domain                                             | 4.47           | 0.01           | 1.31          |                               |
| 1417423_at         | Grina         | glutamate receptor. ionotropic. N-methyl D-aspartate-associated protein 1 (glutamate binding) | 4.47           | 0.01           | 2.07          | BRAF; MEK                     |
| 1437350_at         | Dph1          | DPH1 homolog (S. cerevisiae)                                                                  | 4.47           | 0.01           | 1.37          | ; MEK                         |
| 1419170_at         | Fam174a       | family with sequence similarity 174. member A                                                 | 4.46           | 0.01           | 1.74          | BRAF; MEK                     |
| 1426093_at         | Trim34        | tripartite motif-containing 34                                                                | 4.46           | 0.01           | 1.23          |                               |
| 1436841_at         | B230380D07Rik | RIKEN cDNA B230380D07 gene                                                                    | 4.46           | 0.01           | 2.08          | BRAF                          |
| 1447550_at         | EG666892      | predicted gene. EG666892                                                                      | 4.46           | 0.01           | 1.45          |                               |
| 1434017_at         | Znrf2         | zinc and ring finger 2                                                                        | 4.46           | 0.01           | 1.65          | BRAF; MEK                     |
| 1441969_at         | Trim36        | tripartite motif-containing 36                                                                | 4.46           | 0.01           | 1.56          | ; MEK                         |
| 1441774_at         | NA            | NA                                                                                            | 4.46           | 0.01           | 1.28          |                               |
| 1442101_at         | Elfn1         | leucine rich repeat and fibronectin type III. extracellular 1                                 | 4.46           | 0.01           | 2.28          | BRAF; MEK                     |
| 1439858_at         | NA            | NA                                                                                            | 4.46           | 0.01           | 1.67          | n.r. ; MEK                    |
| 1431517_at         | 4933417C20Rik | RIKEN cDNA 4933417C20 gene                                                                    | 4.45           | 0.01           | 1.16          |                               |
| 1458302_at         | NA            | NA                                                                                            | 4.45           | 0.01           | 1.44          | n.r. ;                        |
| 1441747_at         | NA            | NA                                                                                            | 4.45           | 0.01           | 1.23          |                               |
| 1448213_at         | Anxa1         | annexin A1                                                                                    | 4.45           | 0.01           | 1.28          | BRAF; MEK                     |
| 1428288_at         | 2310051E17Rik | RIKEN cDNA 2310051E17 gene                                                                    | 4.45           | 0.01           | 1.95          | BRAF; MEK                     |
| 1449620_s_at       | Adcy9         | adenylate cyclase 9                                                                           | 4.44           | 0.01           | 1.98          | BRAF                          |
| 1423583_at         | Fem1a         | feminization 1 homolog a (C. elegans)                                                         | 4.44           | 0.01           | 1.45          | BRAF; MEK                     |
| 1416318_at         | Serpnb1a      | serine (or cysteine) peptidase inhibitor. clade B. member 1a                                  | 4.44           | 0.01           | 11.00         |                               |
| 1426998_at         | Zfand3        | zinc finger. AN1-type domain 3                                                                | 4.44           | 0.01           | 2.03          | BRAF; MEK                     |
| 1429073_at         | 2210015D19Rik | RIKEN cDNA 2210015D19 gene                                                                    | 4.44           | 0.01           | 1.40          |                               |
| 1448644_at         | Pef1          | penta-EF hand domain containing 1                                                             | 4.44           | 0.01           | 1.55          | BRAF                          |
| 1417660_s_at       | Vps29         | vacuolar protein sorting 29 (S. pombe)                                                        | 4.44           | 0.01           | 1.37          | BRAF; MEK                     |
| 1434856_at         | Ankrd44       | ankyrin repeat domain 44                                                                      | 4.44           | 0.01           | 1.59          | BRAF; MEK                     |
| 1436542_at         | NA            | NA                                                                                            | 4.43           | 0.01           | 1.54          | ; MEK                         |
| 1439021_at         | Centb5        | centaurin. beta 5                                                                             | 4.43           | 0.01           | 1.48          | ; MEK                         |
| 1450923_at         | Tgfb2         | transforming growth factor. beta 2                                                            | 4.43           | 0.01           | 3.34          | BRAF; MEK                     |
| 1455582_at         | NA            | NA                                                                                            | 4.43           | 0.01           | 2.32          |                               |
| 1441264_x_at       | A930005H10Rik | RIKEN cDNA A930005H10 gene                                                                    | 4.42           | 0.01           | 1.31          |                               |
| 1448146_at         | Wwp2          | WW domain containing E3 ubiquitin protein ligase 2                                            | 4.42           | 0.01           | 1.49          |                               |
| 1438442_at         | 5730470L24Rik | RIKEN cDNA 5730470L24 gene                                                                    | 4.42           | 0.01           | 1.74          |                               |
| 1459751_s_at       | Ppp1r16a      | protein phosphatase 1. regulatory (inhibitor) subunit 16A                                     | 4.42           | 0.01           | 1.26          | n.r. ; n.r.                   |
| 1417981_at         | Insig2        | insulin induced gene 2                                                                        | 4.42           | 0.01           | 1.54          | BRAF; MEK                     |
| 1440799_s_at       | Farp2         | FERM. RhoGEF and pleckstrin domain protein 2                                                  | 4.42           | 0.01           | 2.24          | BRAF                          |
| 1428791_at         | Ube2h         | ubiquitin-conjugating enzyme E2H                                                              | 4.42           | 0.01           | 1.52          | BRAF                          |
| 1416046_a_at       | Fuca2         | fucosidase. alpha-L- 2. plasma                                                                | 4.42           | 0.01           | 3.05          |                               |
| 1440474_at         | Crot          | carnitine O-octanoyltransferase                                                               | 4.42           | 0.01           | 1.23          | ; MEK                         |
| 1416091_at         | Mtap4         | microtubule-associated protein 4                                                              | 4.41           | 0.01           | 1.72          | n.r. ; n.r.                   |
| 1429943_at         | Ctbs          | chitinase. di-N-acetyl-                                                                       | 4.41           | 0.01           | 2.02          |                               |
| 1442051_at         | Hist2h3c1     | histone cluster 2. H3c1                                                                       | 4.41           | 0.01           | 5.78          | BRAF; MEK                     |
| 1417008_at         | Crat          | carnitine acetyltransferase                                                                   | 4.41           | 0.01           | 1.50          | BRAF                          |
| 1452955_at         | Gtf2h5        | general transcription factor IIH. polypeptide 5                                               | 4.41           | 0.01           | 1.66          | BRAF                          |
| 1451489_at         | Slc25a35      | solute carrier family 25. member 35                                                           | 4.40           | 0.01           | 1.49          | BRAF; MEK                     |
| 1452446_a_at       | Tmub2         | transmembrane and ubiquitin-like domain containing 2                                          | 4.40           | 0.01           | 1.52          | BRAF; MEK                     |
| 1441076_at         | Mpv17         | Mpv17 transgene. kidney disease mutant                                                        | 4.40           | 0.01           | 1.40          | BRAF; MEK                     |
| 1457368_at         | 2310033K02Rik | RIKEN cDNA 2310033K02 gene                                                                    | 4.40           | 0.01           | 1.21          | BRAF; MEK                     |
| 1425868_at         | Hist2h2bb     | histone cluster 2. H2bb                                                                       | 4.40           | 0.01           | 2.30          | BRAF; MEK                     |
| 1440330_at         | Hist1h1e      | histone cluster 1. H1e                                                                        | 4.40           | 0.01           | 1.43          | BRAF; MEK                     |
| 1448477_at         | Chst12        | carbohydrate sulfotransferase 12                                                              | 4.40           | 0.01           | 1.51          | BRAF; MEK                     |
| 1456716_s_at       | 3110002H16Rik | RIKEN cDNA 3110002H16 gene                                                                    | 4.40           | 0.01           | 1.59          |                               |
| 1429551_at         | 4930579G22Rik | RIKEN cDNA 4930579G22 gene                                                                    | 4.40           | 0.01           | 1.36          | ; MEK                         |
| 1419005_at         | Crybb3        | crystallin. beta B3                                                                           | 4.40           | 0.01           | 1.31          | BRAF; MEK                     |
| 1451309_at         | Arhgap1       | Rho GTPase activating protein 1                                                               | 4.39           | 0.01           | 1.34          |                               |

| <b>Probeset ID</b> | <b>Symbol</b> | <b>Gene Name</b>                                             | <b>d-value</b> | <b>q-value</b> | <b>R-fold</b> | <b>Expression reversed by</b> |
|--------------------|---------------|--------------------------------------------------------------|----------------|----------------|---------------|-------------------------------|
| 1431176_at         | Chmp4c        | chromatin modifying protein 4C                               | 4.39           | 0.01           | 1.79          | n.r. ;                        |
| 1423574_s_at       | Srd5a3        | steroid 5 alpha-reductase 3                                  | 4.39           | 0.01           | 1.28          | ; MEK                         |
| 1438678_at         | 1500011K16Rik | RIKEN cDNA 1500011K16 gene                                   | 4.39           | 0.01           | 1.49          | BRAF; MEK                     |
| 1434129_s_at       | Lhfp12        | lipoma HMGIC fusion partner-like 2                           | 4.39           | 0.01           | 2.18          | BRAF; MEK                     |
| 1438532_at         | Hmcn1         | hemicentin 1                                                 | 4.39           | 0.01           | 5.22          | BRAF; MEK                     |
| 1457825_x_at       | Tcn2          | transcobalamin 2                                             | 4.39           | 0.01           | 2.47          | BRAF; MEK                     |
| 1456737_x_at       | Acaa1a        | acetyl-Coenzyme A acyltransferase 1A                         | 4.39           | 0.01           | 1.34          |                               |
| 1419292_at         | Htra3         | HtrA serine peptidase 3                                      | 4.39           | 0.01           | 1.39          |                               |
| 1424444_a_at       | 1600014C10Rik | RIKEN cDNA 1600014C10 gene                                   | 4.39           | 0.01           | 1.50          | BRAF; MEK                     |
| 1420282_s_at       | Prss29        | protease. serine. 29                                         | 4.38           | 0.01           | 1.20          | BRAF; MEK                     |
| 1455939_x_at       | Srp14         | signal recognition particle 14                               | 4.38           | 0.01           | 1.38          |                               |
| 1436101_at         | Pank2         | pantothenate kinase 2 (Hallervorden-Spatz syndrome)          | 4.38           | 0.01           | 1.87          | BRAF                          |
| 1424650_at         | Pdia5         | protein disulfide isomerase associated 5                     | 4.38           | 0.01           | 1.34          | ; MEK                         |
| 1424638_at         | Cdkn1a        | cyclin-dependent kinase inhibitor 1A (P21)                   | 4.38           | 0.01           | 1.50 *        | ; MEK                         |
| 1417848_at         | Zfp704        | zinc finger protein 704                                      | 4.38           | 0.01           | 1.89          |                               |
| 1454215_at         | 2410007B07Rik | RIKEN cDNA 2410007B07 gene                                   | 4.38           | 0.01           | 1.18          |                               |
| 1426642_at         | Fn1           | fibronectin 1                                                | 4.38           | 0.01           | 1.17          | BRAF; MEK                     |
| 1418049_at         | Ltbp3         | latent transforming growth factor beta binding protein 3     | 4.38           | 0.01           | 1.70          |                               |
| 1424691_at         | 5930434B04Rik | RIKEN cDNA 5930434B04 gene                                   | 4.37           | 0.01           | 1.40          | BRAF                          |
| 1426646_at         | 9130011J15Rik | RIKEN cDNA 9130011J15 gene                                   | 4.37           | 0.01           | 1.49          | ; MEK                         |
| 1427035_at         | Slc39a14      | solute carrier family 39 (zinc transporter). member 14       | 4.37           | 0.01           | 1.25          |                               |
| 1455113_at         | Armc8         | armadillo repeat containing 8                                | 4.37           | 0.01           | 1.89          | BRAF                          |
| 1460728_s_at       | Ing4          | inhibitor of growth family. member 4                         | 4.37           | 0.01           | 1.40          | BRAF; MEK                     |
| 1419981_at         | Riok3         | RIO kinase 3 (yeast)                                         | 4.37           | 0.01           | 1.19          |                               |
| 1418419_at         | Fbxl20        | F-box and leucine-rich repeat protein 20                     | 4.37           | 0.01           | 1.40          | ; MEK                         |
| 1455595_at         | Ugt2b36       | UDP glucuronosyltransferase 2 family. polypeptide B36        | 4.37           | 0.01           | 1.26          | BRAF; MEK                     |
| 1417399_at         | Gas6          | growth arrest specific 6                                     | 4.37           | 0.01           | 3.40          | ; MEK                         |
| 1424521_at         | Zfand2b       | zinc finger. AN1 type domain 2B                              | 4.37           | 0.01           | 1.69          | BRAF; MEK                     |
| 1439860_at         | Eef2k         | eukaryotic elongation factor-2 kinase                        | 4.37           | 0.01           | 1.44          |                               |
| 1449437_at         | D6Wsu163e     | DNA segment. Chr 6. Wayne State University 163. expressed    | 4.36           | 0.01           | 1.88          | BRAF; MEK                     |
| 1445170_at         | 2700012I20Rik | RIKEN cDNA 2700012I20 gene                                   | 4.36           | 0.01           | 1.27          | ; MEK                         |
| 1435345_at         | Cercam        | cerebral endothelial cell adhesion molecule                  | 4.36           | 0.01           | 1.53          | BRAF                          |
| 1415727_at         | Apoa1bp       | apolipoprotein A-I binding protein                           | 4.36           | 0.01           | 1.56          | BRAF                          |
| 1415732_at         | Bat5          | HLA-B associated transcript 5                                | 4.36           | 0.01           | 1.43          | BRAF                          |
| 1438061_at         | 4930523C07Rik | RIKEN cDNA 4930523C07 gene                                   | 4.36           | 0.01           | 1.62          | BRAF; MEK                     |
| 1455543_at         | Klh18         | kelch-like 18 (Drosophila)                                   | 4.36           | 0.01           | 1.41          |                               |
| 1416011_x_at       | Ehd1          | EH-domain containing 1                                       | 4.36           | 0.01           | 1.52          | BRAF; MEK                     |
| 1416947_s_at       | Acaa1a        | acetyl-Coenzyme A acyltransferase 1A                         | 4.36           | 0.01           | 1.55          | BRAF                          |
| 1436294_at         | Ankrd29       | ankyrin repeat domain 29                                     | 4.35           | 0.01           | 2.44          | BRAF                          |
| 1460330_at         | Anxa3         | annexin A3                                                   | 4.35           | 0.01           | 1.21          |                               |
| 1436208_at         | Asb1          | ankyrin repeat and SOCS box-containing 1                     | 4.35           | 0.01           | 1.35          | BRAF; MEK                     |
| 1441208_at         | NA            | NA                                                           | 4.35           | 0.01           | 1.44          | ; MEK                         |
| 1448301_s_at       | Serp1b1a      | serine (or cysteine) peptidase inhibitor. clade B. member 1a | 4.35           | 0.01           | 3.30          |                               |
| 1429153_at         | 6530406A20Rik | RIKEN cDNA 6530406A20 gene                                   | 4.35           | 0.01           | 1.41          |                               |
| 1423204_at         | Tm9sf4        | transmembrane 9 superfamily protein member 4                 | 4.35           | 0.01           | 1.24          | BRAF                          |
| 1424074_at         | Btf3l4        | basic transcription factor 3-like 4                          | 4.35           | 0.01           | 1.43          | ; n.r.                        |
| 1455710_x_at       | Mtcp1         | mature T-cell proliferation 1                                | 4.35           | 0.01           | 1.44          | ; MEK                         |
| 1432377_x_at       | Shroom3       | shroom family member 3                                       | 4.35           | 0.01           | 1.40          | BRAF; MEK                     |
| 1449099_at         | Lrba          | LPS-responsive beige-like anchor                             | 4.35           | 0.01           | 1.58          | n.r. ;                        |
| 1417960_at         | Cpeb1         | cytoplasmic polyadenylation element binding protein 1        | 4.35           | 0.01           | 2.70          | BRAF; MEK                     |
| 1434369_a_at       | Cryab         | crystallin. alpha B                                          | 4.35           | 0.01           | 2.02          |                               |
| 1444736_at         | Cdh7          | cadherin 7. type 2                                           | 4.35           | 0.01           | 1.14          |                               |
| 1460703_at         | Ascc1         | activating signal cointegrator 1 complex subunit 1           | 4.34           | 0.01           | 1.27          | n.r. ; n.r.                   |
| 1430326_s_at       | Uqcrcq        | ubiquinol-cytochrome c reductase. complex III subunit VII    | 4.34           | 0.01           | 1.46          | BRAF; MEK                     |
| 1428612_at         | Atg7          | autophagy-related 7 (yeast)                                  | 4.34           | 0.01           | 1.35          |                               |
| 1458790_at         | NA            | NA                                                           | 4.34           | 0.01           | 1.17          |                               |

| <b>Probeset ID</b> | <b>Symbol</b> | <b>Gene Name</b>                                                 | <b>d-value</b> | <b>q-value</b> | <b>R-fold</b> | <b>Expression reversed by</b> |
|--------------------|---------------|------------------------------------------------------------------|----------------|----------------|---------------|-------------------------------|
| 1455825_s_at       | Lnx1          | ligand of numb-protein X 1                                       | 4.34           | 0.01           | 1.25          |                               |
| 1423779_at         | Chchd6        | coiled-coil-helix-coiled-coil-helix domain containing 6          | 4.34           | 0.01           | 1.43          | n.r. ; MEK                    |
| 1456243_x_at       | Mcl1          | myeloid cell leukemia sequence 1                                 | 4.34           | 0.01           | 1.79          |                               |
| 1448648_at         | 9130005N14Rik | RIKEN cDNA 9130005N14 gene                                       | 4.34           | 0.01           | 1.46          | BRAF; MEK                     |
| 1428058_at         | Ahnak         | AHNAK nucleoprotein (desmoyokin)                                 | 4.34           | 0.01           | 2.10          |                               |
| 1418793_at         | Idua          | iduronidase, alpha-L-                                            | 4.34           | 0.01           | 1.26          |                               |
| 1428075_at         | Ndufb4        | NADH dehydrogenase (ubiquinone) 1 beta subcomplex 4              | 4.34           | 0.01           | 1.40          |                               |
| 1451159_at         | Arhgef12      | Rho guanine nucleotide exchange factor (GEF) 12                  | 4.34           | 0.01           | 1.25          | BRAF                          |
| 1416012_at         | Ehd1          | EH-domain containing 1                                           | 4.33           | 0.01           | 1.75          |                               |
| 1448200_at         | Tcn2          | transcobalamin 2                                                 | 4.33           | 0.01           | 2.50          | BRAF; MEK                     |
| 1448483_a_at       | Ndufb2        | NADH dehydrogenase (ubiquinone) 1 beta subcomplex. 2             | 4.33           | 0.01           | 1.31          |                               |
| 1460241_a_at       | St3gal5       | ST3 beta-galactoside alpha-2.3-sialyltransferase 5               | 4.33           | 0.01           | 1.82          | BRAF; MEK                     |
| 1439592_at         | LOC100043911  | hypothetical protein LOC100043911                                | 4.33           | 0.01           | 1.70          | BRAF; MEK                     |
| 1429762_a_at       | Bbs5          | Bardet-Biedl syndrome 5 (human)                                  | 4.33           | 0.01           | 1.54          | BRAF; MEK                     |
| 1455712_at         | Hist3h2a      | histone cluster 3. H2a                                           | 4.33           | 0.01           | 2.30          |                               |
| 1459809_x_at       | 1700063D05Rik | RIKEN cDNA 1700063D05 gene                                       | 4.33           | 0.01           | 1.12          |                               |
| 1435559_at         | Myo6          | myosin VI                                                        | 4.33           | 0.01           | 1.28          |                               |
| 1441206_at         | Synpo2        | synaptopodin 2                                                   | 4.32           | 0.01           | 1.72          | BRAF; MEK                     |
| 1427410_at         | Dleu2         | deleted in lymphocytic leukemia. 2                               | 4.32           | 0.01           | 1.94          | BRAF; n.r.                    |
| 1436388_a_at       | 3830406C13Rik | RIKEN cDNA 3830406C13 gene                                       | 4.32           | 0.01           | 1.81          |                               |
| 1434768_at         | Tpp1          | tripeptidyl peptidase I                                          | 4.32           | 0.01           | 2.12          | BRAF; MEK                     |
| 1436544_at         | Atp10d        | ATPase, class V, type 10D                                        | 4.32           | 0.01           | 1.72          |                               |
| 1446771_at         | Tuba8         | tubulin, alpha 8                                                 | 4.32           | 0.01           | 1.16          |                               |
| 1443729_at         | Mtss1         | metastasis suppressor 1                                          | 4.32           | 0.01           | 1.33          | BRAF                          |
| 1419137_at         | Shank3        | SH3/ankyrin domain gene 3                                        | 4.32           | 0.01           | 1.88          |                               |
| 1450879_at         | Atp9b         | ATPase, class II, type 9B                                        | 4.32           | 0.01           | 1.35          | BRAF; MEK                     |
| 1422594_at         | 5730470L24Rik | RIKEN cDNA 5730470L24 gene                                       | 4.32           | 0.01           | 1.45          | BRAF; MEK                     |
| 1437058_at         | Megf6         | multiple EGF-like-domains 6                                      | 4.32           | 0.01           | 1.26          |                               |
| 1428330_at         | Dopey2        | dopey family member 2                                            | 4.31           | 0.01           | 2.01          | ; MEK                         |
| 1416007_at         | Satb1         | special AT-rich sequence binding protein 1                       | 4.31           | 0.01           | 3.28          |                               |
| 1456100_at         | BC089491      | cDNA sequence BC089491                                           | 4.31           | 0.01           | 1.22          |                               |
| 1428211_at         | 4933406E20Rik | RIKEN cDNA 4933406E20 gene                                       | 4.31           | 0.01           | 1.57          | BRAF                          |
| 1450140_a_at       | Cdkn2a        | cyclin-dependent kinase inhibitor 2A                             | 3.89           | 0.01           | 3.97 *        | n.r. ; n.r.                   |
| 1424229_at         | Dyrk3         | dual-specificity tyrosine-?-phosphorylation regulated kinase 3   | -4.03          | 0.01           | 0.41          |                               |
| 1454929_s_at       | Safb          | scaffold attachment factor B                                     | -4.03          | 0.01           | 0.72          | BRAF; MEK                     |
| 1417951_at         | Eno3          | enolase 3, beta muscle                                           | -4.03          | 0.01           | 0.48          | BRAF; MEK                     |
| 1452192_at         | Naf1          | nuclear assembly factor 1 homolog (S. cerevisiae)                | -4.03          | 0.01           | 0.71          | BRAF                          |
| 1440715_s_at       | Cdkn2aipnl    | CDKN2A interacting protein N-terminal like                       | -4.03          | 0.01           | 0.59          | ; MEK                         |
| 1448230_at         | Usp10         | ubiquitin specific peptidase 10                                  | -4.03          | 0.01           | 0.68          |                               |
| 1455524_at         | 2810046L04Rik | RIKEN cDNA 2810046L04 gene                                       | -4.03          | 0.01           | 0.77          | BRAF; MEK                     |
| 1424412_at         | Ogfrl1        | opioid growth factor receptor-like 1                             | -4.03          | 0.01           | 0.69          | BRAF                          |
| 1435730_at         | D930026N18Rik | RIKEN cDNA D930026N18 gene                                       | -4.03          | 0.01           | 0.68          | ; MEK                         |
| 1441910_x_at       | Ccne1         | cyclin E1                                                        | -4.03          | 0.01           | 0.58 *        |                               |
| 1417886_at         | Ints5         | integrator complex subunit 5                                     | -4.04          | 0.01           | 0.75          |                               |
| 1438735_at         | Rsf1          | remodeling and spacing factor 1                                  | -4.04          | 0.01           | 0.71          |                               |
| 1427403_at         | Slco1a5       | solute carrier organic anion transporter family, member 1a5      | -4.04          | 0.01           | 0.83          |                               |
| 1424938_at         | Steap1        | six transmembrane epithelial antigen of the prostate 1           | -4.04          | 0.01           | 0.37          | ; MEK                         |
| 1435174_at         | Rsbn1         | rosbin, round spermatid basic protein 1                          | -4.04          | 0.01           | 0.61          | ; MEK                         |
| 1454875_a_at       | Rbbp4         | retinoblastoma binding protein 4                                 | -4.04          | 0.01           | 0.62          |                               |
| 1416152_a_at       | Sfrs3         | splicing factor, arginine/serine-rich 3 (SRp20)                  | -4.04          | 0.01           | 0.67          |                               |
| 1438354_x_at       | Cnn3          | calponin 3, acidic                                               | -4.04          | 0.01           | 0.79          | ; MEK                         |
| 1419266_at         | Nfyb          | nuclear transcription factor-Y beta                              | -4.04          | 0.01           | 0.73          |                               |
| 1423882_at         | Rfwd3         | ring finger and WD repeat domain 3                               | -4.04          | 0.01           | 0.59          | BRAF; MEK                     |
| 1424173_at         | Tmem48        | transmembrane protein 48                                         | -4.04          | 0.01           | 0.53          | BRAF                          |
| 1435439_at         | Dgcr8         | DiGeorge syndrome critical region gene 8                         | -4.04          | 0.01           | 0.74          |                               |
| 1417082_at         | Anp32b        | acidic (leucine-rich) nuclear phosphoprotein 32 family, member B | -4.04          | 0.01           | 0.65          | ; MEK                         |

| <b>Probeset ID</b> | <b>Symbol</b>     | <b>Gene Name</b>                                                                            | <b>d-value</b> | <b>q-value</b> | <b>R-fold</b> | <b>Expression reversed by</b> |
|--------------------|-------------------|---------------------------------------------------------------------------------------------|----------------|----------------|---------------|-------------------------------|
| 1423539_at         | Pms2              | postmeiotic segregation increased 2 (S. cerevisiae)                                         | -4.04          | 0.01           | 0.68          | ; MEK                         |
| 1419940_at         | C030018P15Rik     | RIKEN cDNA C030018P15 gene                                                                  | -4.05          | 0.01           | 0.74          |                               |
| 1429404_at         | 2010317E24Rik     | RIKEN cDNA 2010317E24 gene                                                                  | -4.05          | 0.01           | 0.60          |                               |
| 1428407_at         | Hnmpa0            | heterogeneous nuclear ribonucleoprotein A0                                                  | -4.05          | 0.01           | 0.77          |                               |
| 1449044_at         | Eef1e1            | eukaryotic translation elongation factor 1 epsilon 1                                        | -4.05          | 0.01           | 0.78          |                               |
| 1456433_at         | H2afy2            | H2A histone family, member Y2                                                               | -4.05          | 0.01           | 0.80          |                               |
| 1426755_at         | Ckap4             | cytoskeleton-associated protein 4                                                           | -4.05          | 0.01           | 0.69          |                               |
| 1417238_at         | Ewsr1             | Ewing sarcoma breakpoint region 1                                                           | -4.05          | 0.01           | 0.64          |                               |
| 1423829_at         | 0910001A06Rik     | RIKEN cDNA 0910001A06 gene                                                                  | -4.05          | 0.01           | 0.72          | BRAF; MEK                     |
| 1459805_x_at       | Dus3l             | dihydrouridine synthase 3-like (S. cerevisiae)                                              | -4.05          | 0.01           | 0.75          | BRAF; MEK                     |
| 1454764_s_at       | Slc38a1           | solute carrier family 38, member 1                                                          | -4.05          | 0.01           | 0.45          | n.r. ;                        |
| 1449090_a_at       | Yes1              | Yamaguchi sarcoma viral (v-yes) oncogene homolog 1                                          | -4.05          | 0.01           | 0.72          |                               |
| 1443466_s_at       | Polr3b            | polymerase (RNA) III (DNA directed) polypeptide B                                           | -4.05          | 0.01           | 0.79          | ; MEK                         |
| 1422801_at         | G3bp1             | Ras-GTPase-activating protein SH3-domain binding protein 1                                  | -4.05          | 0.01           | 0.67          | BRAF; MEK                     |
| 1452107_s_at       | NA                | NA                                                                                          | -4.05          | 0.01           | 0.17          | BRAF; MEK                     |
| 1454064_a_at       | Rnf138            | ring finger protein 138                                                                     | -4.05          | 0.01           | 0.68          |                               |
| 1429242_at         | 1110054O05Rik     | RIKEN cDNA 1110054O05 gene                                                                  | -4.06          | 0.01           | 0.68          |                               |
| 1428533_at         | D1Bwg0212e        | DNA segment, Chr 1, Brigham & Women's Genetics 0212 expressed                               | -4.06          | 0.01           | 0.75          | BRAF; MEK                     |
| 1452857_at         | Crebzf            | CREB/ATF bZIP transcription factor                                                          | -4.06          | 0.01           | 0.56          | ; MEK                         |
| 1419152_at         | 2810417H13Rik     | RIKEN cDNA 2810417H13 gene                                                                  | -4.06          | 0.01           | 0.61          | BRAF; MEK                     |
| 1433606_at         | Dcp1a             | DCP1 decapping enzyme homolog A (S. cerevisiae)                                             | -4.06          | 0.01           | 0.74          |                               |
| 1455317_at         | Epc2              | enhancer of polycomb homolog 2 (Drosophila)                                                 | -4.06          | 0.01           | 0.70          |                               |
| 1453293_a_at       | 2810408A11Rik     | RIKEN cDNA 2810408A11 gene                                                                  | -4.06          | 0.01           | 0.66          | BRAF; n.r.                    |
| 1428301_at         | ENSMUSG0000068790 | predicted gene, ENSMUSG0000068790                                                           | -4.06          | 0.01           | 0.48          | BRAF                          |
| 1419469_at         | Gnb4              | guanine nucleotide binding protein (G protein), beta 4                                      | -4.06          | 0.01           | 0.42          |                               |
| 1418634_at         | Notch1            | Notch gene homolog 1 (Drosophila)                                                           | -4.07          | 0.01           | 0.49          | BRAF; MEK                     |
| 1451532_s_at       | Steap1            | six transmembrane epithelial antigen of the prostate 1                                      | -4.07          | 0.01           | 0.46          | BRAF; MEK                     |
| 1426369_at         | Far1              | fatty acyl CoA reductase 1                                                                  | -4.07          | 0.01           | 0.78          |                               |
| 1452350_at         | Brd8              | bromodomain containing 8                                                                    | -4.07          | 0.01           | 0.51          |                               |
| 1434753_at         | Nfrkb             | nuclear factor related to kappa B binding protein                                           | -4.07          | 0.01           | 0.79          | BRAF; MEK                     |
| 1431075_a_at       | Eif4enif1         | eukaryotic translation initiation factor 4E nuclear import factor 1                         | -4.07          | 0.01           | 0.74          | BRAF; MEK                     |
| 1434336_s_at       | Rcor1             | REST corepressor 1                                                                          | -4.08          | 0.01           | 0.63          | BRAF; MEK                     |
| 1460716_a_at       | Cbfb              | core binding factor beta                                                                    | -4.08          | 0.01           | 0.67          |                               |
| 1426964_at         | 3110003A17Rik     | RIKEN cDNA 3110003A17 gene                                                                  | -4.08          | 0.01           | 0.72          |                               |
| 1455048_at         | Igsf3             | immunoglobulin superfamily, member 3                                                        | -4.08          | 0.01           | 0.56          |                               |
| 1438955_x_at       | Ppif              | peptidylprolyl isomerase F (cyclophilin F)                                                  | -4.08          | 0.01           | 0.67          | BRAF; MEK                     |
| 1437682_x_at       | 1110004E09Rik     | RIKEN cDNA 1110004E09 gene                                                                  | -4.08          | 0.01           | 0.76          |                               |
| 1437634_at         | Thoc2             | THO complex 2                                                                               | -4.08          | 0.01           | 0.74          |                               |
| 1419402_at         | Mns1              | meiosis-specific nuclear structural protein 1                                               | -4.08          | 0.01           | 0.69          | ; MEK                         |
| 1416595_at         | Mrps22            | mitochondrial ribosomal protein S22                                                         | -4.08          | 0.01           | 0.69          | BRAF; MEK                     |
| 1437286_x_at       | 1110020G09Rik     | RIKEN cDNA 1110020G09 gene                                                                  | -4.08          | 0.01           | 0.82          |                               |
| 1424147_at         | Ahsa1             | AHA1, activator of heat shock protein ATPase homolog 1 (yeast)                              | -4.08          | 0.01           | 0.76          | BRAF; MEK                     |
| 1417183_at         | Dnaja2            | DnaJ (Hsp40) homolog, subfamily A, member 2                                                 | -4.08          | 0.01           | 0.78          | BRAF                          |
| 1436585_at         | BB182297          | expressed sequence BB182297                                                                 | -4.08          | 0.01           | 0.63          | ; MEK                         |
| 1442618_at         | NA                | NA                                                                                          | -4.08          | 0.01           | 0.74          |                               |
| 1433398_at         | Fgd3              | FYVE, RhoGEF and PH domain containing 3                                                     | -4.08          | 0.01           | 0.45          | ; n.r.                        |
| 1418772_at         | BC016423          | cDNA sequence BC016423                                                                      | -4.08          | 0.01           | 0.63          | ; MEK                         |
| 1424166_at         | Msh3              | mutS homolog 3 (E. coli)                                                                    | -4.09          | 0.01           | 0.53          | BRAF; MEK                     |
| 1457830_at         | NA                | NA                                                                                          | -4.09          | 0.01           | 0.65          | BRAF; MEK                     |
| 1454817_at         | Utp18             | UTP18, small subunit (SSU) processome component, homolog (yeast)                            | -4.09          | 0.01           | 0.65          | BRAF                          |
| 1426683_at         | Cnot6             | CCR4-NOT transcription complex, subunit 6                                                   | -4.09          | 0.01           | 0.68          | ; MEK                         |
| 1416650_at         | Rfp14             | ret finger protein-like 4                                                                   | -4.09          | 0.01           | 0.89          |                               |
| 1452552_at         | Npn2              | neoplastic progression 2                                                                    | -4.09          | 0.01           | 0.84          | BRAF                          |
| 1428251_at         | Smchd1            | SMC hinge domain containing 1                                                               | -4.09          | 0.01           | 0.45          | BRAF; MEK                     |
| 1441062_at         | Ddx11             | DEAD/H (Asp-Glu-Ala-Asp/His) box polypeptide 11 (CHL1-like helicase homolog, S. cerevisiae) | -4.09          | 0.01           | 0.52          | BRAF; MEK                     |

| <b>Probeset ID</b> | <b>Symbol</b> | <b>Gene Name</b>                                                                              | <b>d-value</b> | <b>q-value</b> | <b>R-fold</b> | <b>Expression reversed by</b> |
|--------------------|---------------|-----------------------------------------------------------------------------------------------|----------------|----------------|---------------|-------------------------------|
| 1456058_at         | Rbm27         | RNA binding motif protein 27                                                                  | -4.09          | 0.01           | 0.66          | ; MEK                         |
| 1451144_at         | Bxdc2         | brix domain containing 2                                                                      | -4.09          | 0.01           | 0.62          | ; MEK                         |
| 1418835_at         | Phlda1        | pleckstrin homology-like domain, family A, member 1                                           | -4.09          | 0.01           | 0.33          | BRAF; MEK                     |
| 1423480_at         | Nol11         | nucleolar protein 11                                                                          | -4.09          | 0.01           | 0.74          | BRAF; MEK                     |
| 1424314_at         | Prpf3         | PRP3 pre-mRNA processing factor 3 homolog (yeast)                                             | -4.10          | 0.01           | 0.70          | BRAF; MEK                     |
| 1436499_at         | Sgms1         | sphingomyelin synthase 1                                                                      | -4.10          | 0.01           | 0.59          | n.r. ; n.r.                   |
| 1423586_at         | Axl           | AXL receptor tyrosine kinase                                                                  | -4.10          | 0.01           | 0.49          | BRAF                          |
| 1438404_at         | Rnf144a       | ring finger protein 144A                                                                      | -4.10          | 0.01           | 0.52          | ; MEK                         |
| 1427504_s_at       | Sfrs2         | splicing factor, arginine/serine-rich 2 (SC-35)                                               | -4.10          | 0.01           | 0.67          | BRAF                          |
| 1426012_a_at       | 2610301G19Rik | RIKEN cDNA 2610301G19 gene                                                                    | -4.10          | 0.01           | 0.74          | ; MEK                         |
| 1433706_a_at       | Ptplad1       | protein tyrosine phosphatase-like A domain containing 1                                       | -4.10          | 0.01           | 0.76          |                               |
| 1436654_at         | Gen1          | Gen homolog 1, endonuclease (Drosophila)                                                      | -4.11          | 0.01           | 0.59          | BRAF; MEK                     |
| 1454703_x_at       | Snhg1         | small nucleolar RNA host gene (non-protein coding) 1                                          | -4.11          | 0.01           | 0.54          |                               |
| 1439435_x_at       | Pgk1          | phosphoglycerate kinase 1                                                                     | -4.11          | 0.01           | 0.82          | ; MEK                         |
| 1416536_at         | Mum1          | melanoma associated antigen (mutated) 1                                                       | -4.11          | 0.01           | 0.64          | BRAF; MEK                     |
| 1426803_at         | Rbm26         | RNA binding motif protein 26                                                                  | -4.11          | 0.01           | 0.66          | n.r. ; MEK                    |
| 1418443_at         | Xpo1          | exportin 1, CRM1 homolog (yeast)                                                              | -4.11          | 0.01           | 0.51          | BRAF; MEK                     |
| 1433650_at         | Narfl         | nuclear prelamin A recognition factor-like                                                    | -4.11          | 0.01           | 0.84          |                               |
| 1428145_at         | Acaa2         | acetyl-Coenzyme A acyltransferase 2 (mitochondrial 3-oxoacyl-Coenzyme A thiolase)             | -4.11          | 0.01           | 0.68          | BRAF; MEK                     |
| 1415869_a_at       | Trim28        | tripartite motif-containing 28                                                                | -4.11          | 0.01           | 0.61          | BRAF; MEK                     |
| 1419912_s_at       | Strap         | serine/threonine kinase receptor associated protein                                           | -4.11          | 0.01           | 0.71          | BRAF                          |
| 1416746_at         | H2afx         | H2A histone family, member X                                                                  | -4.11          | 0.01           | 0.55          | BRAF; MEK                     |
| 1435655_at         | Rpl12         | ribosomal protein L12                                                                         | -4.11          | 0.01           | 0.45          | BRAF; MEK                     |
| 1460357_at         | Ythdf2        | YTH domain family 2                                                                           | -4.12          | 0.01           | 0.78          | BRAF; MEK                     |
| 1424413_at         | Ogfr1l        | opioid growth factor receptor-like 1                                                          | -4.12          | 0.01           | 0.69          | BRAF; MEK                     |
| 1448358_s_at       | Snrng         | small nuclear ribonucleoprotein polypeptide G                                                 | -4.12          | 0.01           | 0.63          | BRAF; MEK                     |
| 1426433_at         | Myct1         | myc target 1                                                                                  | -4.12          | 0.01           | 0.21          | ; n.r.                        |
| 1437497_a_at       | Hsp90aa1      | heat shock protein 90, alpha (cytosolic), class A member 1                                    | -4.12          | 0.01           | 0.69          |                               |
| 1458172_at         | Me2           | malic enzyme 2, NAD <sup>+</sup> -dependent, mitochondrial                                    | -4.12          | 0.01           | 0.82          |                               |
| 1433928_a_at       | Rpl13a        | ribosomal protein L13a                                                                        | -4.12          | 0.01           | 0.73          | ; MEK                         |
| 1433830_at         | Hnmpa2b1      | heterogeneous nuclear ribonucleoprotein A2/B1                                                 | -4.12          | 0.01           | 0.42          | ; MEK                         |
| 1456340_at         | Mettl11a      | methyltransferase like 11A                                                                    | -4.12          | 0.01           | 0.76          |                               |
| 1438212_at         | Vil1          | villin 1                                                                                      | -4.12          | 0.01           | 0.69          | BRAF; MEK                     |
| 1423489_at         | Mmd           | monocyte to macrophage differentiation-associated                                             | -4.12          | 0.01           | 0.33          | BRAF; MEK                     |
| 1434836_at         | Nfatc2lp      | nuclear factor of activated T-cells, cytoplasmic, calcineurin-dependent 2 interacting protein | -4.12          | 0.01           | 0.67          |                               |
| 1433656_a_at       | Gnl3          | guanine nucleotide binding protein-like 3 (nucleolar)                                         | -4.12          | 0.01           | 0.73          |                               |
| 1429871_at         | Hmmr          | hyaluronan mediated motility receptor (RHAMM)                                                 | -4.12          | 0.01           | 0.59          | BRAF; MEK                     |
| 1419819_s_at       | Sec63         | SEC63-like (S. cerevisiae)                                                                    | -4.12          | 0.01           | 0.66          | n.r. ; n.r.                   |
| 1442454_at         | Top2a         | topoisomerase (DNA) II alpha                                                                  | -4.12          | 0.01           | 0.44          | BRAF; MEK                     |
| 1460011_at         | Cyp26b1       | cytochrome P450, family 26, subfamily b, polypeptide 1                                        | -4.12          | 0.01           | 0.70          | BRAF; MEK                     |
| 1438076_at         | Rpl30         | ribosomal protein L30                                                                         | -4.12          | 0.01           | 0.39          | ; MEK                         |
| 1435077_at         | Asxl1         | additional sex combs like 1 (Drosophila)                                                      | -4.13          | 0.01           | 0.61          | BRAF; MEK                     |
| 1453928_a_at       | Ssb           | Sjogren syndrome antigen B                                                                    | -4.13          | 0.01           | 0.60          |                               |
| 1448802_at         | Nufip1        | nuclear fragile X mental retardation protein interacting protein 1                            | -4.13          | 0.01           | 0.73          |                               |
| 1428223_at         | Mfsd2         | major facilitator superfamily domain containing 2                                             | -4.13          | 0.01           | 0.43          |                               |
| 1427764_a_at       | Tcfe2a        | transcription factor E2a                                                                      | -4.13          | 0.01           | 0.58          | BRAF; MEK                     |
| 1457374_at         | Nedd4l        | neural precursor cell expressed, developmentally down-regulated gene 4-like                   | -4.13          | 0.01           | 0.80          | ; MEK                         |
| 1417319_at         | Pvr13         | poliovirus receptor-related 3                                                                 | -4.13          | 0.01           | 0.60          | BRAF; MEK                     |
| 1420793_at         | Mup4          | major urinary protein 4                                                                       | -4.13          | 0.01           | 0.88          |                               |
| 1421177_at         | Thap2         | THAP domain containing, apoptosis associated protein 2                                        | -4.13          | 0.01           | 0.77          | ; MEK                         |
| 1436572_at         | Ccdc45        | coiled-coil domain containing 45                                                              | -4.13          | 0.01           | 0.69          | BRAF; MEK                     |
| 1419741_at         | Supt16h       | suppressor of Ty 16 homolog (S. cerevisiae)                                                   | -4.13          | 0.01           | 0.65          | BRAF; MEK                     |
| 1451241_at         | Lamb1-1       | laminin B1 subunit 1                                                                          | -4.14          | 0.01           | 0.39          |                               |
| 1426862_at         | Aftph         | aftiphilin                                                                                    | -4.14          | 0.01           | 0.77          | n.r. ;                        |



| Probeset ID  | Symbol        | Gene Name                                                                          | d-value | q-value | R-fold | Expression reversed by |
|--------------|---------------|------------------------------------------------------------------------------------|---------|---------|--------|------------------------|
| 1452098_at   | Chtf18        | CTF18, chromosome transmission fidelity factor 18 homolog (S. cerevisiae)          | -4.14   | 0.01    | 0.34   | BRAF; MEK              |
| 1448650_a_at | Pole          | polymerase (DNA directed), epsilon                                                 | -4.14   | 0.01    | 0.29   | BRAF; MEK              |
| 1455725_a_at | LOC100045490  | similar to H3 histone, family 3A                                                   | -4.15   | 0.01    | 0.76   | BRAF; MEK              |
| 1427982_s_at | Syne2         | synaptic nuclear envelope 2                                                        | -4.15   | 0.01    | 0.28   | BRAF; MEK              |
| 1425974_a_at | Trim25        | tripartite motif-containing 25                                                     | -4.15   | 0.01    | 0.61   |                        |
| 1426495_at   | 2410042D21Rik | RIKEN cDNA 2410042D21 gene                                                         | -4.15   | 0.01    | 0.76   | n.r. ; n.r.            |
| 1455675_a_at | Tial1         | Tia1 cytotoxic granule-associated RNA binding protein-like 1                       | -4.15   | 0.01    | 0.72   |                        |
| 1451972_at   | LOC100046012  | similar to glucocorticoid induced transcript 1                                     | -4.15   | 0.01    | 0.50   |                        |
| 1459358_at   | NA            | NA                                                                                 | -4.15   | 0.01    | 0.62   | n.r. ; n.r.            |
| 1448103_s_at | Nono          | non-POU-domain-containing, octamer binding protein                                 | -4.15   | 0.01    | 0.76   | BRAF; MEK              |
| 1415913_at   | Rps13         | ribosomal protein S13                                                              | -4.16   | 0.01    | 0.75   |                        |
| 1437516_at   | NA            | NA                                                                                 | -4.16   | 0.01    | 0.74   | ; n.r.                 |
| 1429832_at   | Ppih          | peptidyl prolyl isomerase H                                                        | -4.16   | 0.01    | 0.66   | BRAF; MEK              |
| 1416393_at   | Emg1          | EMG1 nucleolar protein homolog (S. cerevisiae)                                     | -4.16   | 0.01    | 0.67   | BRAF; MEK              |
| 1423161_s_at | Spred1        | sprouty protein with EVH-1 domain 1, related sequence                              | -4.16   | 0.01    | 0.64   |                        |
| 1424089_a_at | Tcf4          | transcription factor 4                                                             | -4.16   | 0.01    | 0.59   | ; MEK                  |
| 1415899_at   | Junb          | Jun-B oncogene                                                                     | -4.16   | 0.01    | 0.38   | BRAF; MEK              |
| 1448029_at   | Tbx3          | T-box 3                                                                            | -4.16   | 0.01    | 0.56   | BRAF; MEK              |
| 1434419_s_at | Tardbp        | TAR DNA binding protein                                                            | -4.16   | 0.01    | 0.72   |                        |
| 1437032_x_at | Rbm14         | RNA binding motif protein 14                                                       | -4.16   | 0.01    | 0.67   | BRAF; MEK              |
| 1428073_a_at | Nup88         | nucleoporin 88                                                                     | -4.16   | 0.01    | 0.79   | BRAF; MEK              |
| 1433697_at   | Pat1          | protein associated with topoisomerase II homolog 1 (yeast)                         | -4.16   | 0.01    | 0.78   | BRAF; MEK              |
| 1455915_at   | Galnt4        | UDP-N-acetyl-alpha-D-galactosamine:polypeptide N-acetylgalactosaminyltransferase 4 | -4.17   | 0.01    | 0.65   | BRAF                   |
| 1423460_at   | Gigyf1        | GRB10 interacting GYF protein 1                                                    | -4.17   | 0.01    | 0.79   | BRAF; MEK              |
| 1433543_at   | Anln          | anillin, actin binding protein                                                     | -4.17   | 0.01    | 0.35   | BRAF; MEK              |
| 1455206_at   | NA            | NA                                                                                 | -4.17   | 0.01    | 0.62   | BRAF; MEK              |
| 1444342_at   | Nup155        | nucleoporin 155                                                                    | -4.17   | 0.01    | 0.63   | BRAF; MEK              |
| 1426613_a_at | Snrpb2        | U2 small nuclear ribonucleoprotein B                                               | -4.17   | 0.01    | 0.73   | BRAF; MEK              |
| 1424469_a_at | Cpsf4         | cleavage and polyadenylation specific factor 4                                     | -4.17   | 0.01    | 0.68   | BRAF; MEK              |
| 1427685_a_at | Synj2         | synaptojanin 2                                                                     | -4.17   | 0.01    | 0.38   | BRAF                   |
| 1417166_at   | Psip1         | PC4 and SFRS1 interacting protein 1                                                | -4.17   | 0.01    | 0.50   | BRAF; MEK              |
| 1450077_at   | Chd1          | chromodomain helicase DNA binding protein 1                                        | -4.17   | 0.01    | 0.60   |                        |
| 1437389_x_at | Khdrbs1       | KH domain containing, RNA binding, signal transduction associated 1                | -4.17   | 0.01    | 0.61   | BRAF; MEK              |
| 1452999_at   | Smndc1        | survival motor neuron domain containing 1                                          | -4.17   | 0.01    | 0.80   | BRAF                   |
| 1423517_at   | LOC100038887  | hypothetical protein LOC100038887                                                  | -4.17   | 0.01    | 0.80   | BRAF; MEK              |
| 1437051_at   | Dffb          | DNA fragmentation factor, beta subunit                                             | -4.17   | 0.01    | 0.81   |                        |
| 1428529_at   | 2810026P18Rik | RIKEN cDNA 2810026P18 gene                                                         | -4.17   | 0.01    | 0.69   | ; MEK                  |
| 1420530_at   | Dpf1          | D4, zinc and double PHD fingers family 1                                           | -4.18   | 0.01    | 0.72   | BRAF; MEK              |
| 1452046_a_at | Ppp1cc        | protein phosphatase 1, catalytic subunit, gamma isoform                            | -4.18   | 0.01    | 0.71   |                        |
| 1425306_at   | BC027072      | cDNA sequence BC027072                                                             | -4.18   | 0.01    | 0.86   | ; MEK                  |
| 1452606_at   | Mnd1          | meiotic nuclear divisions 1 homolog (S. cerevisiae)                                | -4.18   | 0.01    | 0.51   | BRAF; MEK              |
| 1451273_x_at | Ftsjd1        | FtsJ methyltransferase domain containing 1                                         | -4.18   | 0.01    | 0.72   | BRAF                   |
| 1418274_at   | Nutf2         | nuclear transport factor 2                                                         | -4.18   | 0.01    | 0.73   | BRAF                   |
| 1426086_a_at | Fmr1          | fragile X mental retardation syndrome 1 homolog                                    | -4.18   | 0.01    | 0.36   | n.r. ; n.r.            |
| 1431873_a_at | Tube1         | epsilon-tubulin 1                                                                  | -4.18   | 0.01    | 0.48   | BRAF                   |
| 1416559_at   | 1500003O22Rik | RIKEN cDNA 1500003O22 gene                                                         | -4.18   | 0.01    | 0.61   | BRAF                   |
| 1423269_a_at | Nedd4l        | neural precursor cell expressed, developmentally down-regulated gene 4-like        | -4.18   | 0.01    | 0.63   | ; MEK                  |
| 1425747_at   | Dock5         | dedicator of cytokinesis 5                                                         | -4.18   | 0.01    | 0.44   | ; MEK                  |
| 1444443_at   | NA            | NA                                                                                 | -4.18   | 0.01    | 0.76   | ; MEK                  |
| 1434966_at   | Sfrs8         | splicing factor, arginine/serine-rich 8                                            | -4.18   | 0.01    | 0.74   |                        |
| 1416798_a_at | Nme4          | non-metastatic cells 4, protein expressed in                                       | -4.18   | 0.01    | 0.62   | BRAF                   |
| 1459740_s_at | Ucp2          | uncoupling protein 2 (mitochondrial, proton carrier)                               | -4.19   | 0.01    | 0.72   | ; MEK                  |
| 1423192_at   | Pspc1         | paraspeckle protein 1                                                              | -4.19   | 0.01    | 0.60   | ; MEK                  |
| 1434182_at   | Ddx31         | DEAD/H (Asp-Glu-Ala-Asp/His) box polypeptide 31                                    | -4.19   | 0.01    | 0.78   |                        |

| <b>Probeset ID</b> | <b>Symbol</b> | <b>Gene Name</b>                                                                            | <b>d-value</b> | <b>q-value</b> | <b>R-fold</b> | <b>Expression reversed by</b> |
|--------------------|---------------|---------------------------------------------------------------------------------------------|----------------|----------------|---------------|-------------------------------|
| 1435645_at         | Mmd           | monocyte to macrophage differentiation-associated                                           | -4.19          | 0.01           | 0.52          | ; MEK                         |
| 1456005_a_at       | Bcl2l11       | BCL2-like 11 (apoptosis facilitator)                                                        | -4.19          | 0.01           | 0.45          | BRAF                          |
| 1443814_x_at       | Ctsh          | cathepsin H                                                                                 | -4.19          | 0.01           | 0.59          | BRAF                          |
| 1429508_at         | 2310057M21Rik | RIKEN cDNA 2310057M21 gene                                                                  | -4.19          | 0.01           | 0.81          |                               |
| 1435923_at         | Ado           | 2-aminoethanethiol (cysteamine) dioxygenase                                                 | -4.19          | 0.01           | 0.74          | BRAF; MEK                     |
| 1426799_at         | Rab8b         | RAB8B. member RAS oncogene family                                                           | -4.19          | 0.01           | 0.73          | ; MEK                         |
| 1438447_at         | Ddx11         | DEAD/H (Asp-Glu-Ala-Asp/His) box polypeptide 11 (CHL1-like helicase homolog. S. cerevisiae) | -4.19          | 0.01           | 0.55          |                               |
| 1419239_at         | Zfp54         | zinc finger protein 54                                                                      | -4.19          | 0.01           | 0.64          |                               |
| 1439648_at         | Anln          | anillin. actin binding protein                                                              | -4.19          | 0.01           | 0.51          | BRAF; MEK                     |
| 1452816_at         | Mlf1ip        | myeloid leukemia factor 1 interacting protein                                               | -4.20          | 0.01           | 0.72          | ; MEK                         |
| 1426897_at         | Rcc2          | regulator of chromosome condensation 2                                                      | -4.20          | 0.01           | 0.62          | BRAF; MEK                     |
| 1455988_a_at       | LOC100038887  | hypothetical protein LOC100038887                                                           | -4.20          | 0.01           | 0.77          | BRAF; MEK                     |
| 1427258_at         | Trim24        | tripartite motif-containing 24                                                              | -4.20          | 0.01           | 0.61          | BRAF; MEK                     |
| 1456325_at         | Cep68         | centrosomal protein 68                                                                      | -4.20          | 0.01           | 0.66          | BRAF; MEK                     |
| 1448361_at         | Ttc3          | tetratricopeptide repeat domain 3                                                           | -4.20          | 0.01           | 0.57          | ; MEK                         |
| 1444646_at         | 8430420F16Rik | RIKEN cDNA 8430420F16 gene                                                                  | -4.20          | 0.01           | 0.57          | BRAF; MEK                     |
| 1455899_x_at       | Socs3         | suppressor of cytokine signaling 3                                                          | -4.20          | 0.01           | 0.40          | BRAF; MEK                     |
| 1417434_at         | Gpd2          | glycerol phosphate dehydrogenase 2. mitochondrial                                           | -4.20          | 0.01           | 0.65          | BRAF; MEK                     |
| 1428827_at         | Whsc1         | Wolf-Hirschhorn syndrome candidate 1 (human)                                                | -4.20          | 0.01           | 0.36          | BRAF; MEK                     |
| 1440263_at         | Nrp           | neural regeneration protein                                                                 | -4.20          | 0.01           | 0.62          |                               |
| 1418424_at         | Tnfaip6       | tumor necrosis factor alpha induced protein 6                                               | -4.20          | 0.01           | 0.51          | BRAF; MEK                     |
| 1433631_at         | Eif5          | eukaryotic translation initiation factor 5                                                  | -4.20          | 0.01           | 0.76          |                               |
| 1442519_at         | NA            | NA                                                                                          | -4.21          | 0.01           | 0.73          |                               |
| 1417268_at         | Cd14          | CD14 antigen                                                                                | -4.21          | 0.01           | 0.41          | BRAF; MEK                     |
| 1416150_a_at       | Sfrs3         | splicing factor. arginine/serine-rich 3 (SRp20)                                             | -4.21          | 0.01           | 0.65          | BRAF; MEK                     |
| 1429485_a_at       | Utp11l        | UTP11-like. U3 small nucleolar ribonucleoprotein. (yeast)                                   | -4.21          | 0.01           | 0.76          | ; MEK                         |
| 1416724_x_at       | Tcf4          | transcription factor 4                                                                      | -4.21          | 0.01           | 0.58          | ; MEK                         |
| 1428677_at         | Wdr73         | WD repeat domain 73                                                                         | -4.22          | 0.01           | 0.81          | BRAF; MEK                     |
| 1421750_a_at       | Vbp1          | von Hippel-Lindau binding protein 1                                                         | -4.22          | 0.01           | 0.82          | n.r. ; MEK                    |
| 1423470_at         | Ptbp2         | polypyrimidine tract binding protein 2                                                      | -4.22          | 0.01           | 0.50          | BRAF; MEK                     |
| 1448389_at         | Wdr5          | WD repeat domain 5                                                                          | -4.22          | 0.01           | 0.63          | BRAF                          |
| 1417560_at         | Sfxn1         | sideroflexin 1                                                                              | -4.22          | 0.01           | 0.73          | BRAF; MEK                     |
| 1420406_at         | Peg12         | paternally expressed 12                                                                     | -4.22          | 0.01           | 0.57          | BRAF; n.r.                    |
| 1434120_a_at       | Metap2        | methionine aminopeptidase 2                                                                 | -4.22          | 0.01           | 0.84          | ; MEK                         |
| 1417190_at         | Nampt         | nicotinamide phosphoribosyltransferase                                                      | -4.22          | 0.01           | 0.59          | BRAF; MEK                     |
| 1434242_at         | Usp37         | ubiquitin specific peptidase 37                                                             | -4.22          | 0.01           | 0.58          | BRAF; MEK                     |
| 1438115_a_at       | Slc9a3r1      | solute carrier family 9 (sodium/hydrogen exchanger). member 3 regulator 1                   | -4.22          | 0.01           | 0.53          | BRAF; MEK                     |
| 1435627_x_at       | Marcks1l      | MARCKS-like 1                                                                               | -4.23          | 0.01           | 0.54          | BRAF; MEK                     |
| 1423596_at         | Nek6          | NIMA (never in mitosis gene a)-related expressed kinase 6                                   | -4.23          | 0.01           | 0.69          | ; MEK                         |
| 1416621_at         | Llgl1         | lethal giant larvae homolog 1 (Drosophila)                                                  | -4.23          | 0.01           | 0.57          | BRAF; MEK                     |
| 1455820_x_at       | Scarb1        | scavenger receptor class B. member 1                                                        | -4.23          | 0.01           | 0.51          | BRAF; MEK                     |
| 1425268_a_at       | Pear1         | platelet endothelial aggregation receptor 1                                                 | -4.23          | 0.01           | 0.61          | ; MEK                         |
| 1454957_at         | Nob1          | NIN1/RPN12 binding protein 1 homolog (S. cerevisiae)                                        | -4.23          | 0.01           | 0.80          | BRAF; MEK                     |
| 1417736_at         | Smc6          | structural maintenance of chromosomes 6                                                     | -4.23          | 0.01           | 0.55          | n.r. ; n.r.                   |
| 1460420_a_at       | Egfr          | epidermal growth factor receptor                                                            | -4.23          | 0.01           | 0.71          |                               |
| 1453600_at         | Ccdc18        | coiled-coil domain containing 18                                                            | -4.23          | 0.01           | 0.67          | BRAF; MEK                     |
| 1448778_at         | Sfrs4         | splicing factor. arginine/serine-rich 4 (SRp75)                                             | -4.24          | 0.01           | 0.52          | BRAF; MEK                     |
| 1452833_at         | Rapgef2       | Rap guanine nucleotide exchange factor (GEF) 2                                              | -4.24          | 0.01           | 0.68          | BRAF; MEK                     |
| 1449158_at         | Kcnk2         | potassium channel. subfamily K. member 2                                                    | -4.24          | 0.01           | 0.37          | BRAF; MEK                     |
| 1416461_at         | Caprin1       | cell cycle associated protein 1                                                             | -4.24          | 0.01           | 0.74          | ; MEK                         |
| 1446760_at         | Trip13        | thyroid hormone receptor interactor 13                                                      | -4.24          | 0.01           | 0.79          | BRAF; MEK                     |
| 1437375_at         | NA            | NA                                                                                          | -4.24          | 0.01           | 0.73          | ; MEK                         |
| 1425336_x_at       | H2-K1         | histocompatibility 2. K1. K region                                                          | -4.24          | 0.01           | 0.38          | ; MEK                         |
| 1454984_at         | Lifr          | leukemia inhibitory factor receptor                                                         | -4.24          | 0.01           | 0.42          | BRAF; MEK                     |
| 1456261_at         | Sh3kbp1       | SH3-domain kinase binding protein 1                                                         | -4.24          | 0.01           | 0.40          | BRAF; MEK                     |

| <b>Probeset ID</b> | <b>Symbol</b> | <b>Gene Name</b>                                               | <b>d-value</b> | <b>q-value</b> | <b>R-fold</b> | <b>Expression reversed by</b> |
|--------------------|---------------|----------------------------------------------------------------|----------------|----------------|---------------|-------------------------------|
| 1439403_x_at       | Rnf12         | ring finger protein 12                                         | -4.24          | 0.01           | 0.69          | ; MEK                         |
| 1452128_a_at       | Brcc3         | BRCA1/BRCA2-containing complex. subunit 3                      | -4.25          | 0.01           | 0.77          | n.r. ; MEK                    |
| 1450333_a_at       | Gata2         | GATA binding protein 2                                         | -4.25          | 0.01           | 0.62          | BRAF; MEK                     |
| 1426838_at         | Pold3         | polymerase (DNA-directed). delta 3. accessory subunit          | -4.25          | 0.01           | 0.64          | BRAF; MEK                     |
| 1451266_at         | Mrpl50        | mitochondrial ribosomal protein L50                            | -4.25          | 0.01           | 0.75          |                               |
| 1431287_at         | Pcm1          | pericentriolar material 1                                      | -4.25          | 0.01           | 0.67          | ; MEK                         |
| 1439459_x_at       | Acly          | ATP citrate lyase                                              | -4.25          | 0.01           | 0.81          | BRAF; MEK                     |
| 1449254_at         | Spp1          | secreted phosphoprotein 1                                      | -4.25          | 0.01           | 0.27          | BRAF; MEK                     |
| 1454914_at         | 2610101N10Rik | RIKEN cDNA 2610101N10 gene                                     | -4.25          | 0.01           | 0.71          | BRAF; MEK                     |
| 1424020_at         | Arl6ip6       | ADP-ribosylation factor-like 6 interacting protein 6           | -4.25          | 0.01           | 0.67          | BRAF; MEK                     |
| 1452856_at         | Crebzf        | CREB/ATF bZIP transcription factor                             | -4.26          | 0.01           | 0.73          |                               |
| 1418330_at         | Ctcf          | CCCTC-binding factor                                           | -4.26          | 0.01           | 0.68          | BRAF; MEK                     |
| 1460643_at         | Ell           | elongation factor RNA polymerase II                            | -4.26          | 0.01           | 0.63          | BRAF; MEK                     |
| 1415909_at         | Stip1         | stress-induced phosphoprotein 1                                | -4.26          | 0.01           | 0.69          | BRAF; MEK                     |
| 1434512_x_at       | Sfrs3         | splicing factor. arginine/serine-rich 3 (SRp20)                | -4.26          | 0.01           | 0.69          | BRAF; MEK                     |
| 1438089_a_at       | Bclaf1        | BCL2-associated transcription factor 1                         | -4.26          | 0.01           | 0.56          | n.r. ;                        |
| 1422823_at         | Eps8          | epidermal growth factor receptor pathway substrate 8           | -4.26          | 0.01           | 0.41          | BRAF; MEK                     |
| 1433474_at         | Edil3         | EGF-like repeats and discoidin I-like domains 3                | -4.26          | 0.01           | 0.56          | BRAF; MEK                     |
| 1456359_at         | Ppwd1         | peptidylprolyl isomerase domain and WD repeat containing 1     | -4.26          | 0.01           | 0.66          |                               |
| 1456700_x_at       | Marcks        | myristoylated alanine rich protein kinase C substrate          | -4.26          | 0.01           | 0.59          | BRAF; MEK                     |
| 1442911_at         | Riok2         | RIO kinase 2 (yeast)                                           | -4.27          | 0.01           | 0.62          | ; MEK                         |
| 1454993_a_at       | Sfrs3         | splicing factor. arginine/serine-rich 3 (SRp20)                | -4.27          | 0.01           | 0.66          | BRAF; MEK                     |
| 1423511_at         | Asf1a         | ASF1 anti-silencing function 1 homolog A (S. cerevisiae)       | -4.27          | 0.01           | 0.74          | BRAF; MEK                     |
| 1417140_a_at       | Ptpn2         | protein tyrosine phosphatase. non-receptor type 2              | -4.27          | 0.01           | 0.62          | ; MEK                         |
| 1452253_at         | Crim1         | cysteine rich transmembrane BMP regulator 1 (chordin like)     | -4.27          | 0.01           | 0.58          |                               |
| 1450420_at         | Stag1         | stromal antigen 1                                              | -4.27          | 0.01           | 0.70          | BRAF; MEK                     |
| 1450744_at         | Eil2          | elongation factor RNA polymerase II 2                          | -4.27          | 0.01           | 0.68          | n.r. ; n.r.                   |
| 1442135_at         | Ado           | 2-aminoethanethiol (cysteamine) dioxygenase                    | -4.27          | 0.01           | 0.66          | BRAF; MEK                     |
| 1454042_a_at       | Srpk1         | serine/arginine-rich protein specific kinase 1                 | -4.27          | 0.01           | 0.67          | BRAF; MEK                     |
| 1448834_at         | Foxm1         | forkhead box M1                                                | -4.27          | 0.01           | 0.36          | BRAF; MEK                     |
| 1460667_at         | U90926        | cDNA sequence U90926                                           | -4.27          | 0.01           | 0.17          | BRAF; MEK                     |
| 1421274_at         | Socs4         | suppressor of cytokine signaling 4                             | -4.27          | 0.01           | 0.77          |                               |
| 1418308_at         | Hus1          | Hus1 homolog (S. pombe)                                        | -4.27          | 0.01           | 0.67          |                               |
| 1424572_a_at       | H2afy         | H2A histone family. member Y                                   | -4.28          | 0.01           | 0.70          | BRAF                          |
| 1417250_at         | Rnf12         | ring finger protein 12                                         | -4.28          | 0.01           | 0.70          | ; MEK                         |
| 1424787_a_at       | Nrf1          | nuclear respiratory factor 1                                   | -4.28          | 0.01           | 0.66          | ; n.r.                        |
| 1416442_at         | Ier2          | immediate early response 2                                     | -4.28          | 0.01           | 0.55          | BRAF                          |
| 1433482_a_at       | Fubp1         | far upstream element (FUSE) binding protein 1                  | -4.28          | 0.01           | 0.53          | BRAF; MEK                     |
| 1431182_at         | Hspa8         | heat shock protein 8                                           | -4.28          | 0.01           | 0.52          | BRAF; MEK                     |
| 1422613_a_at       | Rpl7a         | ribosomal protein L7a                                          | -4.28          | 0.01           | 0.91          | BRAF                          |
| 1443171_at         | NA            | NA                                                             | -4.28          | 0.01           | 0.61          | ; MEK                         |
| 1448774_at         | Stoml2        | stomatin (Epb7.2)-like 2                                       | -4.28          | 0.01           | 0.56          | BRAF; MEK                     |
| 1448129_at         | Arpc5         | actin related protein 2/3 complex. subunit 5                   | -4.28          | 0.01           | 0.74          | n.r. ; n.r.                   |
| 1418017_at         | Pum2          | pumilio 2 (Drosophila)                                         | -4.28          | 0.01           | 0.72          | ; MEK                         |
| 1419613_at         | Col7a1        | collagen. type VII. alpha 1                                    | -4.29          | 0.01           | 0.41          | BRAF                          |
| 1423186_at         | Tiam2         | T-cell lymphoma invasion and metastasis 2                      | -4.29          | 0.01           | 0.47          | BRAF; MEK                     |
| 1427253_s_at       | Suz12         | suppressor of zeste 12 homolog (Drosophila)                    | -4.29          | 0.01           | 0.55          | BRAF; MEK                     |
| 1419690_at         | 2610002M06Rik | RIKEN cDNA 2610002M06 gene                                     | -4.29          | 0.01           | 0.79          | BRAF                          |
| 1416918_at         | Dlg3          | discs. large homolog 3 (Drosophila)                            | -4.29          | 0.01           | 0.64          | BRAF; MEK                     |
| 1427260_a_at       | Tpm3          | tropomyosin 3. gamma                                           | -4.29          | 0.01           | 0.82          | ; MEK                         |
| 1437626_at         | Zfp36l2       | zinc finger protein 36. C3H type-like 2                        | -4.29          | 0.01           | 0.60          | BRAF; MEK                     |
| 1448703_at         | Lsm8          | LSM8 homolog. U6 small nuclear RNA associated (S. cerevisiae)  | -4.29          | 0.01           | 0.60          | BRAF; MEK                     |
| 1426931_s_at       | D19Bwg1357e   | DNA segment. Chr 19. Brigham & Women's Genetics 1357 expressed | -4.29          | 0.01           | 0.62          | BRAF                          |
| 1431226_a_at       | Fndc4         | fibronectin type III domain containing 4                       | -4.29          | 0.01           | 0.39          | BRAF; MEK                     |
| 1418372_at         | Adsl          | adenylosuccinate lyase                                         | -4.29          | 0.01           | 0.63          | BRAF; MEK                     |
| 1428210_s_at       | Chuk          | conserved helix-loop-helix ubiquitous kinase                   | -4.29          | 0.01           | 0.69          |                               |

| <b>Probeset ID</b> | <b>Symbol</b> | <b>Gene Name</b>                                                                                                                    | <b>d-value</b> | <b>q-value</b> | <b>R-fold</b> | <b>Expression reversed by</b> |
|--------------------|---------------|-------------------------------------------------------------------------------------------------------------------------------------|----------------|----------------|---------------|-------------------------------|
| 1415785_a_at       | Cct8          | chaperonin containing Tcp1. subunit 8 (theta)                                                                                       | -4.29          | 0.01           | 0.72          | ; n.r.                        |
| 1423050_s_at       | Hnmpu         | heterogeneous nuclear ribonucleoprotein U                                                                                           | -4.30          | 0.01           | 0.75          | BRAF                          |
| 1460544_at         | Mak10         | MAK10 homolog. amino-acid N-acetyltransferase subunit. (S. cerevisiae)                                                              | -4.30          | 0.01           | 0.75          | BRAF                          |
| 1455732_at         | 2610510E02Rik | RIKEN cDNA 2610510E02 gene                                                                                                          | -4.30          | 0.01           | 0.53          | BRAF; MEK                     |
| 1460062_at         | Plekhh2       | pleckstrin homology domain containing. family H (with MyTH4 domain) member 2                                                        | -4.30          | 0.01           | 0.62          | ; MEK                         |
| 1429942_at         | Gmeb1         | glucocorticoid modulatory element binding protein 1                                                                                 | -4.30          | 0.01           | 0.73          | BRAF; MEK                     |
| 1433998_at         | 4933427D14Rik | RIKEN cDNA 4933427D14 gene                                                                                                          | -4.31          | 0.01           | 0.69          | BRAF; MEK                     |
| 1425617_at         | Dhx9          | DEAH (Asp-Glu-Ala-His) box polypeptide 9                                                                                            | -4.31          | 0.01           | 0.45          | BRAF; MEK                     |
| 1437244_at         | Gas2l3        | growth arrest-specific 2 like 3                                                                                                     | -4.31          | 0.01           | 0.42          | BRAF; MEK                     |
| 1419522_at         | Zmynd19       | zinc finger. MYND domain containing 19                                                                                              | -4.31          | 0.01           | 0.68          |                               |
| 1415917_at         | Mthfd1        | methylenetetrahydrofolate dehydrogenase (NADP+ dependent). methenyltetrahydrofolate cyclohydrolase. formyltetrahydrofolate synthase | -4.31          | 0.01           | 0.57          | BRAF; MEK                     |
| 1434525_at         | Pkn3          | protein kinase N3                                                                                                                   | -4.31          | 0.01           | 0.74          | BRAF; MEK                     |
| 1430286_s_at       | LOC100043766  | Ppp1r14c pseudogene                                                                                                                 | -4.32          | 0.01           | 0.67          | ; MEK                         |
| 1451244_a_at       | Zfp422        | zinc finger protein 422                                                                                                             | -4.32          | 0.01           | 0.62          | BRAF; MEK                     |
| 1418822_a_at       | Arf6          | ADP-ribosylation factor 6                                                                                                           | -4.32          | 0.01           | 0.75          | BRAF; MEK                     |
| 1457118_at         | Eid1          | EP300 interacting inhibitor of differentiation 1                                                                                    | -4.32          | 0.01           | 0.71          | BRAF; MEK                     |
| 1426462_at         | Gphn          | gephyrin                                                                                                                            | -4.32          | 0.01           | 0.68          | BRAF; MEK                     |
| 1435390_at         | Exod1         | exonuclease domain containing 1                                                                                                     | -4.32          | 0.01           | 0.51          | BRAF; MEK                     |
| 1427165_at         | Il13ra1       | interleukin 13 receptor. alpha 1                                                                                                    | -4.32          | 0.01           | 0.35          | ; MEK                         |
| 1454750_a_at       | BC057552      | cDNA sequence BC057552                                                                                                              | -4.33          | 0.01           | 0.63          | BRAF; MEK                     |
| 1425733_a_at       | Eps8          | epidermal growth factor receptor pathway substrate 8                                                                                | -4.33          | 0.01           | 0.52          | BRAF; MEK                     |
| 1422955_at         | Syt17         | synaptotagmin XVII                                                                                                                  | -4.33          | 0.01           | 0.62          |                               |
| 1439010_at         | Larp4         | La ribonucleoprotein domain family. member 4                                                                                        | -4.33          | 0.01           | 0.68          | ; MEK                         |
| 1434899_s_at       | Tnrc6a        | trinucleotide repeat containing 6a                                                                                                  | -4.33          | 0.01           | 0.74          | n.r. ; n.r.                   |
| 1453465_x_at       | LOC100043766  | Ppp1r14c pseudogene                                                                                                                 | -4.33          | 0.01           | 0.58          | BRAF                          |
| 1451483_s_at       | 1700054N08Rik | RIKEN cDNA 1700054N08 gene                                                                                                          | -4.33          | 0.01           | 0.70          | BRAF; MEK                     |
| 1422632_at         | Ctsw          | cathepsin W                                                                                                                         | -4.33          | 0.01           | 0.56          | ; n.r.                        |
| 1456566_x_at       | Rbm14         | RNA binding motif protein 14                                                                                                        | -4.34          | 0.01           | 0.59          | BRAF; MEK                     |
| 1435768_at         | Arid4b        | AT rich interactive domain 4B (RBP1-like)                                                                                           | -4.34          | 0.01           | 0.64          |                               |
| 1427064_a_at       | Scrib         | scribbled homolog (Drosophila)                                                                                                      | -4.34          | 0.01           | 0.61          | BRAF; MEK                     |
| 1423773_at         | Gbp1          | GC-rich promoter binding protein 1                                                                                                  | -4.34          | 0.01           | 0.70          | ; MEK                         |
| 1433898_at         | NA            | NA                                                                                                                                  | -4.34          | 0.01           | 0.62          | BRAF; MEK                     |
| 1455980_a_at       | Gas2l3        | growth arrest-specific 2 like 3                                                                                                     | -4.34          | 0.01           | 0.36          | BRAF; MEK                     |
| 1451356_at         | Anp32e        | acidic (leucine-rich) nuclear phosphoprotein 32 family. member E                                                                    | -4.35          | 0.01           | 0.67          | BRAF; MEK                     |
| 1424620_at         | D13Wsu177e    | DNA segment. Chr 13. Wayne State University 177. expressed                                                                          | -4.35          | 0.01           | 0.67          | BRAF; n.r.                    |
| 1426837_at         | Metap1        | methionyl aminopeptidase 1                                                                                                          | -4.35          | 0.01           | 0.71          |                               |
| 1453769_at         | Ckap2l        | cytoskeleton associated protein 2-like                                                                                              | -4.35          | 0.01           | 0.47          | BRAF                          |
| 1460037_at         | 2610510H03Rik | RIKEN cDNA 2610510H03 gene                                                                                                          | -4.35          | 0.01           | 0.73          | BRAF; MEK                     |
| 1435139_at         | Narg1         | NMDA receptor-regulated gene 1                                                                                                      | -4.35          | 0.01           | 0.70          | ; MEK                         |
| 1416415_a_at       | H2afz         | H2A histone family. member Z                                                                                                        | -4.35          | 0.01           | 0.63          | BRAF; MEK                     |
| 1455609_at         | Cit           | citron                                                                                                                              | -4.35          | 0.01           | 0.40          | BRAF; MEK                     |
| 1422922_at         | Recql4        | RecQ protein-like 4                                                                                                                 | -4.35          | 0.01           | 0.63          | BRAF; MEK                     |
| 1435826_at         | Rad18         | RAD18 homolog (S. cerevisiae)                                                                                                       | -4.35          | 0.01           | 0.41          | BRAF; MEK                     |
| 1451039_at         | 2610027L16Rik | RIKEN cDNA 2610027L16 gene                                                                                                          | -4.35          | 0.01           | 0.68          | ; n.r.                        |
| 1449633_s_at       | Nt5c3l        | 5'-nucleotidase. cytosolic III-like                                                                                                 | -4.36          | 0.01           | 0.60          | BRAF; MEK                     |
| 1425543_s_at       | Plekha5       | pleckstrin homology domain containing. family A member 5                                                                            | -4.36          | 0.01           | 0.46          | BRAF; MEK                     |
| 1449343_s_at       | Sin3a         | transcriptional regulator. SIN3A (yeast)                                                                                            | -4.36          | 0.01           | 0.65          | BRAF; MEK                     |
| 1418022_at         | Narg1         | NMDA receptor-regulated gene 1                                                                                                      | -4.36          | 0.01           | 0.65          | ; MEK                         |
| 1424322_at         | Apex2         | apurinic/apyrimidinic endonuclease 2                                                                                                | -4.36          | 0.01           | 0.62          |                               |
| 1453416_at         | Gas2l3        | growth arrest-specific 2 like 3                                                                                                     | -4.36          | 0.01           | 0.41          | BRAF; MEK                     |
| 1429476_s_at       | Dnaja2        | DnaJ (Hsp40) homolog. subfamily A. member 2                                                                                         | -4.36          | 0.01           | 0.84          | BRAF                          |
| 1416345_at         | Timm8a1       | translocase of inner mitochondrial membrane 8 homolog a1 (yeast)                                                                    | -4.36          | 0.01           | 0.58          | BRAF; MEK                     |
| 1439421_x_at       | Cbx3          | chromobox homolog 3 (Drosophila HP1 gamma)                                                                                          | -4.37          | 0.01           | 0.59          | BRAF; MEK                     |

| <b>Probeset ID</b> | <b>Symbol</b> | <b>Gene Name</b>                                                                            | <b>d-value</b> | <b>q-value</b> | <b>R-fold</b> | <b>Expression reversed by</b> |
|--------------------|---------------|---------------------------------------------------------------------------------------------|----------------|----------------|---------------|-------------------------------|
| 1416585_at         | Ruvb1         | RuvB-like protein 1                                                                         | -4.37          | 0.01           | 0.62          | BRAF; MEK                     |
| 1460220_a_at       | Csf1          | colony stimulating factor 1 (macrophage)                                                    | -4.37          | 0.01           | 0.66          | n.r. ;                        |
| 1434650_at         | Pogz          | pogo transposable element with ZNF domain                                                   | -4.37          | 0.01           | 0.67          | BRAF; MEK                     |
| 1457292_at         | Josd3         | Josephin domain containing 3                                                                | -4.37          | 0.01           | 0.31          | ; MEK                         |
| 1452691_at         | Rbm17         | RNA binding motif protein 17                                                                | -4.37          | 0.01           | 0.68          | ; MEK                         |
| 1442753_at         | Tnfaip8       | tumor necrosis factor. alpha-induced protein 8                                              | -4.37          | 0.01           | 0.72          | BRAF; MEK                     |
| 1448531_at         | Lmnb2         | lamin B2                                                                                    | -4.37          | 0.01           | 0.62          | BRAF; MEK                     |
| 1419260_a_at       | Snrpb         | small nuclear ribonucleoprotein B                                                           | -4.37          | 0.01           | 0.75          | BRAF; MEK                     |
| 1451358_a_at       | Racgap1       | Rac GTPase-activating protein 1                                                             | -4.37          | 0.01           | 0.33          | BRAF; MEK                     |
| 1457708_at         | Mbd4          | methyl-CpG binding domain protein 4                                                         | -4.38          | 0.01           | 0.65          | BRAF; MEK                     |
| 1428546_at         | Syncrip       | synaptotagmin binding. cytoplasmic RNA interacting protein                                  | -4.38          | 0.01           | 0.58          | BRAF; MEK                     |
| 1417697_at         | Soat1         | sterol O-acyltransferase 1                                                                  | -4.38          | 0.01           | 0.55          |                               |
| 1423177_a_at       | Abi1          | abl-interactor 1                                                                            | -4.38          | 0.01           | 0.78          | n.r. ; n.r.                   |
| 1436543_at         | Gtpbp10       | GTP-binding protein 10 (putative)                                                           | -4.38          | 0.01           | 0.55          |                               |
| 1452681_at         | Dtymk         | deoxythymidylate kinase                                                                     | -4.38          | 0.01           | 0.63          | BRAF; MEK                     |
| 1423969_at         | Nup37         | nucleoporin 37                                                                              | -4.38          | 0.01           | 0.54          | BRAF; MEK                     |
| 1438601_at         | Pkmyt1        | protein kinase. membrane associated tyrosine/threonine 1                                    | -4.39          | 0.01           | 0.86          | BRAF                          |
| 1449210_at         | Igf2bp1       | insulin-like growth factor 2 mRNA binding protein 1                                         | -4.39          | 0.01           | 0.64          | BRAF; MEK                     |
| 1437278_a_at       | Uba2          | ubiquitin-like modifier activating enzyme 2                                                 | -4.39          | 0.01           | 0.66          | BRAF; MEK                     |
| 1426682_at         | Cnot6         | CCR4-NOT transcription complex. subunit 6                                                   | -4.39          | 0.01           | 0.65          | BRAF; MEK                     |
| 1421323_a_at       | G3bp2         | GTPase activating protein (SH3 domain) binding protein 2                                    | -4.39          | 0.01           | 0.63          | BRAF; MEK                     |
| 1415817_s_at       | Cct7          | chaperonin containing Tcp1. subunit 7 (eta)                                                 | -4.39          | 0.01           | 0.69          | BRAF                          |
| 1432022_at         | Cdgap         | Cdc42 GTPase-activating protein                                                             | -4.39          | 0.01           | 0.81          |                               |
| 1455260_at         | Lcorl         | ligand dependent nuclear receptor corepressor-like                                          | -4.39          | 0.01           | 0.68          | n.r. ;                        |
| 1416815_s_at       | Bub3          | budding uninhibited by benzimidazoles 3 homolog (S. cerevisiae)                             | -4.40          | 0.01           | 0.74          | BRAF                          |
| 1428970_at         | Nat13         | N-acetyltransferase 13                                                                      | -4.40          | 0.01           | 0.62          | ; n.r.                        |
| 1418036_at         | Prim2         | DNA primase. p58 subunit                                                                    | -4.40          | 0.01           | 0.53          | BRAF; MEK                     |
| 1437280_s_at       | Serbp1        | Serpine1 mRNA binding protein 1                                                             | -4.40          | 0.01           | 0.72          | BRAF; MEK                     |
| 1446272_at         | Pctk2         | PCTAIRE-motif protein kinase 2                                                              | -4.40          | 0.01           | 0.71          |                               |
| 1454737_at         | Dusp9         | dual specificity phosphatase 9                                                              | -4.40          | 0.01           | 0.67          | ; MEK                         |
| 1426783_at         | Kat2a         | K(lysine) acetyltransferase 2A                                                              | -4.40          | 0.01           | 0.68          | BRAF; MEK                     |
| 1424753_at         | Nudt14        | nudix (nucleoside diphosphate linked moiety X)-type motif 14                                | -4.40          | 0.01           | 0.77          | BRAF                          |
| 1431349_at         | Hnmpab        | heterogeneous nuclear ribonucleoprotein A/B                                                 | -4.40          | 0.01           | 0.64          |                               |
| 1423234_at         | Psmc5         | proteasome (prosome. macropain) 26S subunit. non-ATPase. 5                                  | -4.40          | 0.01           | 0.73          |                               |
| 1440882_at         | Lrp8          | low density lipoprotein receptor-related protein 8. apolipoprotein e receptor               | -4.41          | 0.01           | 0.63          | ; MEK                         |
| 1429490_at         | Rif1          | Rap1 interacting factor 1 homolog (yeast)                                                   | -4.41          | 0.01           | 0.43          | BRAF; MEK                     |
| 1445866_at         | Mast4         | microtubule associated serine/threonine kinase family member 4                              | -4.41          | 0.01           | 0.32          | BRAF; MEK                     |
| 1421237_at         | Tmpo          | thymopoietin                                                                                | -4.41          | 0.01           | 0.50          | BRAF                          |
| 1419357_at         | Isy1          | ISY1 splicing factor homolog (S. cerevisiae)                                                | -4.41          | 0.01           | 0.62          | BRAF; MEK                     |
| 1417742_a_at       | Dmap1         | DNA methyltransferase 1-associated protein 1                                                | -4.41          | 0.01           | 0.83          | BRAF; MEK                     |
| 1427397_at         | 2810046L04Rik | RIKEN cDNA 2810046L04 gene                                                                  | -4.41          | 0.01           | 0.67          | ; MEK                         |
| 1440650_at         | NA            | NA                                                                                          | -4.41          | 0.01           | 0.79          |                               |
| 1452760_at         | 2510012J08Rik | RIKEN cDNA 2510012J08 gene                                                                  | -4.41          | 0.01           | 0.74          | BRAF                          |
| 1424895_at         | Gpsm2         | G-protein signalling modulator 2 (AGS3-like. C. elegans)                                    | -4.41          | 0.01           | 0.52          | BRAF; MEK                     |
| 1419102_at         | Sin3a         | transcriptional regulator. SIN3A (yeast)                                                    | -4.42          | 0.01           | 0.57          | BRAF; MEK                     |
| 1435415_x_at       | Marcks1       | MARCKS-like 1                                                                               | -4.42          | 0.01           | 0.58          | BRAF; MEK                     |
| 1433569_x_at       | LOC100045999  | similar to RAN. member RAS oncogene family                                                  | -4.42          | 0.01           | 0.80          | BRAF; MEK                     |
| 1443196_at         | NA            | NA                                                                                          | -4.42          | 0.01           | 0.70          | ; n.r.                        |
| 1418872_at         | Abcb1b        | ATP-binding cassette. sub-family B (MDR/TAP). member 1B                                     | -4.42          | 0.01           | 0.42          | BRAF; MEK                     |
| 1431028_a_at       | Pank1         | pantothenate kinase 1                                                                       | -4.42          | 0.01           | 0.66          | BRAF; MEK                     |
| 1437632_at         | Med14         | mediator complex subunit 14                                                                 | -4.42          | 0.01           | 0.61          | BRAF; MEK                     |
| 1449293_a_at       | Skp2          | S-phase kinase-associated protein 2 (p45)                                                   | -4.42          | 0.01           | 0.44          | BRAF                          |
| 1438545_at         | Slc25a5       | solute carrier family 25 (mitochondrial carrier. adenine nucleotide translocator). member 5 | -4.42          | 0.01           | 0.73          | BRAF                          |
| 1449176_a_at       | Dck           | deoxycytidine kinase                                                                        | -4.42          | 0.01           | 0.46          | BRAF; MEK                     |
| 1448896_at         | Pigf          | phosphatidylinositol glycan anchor biosynthesis. class F                                    | -4.43          | 0.01           | 0.58          | BRAF; MEK                     |



| <b>Probeset ID</b> | <b>Symbol</b> | <b>Gene Name</b>                                                                  | <b>d-value</b> | <b>q-value</b> | <b>R-fold</b> | <b>Expression reversed by</b> |
|--------------------|---------------|-----------------------------------------------------------------------------------|----------------|----------------|---------------|-------------------------------|
| 1449012_s_at       | Fndc4         | fibronectin type III domain containing 4                                          | -4.43          | 0.01           | 0.47          | BRAF; MEK                     |
| 1448484_at         | Amd1          | S-adenosylmethionine decarboxylase 1                                              | -4.43          | 0.01           | 0.69          | BRAF                          |
| 1431233_at         | Cnm4          | cyclin M4                                                                         | -4.43          | 0.01           | 0.56          | BRAF                          |
| 1460391_at         | Ola1          | Obg-like ATPase 1                                                                 | -4.43          | 0.01           | 0.77          | BRAF; MEK                     |
| 1417364_at         | Eef1g         | eukaryotic translation elongation factor 1 gamma                                  | -4.43          | 0.01           | 0.88          | BRAF; MEK                     |
| 1417258_at         | Cct5          | chaperonin containing Tcp1. subunit 5 (epsilon)                                   | -4.43          | 0.01           | 0.76          | BRAF; MEK                     |
| 1428727_at         | Cep192        | centrosomal protein 192                                                           | -4.43          | 0.01           | 0.50          | BRAF; MEK                     |
| 1417662_at         | Elk3          | ELK3. member of ETS oncogene family                                               | -4.43          | 0.01           | 0.59          | ; n.r.                        |
| 1429383_at         | Csnk1g3       | casein kinase 1. gamma 3                                                          | -4.43          | 0.01           | 0.71          | ; MEK                         |
| 1419493_a_at       | Tpd52         | tumor protein D52                                                                 | -4.43          | 0.01           | 0.56          |                               |
| 1434608_at         | Ddx52         | DEAD (Asp-Glu-Ala-Asp) box polypeptide 52                                         | -4.44          | 0.01           | 0.77          |                               |
| 1451884_a_at       | Lsm2          | LSM2 homolog. U6 small nuclear RNA associated (S. cerevisiae)                     | -4.44          | 0.01           | 0.49          | BRAF; MEK                     |
| 1437378_x_at       | Scarb1        | scavenger receptor class B. member 1                                              | -4.44          | 0.01           | 0.54          | BRAF; MEK                     |
| 1448016_at         | Sass6         | spindle assembly 6 homolog (C. elegans)                                           | -4.44          | 0.01           | 0.54          | BRAF; MEK                     |
| 1418629_a_at       | Khdrbs1       | KH domain containing. RNA binding. signal transduction associated 1               | -4.45          | 0.01           | 0.63          | BRAF; MEK                     |
| 1437395_at         | Zcchc11       | zinc finger. CCHC domain containing 11                                            | -4.45          | 0.01           | 0.50          | BRAF; MEK                     |
| 1451391_at         | 2700050L05Rik | RIKEN cDNA 2700050L05 gene                                                        | -4.45          | 0.01           | 0.82          | ; MEK                         |
| 1455330_at         | Nol9          | nucleolar protein 9                                                               | -4.45          | 0.01           | 0.66          | BRAF; MEK                     |
| 1455760_at         | Slc9a5        | solute carrier family 9 (sodium/hydrogen exchanger). member 5                     | -4.45          | 0.01           | 0.53          | BRAF; MEK                     |
| 1437193_s_at       | Snrpb         | small nuclear ribonucleoprotein B                                                 | -4.45          | 0.01           | 0.75          | BRAF; MEK                     |
| 1448151_at         | Elavl1        | ELAV (embryonic lethal. abnormal vision. Drosophila)-like 1 (Hu antigen R)        | -4.45          | 0.01           | 0.66          | BRAF; MEK                     |
| 1421141_a_at       | Foxp1         | forkhead box P1                                                                   | -4.45          | 0.01           | 0.60          | ; n.r.                        |
| 1417962_s_at       | Ghr           | growth hormone receptor                                                           | -4.45          | 0.01           | 0.59          | BRAF; MEK                     |
| 1420368_at         | Denr          | density-regulated protein                                                         | -4.45          | 0.01           | 0.59          | ; MEK                         |
| 1437226_x_at       | Marcks1       | MARCKS-like 1                                                                     | -4.46          | 0.01           | 0.43          | BRAF; MEK                     |
| 1460378_a_at       | Tes           | testis derived transcript                                                         | -4.46          | 0.01           | 0.35          | BRAF; MEK                     |
| 1431166_at         | Chd1          | chromodomain helicase DNA binding protein 1                                       | -4.46          | 0.01           | 0.50          | BRAF; MEK                     |
| 1452047_at         | Cacybp        | calcylin binding protein                                                          | -4.46          | 0.01           | 0.76          |                               |
| 1423303_at         | Paxip1        | PAX interacting (with transcription-activation domain) protein 1                  | -4.46          | 0.01           | 0.58          | BRAF; MEK                     |
| 1449323_a_at       | Rpl3          | ribosomal protein L3                                                              | -4.46          | 0.01           | 0.84          | BRAF; MEK                     |
| 1438096_a_at       | Dtymk         | deoxythymidylate kinase                                                           | -4.46          | 0.01           | 0.59          | BRAF; MEK                     |
| 1428146_s_at       | Acaa2         | acetyl-Coenzyme A acyltransferase 2 (mitochondrial 3-oxoacyl-Coenzyme A thiolase) | -4.46          | 0.01           | 0.64          | BRAF; MEK                     |
| 1450414_at         | Pdgfb         | platelet derived growth factor. B polypeptide                                     | -4.47          | 0.01           | 0.33          | n.r. ; MEK                    |
| 1438951_x_at       | Nup54         | nucleoporin 54                                                                    | -4.47          | 0.01           | 0.73          | BRAF; MEK                     |
| 1428834_at         | Dusp4         | dual specificity phosphatase 4                                                    | -4.47          | 0.01           | 0.41          | BRAF                          |
| 1417403_at         | Elovl6        | ELOVL family member 6. elongation of long chain fatty acids (yeast)               | -4.47          | 0.01           | 0.50          | ; MEK                         |
| 1429002_at         | Snw1          | SNW domain containing 1                                                           | -4.47          | 0.01           | 0.79          | BRAF; MEK                     |
| 1421546_a_at       | Racgap1       | Rac GTPase-activating protein 1                                                   | -4.47          | 0.01           | 0.33          | BRAF; MEK                     |
| 1460573_at         | AI848100      | expressed sequence AI848100                                                       | -4.47          | 0.01           | 0.72          | n.r. ; MEK                    |
| 1419543_a_at       | Sfrs10        | splicing factor. arginine/serine-rich 10 (transformer 2 homolog. Drosophila)      | -4.48          | 0.01           | 0.60          |                               |
| 1428224_at         | HnrpdI        | heterogeneous nuclear ribonucleoprotein D-like                                    | -4.48          | 0.01           | 0.57          | BRAF; MEK                     |
| 1427441_a_at       | Sucg2         | succinate-Coenzyme A ligase. GDP-forming. beta subunit                            | -4.48          | 0.01           | 0.58          | BRAF; MEK                     |
| 1416439_at         | 2410015N17Rik | RIKEN cDNA 2410015N17 gene                                                        | -4.48          | 0.01           | 0.54          | BRAF; MEK                     |
| 1418225_at         | Orc2l         | origin recognition complex. subunit 2-like (S. cerevisiae)                        | -4.48          | 0.01           | 0.72          | BRAF; MEK                     |
| 1435737_a_at       | Nde1          | nuclear distribution gene E homolog 1 (A nidulans)                                | -4.48          | 0.01           | 0.75          | BRAF; MEK                     |
| 1436813_x_at       | Khsrp         | KH-type splicing regulatory protein                                               | -4.48          | 0.01           | 0.72          | BRAF; MEK                     |
| 1423827_s_at       | Noc4l         | nucleolar complex associated 4 homolog (S. cerevisiae)                            | -4.48          | 0.01           | 0.63          | BRAF; MEK                     |
| 1436816_at         | Nup133        | nucleoporin 133                                                                   | -4.49          | 0.01           | 0.56          | BRAF; MEK                     |
| 1430536_a_at       | Erh           | enhancer of rudimentary homolog (Drosophila)                                      | -4.49          | 0.01           | 0.69          | BRAF; MEK                     |
| 1434876_at         | Glt8d3        | glycosyltransferase 8 domain containing 3                                         | -4.49          | 0.01           | 0.69          | ; MEK                         |
| 1429538_a_at       | Sfrs18        | splicing factor. arginine/serine-rich 18                                          | -4.49          | 0.01           | 0.55          | ; MEK                         |
| 1434278_at         | Mtm1          | X-linked myotubular myopathy gene 1                                               | -4.49          | 0.01           | 0.56          | BRAF; MEK                     |
| 1458130_at         | NA            | NA                                                                                | -4.49          | 0.01           | 0.57          | ; MEK                         |
| 1437130_at         | EG432879      | predicted gene. EG432879                                                          | -4.49          | 0.01           | 0.80          | BRAF; MEK                     |

| <b>Probeset ID</b>           | <b>Symbol</b> | <b>Gene Name</b>                                                         | <b>d-value</b> | <b>q-value</b> | <b>R-fold</b> | <b>Expression reversed by</b> |
|------------------------------|---------------|--------------------------------------------------------------------------|----------------|----------------|---------------|-------------------------------|
| 1416933_at                   | Por           | P450 (cytochrome) oxidoreductase                                         | -4.49          | 0.01           | 0.67          | BRAF; MEK                     |
| AFFX-TransRecMur/X57349_3_at | Tfrc          | transferrin receptor                                                     | -4.49          | 0.01           | 0.30          | ; n.r.                        |
| 1450948_a_at                 | Mrpl1         | mitochondrial ribosomal protein L1                                       | -4.49          | 0.01           | 0.73          | ; MEK                         |
| 1435349_at                   | Nrp2          | neuropilin 2                                                             | -4.49          | 0.01           | 0.25          | BRAF; MEK                     |
| 1434938_at                   | Rbm9          | RNA binding motif protein 9                                              | -4.49          | 0.01           | 0.68          | BRAF; MEK                     |
| 1435474_at                   | Taf5          | TAF5 RNA polymerase II. TATA box binding protein (TBP)-associated factor | -4.50          | 0.01           | 0.61          | BRAF; MEK                     |
| 1449056_at                   | E330009J07Rik | RIKEN cDNA E330009J07 gene                                               | -4.50          | 0.01           | 0.48          | BRAF; MEK                     |
| 1423479_at                   | Nol11         | nucleolar protein 11                                                     | -4.50          | 0.01           | 0.61          | BRAF                          |
| 1446226_at                   | Fancc         | Fanconi anemia. complementation group B                                  | -4.50          | 0.01           | 0.72          | BRAF                          |
| 1420609_at                   | 07-mar        | membrane-associated ring finger (C3HC4) 7                                | -4.50          | 0.01           | 0.71          | n.r. ; MEK                    |
| 1420441_at                   | Cenpc1        | centromere protein C1                                                    | -4.50          | 0.01           | 0.62          | BRAF; MEK                     |
| 1428691_at                   | Chd2          | chromodomain helicase DNA binding protein 2                              | -4.50          | 0.01           | 0.79          | BRAF; MEK                     |
| 1450738_at                   | Kif21a        | kinesin family member 21A                                                | -4.51          | 0.01           | 0.62          | BRAF; MEK                     |
| 1456865_x_at                 | Rrs1          | RRS1 ribosome biogenesis regulator homolog (S. cerevisiae)               | -4.51          | 0.01           | 0.57          | BRAF; MEK                     |
| 1455102_at                   | Larp4         | La ribonucleoprotein domain family. member 4                             | -4.51          | 0.01           | 0.62          | n.r. ;                        |
| 1436475_at                   | Nr2f2         | nuclear receptor subfamily 2. group F. member 2                          | -4.51          | 0.01           | 0.65          |                               |
| 1423761_at                   | 5630401D24Rik | RIKEN cDNA 5630401D24 gene                                               | -4.51          | 0.01           | 0.69          |                               |
| 1455562_at                   | Sox12         | SRY-box containing gene 12                                               | -4.52          | 0.01           | 0.83          |                               |
| 1452124_at                   | Ank3          | ankyrin 3. epithelial                                                    | -4.52          | 0.01           | 0.41          | BRAF; MEK                     |
| 1454094_at                   | 4930471E19Rik | RIKEN cDNA 4930471E19 gene                                               | -4.52          | 0.01           | 0.63          | ; MEK                         |
| 1427413_a_at                 | Cugbp1        | CUG triplet repeat. RNA binding protein 1                                | -4.52          | 0.01           | 0.66          |                               |
| 1415682_at                   | Xpo7          | exportin 7                                                               | -4.52          | 0.01           | 0.74          | ; MEK                         |
| 1433622_at                   | Gemin4        | gem (nuclear organelle) associated protein 4                             | -4.52          | 0.01           | 0.65          | BRAF; MEK                     |
| 1423809_at                   | Tcf19         | transcription factor 19                                                  | -4.52          | 0.01           | 0.40          | BRAF; MEK                     |
| 1421751_a_at                 | Psmc14        | proteasome (prosome. macropain) 26S subunit. non-ATPase. 14              | -4.52          | 0.01           | 0.82          | ; MEK                         |
| 1452337_at                   | 4930427A07Rik | RIKEN cDNA 4930427A07 gene                                               | -4.53          | 0.01           | 0.60          | BRAF; MEK                     |
| 1423617_at                   | Pdf           | peptide deformylase (mitochondrial)                                      | -4.53          | 0.01           | 0.74          | BRAF; MEK                     |
| 1447924_at                   | Nucks1        | nuclear casein kinase and cyclin-dependent kinase substrate 1            | -4.53          | 0.01           | 0.57          |                               |
| 1452454_at                   | Sdad1         | SDA1 domain containing 1                                                 | -4.53          | 0.01           | 0.60          | BRAF; MEK                     |
| 1433585_at                   | Tnpo1         | transportin 1                                                            | -4.53          | 0.01           | 0.68          | BRAF                          |
| 1452180_at                   | Phf17         | PHD finger protein 17                                                    | -4.53          | 0.01           | 0.46          |                               |
| 1418564_s_at                 | Serbp1        | Serpine1 mRNA binding protein 1                                          | -4.53          | 0.01           | 0.54          | BRAF; MEK                     |
| 1453187_at                   | Ociad2        | OClA domain containing 2                                                 | -4.53          | 0.01           | 0.54          | ; MEK                         |
| 1436069_at                   | Ing5          | inhibitor of growth family. member 5                                     | -4.53          | 0.01           | 0.69          | BRAF; MEK                     |
| 1417406_at                   | Sertad1       | SERTA domain containing 1                                                | -4.54          | 0.01           | 0.71          |                               |
| 1417864_at                   | Pgk1          | phosphoglycerate kinase 1                                                | -4.54          | 0.01           | 0.80          | ; MEK                         |
| 1428754_at                   | Trmt6         | tRNA methyltransferase 6 homolog (S. cerevisiae)                         | -4.54          | 0.01           | 0.74          | BRAF; MEK                     |
| 1427496_at                   | Cep152        | centrosomal protein 152                                                  | -4.54          | 0.01           | 0.66          | BRAF; MEK                     |
| 1447749_at                   | Smyd5         | SET and MYND domain containing 5                                         | -4.54          | 0.01           | 0.80          | BRAF; MEK                     |
| 1449333_at                   | Sf3a1         | splicing factor 3a. subunit 1                                            | -4.54          | 0.01           | 0.64          | BRAF; MEK                     |
| 1452869_at                   | Prpf38b       | PRP38 pre-mRNA processing factor 38 (yeast) domain containing B          | -4.55          | 0.01           | 0.62          | ; MEK                         |
| 1417353_x_at                 | Snrpa1        | small nuclear ribonucleoprotein polypeptide A'                           | -4.55          | 0.01           | 0.49          | BRAF; MEK                     |
| 1421344_a_at                 | Jub           | ajuba                                                                    | -4.55          | 0.01           | 0.71          | ; n.r.                        |
| 1455434_a_at                 | Ktn1          | kinectin 1                                                               | -4.55          | 0.01           | 0.70          | n.r. ;                        |
| 1421142_s_at                 | Foxp1         | forkhead box P1                                                          | -4.55          | 0.01           | 0.58          | BRAF; MEK                     |
| 1455133_s_at                 | Al848100      | expressed sequence Al848100                                              | -4.55          | 0.01           | 0.71          | n.r. ; MEK                    |
| 1453050_at                   | Gins3         | GINS complex subunit 3 (Psf3 homolog)                                    | -4.55          | 0.01           | 0.66          | BRAF                          |
| 1438902_a_at                 | Hsp90aa1      | heat shock protein 90. alpha (cytosolic). class A member 1               | -4.55          | 0.01           | 0.82          | n.r. ; MEK                    |
| 1425166_at                   | Rbl1          | retinoblastoma-like 1 (p107)                                             | -4.55          | 0.01           | 0.43          | BRAF; MEK                     |
| 1433565_at                   | Prpf38a       | PRP38 pre-mRNA processing factor 38 (yeast) domain containing A          | -4.55          | 0.01           | 0.73          | BRAF; MEK                     |
| 1424033_at                   | Sfrs7         | splicing factor. arginine/serine-rich 7                                  | -4.55          | 0.01           | 0.47          | BRAF; MEK                     |
| 1452713_a_at                 | Wdr57         | WD repeat domain 57 (U5 snRNP specific)                                  | -4.56          | 0.01           | 0.52          | BRAF; MEK                     |
| 1454806_at                   | D12ErtD553e   | DNA segment. Chr 12. ERATO Doi 553. expressed                            | -4.56          | 0.01           | 0.50          | ; n.r.                        |
| 1434125_at                   | Utp15         | UTP15. U3 small nucleolar ribonucleoprotein. homolog (yeast)             | -4.56          | 0.01           | 0.63          | BRAF; MEK                     |

| <b>Probeset ID</b> | <b>Symbol</b> | <b>Gene Name</b>                                                                                  | <b>d-value</b> | <b>q-value</b> | <b>R-fold</b> | <b>Expression reversed by</b> |
|--------------------|---------------|---------------------------------------------------------------------------------------------------|----------------|----------------|---------------|-------------------------------|
| 1426653_at         | Mcm3          | minichromosome maintenance deficient 3 (S. cerevisiae)                                            | -4.56          | 0.01           | 0.31          | BRAF                          |
| 1438139_at         | Arhgap28      | Rho GTPase activating protein 28                                                                  | -4.56          | 0.01           | 0.63          | BRAF                          |
| 1455735_at         | Ap1s3         | adaptor-related protein complex AP-1. sigma 3                                                     | -4.56          | 0.01           | 0.36          | BRAF; MEK                     |
| 1446399_at         | Cdh10         | cadherin 10                                                                                       | -4.56          | 0.01           | 0.62          | ; n.r.                        |
| 1452179_at         | Phf17         | PHD finger protein 17                                                                             | -4.57          | 0.01           | 0.39          | ; MEK                         |
| 1448195_at         | Taf5l         | TAF5-like RNA polymerase II. p300/CBP-associated factor (PCAF)-associated factor                  | -4.57          | 0.01           | 0.65          | BRAF; MEK                     |
| 1435057_x_at       | Polr1e        | polymerase (RNA) I polypeptide E                                                                  | -4.57          | 0.01           | 0.64          | BRAF; MEK                     |
| 1418004_a_at       | Tmem176b      | transmembrane protein 176B                                                                        | -4.57          | 0.01           | 0.23          | ; MEK                         |
| 1426392_a_at       | Actr3         | ARP3 actin-related protein 3 homolog (yeast)                                                      | -4.57          | 0.01           | 0.79          |                               |
| 1434285_at         | Frm4a         | FERM domain containing 4A                                                                         | -4.57          | 0.01           | 0.52          | BRAF; MEK                     |
| 1439562_at         | F730047E07Rik | RIKEN cDNA F730047E07 gene                                                                        | -4.57          | 0.01           | 0.48          | BRAF; MEK                     |
| 1433954_at         | 4632419I22Rik | RIKEN cDNA 4632419I22 gene                                                                        | -4.57          | 0.01           | 0.59          | BRAF; MEK                     |
| 1437492_at         | Mkx           | mohawk homeobox                                                                                   | -4.57          | 0.01           | 0.53          | ; MEK                         |
| 1452737_at         | 2810008M24Rik | RIKEN cDNA 2810008M24 gene                                                                        | -4.57          | 0.01           | 0.75          | n.r. ; n.r.                   |
| 1454952_s_at       | Ncapd3        | non-SMC condensin II complex. subunit D3                                                          | -4.57          | 0.01           | 0.38          | BRAF; MEK                     |
| 1442939_at         | Rif1          | Rap1 interacting factor 1 homolog (yeast)                                                         | -4.57          | 0.01           | 0.56          | ; MEK                         |
| 1452676_a_at       | Pnpt1         | polyribonucleotide nucleotidyltransferase 1                                                       | -4.58          | 0.01           | 0.63          | ; MEK                         |
| 1424692_at         | 2810055F11Rik | RIKEN cDNA 2810055F11 gene                                                                        | -4.58          | 0.01           | 0.55          | BRAF; MEK                     |
| 1439597_at         | NA            | NA                                                                                                | -4.58          | 0.01           | 0.81          |                               |
| 1433647_s_at       | Rhobtb3       | Rho-related BTB domain containing 3                                                               | -4.58          | 0.01           | 0.58          | BRAF; MEK                     |
| 1429056_at         | Narg1l        | NMDA receptor regulated 1-like                                                                    | -4.58          | 0.01           | 0.56          | ; MEK                         |
| 1448324_at         | Rnps1         | ribonucleic acid binding protein S1                                                               | -4.58          | 0.01           | 0.62          | BRAF; MEK                     |
| 1417656_at         | Mybl2         | myeloblastosis oncogene-like 2                                                                    | -4.58          | 0.01           | 0.36          | BRAF; MEK                     |
| 1435728_at         | Tyw3          | tRNA-yW synthesizing protein 3 homolog (S. cerevisiae)                                            | -4.59          | 0.01           | 0.70          | BRAF; MEK                     |
| 1425022_at         | Usp3          | ubiquitin specific peptidase 3                                                                    | -4.59          | 0.01           | 0.73          | BRAF; MEK                     |
| 1453255_at         | Slc43a1       | solute carrier family 43. member 1                                                                | -4.59          | 0.01           | 0.58          | ; n.r.                        |
| 1454612_at         | Mex3c         | mex3 homolog C (C. elegans)                                                                       | -4.59          | 0.01           | 0.70          | ; MEK                         |
| 1416484_at         | Ttc3          | tetratricopeptide repeat domain 3                                                                 | -4.59          | 0.01           | 0.51          | ; MEK                         |
| 1456144_at         | Nav3          | neuron navigator 3                                                                                | -4.59          | 0.01           | 0.62          | BRAF; MEK                     |
| 1433530_at         | Rpl41         | ribosomal protein L41                                                                             | -4.59          | 0.01           | 0.54          |                               |
| 1435555_at         | NA            | NA                                                                                                | -4.59          | 0.01           | 0.70          | BRAF; MEK                     |
| 1428388_at         | Tnks2         | tankyrase. TRF1-interacting ankyrin-related ADP-ribose polymerase 2                               | -4.59          | 0.01           | 0.67          | BRAF; MEK                     |
| 1428390_at         | Wdr43         | WD repeat domain 43                                                                               | -4.59          | 0.01           | 0.59          | BRAF; MEK                     |
| 1460227_at         | Timp1         | tissue inhibitor of metalloproteinase 1                                                           | -4.59          | 0.01           | 0.45          | ; MEK                         |
| 1427887_at         | Rprd1b        | regulation of nuclear pre-mRNA domain containing 1B                                               | -4.60          | 0.01           | 0.78          | BRAF; MEK                     |
| 1415829_at         | Lbr           | lamin B receptor                                                                                  | -4.60          | 0.01           | 0.50          | BRAF; MEK                     |
| 1422675_at         | Smarca1       | SWI/SNF related. matrix associated. actin dependent regulator of chromatin. subfamily e. member 1 | -4.60          | 0.01           | 0.61          | BRAF; MEK                     |
| 1453849_s_at       | Hnmpab        | heterogeneous nuclear ribonucleoprotein A/B                                                       | -4.60          | 0.01           | 0.60          | BRAF; MEK                     |
| 1452784_at         | Ilgav         | integrin alpha V                                                                                  | -4.60          | 0.01           | 0.66          |                               |
| 1432202_a_at       | Wdr51a        | WD repeat domain 51A                                                                              | -4.60          | 0.01           | 0.62          | BRAF; MEK                     |
| 1436120_at         | Setdb2        | SET domain. bifurcated 2                                                                          | -4.60          | 0.01           | 0.69          |                               |
| 1434047_x_at       | Hnmpa2b1      | heterogeneous nuclear ribonucleoprotein A2/B1                                                     | -4.60          | 0.01           | 0.65          |                               |
| 1424207_at         | Smarca5       | SWI/SNF related. matrix associated. actin dependent regulator of chromatin. subfamily a. member 5 | -4.60          | 0.01           | 0.49          |                               |
| 1416748_a_at       | Mre11a        | meiotic recombination 11 homolog A (S. cerevisiae)                                                | -4.60          | 0.01           | 0.45          | BRAF; MEK                     |
| 1436738_at         | Pif1          | PIF1 5'-to-3' DNA helicase homolog (S. cerevisiae)                                                | -4.60          | 0.01           | 0.49          | BRAF; MEK                     |
| 1422653_at         | Cep70         | centrosomal protein 70                                                                            | -4.61          | 0.01           | 0.59          | ; MEK                         |
| 1416070_a_at       | Ddx18         | DEAD (Asp-Glu-Ala-Asp) box polypeptide 18                                                         | -4.61          | 0.01           | 0.71          | BRAF; MEK                     |
| 1423025_a_at       | Schip1        | schwannomin interacting protein 1                                                                 | -4.61          | 0.01           | 0.64          |                               |
| 1452371_at         | Sfrs11        | splicing factor. arginine/serine-rich 11                                                          | -4.61          | 0.01           | 0.59          | BRAF; MEK                     |
| 1444235_at         | 1700025G04Rik | RIKEN cDNA 1700025G04 gene                                                                        | -4.61          | 0.01           | 0.67          | BRAF; MEK                     |
| 1433893_s_at       | Spag5         | sperm associated antigen 5                                                                        | -4.61          | 0.01           | 0.33          | BRAF; MEK                     |
| 1456163_at         | 2700049P18Rik | RIKEN cDNA 2700049P18 gene                                                                        | -4.61          | 0.01           | 0.67          | BRAF; MEK                     |
| 1434296_at         | BC049349      | cDNA sequence BC049349                                                                            | -4.61          | 0.01           | 0.56          | BRAF; MEK                     |
| 1425362_at         | Hrbl          | HIV-1 Rev binding protein-like                                                                    | -4.61          | 0.01           | 0.76          | ; MEK                         |

| <b>Probeset ID</b> | <b>Symbol</b>     | <b>Gene Name</b>                                                                                                 | <b>d-value</b> | <b>q-value</b> | <b>R-fold</b> | <b>Expression reversed by</b> |
|--------------------|-------------------|------------------------------------------------------------------------------------------------------------------|----------------|----------------|---------------|-------------------------------|
| 1423400_at         | Kl                | klotho                                                                                                           | -4.61          | 0.01           | 0.86          | BRAF                          |
| 1450701_a_at       | Gtf2h2            | general transcription factor II H. polypeptide 2                                                                 | -4.62          | 0.01           | 0.77          | BRAF                          |
| 1435891_x_at       | NA                | NA                                                                                                               | -4.62          | 0.01           | 0.59          |                               |
| 1434020_at         | Pdap1             | PDGFA associated protein 1                                                                                       | -4.62          | 0.01           | 0.58          | BRAF; MEK                     |
| 1419101_at         | Sin3a             | transcriptional regulator. SIN3A (yeast)                                                                         | -4.62          | 0.01           | 0.64          | BRAF; MEK                     |
| 1423524_at         | Mastl             | microtubule associated serine/threonine kinase-like                                                              | -4.62          | 0.01           | 0.35          | BRAF; MEK                     |
| 1422693_a_at       | Sub1              | SUB1 homolog (S. cerevisiae)                                                                                     | -4.62          | 0.01           | 0.72          | ; MEK                         |
| 1439012_a_at       | Dck               | deoxycytidine kinase                                                                                             | -4.62          | 0.01           | 0.37          | BRAF; MEK                     |
| 1452731_x_at       | ENSMUSG0000068790 | predicted gene. ENSMUSG0000068790                                                                                | -4.62          | 0.01           | 0.44          | BRAF                          |
| 1424705_at         | Rbmx2             | RNA binding motif protein. X-linked 2                                                                            | -4.63          | 0.01           | 0.52          | BRAF; MEK                     |
| 1430983_at         | Pdia6             | protein disulfide isomerase associated 6                                                                         | -4.63          | 0.01           | 0.80          | ; MEK                         |
| 1453727_at         | Esf1              | ESF1. nucleolar pre-rRNA processing protein. homolog (S. cerevisiae)                                             | -4.63          | 0.01           | 0.45          | n.r. ;                        |
| 1416941_s_at       | Eif4h             | eukaryotic translation initiation factor 4H                                                                      | -4.63          | 0.01           | 0.85          | BRAF; MEK                     |
| 1416268_at         | Ets2              | E26 avian leukemia oncogene 2. 3' domain                                                                         | -4.63          | 0.01           | 0.52          | ; MEK                         |
| 1439027_at         | C330023M02Rik     | RIKEN cDNA C330023M02 gene                                                                                       | -4.63          | 0.01           | 0.61          | BRAF; MEK                     |
| 1449675_at         | Ccnb1             | cyclin B1                                                                                                        | -4.63          | 0.01           | 0.51          | BRAF                          |
| 1419417_at         | Vegfc             | vascular endothelial growth factor C                                                                             | -4.63          | 0.01           | 0.34          | BRAF; MEK                     |
| 1417829_a_at       | Rab15             | RAB15. member RAS oncogene family                                                                                | -4.63          | 0.01           | 0.79          | ; MEK                         |
| 1418856_a_at       | Fanca             | Fanconi anemia. complementation group A                                                                          | -4.64          | 0.01           | 0.53          | BRAF; MEK                     |
| 1434322_at         | Micall2           | MICAL-like 2                                                                                                     | -4.64          | 0.01           | 0.50          | BRAF; MEK                     |
| 1455678_at         | Sema4b            | sema domain. immunoglobulin domain (Ig). transmembrane domain (TM) and short cytoplasmic domain. (semaphorin) 4B | -4.64          | 0.01           | 0.72          | BRAF; MEK                     |
| 1436460_at         | Tmem194           | transmembrane protein 194                                                                                        | -4.64          | 0.01           | 0.56          | BRAF; MEK                     |
| 1416773_at         | Wee1              | WEE 1 homolog (S. pombe)                                                                                         | -4.64          | 0.01           | 0.53          | BRAF; MEK                     |
| 1423071_x_at       | 6720475J19Rik     | RIKEN cDNA 6720475J19 gene                                                                                       | -4.64          | 0.01           | 0.51          |                               |
| 1426236_a_at       | Glul              | glutamate-ammonia ligase (glutamine synthetase)                                                                  | -4.64          | 0.01           | 0.53          | BRAF; MEK                     |
| 1428389_s_at       | Wdr43             | WD repeat domain 43                                                                                              | -4.64          | 0.01           | 0.50          | BRAF; MEK                     |
| 1437822_at         | Yme1l1            | YME1-like 1 (S. cerevisiae)                                                                                      | -4.65          | 0.01           | 0.83          | n.r. ;                        |
| 1428255_at         | Luc7l             | Luc7 homolog (S. cerevisiae)-like                                                                                | -4.65          | 0.01           | 0.70          | BRAF; MEK                     |
| 1428448_a_at       | Gtf3c2            | general transcription factor IIIC. polypeptide 2. beta                                                           | -4.65          | 0.01           | 0.71          | BRAF; MEK                     |
| 1439753_x_at       | Six4              | sine oculis-related homeobox 4 homolog (Drosophila)                                                              | -4.65          | 0.01           | 0.47          | BRAF; MEK                     |
| 1435709_at         | Ssr4              | signal sequence receptor. delta                                                                                  | -4.65          | 0.01           | 0.76          | ; MEK                         |
| 1419693_at         | Colec12           | collectin sub-family member 12                                                                                   | -4.65          | 0.01           | 0.35          | ; MEK                         |
| 1437034_x_at       | Marcks            | myristoylated alanine rich protein kinase C substrate                                                            | -4.65          | 0.01           | 0.83          | ; MEK                         |
| 1416198_at         | Th1l              | TH1-like homolog (Drosophila)                                                                                    | -4.65          | 0.01           | 0.61          | BRAF; MEK                     |
| 1418943_at         | B230120H23Rik     | RIKEN cDNA B230120H23 gene                                                                                       | -4.65          | 0.01           | 0.39          | BRAF                          |
| 1419470_at         | Gnb4              | guanine nucleotide binding protein (G protein). beta 4                                                           | -4.65          | 0.01           | 0.38          |                               |
| 1416210_at         | Imp3              | IMP3. U3 small nucleolar ribonucleoprotein. homolog (yeast)                                                      | -4.66          | 0.01           | 0.72          | BRAF; MEK                     |
| 1433746_at         | Wdr3              | WD repeat domain 3                                                                                               | -4.66          | 0.01           | 0.59          | BRAF; MEK                     |
| 1434116_at         | Cbx2              | chromobox homolog 2 (Drosophila Pc class)                                                                        | -4.66          | 0.01           | 0.52          | BRAF; MEK                     |
| 1448235_s_at       | Hmgb1             | high mobility group box 1                                                                                        | -4.66          | 0.01           | 0.41          | ; MEK                         |
| 1452987_at         | Josd3             | Josephin domain containing 3                                                                                     | -4.66          | 0.01           | 0.55          | ; MEK                         |
| 1422966_a_at       | Tfrc              | transferrin receptor                                                                                             | -4.66          | 0.01           | 0.27          | n.r. ;                        |
| 1449080_at         | Hdac2             | histone deacetylase 2                                                                                            | -4.66          | 0.01           | 0.53          | BRAF; MEK                     |
| 1426271_at         | Smc5              | structural maintenance of chromosomes 5                                                                          | -4.66          | 0.01           | 0.55          | ; MEK                         |
| 1451208_at         | Etf1              | eukaryotic translation termination factor 1                                                                      | -4.66          | 0.01           | 0.72          | n.r. ;                        |
| 1423123_at         | Rad54l            | RAD54 like (S. cerevisiae)                                                                                       | -4.66          | 0.01           | 0.66          | BRAF; MEK                     |
| 1419620_at         | Pttg1             | pituitary tumor-transforming 1                                                                                   | -4.66          | 0.01           | 0.71          | ; MEK                         |
| 1420937_at         | Cpsf2             | cleavage and polyadenylation specific factor 2                                                                   | -4.66          | 0.01           | 0.71          | BRAF                          |
| 1433718_a_at       | Cbx1              | chromobox homolog 1 (Drosophila HP1 beta)                                                                        | -4.66          | 0.01           | 0.70          | BRAF; MEK                     |
| 1448828_at         | Smc6              | structural maintenance of chromosomes 6                                                                          | -4.66          | 0.01           | 0.58          | ; MEK                         |
| 1416962_at         | Rcc1              | regulator of chromosome condensation 1                                                                           | -4.67          | 0.01           | 0.54          | BRAF; MEK                     |
| 1437856_at         | Ipmk              | inositol polyphosphate multikinase                                                                               | -4.67          | 0.01           | 0.71          | BRAF; MEK                     |
| 1448504_a_at       | Cbx3              | chromobox homolog 3 (Drosophila HP1 gamma)                                                                       | -4.67          | 0.01           | 0.57          | BRAF; MEK                     |
| 1452049_at         | Rpl7l1            | ribosomal protein L7-like 1                                                                                      | -4.67          | 0.01           | 0.69          | BRAF; MEK                     |
| 1416184_s_at       | Hmga1             | high mobility group AT-hook 1                                                                                    | -4.67          | 0.01           | 0.15          | BRAF; MEK                     |

| <b>Probeset ID</b> | <b>Symbol</b> | <b>Gene Name</b>                                                                                                                    | <b>d-value</b> | <b>q-value</b> | <b>R-fold</b> | <b>Expression reversed by</b> |
|--------------------|---------------|-------------------------------------------------------------------------------------------------------------------------------------|----------------|----------------|---------------|-------------------------------|
| 1421354_at         | Prkg2         | protein kinase. cGMP-dependent. type II                                                                                             | -4.67          | 0.01           | 0.68          | BRAF; MEK                     |
| 1417131_at         | Cdc25a        | cell division cycle 25 homolog A (S. pombe)                                                                                         | -4.68          | 0.01           | 0.59          | BRAF; MEK                     |
| 1430165_at         | Stk17b        | serine/threonine kinase 17b (apoptosis-inducing)                                                                                    | -4.68          | 0.01           | 0.78          | ; MEK                         |
| 1454609_x_at       | 6430527G18Rik | RIKEN cDNA 6430527G18 gene                                                                                                          | -4.68          | 0.01           | 0.54          | BRAF; MEK                     |
| 1436747_at         | 1110014K08Rik | RIKEN cDNA 1110014K08 gene                                                                                                          | -4.68          | 0.01           | 0.60          | BRAF; MEK                     |
| 1436030_at         | Cachd1        | cache domain containing 1                                                                                                           | -4.68          | 0.01           | 0.73          | BRAF; MEK                     |
| 1458667_at         | 4930519N13Rik | RIKEN cDNA 4930519N13 gene                                                                                                          | -4.68          | 0.01           | 0.49          | BRAF; MEK                     |
| 1429183_at         | Pkp2          | plakophilin 2                                                                                                                       | -4.68          | 0.01           | 0.46          | n.r. ; n.r.                   |
| 1440254_at         | 100041277     | predicted gene. 100041277                                                                                                           | -4.68          | 0.01           | 0.68          | ; MEK                         |
| 1418442_at         | Xpo1          | exportin 1. CRM1 homolog (yeast)                                                                                                    | -4.68          | 0.01           | 0.53          | BRAF; MEK                     |
| 1434602_at         | Med13l        | mediator complex subunit 13-like                                                                                                    | -4.68          | 0.01           | 0.63          | BRAF; MEK                     |
| 1420753_at         | Tll1          | tolloid-like                                                                                                                        | -4.69          | 0.01           | 0.44          | n.r. ; n.r.                   |
| 1438339_at         | Fancd2        | Fanconi anemia. complementation group D2                                                                                            | -4.69          | 0.01           | 0.51          | BRAF; MEK                     |
| 1449291_a_at       | Dcblid1       | discoidin. CUB and LCCL domain containing 1                                                                                         | -4.69          | 0.01           | 0.63          | BRAF                          |
| 1433872_at         | 2410042D21Rik | RIKEN cDNA 2410042D21 gene                                                                                                          | -4.69          | 0.01           | 0.73          | ; MEK                         |
| 1438833_at         | Casc5         | cancer susceptibility candidate 5                                                                                                   | -4.69          | 0.01           | 0.55          | BRAF; MEK                     |
| 1438630_x_at       | Mat2a         | methionine adenosyltransferase II. alpha                                                                                            | -4.69          | 0.01           | 0.70          | BRAF; MEK                     |
| 1438429_at         | 2610319H10Rik | RIKEN cDNA 2610319H10 gene                                                                                                          | -4.69          | 0.01           | 0.41          | ; MEK                         |
| 1433937_at         | Trp53bp2      | transformation related protein 53 binding protein 2                                                                                 | -4.70          | 0.01           | 0.74          | BRAF; MEK                     |
| 1416126_at         | Rpo1-2        | RNA polymerase 1-2                                                                                                                  | -4.70          | 0.01           | 0.61          | BRAF; MEK                     |
| 1416144_a_at       | Dhx15         | DEAH (Asp-Glu-Ala-His) box polypeptide 15                                                                                           | -4.70          | 0.01           | 0.63          | BRAF; MEK                     |
| 1415916_a_at       | Mthfd1        | methylenetetrahydrofolate dehydrogenase (NADP+ dependent). methenyltetrahydrofolate cyclohydrolase. formyltetrahydrofolate synthase | -4.70          | 0.01           | 0.58          | BRAF; MEK                     |
| 1437073_x_at       | NA            | NA                                                                                                                                  | -4.70          | 0.01           | 0.63          | BRAF; MEK                     |
| 1453038_at         | 4930422G04Rik | RIKEN cDNA 4930422G04 gene                                                                                                          | -4.70          | 0.01           | 0.61          | BRAF; MEK                     |
| 1449328_at         | Ly75          | lymphocyte antigen 75                                                                                                               | -4.70          | 0.01           | 0.48          | BRAF; MEK                     |
| 1425753_a_at       | Ung           | uracil DNA glycosylase                                                                                                              | -4.70          | 0.01           | 0.45          | BRAF; MEK                     |
| 1423306_at         | 2010002N04Rik | RIKEN cDNA 2010002N04 gene                                                                                                          | -4.71          | 0.01           | 0.55          | BRAF; MEK                     |
| 1451346_at         | Mtap          | methylthioadenosine phosphorylase                                                                                                   | -4.71          | 0.01           | 0.66          | ; MEK                         |
| 1417522_at         | Fbxo32        | F-box protein 32                                                                                                                    | -4.71          | 0.01           | 0.49          |                               |
| 1456730_x_at       | Actl6a        | actin-like 6A                                                                                                                       | -4.71          | 0.01           | 0.65          | BRAF; MEK                     |
| 1433762_at         | C630043F03Rik | RIKEN cDNA C630043F03 gene                                                                                                          | -4.72          | 0.01           | 0.75          | BRAF; MEK                     |
| 1415851_a_at       | Impdh2        | inosine 5'-phosphate dehydrogenase 2                                                                                                | -4.72          | 0.01           | 0.57          | BRAF; MEK                     |
| 1425007_at         | Zfp566        | zinc finger protein 566                                                                                                             | -4.72          | 0.01           | 0.69          | BRAF; MEK                     |
| 1455029_at         | Kif21a        | kinesin family member 21A                                                                                                           | -4.72          | 0.01           | 0.63          | BRAF; MEK                     |
| 1451521_x_at       | Eif4h         | eukaryotic translation initiation factor 4H                                                                                         | -4.72          | 0.01           | 0.81          | BRAF; MEK                     |
| 1429364_at         | 4930579G24Rik | RIKEN cDNA 4930579G24 gene                                                                                                          | -4.72          | 0.01           | 0.62          | BRAF; MEK                     |
| 1438168_x_at       | Ddx39         | DEAD (Asp-Glu-Ala-Asp) box polypeptide 39                                                                                           | -4.73          | 0.01           | 0.67          | BRAF; MEK                     |
| 1428615_at         | P2ry5         | purinergic receptor P2Y. G-protein coupled. 5                                                                                       | -4.73          | 0.01           | 0.59          |                               |
| 1437179_at         | Rif1          | Rap1 interacting factor 1 homolog (yeast)                                                                                           | -4.73          | 0.01           | 0.37          | BRAF; MEK                     |
| 1448231_at         | Fkbp5         | FK506 binding protein 5                                                                                                             | -4.73          | 0.01           | 0.45          |                               |
| 1424571_at         | Ddx46         | DEAD (Asp-Glu-Ala-Asp) box polypeptide 46                                                                                           | -4.73          | 0.01           | 0.74          | ; n.r.                        |
| 1430028_at         | 2210018M11Rik | RIKEN cDNA 2210018M11 gene                                                                                                          | -4.73          | 0.01           | 0.71          |                               |
| 1416569_at         | Actl6a        | actin-like 6A                                                                                                                       | -4.74          | 0.01           | 0.63          | BRAF; MEK                     |
| 1417404_at         | Elovl6        | ELOVL family member 6. elongation of long chain fatty acids (yeast)                                                                 | -4.74          | 0.01           | 0.56          | ; MEK                         |
| 1452197_at         | Smc4          | structural maintenance of chromosomes 4                                                                                             | -4.74          | 0.01           | 0.40          | BRAF; MEK                     |
| 1426297_at         | Tcfe2a        | transcription factor E2a                                                                                                            | -4.74          | 0.01           | 0.61          | BRAF; MEK                     |
| 1431181_a_at       | Luc7l         | Luc7 homolog (S. cerevisiae)-like                                                                                                   | -4.74          | 0.01           | 0.66          | BRAF                          |
| 1419156_at         | Sox4          | SRY-box containing gene 4                                                                                                           | -4.74          | 0.01           | 0.54          | BRAF; MEK                     |
| 1426381_at         | Pprc1         | peroxisome proliferative activated receptor. gamma. coactivator-related 1                                                           | -4.74          | 0.01           | 0.60          | BRAF; MEK                     |
| 1417488_at         | Fosl1         | fos-like antigen 1                                                                                                                  | -4.74          | 0.01           | 0.32          | BRAF; MEK                     |
| 1430542_a_at       | Slc25a5       | solute carrier family 25 (mitochondrial carrier. adenine nucleotide translocator). member 5                                         | -4.74          | 0.01           | 0.69          | BRAF; MEK                     |
| 1455740_at         | Hnmpa1        | heterogeneous nuclear ribonucleoprotein A1                                                                                          | -4.74          | 0.01           | 0.34          | ; MEK                         |
| 1448953_at         | Blim          | Bloom syndrome homolog (human)                                                                                                      | -4.75          | 0.01           | 0.44          | BRAF; MEK                     |



| Probeset ID  | Symbol        | Gene Name                                                                         | d-value | q-value | R-fold | Expression reversed by |
|--------------|---------------|-----------------------------------------------------------------------------------|---------|---------|--------|------------------------|
| 1454968_at   | 1110034A24Rik | RIKEN cDNA 1110034A24 gene                                                        | -4.75   | 0.01    | 0.58   | BRAF; MEK              |
| 1436186_at   | E2f8          | E2F transcription factor 8                                                        | -4.75   | 0.01    | 0.46   | BRAF; MEK              |
| 1438287_x_at | Ddx39         | DEAD (Asp-Glu-Ala-Asp) box polypeptide 39                                         | -4.75   | 0.01    | 0.76   | BRAF                   |
| 1451740_at   | Paip1         | polyadenylate binding protein-interacting protein 1                               | -4.75   | 0.01    | 0.57   | BRAF; MEK              |
| 1427746_x_at | H2-K1         | histocompatibility 2. K1. K region                                                | -4.75   | 0.01    | 0.36   | ; MEK                  |
| 1433535_x_at | Cct2          | chaperonin containing Tcp1. subunit 2 (beta)                                      | -4.75   | 0.01    | 0.77   | BRAF; MEK              |
| 1459765_s_at | Sf1           | splicing factor 1                                                                 | -4.76   | 0.01    | 0.61   | BRAF; MEK              |
| 1454795_at   | Cobl1         | Cobl-like 1                                                                       | -4.76   | 0.01    | 0.40   | BRAF; MEK              |
| 1416161_at   | Rad21         | RAD21 homolog (S. pombe)                                                          | -4.76   | 0.01    | 0.53   | BRAF; MEK              |
| 1419568_at   | Mapk1         | mitogen-activated protein kinase 1                                                | -4.76   | 0.01    | 0.74   | BRAF; n.r.             |
| 1421033_a_at | Tcerg1        | transcription elongation regulator 1 (CA150)                                      | -4.76   | 0.01    | 0.58   | BRAF; MEK              |
| 1449470_at   | Dlx1          | distal-less homeobox 1                                                            | -4.76   | 0.01    | 0.50   | BRAF; MEK              |
| 1436026_at   | Zfp703        | zinc finger protein 703                                                           | -4.77   | 0.01    | 0.77   | BRAF; MEK              |
| 1423431_a_at | Mybbp1a       | MYB binding protein (P160) 1a                                                     | -4.77   | 0.01    | 0.67   | BRAF; MEK              |
| 1418476_at   | Crif1         | cytokine receptor-like factor 1                                                   | -4.77   | 0.01    | 0.44   | BRAF; MEK              |
| 1426343_at   | Stt3b         | STT3. subunit of the oligosaccharyltransferase complex. homolog B (S. cerevisiae) | -4.77   | 0.01    | 0.75   |                        |
| 1418023_at   | Narg1         | NMDA receptor-regulated gene 1                                                    | -4.77   | 0.01    | 0.66   | ; MEK                  |
| 1421934_at   | Cbx5          | chromobox homolog 5 (Drosophila HP1a)                                             | -4.77   | 0.01    | 0.63   | BRAF; MEK              |
| 1451428_x_at | Egfl7         | EGF-like domain 7                                                                 | -4.77   | 0.01    | 0.70   | ; MEK                  |
| 1434981_at   | E130303B06Rik | RIKEN cDNA E130303B06 gene                                                        | -4.77   | 0.01    | 0.65   | BRAF; MEK              |
| 1454928_at   | Safb          | scaffold attachment factor B                                                      | -4.77   | 0.01    | 0.65   | BRAF; MEK              |
| 1424161_at   | Ddx27         | DEAD (Asp-Glu-Ala-Asp) box polypeptide 27                                         | -4.78   | 0.01    | 0.59   | BRAF; MEK              |
| 1435575_at   | Kntc1         | kinetochore associated 1                                                          | -4.78   | 0.01    | 0.32   | BRAF; MEK              |
| 1423674_at   | Usp1          | ubiquitin specific peptidase 1                                                    | -4.78   | 0.01    | 0.45   | BRAF; MEK              |
| 1424891_a_at | Zw10          | ZW10 homolog (Drosophila). centromere/kinetochore protein                         | -4.78   | 0.01    | 0.66   | BRAF; MEK              |
| 1428919_at   | Fgfr1op       | Fgfr1 oncogene partner                                                            | -4.78   | 0.01    | 0.63   | ; MEK                  |
| 1428728_at   | Ddx51         | DEAD (Asp-Glu-Ala-Asp) box polypeptide 51                                         | -4.78   | 0.01    | 0.74   | BRAF; MEK              |
| 1434699_at   | 6030408C04Rik | RIKEN cDNA 6030408C04 gene                                                        | -4.78   | 0.01    | 0.36   | BRAF; MEK              |
| 1448132_at   | Slc19a1       | solute carrier family 19 (sodium/hydrogen exchanger). member 1                    | -4.78   | 0.01    | 0.64   | BRAF                   |
| 1427506_at   | Ppil5         | peptidylprolyl isomerase (cyclophilin) like 5                                     | -4.79   | 0.00    | 0.66   | BRAF; MEK              |
| 1418127_a_at | Aifm1         | apoptosis-inducing factor. mitochondrion-associated 1                             | -4.79   | 0.00    | 0.53   | BRAF; MEK              |
| 1426463_at   | Gphn          | gephyrin                                                                          | -4.79   | 0.00    | 0.59   | BRAF; MEK              |
| 1454657_s_at | Mak10         | MAK10 homolog. amino-acid N-acetyltransferase subunit. (S. cerevisiae)            | -4.80   | 0.00    | 0.79   | BRAF; MEK              |
| 1426839_at   | Pold3         | polymerase (DNA-directed). delta 3. accessory subunit                             | -4.80   | 0.00    | 0.55   | BRAF                   |
| 1426576_at   | Sgms1         | sphingomyelin synthase 1                                                          | -4.80   | 0.00    | 0.66   | n.r. ; n.r.            |
| 1452061_s_at | Strbp         | spermatid perinuclear RNA binding protein                                         | -4.81   | 0.00    | 0.54   | ; MEK                  |
| 1459874_s_at | Mtmr4         | myotubularin related protein 4                                                    | -4.81   | 0.00    | 0.61   | BRAF; MEK              |
| 1450668_s_at | Hspe1         | heat shock protein 1 (chaperonin 10)                                              | -4.81   | 0.00    | 0.78   | BRAF; MEK              |
| 1437979_at   | Zcchc2        | zinc finger. CCHC domain containing 2                                             | -4.81   | 0.00    | 0.69   |                        |
| 1435448_at   | Bcl2l11       | BCL2-like 11 (apoptosis facilitator)                                              | -4.81   | 0.00    | 0.58   | BRAF; MEK              |
| 1426580_at   | Plk4          | polo-like kinase 4 (Drosophila)                                                   | -4.81   | 0.00    | 0.36   | BRAF; MEK              |
| 1428264_at   | Wdr57         | WD repeat domain 57 (U5 snRNP specific)                                           | -4.81   | 0.00    | 0.63   | BRAF; MEK              |
| 1456055_x_at | Pold1         | polymerase (DNA directed). delta 1. catalytic subunit                             | -4.81   | 0.00    | 0.41   | BRAF; MEK              |
| 1458165_at   | Ipo7          | importin 7                                                                        | -4.81   | 0.00    | 0.66   | BRAF                   |
| 1421894_a_at | Tpp2          | tripeptidyl peptidase II                                                          | -4.82   | 0.00    | 0.76   |                        |
| 1439091_at   | Fancc2        | Fanconi anemia. complementation group D2                                          | -4.82   | 0.00    | 0.36   | BRAF; MEK              |
| 1423440_at   | 1110001A07Rik | RIKEN cDNA 1110001A07 gene                                                        | -4.82   | 0.00    | 0.58   | BRAF; MEK              |
| 1454978_at   | Ttyh3         | tweety homolog 3 (Drosophila)                                                     | -4.82   | 0.00    | 0.59   | BRAF; MEK              |
| 1415781_a_at | Sumo2         | SMT3 suppressor of mif two 3 homolog 2 (yeast)                                    | -4.82   | 0.00    | 0.82   | BRAF; MEK              |
| 1434850_at   | Iqgap3        | IQ motif containing GTPase activating protein 3                                   | -4.82   | 0.00    | 0.43   | BRAF; MEK              |
| 1429104_at   | Limd2         | LIM domain containing 2                                                           | -4.82   | 0.00    | 0.49   | BRAF; MEK              |
| 1428310_at   | Larp7         | La ribonucleoprotein domain family. member 7                                      | -4.82   | 0.00    | 0.54   | BRAF; MEK              |
| 1427886_at   | Pom121        | nuclear pore membrane protein 121                                                 | -4.83   | 0.00    | 0.64   | BRAF; MEK              |
| 1449227_at   | Ch25h         | cholesterol 25-hydroxylase                                                        | -4.83   | 0.00    | 0.74   | ; MEK                  |
| 1440226_at   | Zfp760        | zinc finger protein 760                                                           | -4.83   | 0.00    | 0.33   | ; MEK                  |



| <b>Probeset ID</b> | <b>Symbol</b> | <b>Gene Name</b>                                                                   | <b>d-value</b> | <b>q-value</b> | <b>R-fold</b> | <b>Expression reversed by</b> |
|--------------------|---------------|------------------------------------------------------------------------------------|----------------|----------------|---------------|-------------------------------|
| 1416024_x_at       | Cct3          | chaperonin containing Tcp1. subunit 3 (gamma)                                      | -4.83          | 0.00           | 0.78          | BRAF; MEK                     |
| 1436036_at         | Whsc2         | Wolf-Hirschhorn syndrome candidate 2 (human)                                       | -4.83          | 0.00           | 0.52          | BRAF; MEK                     |
| 1428532_at         | Ints7         | integrator complex subunit 7                                                       | -4.83          | 0.00           | 0.54          | BRAF; MEK                     |
| 1453107_s_at       | Pebp1         | phosphatidylethanolamine binding protein 1                                         | -4.83          | 0.00           | 0.31          | BRAF; MEK                     |
| 1433789_at         | Snhg3         | small nucleolar RNA host gene (non-protein coding) 3                               | -4.84          | 0.00           | 0.43          | BRAF; MEK                     |
| 1451111_at         | Nup133        | nucleoporin 133                                                                    | -4.84          | 0.00           | 0.55          | BRAF; MEK                     |
| 1427276_at         | Smc4          | structural maintenance of chromosomes 4                                            | -4.84          | 0.00           | 0.42          | BRAF; MEK                     |
| 1456067_at         | Gli3          | GLI-Kruppel family member GLI3                                                     | -4.84          | 0.00           | 0.62          | BRAF; MEK                     |
| 1421498_a_at       | 2010204K13Rik | RIKEN cDNA 2010204K13 gene                                                         | -4.84          | 0.00           | 0.56          | BRAF; MEK                     |
| 1437285_at         | 1110020G09Rik | RIKEN cDNA 1110020G09 gene                                                         | -4.84          | 0.00           | 0.76          | BRAF; MEK                     |
| 1422824_s_at       | Eps8          | epidermal growth factor receptor pathway substrate 8                               | -4.84          | 0.00           | 0.37          | BRAF; MEK                     |
| 1448187_at         | Pold1         | polymerase (DNA directed). delta 1. catalytic subunit                              | -4.84          | 0.00           | 0.45          | BRAF; MEK                     |
| 1443688_at         | BC050092      | cDNA sequence BC050092                                                             | -4.84          | 0.00           | 0.71          | BRAF; MEK                     |
| 1427876_at         | Zc3h15        | zinc finger CCCH-type containing 15                                                | -4.85          | 0.00           | 0.71          | ; MEK                         |
| 1454679_at         | Zfp828        | zinc finger protein 828                                                            | -4.85          | 0.00           | 0.76          | BRAF; MEK                     |
| 1416593_at         | Glrx          | glutaredoxin                                                                       | -4.85          | 0.00           | 0.45          |                               |
| 1427439_s_at       | Prmt5         | protein arginine N-methyltransferase 5                                             | -4.85          | 0.00           | 0.70          |                               |
| 1433552_a_at       | Polr2b        | polymerase (RNA) II (DNA directed) polypeptide B                                   | -4.85          | 0.00           | 0.68          | BRAF; MEK                     |
| 1448149_at         | Ctnna1        | catenin (cadherin associated protein). alpha 1                                     | -4.85          | 0.00           | 0.74          | BRAF; MEK                     |
| 1422848_a_at       | Pabpn1        | poly? binding protein. nuclear 1                                                   | -4.85          | 0.00           | 0.66          | BRAF; MEK                     |
| 1451530_at         | Egfr          | epidermal growth factor receptor                                                   | -4.85          | 0.00           | 0.42          | n.r. ; n.r.                   |
| 1433669_at         | Akap8         | A kinase (PRKA) anchor protein 8                                                   | -4.85          | 0.00           | 0.65          | BRAF; MEK                     |
| 1451994_s_at       | 3930401K13Rik | RIKEN cDNA 3930401K13 gene                                                         | -4.85          | 0.00           | 0.77          | BRAF                          |
| 1440739_at         | Vegfc         | vascular endothelial growth factor C                                               | -4.85          | 0.00           | 0.29          | BRAF; MEK                     |
| 1452344_at         | Synj2         | synaptojanin 2                                                                     | -4.85          | 0.00           | 0.39          | BRAF; MEK                     |
| 1456028_x_at       | Marcks        | myristoylated alanine rich protein kinase C substrate                              | -4.86          | 0.00           | 0.68          | BRAF; MEK                     |
| 1447930_at         | Baz1a         | bromodomain adjacent to zinc finger domain 1A                                      | -4.86          | 0.00           | 0.65          | BRAF                          |
| 1417940_s_at       | Rad51ap1      | RAD51 associated protein 1                                                         | -4.86          | 0.00           | 0.56          | BRAF                          |
| 1451782_a_at       | Slc29a1       | solute carrier family 29 (nucleoside transporters). member 1                       | -4.86          | 0.00           | 0.45          | BRAF; MEK                     |
| 1447880_x_at       | S1pr2         | sphingosine-1-phosphate receptor 2                                                 | -4.86          | 0.00           | 0.70          | BRAF; MEK                     |
| 1448144_at         | Hnmpab        | heterogeneous nuclear ribonucleoprotein A/B                                        | -4.86          | 0.00           | 0.68          | BRAF                          |
| 1429057_at         | Narg1l        | NMDA receptor regulated 1-like                                                     | -4.86          | 0.00           | 0.51          | BRAF; MEK                     |
| 1424193_at         | Pwp2          | PWP2 periodic tryptophan protein homolog (yeast)                                   | -4.87          | 0.00           | 0.74          | BRAF; MEK                     |
| 1423181_s_at       | Clns1a        | chloride channel. nucleotide-sensitive. 1A                                         | -4.87          | 0.00           | 0.78          | BRAF                          |
| 1460403_at         | Psip1         | PC4 and SFRS1 interacting protein 1                                                | -4.87          | 0.00           | 0.49          | BRAF; MEK                     |
| 1429503_at         | 2900024C23Rik | RIKEN cDNA 2900024C23 gene                                                         | -4.87          | 0.00           | 0.46          | BRAF; MEK                     |
| 1453053_at         | 2610036L11Rik | RIKEN cDNA 2610036L11 gene                                                         | -4.87          | 0.00           | 0.63          | BRAF; MEK                     |
| 1453283_at         | Pgm1          | phosphoglucomutase 1                                                               | -4.88          | 0.00           | 0.77          | ; MEK                         |
| 1460429_at         | Cdc5l         | cell division cycle 5-like (S. pombe)                                              | -4.88          | 0.00           | 0.62          | BRAF; MEK                     |
| 1454074_a_at       | Rsrc2         | arginine/serine-rich coiled-coil 2                                                 | -4.88          | 0.00           | 0.66          | ; MEK                         |
| 1425498_at         | Prpf4b        | PRP4 pre-mRNA processing factor 4 homolog B (yeast)                                | -4.88          | 0.00           | 0.68          |                               |
| 1418640_at         | Sirt1         | sirtuin 1 (silent mating type information regulation 2. homolog) 1 (S. cerevisiae) | -4.88          | 0.00           | 0.64          | BRAF; MEK                     |
| 1416208_at         | Usp14         | ubiquitin specific peptidase 14                                                    | -4.88          | 0.00           | 0.69          |                               |
| 1417352_s_at       | Snrpa1        | small nuclear ribonucleoprotein polypeptide A'                                     | -4.88          | 0.00           | 0.53          | BRAF; MEK                     |
| 1455897_x_at       | Hmgn1         | high mobility group nucleosomal binding domain 1                                   | -4.88          | 0.00           | 0.72          | BRAF; MEK                     |
| 1443807_x_at       | Ccnf          | cyclin F                                                                           | -4.88          | 0.00           | 0.37          | BRAF; MEK                     |
| 1427062_at         | Rbbp8         | retinoblastoma binding protein 8                                                   | -4.89          | 0.00           | 0.61          | n.r. ;                        |
| 1417132_at         | Cdc25a        | cell division cycle 25 homolog A (S. pombe)                                        | -4.89          | 0.00           | 0.56          | BRAF; MEK                     |
| 1431037_a_at       | Elavl1        | ELAV (embryonic lethal. abnormal vision. Drosophila)-like 1 (Hu antigen R)         | -4.89          | 0.00           | 0.66          | BRAF; MEK                     |
| 1449893_a_at       | Lrig1         | leucine-rich repeats and immunoglobulin-like domains 1                             | -4.89          | 0.00           | 0.41          | BRAF; MEK                     |
| 1437593_x_at       | Api5          | apoptosis inhibitor 5                                                              | -4.89          | 0.00           | 0.78          | BRAF; MEK                     |
| 1434842_s_at       | Upf3b         | UPF3 regulator of nonsense transcripts homolog B (yeast)                           | -4.89          | 0.00           | 0.69          | BRAF; MEK                     |
| 1434434_s_at       | Tcerg1        | transcription elongation regulator 1 (CA150)                                       | -4.89          | 0.00           | 0.60          | BRAF; MEK                     |
| 1429588_at         | 2810474O19Rik | RIKEN cDNA 2810474O19 gene                                                         | -4.89          | 0.00           | 0.60          | ; MEK                         |
| 1456862_at         | Six4          | sine oculis-related homeobox 4 homolog (Drosophila)                                | -4.90          | 0.00           | 0.44          | BRAF; MEK                     |

| <b>Probeset ID</b> | <b>Symbol</b> | <b>Gene Name</b>                                                             | <b>d-value</b> | <b>q-value</b> | <b>R-fold</b> | <b>Expression reversed by</b> |
|--------------------|---------------|------------------------------------------------------------------------------|----------------|----------------|---------------|-------------------------------|
| 1436872_at         | Tacc3         | transforming. acidic coiled-coil containing protein 3                        | -4.90          | 0.00           | 0.59          | BRAF; MEK                     |
| 1415965_at         | Scd1          | stearoyl-Coenzyme A desaturase 1                                             | -4.90          | 0.00           | 0.46          | ; MEK                         |
| 1430805_s_at       | Rmi1          | RMI1. RecQ mediated genome instability 1. homolog (S. cerevisiae)            | -4.90          | 0.00           | 0.60          |                               |
| 1425986_a_at       | Dcun1d1       | DCN1. defective in cullin neddylation 1. domain containing 1 (S. cerevisiae) | -4.90          | 0.00           | 0.65          | ; MEK                         |
| 1440635_at         | Palld         | palladin. cytoskeletal associated protein                                    | -4.90          | 0.00           | 0.52          | ; MEK                         |
| 1436454_x_at       | Fen1          | flap structure specific endonuclease 1                                       | -4.90          | 0.00           | 0.62          | BRAF; MEK                     |
| 1427141_at         | 2700099C18Rik | RIKEN cDNA 2700099C18 gene                                                   | -4.90          | 0.00           | 0.44          | BRAF; MEK                     |
| 1417263_at         | Ptgs2         | prostaglandin-endoperoxide synthase 2                                        | -4.91          | 0.00           | 0.17          | n.r. ; n.r.                   |
| 1451103_at         | D14Ert500e    | DNA segment. Chr 14. ERATO Doi 500. expressed                                | -4.91          | 0.00           | 0.46          | BRAF; MEK                     |
| 1438462_x_at       | Khdrbs1       | KH domain containing. RNA binding. signal transduction associated 1          | -4.91          | 0.00           | 0.72          | BRAF; MEK                     |
| 1439510_at         | Sgol1         | shugoshin-like 1 (S. pombe)                                                  | -4.91          | 0.00           | 0.29          | BRAF; MEK                     |
| 1433794_at         | Setx          | senataxin                                                                    | -4.91          | 0.00           | 0.65          | ; MEK                         |
| 1451092_a_at       | Rangap1       | RAN GTPase activating protein 1                                              | -4.91          | 0.00           | 0.61          | BRAF; MEK                     |
| 1450920_at         | Ccnb2         | cyclin B2                                                                    | -4.92          | 0.00           | 0.34          | BRAF; MEK                     |
| 1429080_at         | Mphosph10     | M-phase phosphoprotein 10 (U3 small nucleolar ribonucleoprotein)             | -4.92          | 0.00           | 0.65          | n.r. ;                        |
| 1423699_at         | NcapH2        | non-SMC condensin II complex. subunit H2                                     | -4.92          | 0.00           | 0.77          | BRAF; MEK                     |
| 1451901_at         | Hlhf          | helicase-like transcription factor                                           | -4.92          | 0.00           | 0.81          |                               |
| 1438988_x_at       | Hn1           | hematological and neurological expressed sequence 1                          | -4.92          | 0.00           | 0.69          | BRAF; MEK                     |
| 1456321_at         | Npal1         | NIPA-like domain containing 1                                                | -4.92          | 0.00           | 0.58          | ; MEK                         |
| 1432016_a_at       | ldh3a         | isocitrate dehydrogenase 3 (NAD+) alpha                                      | -4.92          | 0.00           | 0.70          | ; n.r.                        |
| 1429156_at         | 2610036L11Rik | RIKEN cDNA 2610036L11 gene                                                   | -4.92          | 0.00           | 0.48          | BRAF; MEK                     |
| 1424880_at         | Trib1         | tribbles homolog 1 (Drosophila)                                              | -4.92          | 0.00           | 0.56          | BRAF; MEK                     |
| 1455814_x_at       | Ddx39         | DEAD (Asp-Glu-Ala-Asp) box polypeptide 39                                    | -4.93          | 0.00           | 0.66          | BRAF; MEK                     |
| 1448165_at         | Casp2         | caspase 2                                                                    | -4.93          | 0.00           | 0.58          | BRAF; MEK                     |
| 1415810_at         | Uhrf1         | ubiquitin-like. containing PHD and RING finger domains. 1                    | -4.94          | 0.00           | 0.21          | BRAF; MEK                     |
| 1423787_at         | Nup133        | nucleoporin 133                                                              | -4.94          | 0.00           | 0.57          | BRAF; MEK                     |
| 1449522_at         | Unc5c         | unc-5 homolog C (C. elegans)                                                 | -4.94          | 0.00           | 0.38          | BRAF; MEK                     |
| 1424569_at         | Ddx46         | DEAD (Asp-Glu-Ala-Asp) box polypeptide 46                                    | -4.94          | 0.00           | 0.57          | BRAF                          |
| 1439556_at         | Ncam1         | neural cell adhesion molecule 1                                              | -4.94          | 0.00           | 0.29          | ; MEK                         |
| 1420936_s_at       | Cpsf2         | cleavage and polyadenylation specific factor 2                               | -4.94          | 0.00           | 0.67          | BRAF; MEK                     |
| 1436118_at         | Vangl2        | vang-like 2 (van gogh. Drosophila)                                           | -4.94          | 0.00           | 0.52          | BRAF; MEK                     |
| 1428634_at         | Twistnb       | TWIST neighbor                                                               | -4.94          | 0.00           | 0.78          | BRAF; MEK                     |
| 1454648_s_at       | D10Wsu102e    | DNA segment. Chr 10. Wayne State University 102. expressed                   | -4.94          | 0.00           | 0.61          | BRAF                          |
| 1455220_at         | Frat2         | frequently rearranged in advanced T-cell lymphomas 2                         | -4.94          | 0.00           | 0.62          | BRAF; MEK                     |
| 1447623_s_at       | Prkd1         | protein kinase D1                                                            | -4.94          | 0.00           | 0.49          | BRAF; MEK                     |
| 1417503_at         | Rfc2          | replication factor C (activator 1) 2                                         | -4.94          | 0.00           | 0.69          | BRAF; MEK                     |
| 1434173_s_at       | D19Bwg1357e   | DNA segment. Chr 19. Brigham & Women's Genetics 1357 expressed               | -4.95          | 0.00           | 0.63          | BRAF; MEK                     |
| 1434859_at         | Umps          | uridine monophosphate synthetase                                             | -4.95          | 0.00           | 0.57          | BRAF; MEK                     |
| 1422503_s_at       | Parp1         | poly (ADP-ribose) polymerase family. member 1                                | -4.95          | 0.00           | 0.63          | BRAF; MEK                     |
| 1443794_x_at       | Noc4l         | nucleolar complex associated 4 homolog (S. cerevisiae)                       | -4.95          | 0.00           | 0.58          | BRAF; MEK                     |
| 1452099_at         | AA408296      | expressed sequence AA408296                                                  | -4.95          | 0.00           | 0.67          | BRAF; MEK                     |
| 1449730_s_at       | Fzd3          | frizzled homolog 3 (Drosophila)                                              | -4.95          | 0.00           | 0.72          |                               |
| 1428674_at         | Prpf38b       | PRP38 pre-mRNA processing factor 38 (yeast) domain containing B              | -4.95          | 0.00           | 0.63          | ; MEK                         |
| 1422628_at         | 4632417K18Rik | RIKEN cDNA 4632417K18 gene                                                   | -4.96          | 0.00           | 0.23          | BRAF; MEK                     |
| 1433813_at         | NA            | NA                                                                           | -4.96          | 0.00           | 0.61          | BRAF; MEK                     |
| 1450874_at         | Matr3         | matrin 3                                                                     | -4.96          | 0.00           | 0.75          | n.r. ;                        |
| 1439041_at         | Slc39a10      | solute carrier family 39 (zinc transporter). member 10                       | -4.96          | 0.00           | 0.42          |                               |
| 1426270_at         | Smc5          | structural maintenance of chromosomes 5                                      | -4.96          | 0.00           | 0.56          | ; MEK                         |
| 1451044_at         | Sip1          | survival of motor neuron protein interacting protein 1                       | -4.97          | 0.00           | 0.50          | BRAF; MEK                     |
| 1429446_at         | Sdccag1       | serologically defined colon cancer antigen 1                                 | -4.97          | 0.00           | 0.65          | ; MEK                         |
| 1416940_at         | Ppif          | peptidylprolyl isomerase F (cyclophilin F)                                   | -4.98          | 0.00           | 0.58          | BRAF; MEK                     |
| 1428207_at         | Bcl7a         | B-cell CLL/lymphoma 7A                                                       | -4.98          | 0.00           | 0.61          | BRAF; MEK                     |
| 1456212_x_at       | Socs3         | suppressor of cytokine signaling 3                                           | -4.98          | 0.00           | 0.38          | BRAF; MEK                     |
| 1435449_at         | Bcl2l11       | BCL2-like 11 (apoptosis facilitator)                                         | -4.98          | 0.00           | 0.52          | BRAF; MEK                     |
| 1456652_at         | Dtl           | denticleless homolog (Drosophila)                                            | -4.98          | 0.00           | 0.46          | BRAF; MEK                     |

| <b>Probeset ID</b> | <b>Symbol</b> | <b>Gene Name</b>                                                                            | <b>d-value</b> | <b>q-value</b> | <b>R-fold</b> | <b>Expression reversed by</b> |
|--------------------|---------------|---------------------------------------------------------------------------------------------|----------------|----------------|---------------|-------------------------------|
| 1415820_x_at       | Nono          | non-POU-domain-containing. octamer binding protein                                          | -4.98          | 0.00           | 0.70          | BRAF; MEK                     |
| 1439766_x_at       | Vegfc         | vascular endothelial growth factor C                                                        | -4.98          | 0.00           | 0.28          | BRAF; MEK                     |
| 1456698_s_at       | Hnrpd1        | heterogeneous nuclear ribonucleoprotein D-like                                              | -4.99          | 0.00           | 0.58          | BRAF; MEK                     |
| 1434801_x_at       | Slc25a5       | solute carrier family 25 (mitochondrial carrier. adenine nucleotide translocator). member 5 | -4.99          | 0.00           | 0.73          | BRAF                          |
| 1448679_at         | Hyal2         | hyaluronoglucosaminidase 2                                                                  | -4.99          | 0.00           | 0.72          | BRAF; MEK                     |
| 1416791_a_at       | Nxf1          | nuclear RNA export factor 1 homolog (S. cerevisiae)                                         | -4.99          | 0.00           | 0.65          | BRAF; MEK                     |
| 1435222_at         | Foxp1         | forkhead box P1                                                                             | -4.99          | 0.00           | 0.67          |                               |
| 1426958_at         | Rps9          | ribosomal protein S9                                                                        | -4.99          | 0.00           | 0.45          | BRAF; MEK                     |
| 1448283_a_at       | Uba2          | ubiquitin-like modifier activating enzyme 2                                                 | -4.99          | 0.00           | 0.64          | BRAF; MEK                     |
| 1451402_at         | Ecd           | ecdysoneless homolog (Drosophila)                                                           | -4.99          | 0.00           | 0.60          | BRAF; MEK                     |
| 1427159_at         | Pcf11         | cleavage and polyadenylation factor subunit homolog (S. cerevisiae)                         | -4.99          | 0.00           | 0.66          | BRAF; MEK                     |
| 1451190_a_at       | Sbk1          | SH3-binding kinase 1                                                                        | -5.00          | 0.00           | 0.41          | BRAF; MEK                     |
| 1417041_at         | Rpo1-1        | RNA polymerase 1-1                                                                          | -5.00          | 0.00           | 0.66          | BRAF; MEK                     |
| 1452852_at         | Twistnb       | TWIST neighbor                                                                              | -5.00          | 0.00           | 0.74          | BRAF                          |
| 1416778_at         | Sdpr          | serum deprivation response                                                                  | -5.00          | 0.00           | 0.72          | ; n.r.                        |
| 1437743_at         | Aebp2         | AE binding protein 2                                                                        | -5.00          | 0.00           | 0.61          | BRAF; n.r.                    |
| 1427317_at         | Kin           | antigenic determinant of rec-A protein                                                      | -5.00          | 0.00           | 0.76          |                               |
| 1416256_a_at       | Tubb5         | tubulin. beta 5                                                                             | -5.00          | 0.00           | 0.78          | BRAF; MEK                     |
| 1432179_x_at       | 2810433K01Rik | RIKEN cDNA 2810433K01 gene                                                                  | -5.00          | 0.00           | 0.57          | BRAF; MEK                     |
| 1427083_a_at       | Map4k5        | mitogen-activated protein kinase kinase kinase 5                                            | -5.01          | 0.00           | 0.71          |                               |
| 1417057_a_at       | Ppid          | peptidylprolyl isomerase D (cyclophilin D)                                                  | -5.01          | 0.00           | 0.57          | BRAF; MEK                     |
| 1443394_at         | NA            | NA                                                                                          | -5.01          | 0.00           | 0.27          | BRAF; MEK                     |
| 1452315_at         | Kif11         | kinesin family member 11                                                                    | -5.01          | 0.00           | 0.32          | ; n.r.                        |
| 1431893_a_at       | Pdss1         | prenyl (solanesyl) diphosphate synthase. subunit 1                                          | -5.01          | 0.00           | 0.41          | BRAF; MEK                     |
| 1460221_at         | Ptges3        | prostaglandin E synthase 3 (cytosolic)                                                      | -5.01          | 0.00           | 0.74          | BRAF; MEK                     |
| 1455943_at         | Zfp451        | zinc finger protein 451                                                                     | -5.01          | 0.00           | 0.68          | ; MEK                         |
| 1426609_at         | Dis3          | DIS3 mitotic control homolog (S. cerevisiae)                                                | -5.02          | 0.00           | 0.46          | BRAF; MEK                     |
| 1426323_x_at       | Siva1         | SIVA1. apoptosis-inducing factor                                                            | -5.02          | 0.00           | 0.61          | BRAF; MEK                     |
| 1425029_a_at       | Mboat2        | membrane bound O-acyltransferase domain containing 2                                        | -5.02          | 0.00           | 0.60          | BRAF; MEK                     |
| 1436018_at         | Mex3a         | mex3 homolog A (C. elegans)                                                                 | -5.02          | 0.00           | 0.65          | BRAF; MEK                     |
| 1428105_at         | Tpx2          | TPX2. microtubule-associated protein homolog (Xenopus laevis)                               | -5.02          | 0.00           | 0.45          | BRAF; MEK                     |
| 1447766_x_at       | Limd2         | LIM domain containing 2                                                                     | -5.02          | 0.00           | 0.69          | BRAF; MEK                     |
| 1435669_at         | Zfp532        | zinc finger protein 532                                                                     | -5.02          | 0.00           | 0.67          | BRAF; MEK                     |
| 1422844_a_at       | Wdr77         | WD repeat domain 77                                                                         | -5.02          | 0.00           | 0.67          | BRAF; MEK                     |
| 1426290_at         | Dimt1         | DIM1 dimethyladenosine transferase 1-like (S. cerevisiae)                                   | -5.02          | 0.00           | 0.71          | ; n.r.                        |
| 1422495_a_at       | Hmgn1         | high mobility group nucleosomal binding domain 1                                            | -5.03          | 0.00           | 0.76          | BRAF; MEK                     |
| 1440924_at         | Kif20b        | kinesin family member 20B                                                                   | -5.03          | 0.00           | 0.45          |                               |
| 1450929_at         | Zfp57         | zinc finger protein 57                                                                      | -5.03          | 0.00           | 0.57          | BRAF; MEK                     |
| 1454801_at         | Ankrd28       | ankyrin repeat domain 28                                                                    | -5.03          | 0.00           | 0.51          | BRAF; MEK                     |
| 1439758_at         | Als2cr12      | amyotrophic lateral sclerosis 2 (juvenile) chromosome region. candidate 12 (human)          | -5.03          | 0.00           | 0.29          | BRAF; MEK                     |
| 1437414_at         | Zfp217        | zinc finger protein 217                                                                     | -5.03          | 0.00           | 0.52          | BRAF; MEK                     |
| 1452838_at         | Ddx10         | DEAD (Asp-Glu-Ala-Asp) box polypeptide 10                                                   | -5.03          | 0.00           | 0.67          | ; MEK                         |
| 1417242_at         | Eif4a3        | eukaryotic translation initiation factor 4A. isoform 3                                      | -5.03          | 0.00           | 0.74          | BRAF; MEK                     |
| 1452877_at         | 2700029M09Rik | RIKEN cDNA 2700029M09 gene                                                                  | -5.04          | 0.00           | 0.58          | BRAF; MEK                     |
| 1454032_at         | Neto2         | neuropilin (NRP) and tolloid (TLL)-like 2                                                   | -5.04          | 0.00           | 0.57          | ; MEK                         |
| 1422442_at         | Smu1          | smu-1 suppressor of mec-8 and unc-52 homolog (C. elegans)                                   | -5.04          | 0.00           | 0.83          | BRAF; MEK                     |
| 1436854_at         | Trpc2         | transient receptor potential cation channel. subfamily C. member 2                          | -5.04          | 0.00           | 0.72          | ; MEK                         |
| 1455127_at         | Xkr5          | X Kell blood group precursor-related family. member 5                                       | -5.04          | 0.00           | 0.64          | BRAF; MEK                     |
| 1438761_a_at       | EG666231      | predicted gene. EG666231                                                                    | -5.04          | 0.00           | 0.66          | BRAF; MEK                     |
| 1423620_at         | Cenpq         | centromere protein Q                                                                        | -5.05          | 0.00           | 0.37          | BRAF; MEK                     |
| 1427164_at         | Il13ra1       | interleukin 13 receptor. alpha 1                                                            | -5.05          | 0.00           | 0.38          | ; MEK                         |
| 1437700_at         | Schip1        | schwannomin interacting protein 1                                                           | -5.05          | 0.00           | 0.49          |                               |
| 1422663_at         | Orc1l         | origin recognition complex. subunit 1-like (S.cereviaiae)                                   | -5.05          | 0.00           | 0.40          | BRAF; MEK                     |
| 1448373_at         | Mrpl18        | mitochondrial ribosomal protein L18                                                         | -5.05          | 0.00           | 0.61          | BRAF                          |
| 1417453_at         | Cul4b         | cullin 4B                                                                                   | -5.06          | 0.00           | 0.67          | ; MEK                         |

| <b>Probeset ID</b> | <b>Symbol</b> | <b>Gene Name</b>                                                                            | <b>d-value</b> | <b>q-value</b> | <b>R-fold</b> | <b>Expression reversed by</b> |
|--------------------|---------------|---------------------------------------------------------------------------------------------|----------------|----------------|---------------|-------------------------------|
| 1424136_a_at       | Pp1h          | peptidyl prolyl isomerase H                                                                 | -5.06          | 0.00           | 0.60          | BRAF; MEK                     |
| 1448838_at         | Topors        | topoisomerase I binding. arginine/serine-rich                                               | -5.06          | 0.00           | 0.64          | BRAF; MEK                     |
| 1415772_at         | Ncl           | nucleolin                                                                                   | -5.06          | 0.00           | 0.53          | BRAF; MEK                     |
| 1434911_s_at       | Arhgap19      | Rho GTPase activating protein 19                                                            | -5.07          | 0.00           | 0.53          | BRAF; MEK                     |
| 1456721_at         | Thsd7a        | thrombospondin. type I. domain containing 7A                                                | -5.07          | 0.00           | 0.60          | BRAF; MEK                     |
| 1417192_at         | Tomm70a       | translocase of outer mitochondrial membrane 70 homolog A (yeast)                            | -5.07          | 0.00           | 0.58          | BRAF                          |
| 1443999_at         | NA            | NA                                                                                          | -5.08          | 0.00           | 0.71          | BRAF; MEK                     |
| 1416557_a_at       | Eftud2        | elongation factor Tu GTP binding domain containing 2                                        | -5.08          | 0.00           | 0.65          | BRAF; MEK                     |
| 1451343_at         | Vps36         | vacuolar protein sorting 36 (yeast)                                                         | -5.08          | 0.00           | 0.70          | BRAF                          |
| 1416942_at         | Erap1         | endoplasmic reticulum aminopeptidase 1                                                      | -5.08          | 0.00           | 0.64          | BRAF; MEK                     |
| 1455154_at         | Gli3          | GLI-Kruppel family member GLI3                                                              | -5.08          | 0.00           | 0.56          | BRAF; MEK                     |
| 1451430_at         | Slit2         | slit homolog 2 (Drosophila)                                                                 | -5.08          | 0.00           | 0.74          | ; MEK                         |
| 1448720_at         | Lrrc40        | leucine rich repeat containing 40                                                           | -5.09          | 0.00           | 0.60          | BRAF; MEK                     |
| 1453067_at         | Aptd1         | apoptosis-inducing. TAF9-like domain 1                                                      | -5.09          | 0.00           | 0.53          | BRAF; MEK                     |
| 1434119_at         | D2Wsu81e      | DNA segment. Chr 2. Wayne State University 81. expressed                                    | -5.09          | 0.00           | 0.81          | BRAF; MEK                     |
| 1449349_at         | Nudt1         | nudix (nucleoside diphosphate linked moiety X)-type motif 1                                 | -5.09          | 0.00           | 0.65          | BRAF; MEK                     |
| 1452231_x_at       | Ifi205        | interferon activated gene 205                                                               | -5.09          | 0.00           | 0.57          | ; MEK                         |
| 1424110_a_at       | Nme1          | non-metastatic cells 1. protein (NM23A) expressed in                                        | -5.09          | 0.00           | 0.66          | BRAF; MEK                     |
| 1415803_at         | Cx3cl1        | chemokine (C-X3-C motif) ligand 1                                                           | -5.09          | 0.00           | 0.39          | BRAF                          |
| 1451775_s_at       | Il13ra1       | interleukin 13 receptor. alpha 1                                                            | -5.09          | 0.00           | 0.34          | ; MEK                         |
| 1437480_at         | 1110001A07Rik | RIKEN cDNA 1110001A07 gene                                                                  | -5.09          | 0.00           | 0.55          | BRAF; MEK                     |
| 1418726_a_at       | Tnnt2         | troponin T2. cardiac                                                                        | -5.09          | 0.00           | 0.16          | BRAF; MEK                     |
| 1424092_at         | Epb4.1        | erythrocyte protein band 4.1                                                                | -5.09          | 0.00           | 0.45          | BRAF; MEK                     |
| 1424766_at         | Erc6l         | excision repair cross-complementing rodent repair deficiency complementation group 6 - like | -5.10          | 0.00           | 0.34          | BRAF; MEK                     |
| 1442322_at         | NA            | NA                                                                                          | -5.10          | 0.00           | 0.77          | ; MEK                         |
| 1425177_at         | Shmt1         | serine hydroxymethyltransferase 1 (soluble)                                                 | -5.10          | 0.00           | 0.69          | BRAF; MEK                     |
| 1418942_at         | Ilf74         | intraflagellar transport 74 homolog (Chlamydomonas)                                         | -5.10          | 0.00           | 0.63          | ; MEK                         |
| 1448236_at         | Rdx           | radixin                                                                                     | -5.10          | 0.00           | 0.68          | BRAF; MEK                     |
| 1423456_at         | Bzw2          | basic leucine zipper and W2 domains 2                                                       | -5.11          | 0.00           | 0.58          | BRAF; MEK                     |
| 1415995_at         | Casp6         | caspase 6                                                                                   | -5.11          | 0.00           | 0.72          | BRAF; MEK                     |
| 1419452_at         | Uchl5         | ubiquitin carboxyl-terminal esterase L5                                                     | -5.11          | 0.00           | 0.55          | BRAF; MEK                     |
| 1457832_at         | NA            | NA                                                                                          | -5.11          | 0.00           | 0.68          | n.r. ; n.r.                   |
| 1417139_at         | Dsn1          | DSN1. MIND kinetochore complex component. homolog (S. cerevisiae)                           | -5.11          | 0.00           | 0.56          | BRAF; MEK                     |
| 1421023_at         | Pik3c2a       | phosphatidylinositol 3-kinase. C2 domain containing. alpha polypeptide                      | -5.11          | 0.00           | 0.66          | n.r. ; n.r.                   |
| 1451400_at         | Gemin8        | gem (nuclear organelle) associated protein 8                                                | -5.11          | 0.00           | 0.60          | BRAF; MEK                     |
| 1422502_at         | Parp1         | poly (ADP-ribose) polymerase family. member 1                                               | -5.11          | 0.00           | 0.62          | BRAF; MEK                     |
| 1435497_at         | 5730590G19Rik | RIKEN cDNA 5730590G19 gene                                                                  | -5.11          | 0.00           | 0.48          | BRAF; MEK                     |
| 1430147_a_at       | Josd3         | Josephin domain containing 3                                                                | -5.11          | 0.00           | 0.61          |                               |
| 1423755_at         | Zcchc8        | zinc finger. CCHC domain containing 8                                                       | -5.12          | 0.00           | 0.59          | BRAF; MEK                     |
| 1416037_a_at       | Cct2          | chaperonin containing Tcp1. subunit 2 (beta)                                                | -5.12          | 0.00           | 0.74          | BRAF; MEK                     |
| 1438922_x_at       | Slc25a5       | solute carrier family 25 (mitochondrial carrier. adenine nucleotide translocator). member 5 | -5.12          | 0.00           | 0.60          | BRAF; MEK                     |
| 1418035_a_at       | Prim2         | DNA primase. p58 subunit                                                                    | -5.12          | 0.00           | 0.53          | BRAF; MEK                     |
| 1451306_at         | Cdca71        | cell division cycle associated 7 like                                                       | -5.13          | 0.00           | 0.41          | BRAF; MEK                     |
| 1436000_a_at       | Skp2          | S-phase kinase-associated protein 2 (p45)                                                   | -5.13          | 0.00           | 0.36          | BRAF; MEK                     |
| 1429461_at         | Ints2         | integrator complex subunit 2                                                                | -5.13          | 0.00           | 0.72          | BRAF; MEK                     |
| 1424300_at         | Gemin6        | gem (nuclear organelle) associated protein 6                                                | -5.13          | 0.00           | 0.48          | BRAF; MEK                     |
| 1456308_x_at       | Trim28        | tripartite motif-containing 28                                                              | -5.13          | 0.00           | 0.62          | BRAF; MEK                     |
| 1430271_x_at       | Josd3         | Josephin domain containing 3                                                                | -5.13          | 0.00           | 0.60          |                               |
| 1422788_at         | Slc43a3       | solute carrier family 43. member 3                                                          | -5.13          | 0.00           | 0.48          | BRAF; n.r.                    |
| 1449147_at         | Chst1         | carbohydrate (keratan sulfate Gal-6) sulfotransferase 1                                     | -5.13          | 0.00           | 0.35          | BRAF; MEK                     |
| 1438161_s_at       | Rfc4          | replication factor C (activator 1) 4                                                        | -5.13          | 0.00           | 0.35          | BRAF; MEK                     |
| 1457944_at         | NA            | NA                                                                                          | -5.14          | 0.00           | 0.49          | BRAF; MEK                     |
| 1434401_at         | Zcchc2        | zinc finger. CCHC domain containing 2                                                       | -5.14          | 0.00           | 0.64          | BRAF                          |

| <b>Probeset ID</b> | <b>Symbol</b>     | <b>Gene Name</b>                                                       | <b>d-value</b> | <b>q-value</b> | <b>R-fold</b> | <b>Expression reversed by</b> |
|--------------------|-------------------|------------------------------------------------------------------------|----------------|----------------|---------------|-------------------------------|
| 1418761_at         | Igf2bp1           | insulin-like growth factor 2 mRNA binding protein 1                    | -5.14          | 0.00           | 0.49          | BRAF; MEK                     |
| 1420497_a_at       | Cebpz             | CCAAT/enhancer binding protein zeta                                    | -5.14          | 0.00           | 0.59          | BRAF; MEK                     |
| 1419786_at         | Ltbp1             | latent transforming growth factor beta binding protein 1               | -5.14          | 0.00           | 0.69          | ; MEK                         |
| 1420498_a_at       | Dab2              | disabled homolog 2 (Drosophila)                                        | -5.14          | 0.00           | 0.72          | BRAF; MEK                     |
| 1435324_x_at       | Hmgb1             | high mobility group box 1                                              | -5.14          | 0.00           | 0.49          | BRAF; MEK                     |
| 1437187_at         | E2f7              | E2F transcription factor 7                                             | -5.14          | 0.00           | 0.30          | BRAF; MEK                     |
| 1449414_at         | Zfp53             | zinc finger protein 53                                                 | -5.14          | 0.00           | 0.55          | ; MEK                         |
| 1415771_at         | Ncl               | nucleolin                                                              | -5.15          | 0.00           | 0.57          | BRAF; MEK                     |
| 1436935_x_at       | ENSMUSG0000056003 | predicted gene. ENSMUSG0000056003                                      | -5.15          | 0.00           | 0.76          | BRAF; MEK                     |
| 1433892_at         | Spag5             | sperm associated antigen 5                                             | -5.15          | 0.00           | 0.31          | BRAF; MEK                     |
| 1454951_at         | Zfp606            | zinc finger protein 606                                                | -5.16          | 0.00           | 0.58          | ; MEK                         |
| 1443978_at         | Ankle1            | ankyrin repeat and LEM domain containing 1                             | -5.16          | 0.00           | 0.64          | ; MEK                         |
| 1435595_at         | 1810011O10Rik     | RIKEN cDNA 1810011O10 gene                                             | -5.16          | 0.00           | 0.42          | BRAF; MEK                     |
| 1420932_at         | Mapk8             | mitogen-activated protein kinase 8                                     | -5.16          | 0.00           | 0.78          |                               |
| 1428648_at         | Cand1             | cullin associated and neddylation disassociated 1                      | -5.17          | 0.00           | 0.77          | BRAF; MEK                     |
| 1438095_x_at       | Noc4l             | nucleolar complex associated 4 homolog (S. cerevisiae)                 | -5.17          | 0.00           | 0.56          | BRAF; MEK                     |
| 1434942_at         | Esf1              | ESF1. nucleolar pre-rRNA processing protein. homolog (S. cerevisiae)   | -5.17          | 0.00           | 0.53          | ; MEK                         |
| 1416796_at         | Nck2              | non-catalytic region of tyrosine kinase adaptor protein 2              | -5.17          | 0.00           | 0.63          | BRAF; MEK                     |
| 1436412_at         | NA                | NA                                                                     | -5.17          | 0.00           | 0.71          |                               |
| 1426015_s_at       | Asph              | aspartate-beta-hydroxylase                                             | -5.17          | 0.00           | 0.51          | BRAF; MEK                     |
| 1454896_at         | Rbpj              | recombination signal binding protein for immunoglobulin kappa J region | -5.17          | 0.00           | 0.53          | BRAF; MEK                     |
| 1438390_s_at       | Pttg1             | pituitary tumor-transforming 1                                         | -5.18          | 0.00           | 0.42          | BRAF; MEK                     |
| 1436796_at         | Matr3             | matrin 3                                                               | -5.18          | 0.00           | 0.53          | ; MEK                         |
| 1455592_at         | Vangl2            | vang-like 2 (van gogh. Drosophila)                                     | -5.18          | 0.00           | 0.50          | BRAF; MEK                     |
| 1431225_at         | NA                | NA                                                                     | -5.18          | 0.00           | 0.47          | BRAF; MEK                     |
| 1460247_a_at       | Skp2              | S-phase kinase-associated protein 2 (p45)                              | -5.19          | 0.00           | 0.38          | BRAF; MEK                     |
| 1453186_at         | Sfrs18            | splicing factor. arginine/serine-rich 18                               | -5.19          | 0.00           | 0.56          | ; MEK                         |
| 1437408_at         | Gpr126            | G protein-coupled receptor 126                                         | -5.20          | 0.00           | 0.61          | BRAF                          |
| 1445226_at         | BC023969          | cDNA sequence BC023969                                                 | -5.20          | 0.00           | 0.46          | BRAF; MEK                     |
| 1418675_at         | Osmr              | oncostatin M receptor                                                  | -5.20          | 0.00           | 0.32          | ; MEK                         |
| 1423026_at         | Rad51c            | Rad51 homolog c (S. cerevisiae)                                        | -5.20          | 0.00           | 0.51          | BRAF                          |
| 1447787_x_at       | Gjc1              | gap junction protein. gamma 1                                          | -5.20          | 0.00           | 0.46          | BRAF                          |
| 1416928_at         | Rbm12             | RNA binding motif protein 12                                           | -5.21          | 0.00           | 0.70          | BRAF; MEK                     |
| 1433960_at         | Isg20l2           | interferon stimulated exonuclease gene 20-like 2                       | -5.21          | 0.00           | 0.65          | BRAF; MEK                     |
| 1428315_at         | Ebna1bp2          | EBNA1 binding protein 2                                                | -5.21          | 0.00           | 0.60          | BRAF; MEK                     |
| 1427061_at         | Rbbp8             | retinoblastoma binding protein 8                                       | -5.21          | 0.00           | 0.56          | BRAF; MEK                     |
| 1416167_at         | Prdx4             | peroxiredoxin 4                                                        | -5.21          | 0.00           | 0.69          | BRAF; MEK                     |
| 1433996_at         | Suv39h2           | suppressor of variegation 3-9 homolog 2 (Drosophila)                   | -5.21          | 0.00           | 0.52          | BRAF; MEK                     |
| 1436892_at         | Spred2            | sprouty-related. EVH1 domain containing 2                              | -5.21          | 0.00           | 0.46          | BRAF; MEK                     |
| 1425006_a_at       | Vrk1              | vaccinia related kinase 1                                              | -5.22          | 0.00           | 0.48          | BRAF; MEK                     |
| 1428227_at         | Rest              | RE1-silencing transcription factor                                     | -5.22          | 0.00           | 0.72          | BRAF; MEK                     |
| 1422488_at         | Nxt1              | NTF2-related export protein 1                                          | -5.22          | 0.00           | 0.64          | BRAF; MEK                     |
| 1425767_a_at       | Six4              | sine oculis-related homeobox 4 homolog (Drosophila)                    | -5.22          | 0.00           | 0.53          | BRAF; MEK                     |
| 1456528_x_at       | Ncl               | nucleolin                                                              | -5.23          | 0.00           | 0.64          | BRAF; MEK                     |
| 1448232_x_at       | Tuba1c            | tubulin. alpha 1C                                                      | -5.23          | 0.00           | 0.60          | BRAF; MEK                     |
| 1442821_at         | NA                | NA                                                                     | -5.23          | 0.00           | 0.70          |                               |
| 1424348_at         | 1110007A13Rik     | RIKEN cDNA 1110007A13 gene                                             | -5.23          | 0.00           | 0.56          | BRAF                          |
| 1448413_at         | 2410016O06Rik     | RIKEN cDNA 2410016O06 gene                                             | -5.23          | 0.00           | 0.66          | BRAF; MEK                     |
| 1438453_at         | Rad51c            | Rad51 homolog c (S. cerevisiae)                                        | -5.23          | 0.00           | 0.65          | BRAF; MEK                     |
| 1424613_at         | Gprc5b            | G protein-coupled receptor. family C. group 5. member B                | -5.24          | 0.00           | 0.53          | BRAF; MEK                     |
| 1424948_x_at       | H2-K1             | histocompatibility 2. K1. K region                                     | -5.24          | 0.00           | 0.28          | ; MEK                         |
| 1453370_at         | Troap             | trophinin associated protein                                           | -5.24          | 0.00           | 0.40          | BRAF; MEK                     |
| 1437549_at         | 2810408I11Rik     | RIKEN cDNA 2810408I11 gene                                             | -5.24          | 0.00           | 0.57          | BRAF; MEK                     |
| 1426684_at         | Cnot6             | CCR4-NOT transcription complex. subunit 6                              | -5.24          | 0.00           | 0.64          | ; MEK                         |
| 1426235_a_at       | Glul              | glutamate-ammonia ligase (glutamine synthetase)                        | -5.24          | 0.00           | 0.50          | BRAF; MEK                     |



| <b>Probeset ID</b> | <b>Symbol</b> | <b>Gene Name</b>                                                                              | <b>d-value</b> | <b>q-value</b> | <b>R-fold</b> | <b>Expression reversed by</b> |
|--------------------|---------------|-----------------------------------------------------------------------------------------------|----------------|----------------|---------------|-------------------------------|
| 1429087_at         | 1110054O05Rik | RIKEN cDNA 1110054O05 gene                                                                    | -5.25          | 0.00           | 0.71          | BRAF                          |
| 1423525_at         | Mastl         | microtubule associated serine/threonine kinase-like                                           | -5.25          | 0.00           | 0.50          | BRAF; MEK                     |
| 1435108_at         | Arhgap22      | Rho GTPase activating protein 22                                                              | -5.25          | 0.00           | 0.67          | BRAF; MEK                     |
| 1424500_at         | Utp6          | UTP6. small subunit (SSU) processome component. homolog (yeast)                               | -5.26          | 0.00           | 0.59          |                               |
| 1420876_a_at       | Sept6         | septin 6                                                                                      | -5.26          | 0.00           | 0.48          | ; MEK                         |
| 1418736_at         | B3galnt1      | UDP-GalNAc:betaGlcNAc beta 1.3-galactosaminyltransferase. polypeptide 1                       | -5.26          | 0.00           | 0.42          | ; MEK                         |
| 1438554_x_at       | Eif4h         | eukaryotic translation initiation factor 4H                                                   | -5.26          | 0.00           | 0.79          | BRAF; MEK                     |
| 1456079_x_at       | Apex1         | apurinic/aprimidinic endonuclease 1                                                           | -5.26          | 0.00           | 0.64          | BRAF; MEK                     |
| 1419397_at         | Pola1         | polymerase (DNA directed). alpha 1                                                            | -5.27          | 0.00           | 0.25          | BRAF; MEK                     |
| 1424156_at         | Rbl1          | retinoblastoma-like 1 (p107)                                                                  | -5.27          | 0.00           | 0.30          | BRAF; MEK                     |
| 1448633_at         | Prp31         | PRP31 pre-mRNA processing factor 31 homolog (yeast)                                           | -5.27          | 0.00           | 0.72          | BRAF; MEK                     |
| 1424105_a_at       | Pttg1         | pituitary tumor-transforming 1                                                                | -5.28          | 0.00           | 0.36          | BRAF; MEK                     |
| 1433935_at         | AU020206      | expressed sequence AU020206                                                                   | -5.28          | 0.00           | 0.31          | BRAF; MEK                     |
| 1416095_x_at       | 1110005A23Rik | RIKEN cDNA 1110005A23 gene                                                                    | -5.28          | 0.00           | 0.80          | ; MEK                         |
| 1416034_at         | Cd24a         | CD24a antigen                                                                                 | -5.28          | 0.00           | 0.26          | BRAF; MEK                     |
| 1424208_at         | Ptger4        | prostaglandin E receptor 4 (subtype EP4)                                                      | -5.28          | 0.00           | 0.48          | BRAF; MEK                     |
| 1426930_at         | Brunol4       | bruno-like 4. RNA binding protein (Drosophila)                                                | -5.29          | 0.00           | 0.40          | BRAF; MEK                     |
| 1452339_at         | Adamts7       | a disintegrin-like and metallopeptidase (reprolysin type) with thrombospondin type 1 motif. 7 | -5.30          | 0.00           | 0.61          | BRAF; MEK                     |
| 1448706_at         | Ttrap         | Traf and Tnf receptor associated protein                                                      | -5.30          | 0.00           | 0.59          | BRAF; MEK                     |
| 1452115_a_at       | Plk4          | polo-like kinase 4 (Drosophila)                                                               | -5.30          | 0.00           | 0.31          | BRAF                          |
| 1426929_at         | Brunol4       | bruno-like 4. RNA binding protein (Drosophila)                                                | -5.30          | 0.00           | 0.47          | BRAF; MEK                     |
| 1417037_at         | Orc6l         | origin recognition complex. subunit 6-like (S. cerevisiae)                                    | -5.30          | 0.00           | 0.56          | BRAF; MEK                     |
| 1448224_at         | Tfam          | transcription factor A. mitochondrial                                                         | -5.30          | 0.00           | 0.60          | BRAF; MEK                     |
| 1456748_a_at       | Nipsnap1      | 4-nitrophenylphosphatase domain and non-neuronal SNAP25-like protein homolog 1 (C. elegans)   | -5.30          | 0.00           | 0.58          | BRAF; MEK                     |
| 1452831_s_at       | Ppat          | phosphoribosyl pyrophosphate amidotransferase                                                 | -5.30          | 0.00           | 0.50          | BRAF; MEK                     |
| 1452662_a_at       | Eif2s1        | eukaryotic translation initiation factor 2. subunit 1 alpha                                   | -5.30          | 0.00           | 0.69          | BRAF; MEK                     |
| 1424704_at         | Runx2         | runt related transcription factor 2                                                           | -5.30          | 0.00           | 0.37          | ; MEK                         |
| 1454739_at         | Cdc27         | cell division cycle 27 homolog (S. cerevisiae)                                                | -5.30          | 0.00           | 0.77          | n.r. ; MEK                    |
| 1455141_at         | Tnrc6a        | trinucleotide repeat containing 6a                                                            | -5.31          | 0.00           | 0.69          | n.r. ;                        |
| 1442280_at         | D2Erd750e     | DNA segment. Chr 2. ERATO Doi 750. expressed                                                  | -5.31          | 0.00           | 0.40          | BRAF; MEK                     |
| 1442134_at         | Prr11         | proline rich 11                                                                               | -5.31          | 0.00           | 0.50          | BRAF; MEK                     |
| 1429184_at         | 100042856     | predicted gene. 100042856                                                                     | -5.31          | 0.00           | 0.13          | ; MEK                         |
| 1439553_s_at       | Nutf2         | nuclear transport factor 2                                                                    | -5.31          | 0.00           | 0.70          | BRAF; MEK                     |
| 1434079_s_at       | Mcm2          | minichromosome maintenance deficient 2 mitotin (S. cerevisiae)                                | -5.31          | 0.00           | 0.35          | BRAF; MEK                     |
| 1449115_at         | Mtf2          | metal response element binding transcription factor 2                                         | -5.31          | 0.00           | 0.55          | BRAF; MEK                     |
| 1452459_at         | Aspm          | asp (abnormal spindle)-like. microcephaly associated (Drosophila)                             | -5.32          | 0.00           | 0.43          | BRAF; MEK                     |
| 1434668_at         | Nucks1        | nuclear casein kinase and cyclin-dependent kinase substrate 1                                 | -5.32          | 0.00           | 0.66          |                               |
| 1433739_at         | Nol10         | nucleolar protein 10                                                                          | -5.32          | 0.00           | 0.65          | BRAF; MEK                     |
| 1451845_a_at       | Pth2          | peptidyl-tRNA hydrolase 2                                                                     | -5.32          | 0.00           | 0.66          | BRAF; MEK                     |
| 1435086_s_at       | Klhdc2        | kelch domain containing 2                                                                     | -5.32          | 0.00           | 0.61          | BRAF; MEK                     |
| 1451459_at         | Ahctf1        | AT hook containing transcription factor 1                                                     | -5.32          | 0.00           | 0.58          | BRAF; MEK                     |
| 1456375_x_at       | Trim27        | tripartite motif-containing 27                                                                | -5.32          | 0.00           | 0.69          | BRAF                          |
| 1423614_at         | Lrrc8c        | leucine rich repeat containing 8 family. member C                                             | -5.33          | 0.00           | 0.44          | ; n.r.                        |
| 1418016_at         | Pum2          | pumilio 2 (Drosophila)                                                                        | -5.33          | 0.00           | 0.72          | BRAF; MEK                     |
| 1423712_a_at       | Qars          | glutaminyl-tRNA synthetase                                                                    | -5.33          | 0.00           | 0.80          | BRAF; MEK                     |
| 1441340_at         | Cep68         | centrosomal protein 68                                                                        | -5.33          | 0.00           | 0.60          | BRAF; MEK                     |
| 1453077_a_at       | Snappc3       | small nuclear RNA activating complex. polypeptide 3                                           | -5.33          | 0.00           | 0.62          | n.r. ; n.r.                   |
| 1433795_at         | Tgfr3         | transforming growth factor. beta receptor III                                                 | -5.33          | 0.00           | 0.41          | BRAF; MEK                     |
| 1456415_at         | Zfp451        | zinc finger protein 451                                                                       | -5.33          | 0.00           | 0.56          | ; MEK                         |
| 1452917_at         | Rfc5          | replication factor C (activator 1) 5                                                          | -5.34          | 0.00           | 0.40          | BRAF; MEK                     |
| 1447935_at         | Fancm         | Fanconi anemia. complementation group M                                                       | -5.34          | 0.00           | 0.68          | BRAF; MEK                     |
| 1447815_x_at       | 6430527G18Rik | RIKEN cDNA 6430527G18 gene                                                                    | -5.34          | 0.00           | 0.82          | BRAF; MEK                     |
| 1421937_at         | Dapp1         | dual adaptor for phosphotyrosine and 3-phosphoinositides 1                                    | -5.34          | 0.00           | 0.64          | BRAF; MEK                     |
| 1419716_a_at       | Pou2f1        | POU domain. class 2. transcription factor 1                                                   | -5.34          | 0.00           | 0.67          | BRAF; MEK                     |



| <b>Probeset ID</b> | <b>Symbol</b> | <b>Gene Name</b>                                                                            | <b>d-value</b> | <b>q-value</b> | <b>R-fold</b> | <b>Expression reversed by</b> |
|--------------------|---------------|---------------------------------------------------------------------------------------------|----------------|----------------|---------------|-------------------------------|
| 1438307_at         | NA            | NA                                                                                          | -5.34          | 0.00           | 0.49          | BRAF; MEK                     |
| 1435773_at         | 4930547N16Rik | RIKEN cDNA 4930547N16 gene                                                                  | -5.34          | 0.00           | 0.36          | BRAF; MEK                     |
| 1438835_a_at       | Eftud2        | elongation factor Tu GTP binding domain containing 2                                        | -5.35          | 0.00           | 0.66          | BRAF; MEK                     |
| 1424827_a_at       | Csnk1a1       | casein kinase 1. alpha 1                                                                    | -5.35          | 0.00           | 0.75          | ; MEK                         |
| 1437319_at         | Unc13c        | unc-13 homolog C (C. elegans)                                                               | -5.35          | 0.00           | 0.63          | BRAF; MEK                     |
| 1438376_s_at       | Trim27        | tripartite motif-containing 27                                                              | -5.35          | 0.00           | 0.66          | BRAF                          |
| 1451641_at         | Dbr1          | debranching enzyme homolog 1 (S. cerevisiae)                                                | -5.35          | 0.00           | 0.62          | BRAF; MEK                     |
| 1443733_x_at       | Pold3         | polymerase (DNA-directed). delta 3. accessory subunit                                       | -5.35          | 0.00           | 0.60          | BRAF; MEK                     |
| 1434936_at         | Hirip3        | HIRA interacting protein 3                                                                  | -5.36          | 0.00           | 0.47          | BRAF; MEK                     |
| 1456240_x_at       | Cdca4         | cell division cycle associated 4                                                            | -5.36          | 0.00           | 0.53          | BRAF; MEK                     |
| 1460726_at         | Adss          | adenylosuccinate synthetase. non muscle                                                     | -5.36          | 0.00           | 0.71          | BRAF; MEK                     |
| 1434700_at         | 6030408C04Rik | RIKEN cDNA 6030408C04 gene                                                                  | -5.36          | 0.00           | 0.39          | BRAF; MEK                     |
| 1437780_at         | Fancb         | Fanconi anemia. complementation group B                                                     | -5.37          | 0.00           | 0.38          | BRAF; MEK                     |
| 1428512_at         | Bhlhb9        | basic helix-loop-helix domain containing. class B9                                          | -5.37          | 0.00           | 0.46          | BRAF; MEK                     |
| 1422802_at         | Defcr3        | defensin related cryptdin 3                                                                 | -5.37          | 0.00           | 0.56          | BRAF                          |
| 1426218_at         | Glcci1        | glucocorticoid induced transcript 1                                                         | -5.37          | 0.00           | 0.47          | BRAF                          |
| 1452912_at         | Dscc1         | defective in sister chromatid cohesion 1 homolog (S. cerevisiae)                            | -5.37          | 0.00           | 0.23          | BRAF; MEK                     |
| 1428661_at         | Nfkbil2       | nuclear factor of kappa light polypeptide gene enhancer in B-cells inhibitor-like 2         | -5.37          | 0.00           | 0.64          | BRAF; MEK                     |
| 1434705_at         | Ctbp2         | C-terminal binding protein 2                                                                | -5.38          | 0.00           | 0.73          | BRAF                          |
| 1438757_at         | C130069I09Rik | RIKEN cDNA C130069I09 gene                                                                  | -5.38          | 0.00           | 0.45          | BRAF; MEK                     |
| 1433829_a_at       | Hnmpa2b1      | heterogeneous nuclear ribonucleoprotein A2/B1                                               | -5.38          | 0.00           | 0.69          |                               |
| 1451119_a_at       | Fbln1         | fibulin 1                                                                                   | -5.38          | 0.00           | 0.38          | BRAF; MEK                     |
| 1436723_at         | Cenpi         | centromere protein I                                                                        | -5.39          | 0.00           | 0.31          | BRAF; MEK                     |
| 1418495_at         | Zc3h8         | zinc finger CCCH type containing 8                                                          | -5.39          | 0.00           | 0.72          | BRAF; MEK                     |
| 1429243_at         | 1110054O05Rik | RIKEN cDNA 1110054O05 gene                                                                  | -5.39          | 0.00           | 0.73          |                               |
| 1428167_a_at       | Mpzl1         | myelin protein zero-like 1                                                                  | -5.39          | 0.00           | 0.55          | BRAF; MEK                     |
| 1424202_at         | Seh1l         | SEH1-like (S. cerevisiae)                                                                   | -5.39          | 0.00           | 0.68          | BRAF                          |
| 1434682_at         | Zfp770        | zinc finger protein 770                                                                     | -5.39          | 0.00           | 0.58          | BRAF; MEK                     |
| 1416128_at         | Tuba1c        | tubulin. alpha 1C                                                                           | -5.39          | 0.00           | 0.64          | BRAF; MEK                     |
| 1423292_a_at       | Prx           | periaxin                                                                                    | -5.39          | 0.00           | 0.69          | BRAF; MEK                     |
| 1447877_x_at       | Dnmt1         | DNA methyltransferase (cytosine-5) 1                                                        | -5.39          | 0.00           | 0.31          | BRAF; MEK                     |
| 1424883_s_at       | Sfrs7         | splicing factor. arginine/serine-rich 7                                                     | -5.39          | 0.00           | 0.45          | BRAF; MEK                     |
| 1433879_a_at       | Mapk1ip1l     | mitogen-activated protein kinase 1 interacting protein 1-like                               | -5.40          | 0.00           | 0.74          | BRAF                          |
| 1426853_at         | Set           | SET translocation                                                                           | -5.40          | 0.00           | 0.62          | BRAF; MEK                     |
| 1427017_at         | Satb2         | special AT-rich sequence binding protein 2                                                  | -5.40          | 0.00           | 0.62          | BRAF; MEK                     |
| 1436979_x_at       | Rbm14         | RNA binding motif protein 14                                                                | -5.40          | 0.00           | 0.56          | BRAF; MEK                     |
| 1423877_at         | Chaf1b        | chromatin assembly factor 1. subunit B (p60)                                                | -5.40          | 0.00           | 0.36          | BRAF; MEK                     |
| 1437471_at         | Lrrc45        | leucine rich repeat containing 45                                                           | -5.41          | 0.00           | 0.67          | BRAF; MEK                     |
| 1437279_x_at       | Sdc1          | syndecan 1                                                                                  | -5.41          | 0.00           | 0.59          | BRAF; MEK                     |
| 1448192_s_at       | Prps1         | phosphoribosyl pyrophosphate synthetase 1                                                   | -5.41          | 0.00           | 0.57          | ; n.r.                        |
| 1438546_x_at       | Slc25a5       | solute carrier family 25 (mitochondrial carrier. adenine nucleotide translocator). member 5 | -5.41          | 0.00           | 0.71          | BRAF                          |
| 1436266_x_at       | Cbx1          | chromobox homolog 1 (Drosophila HP1 beta)                                                   | -5.41          | 0.00           | 0.64          | BRAF; MEK                     |
| 1434469_at         | Otud4         | OTU domain containing 4                                                                     | -5.42          | 0.00           | 0.47          | BRAF                          |
| 1424928_at         | 2210018M11Rik | RIKEN cDNA 2210018M11 gene                                                                  | -5.42          | 0.00           | 0.67          |                               |
| 1425350_a_at       | Myef2         | myelin basic protein expression factor 2. repressor                                         | -5.42          | 0.00           | 0.68          | BRAF; MEK                     |
| 1417938_at         | Rad51ap1      | RAD51 associated protein 1                                                                  | -5.42          | 0.00           | 0.32          | BRAF; MEK                     |
| 1428386_at         | Acsl3         | acyl-CoA synthetase long-chain family member 3                                              | -5.42          | 0.00           | 0.49          | BRAF; MEK                     |
| 1425048_a_at       | Hmgb1         | high mobility group box 1                                                                   | -5.42          | 0.00           | 0.57          | BRAF; MEK                     |
| 1452020_a_at       | Siva1         | SIVA1. apoptosis-inducing factor                                                            | -5.43          | 0.00           | 0.57          | BRAF                          |
| 1430811_a_at       | Nuf2          | NUF2. NDC80 kinetochore complex component. homolog (S. cerevisiae)                          | -5.43          | 0.00           | 0.28          | BRAF; MEK                     |
| 1416125_at         | Fkbp5         | FK506 binding protein 5                                                                     | -5.43          | 0.00           | 0.32          | BRAF; MEK                     |
| 1426835_at         | Metap1        | methionyl aminopeptidase 1                                                                  | -5.43          | 0.00           | 0.79          | BRAF                          |
| 1443832_s_at       | Sdpr          | serum deprivation response                                                                  | -5.43          | 0.00           | 0.65          | n.r. ; n.r.                   |
| 1417511_at         | Lyar          | Ly1 antibody reactive clone                                                                 | -5.43          | 0.00           | 0.47          | BRAF; MEK                     |

| <b>Probeset ID</b> | <b>Symbol</b> | <b>Gene Name</b>                                                           | <b>d-value</b> | <b>q-value</b> | <b>R-fold</b> | <b>Expression reversed by</b> |
|--------------------|---------------|----------------------------------------------------------------------------|----------------|----------------|---------------|-------------------------------|
| 1436174_at         | Atad2         | ATPase family, AAA domain containing 2                                     | -5.43          | 0.00           | 0.30          | BRAF; MEK                     |
| 1426496_at         | Wdr55         | WD repeat domain 55                                                        | -5.43          | 0.00           | 0.64          | BRAF                          |
| 1418542_s_at       | Cenpo         | centromere protein O                                                       | -5.44          | 0.00           | 0.72          | ; MEK                         |
| 1427382_a_at       | Suv39h1       | suppressor of variegation 3-9 homolog 1 (Drosophila)                       | -5.44          | 0.00           | 0.50          | BRAF; MEK                     |
| 1424724_a_at       | D16Ert472e    | DNA segment. Chr 16. ERATO Doi 472. expressed                              | -5.44          | 0.00           | 0.47          | ; n.r.                        |
| 1418275_a_at       | Elf2          | E74-like factor 2                                                          | -5.44          | 0.00           | 0.74          | BRAF; MEK                     |
| 1424452_at         | Sltm          | SAFB-like. transcription modulator                                         | -5.44          | 0.00           | 0.72          | ; MEK                         |
| 1435122_x_at       | Dnmt1         | DNA methyltransferase (cytosine-5) 1                                       | -5.44          | 0.00           | 0.30          | BRAF; MEK                     |
| 1442148_at         | Psp1          | PC4 and SFRS1 interacting protein 1                                        | -5.45          | 0.00           | 0.60          | BRAF; MEK                     |
| 1421321_a_at       | Net1          | neuroepithelial cell transforming gene 1                                   | -5.45          | 0.00           | 0.37          | BRAF; MEK                     |
| 1418514_at         | Mtf2          | metal response element binding transcription factor 2                      | -5.45          | 0.00           | 0.61          | BRAF; MEK                     |
| 1426790_at         | Ssrp1         | structure specific recognition protein 1                                   | -5.45          | 0.00           | 0.50          | BRAF; MEK                     |
| 1428892_at         | Ppil1         | peptidylprolyl isomerase (cyclophilin)-like 1                              | -5.45          | 0.00           | 0.56          | BRAF; MEK                     |
| 1456320_at         | D1Ert453e     | DNA segment. Chr 1. ERATO Doi 53. expressed                                | -5.45          | 0.00           | 0.64          | n.r. ;                        |
| 1439463_x_at       | 2810416G20Rik | RIKEN cDNA 2810416G20 gene                                                 | -5.46          | 0.00           | 0.45          | BRAF; MEK                     |
| 1418121_at         | Vrk3          | vaccinia related kinase 3                                                  | -5.46          | 0.00           | 0.77          | BRAF; MEK                     |
| 1427707_a_at       | Stil          | Scf/Tal1 interrupting locus                                                | -5.46          | 0.00           | 0.36          | BRAF; MEK                     |
| 1433408_a_at       | Mcm10         | minichromosome maintenance deficient 10 (S. cerevisiae)                    | -5.46          | 0.00           | 0.30          | BRAF; MEK                     |
| 1436490_x_at       | Ran           | RAN. member RAS oncogene family                                            | -5.46          | 0.00           | 0.89          | BRAF; MEK                     |
| 1436248_at         | NA            | NA                                                                         | -5.46          | 0.00           | 0.63          | n.r. ; n.r.                   |
| 1429491_s_at       | Rif1          | Rap1 interacting factor 1 homolog (yeast)                                  | -5.46          | 0.00           | 0.31          | BRAF; MEK                     |
| 1435254_at         | Plxnb1        | plexin B1                                                                  | -5.46          | 0.00           | 0.45          | BRAF; MEK                     |
| 1453198_at         | Zfp422-rs1    | zinc finger protein 422. related sequence 1                                | -5.47          | 0.00           | 0.59          | n.r. ; MEK                    |
| 1440050_at         | Hbs1l         | Hbs1-like (S. cerevisiae)                                                  | -5.47          | 0.00           | 0.67          | BRAF; MEK                     |
| 1427959_at         | Abhd10        | abhydrolase domain containing 10                                           | -5.47          | 0.00           | 0.52          | BRAF; MEK                     |
| 1450983_at         | Akap8         | A kinase (PRKA) anchor protein 8                                           | -5.47          | 0.00           | 0.48          | BRAF; MEK                     |
| 1460240_a_at       | Hnmpc         | heterogeneous nuclear ribonucleoprotein C                                  | -5.47          | 0.00           | 0.77          | BRAF; MEK                     |
| 1458373_at         | Gen1          | Gen homolog 1. endonuclease (Drosophila)                                   | -5.47          | 0.00           | 0.59          | BRAF; MEK                     |
| 1417647_at         | Snx5          | sorting nexin 5                                                            | -5.48          | 0.00           | 0.73          | BRAF; MEK                     |
| 1436431_at         | 1700025G04Rik | RIKEN cDNA 1700025G04 gene                                                 | -5.48          | 0.00           | 0.51          | BRAF; MEK                     |
| 1428052_a_at       | Zmym1         | zinc finger. MYM domain containing 1                                       | -5.48          | 0.00           | 0.55          | BRAF; MEK                     |
| 1450479_x_at       | Ptpn12        | protein tyrosine phosphatase. non-receptor type 12                         | -5.48          | 0.00           | 0.75          | ; MEK                         |
| 1418971_x_at       | Bcl10         | B-cell leukemia/lymphoma 10                                                | -5.48          | 0.00           | 0.73          |                               |
| 1460538_at         | Cdh10         | cadherin 10                                                                | -5.48          | 0.00           | 0.38          | n.r. ; n.r.                   |
| 1416751_a_at       | Ddx20         | DEAD (Asp-Glu-Ala-Asp) box polypeptide 20                                  | -5.49          | 0.00           | 0.61          | BRAF; MEK                     |
| 1426725_s_at       | Ets1          | E26 avian leukemia oncogene 1. 5' domain                                   | -5.49          | 0.00           | 0.51          | BRAF; MEK                     |
| 1452589_at         | Ptk7          | PTK7 protein tyrosine kinase 7                                             | -5.49          | 0.00           | 0.44          | BRAF; MEK                     |
| 1438179_s_at       | Elp2          | elongation protein 2 homolog (S. cerevisiae)                               | -5.49          | 0.00           | 0.78          | BRAF; MEK                     |
| 1426533_at         | Nol5a         | nucleolar protein 5A                                                       | -5.49          | 0.00           | 0.47          | BRAF; MEK                     |
| 1425349_a_at       | Myef2         | myelin basic protein expression factor 2. repressor                        | -5.50          | 0.00           | 0.47          |                               |
| 1426789_s_at       | Ssrp1         | structure specific recognition protein 1                                   | -5.50          | 0.00           | 0.55          | BRAF; MEK                     |
| 1442465_s_at       | Strbp         | spermatid perinuclear RNA binding protein                                  | -5.50          | 0.00           | 0.61          | ; MEK                         |
| 1420081_s_at       | D2Ert4750e    | DNA segment. Chr 2. ERATO Doi 750. expressed                               | -5.50          | 0.00           | 0.35          | BRAF; MEK                     |
| 1428291_at         | Exosc8        | exosome component 8                                                        | -5.50          | 0.00           | 0.46          | BRAF; MEK                     |
| 1438725_at         | Med13         | mediator complex subunit 13                                                | -5.50          | 0.00           | 0.58          | ; MEK                         |
| 1433575_at         | Sox4          | SRY-box containing gene 4                                                  | -5.51          | 0.00           | 0.56          | BRAF; MEK                     |
| 1417487_at         | Fos1          | fos-like antigen 1                                                         | -5.51          | 0.00           | 0.28          | BRAF; MEK                     |
| 1448134_at         | X99384        | cDNA sequence X99384                                                       | -5.51          | 0.00           | 0.49          | BRAF; MEK                     |
| 1442058_s_at       | Psmc3ip       | proteasome (prosome. macropain) 26S subunit. ATPase 3. interacting protein | -5.52          | 0.00           | 0.34          | BRAF; MEK                     |
| 1452226_at         | Rcc2          | regulator of chromosome condensation 2                                     | -5.52          | 0.00           | 0.43          | BRAF; MEK                     |
| 1433440_x_at       | Uba2          | ubiquitin-like modifier activating enzyme 2                                | -5.52          | 0.00           | 0.64          | BRAF; MEK                     |
| 1419838_s_at       | Plk4          | polo-like kinase 4 (Drosophila)                                            | -5.52          | 0.00           | 0.28          | BRAF; MEK                     |
| 1429109_at         | Msl21         | male-specific lethal 2-like 1 (Drosophila)                                 | -5.53          | 0.00           | 0.62          | BRAF; MEK                     |
| 1418516_at         | Mtf2          | metal response element binding transcription factor 2                      | -5.53          | 0.00           | 0.59          | BRAF; MEK                     |
| 1450173_at         | Ripk2         | receptor (TNFRSF)-interacting serine-threonine kinase 2                    | -5.53          | 0.00           | 0.53          | n.r. ; n.r.                   |

| <b>Probeset ID</b> | <b>Symbol</b> | <b>Gene Name</b>                                                                    | <b>d-value</b> | <b>q-value</b> | <b>R-fold</b> | <b>Expression reversed by</b> |
|--------------------|---------------|-------------------------------------------------------------------------------------|----------------|----------------|---------------|-------------------------------|
| 1416483_at         | Ttc3          | tetratricopeptide repeat domain 3                                                   | -5.53          | 0.00           | 0.54          | ; MEK                         |
| 1429053_at         | 1110012J17Rik | RIKEN cDNA 1110012J17 gene                                                          | -5.53          | 0.00           | 0.52          | BRAF; MEK                     |
| 1416544_at         | Ezh2          | enhancer of zeste homolog 2 (Drosophila)                                            | -5.53          | 0.00           | 0.29          | BRAF; MEK                     |
| 1434695_at         | Dtl           | denticleless homolog (Drosophila)                                                   | -5.53          | 0.00           | 0.25          | BRAF; MEK                     |
| 1435597_at         | Atad5         | ATPase family, AAA domain containing 5                                              | -5.53          | 0.00           | 0.29          | BRAF; MEK                     |
| 1455495_at         | Abl2          | v-abl Abelson murine leukemia viral oncogene homolog 2 (arg. Abelson-related gene)  | -5.53          | 0.00           | 0.53          | BRAF; MEK                     |
| 1438852_x_at       | Mcm6          | minichromosome maintenance deficient 6 (MIS5 homolog, S. pombe) (S. cerevisiae)     | -5.54          | 0.00           | 0.20          | BRAF; MEK                     |
| 1455983_at         | Cdca2         | cell division cycle associated 2                                                    | -5.54          | 0.00           | 0.42          | BRAF; MEK                     |
| 1416641_at         | Lig1          | ligase I, DNA, ATP-dependent                                                        | -5.54          | 0.00           | 0.31          | BRAF; MEK                     |
| 1428328_at         | Nup50         | nucleoporin 50                                                                      | -5.54          | 0.00           | 0.70          | BRAF; MEK                     |
| 1455228_at         | Whsc1         | Wolf-Hirschhorn syndrome candidate 1 (human)                                        | -5.54          | 0.00           | 0.58          | BRAF; MEK                     |
| 1427094_at         | Pole2         | polymerase (DNA directed), epsilon 2 (p59 subunit)                                  | -5.54          | 0.00           | 0.26          | BRAF; MEK                     |
| 1452266_at         | Las1l         | LAS1-like (S. cerevisiae)                                                           | -5.54          | 0.00           | 0.60          | BRAF; MEK                     |
| 1438861_at         | Bnc2          | basonuclin 2                                                                        | -5.54          | 0.00           | 0.38          | BRAF; MEK                     |
| 1426441_at         | Slc11a2       | solute carrier family 11 (proton-coupled divalent metal ion transporters), member 2 | -5.55          | 0.00           | 0.68          | BRAF; MEK                     |
| 1450307_x_at       | H2afy3        | H2A histone family, member Y3                                                       | -5.55          | 0.00           | 0.79          | BRAF; MEK                     |
| 1419592_at         | Unc5c         | unc-5 homolog C (C. elegans)                                                        | -5.55          | 0.00           | 0.26          |                               |
| 1452422_a_at       | Snrpb2        | U2 small nuclear ribonucleoprotein B                                                | -5.55          | 0.00           | 0.64          | BRAF; MEK                     |
| 1425178_s_at       | Shmt1         | serine hydroxymethyltransferase 1 (soluble)                                         | -5.55          | 0.00           | 0.67          | BRAF; MEK                     |
| 1417587_at         | Timeless      | timeless homolog (Drosophila)                                                       | -5.55          | 0.00           | 0.32          | BRAF; MEK                     |
| 1428409_at         | Nat13         | N-acetyltransferase 13                                                              | -5.56          | 0.00           | 0.65          |                               |
| 1445684_s_at       | Hdac2         | histone deacetylase 2                                                               | -5.56          | 0.00           | 0.59          | BRAF; MEK                     |
| 1422535_at         | Ccne2         | cyclin E2                                                                           | -5.56          | 0.00           | 0.31          | BRAF; MEK                     |
| 1421236_at         | Ripk2         | receptor (TNFRSF)-interacting serine-threonine kinase 2                             | -5.56          | 0.00           | 0.57          | n.r. ;                        |
| 1428452_at         | 2810025M15Rik | RIKEN cDNA 2810025M15 gene                                                          | -5.56          | 0.00           | 0.49          | BRAF                          |
| 1448777_at         | Mcm2          | minichromosome maintenance deficient 2 mitotin (S. cerevisiae)                      | -5.56          | 0.00           | 0.29          | BRAF; MEK                     |
| 1426817_at         | Mki67         | antigen identified by monoclonal antibody Ki 67                                     | -5.56          | 0.00           | 0.20          | BRAF; MEK                     |
| 1451436_at         | Sbno1         | sno. strawberry notch homolog 1 (Drosophila)                                        | -5.56          | 0.00           | 0.59          | ; MEK                         |
| 1456377_x_at       | Limd2         | LIM domain containing 2                                                             | -5.56          | 0.00           | 0.42          | BRAF; MEK                     |
| 1435743_at         | Klh23         | kelch-like 23 (Drosophila)                                                          | -5.57          | 0.00           | 0.40          | BRAF; MEK                     |
| 1448369_at         | Pola2         | polymerase (DNA directed), alpha 2                                                  | -5.57          | 0.00           | 0.53          | BRAF; MEK                     |
| 1458140_at         | Slit2         | slit homolog 2 (Drosophila)                                                         | -5.57          | 0.00           | 0.46          | ; MEK                         |
| 1449965_at         | Mcpt8         | mast cell protease 8                                                                | -5.57          | 0.00           | 0.16          | BRAF                          |
| 1420093_s_at       | Hnrpdl        | heterogeneous nuclear ribonucleoprotein D-like                                      | -5.57          | 0.00           | 0.62          | BRAF; MEK                     |
| 1436345_at         | 5730559C18Rik | RIKEN cDNA 5730559C18 gene                                                          | -5.57          | 0.00           | 0.26          | BRAF; MEK                     |
| 1428029_a_at       | H2afv         | H2A histone family, member V                                                        | -5.58          | 0.00           | 0.60          | BRAF; MEK                     |
| 1416303_at         | Litaf         | LPS-induced TN factor                                                               | -5.58          | 0.00           | 0.55          | BRAF; MEK                     |
| 1438750_at         | Atrx          | alpha thalassemia/mental retardation syndrome X-linked homolog (human)              | -5.58          | 0.00           | 0.56          | ; MEK                         |
| 1424321_at         | Rfc4          | replication factor C (activator 1) 4                                                | -5.58          | 0.00           | 0.40          | BRAF; MEK                     |
| 1452073_at         | 6720460F02Rik | RIKEN cDNA 6720460F02 gene                                                          | -5.58          | 0.00           | 0.33          | BRAF; MEK                     |
| 1430617_at         | Oip5          | Opa interacting protein 5                                                           | -5.58          | 0.00           | 0.38          | BRAF; MEK                     |
| 1423382_a_at       | Hnrpof        | heterogeneous nuclear ribonucleoprotein F                                           | -5.58          | 0.00           | 0.57          | BRAF                          |
| 1427282_a_at       | Fxn           | frataxin                                                                            | -5.58          | 0.00           | 0.53          | BRAF; MEK                     |
| 1424390_at         | Nup1l         | nucleoporin like 1                                                                  | -5.58          | 0.00           | 0.70          |                               |
| 1418966_a_at       | Dcbl1         | discoidin, CUB and LCCL domain containing 1                                         | -5.58          | 0.00           | 0.53          | ; n.r.                        |
| 1417948_s_at       | Ilf2          | interleukin enhancer binding factor 2                                               | -5.59          | 0.00           | 0.63          | BRAF; MEK                     |
| 1436511_at         | BC031781      | cDNA sequence BC031781                                                              | -5.59          | 0.00           | 0.81          | ; n.r.                        |
| 1426825_at         | Fmnl3         | formin-like 3                                                                       | -5.59          | 0.00           | 0.65          | BRAF; MEK                     |
| 1426402_at         | Syncrip       | synaptotagmin binding, cytoplasmic RNA interacting protein                          | -5.59          | 0.00           | 0.65          | BRAF; MEK                     |
| 1449877_s_at       | LOC100044746  | similar to Kifc1 protein                                                            | -5.59          | 0.00           | 0.47          | BRAF; MEK                     |
| 1431089_at         | Cpsf2         | cleavage and polyadenylation specific factor 2                                      | -5.60          | 0.00           | 0.48          | BRAF; MEK                     |
| 1435004_at         | Pank4         | pantothenate kinase 4                                                               | -5.60          | 0.00           | 0.69          | BRAF; MEK                     |
| 1426411_a_at       | Strbp         | spermatid perinuclear RNA binding protein                                           | -5.61          | 0.00           | 0.53          | n.r. ; n.r.                   |

| <b>Probeset ID</b> | <b>Symbol</b> | <b>Gene Name</b>                                                                            | <b>d-value</b> | <b>q-value</b> | <b>R-fold</b> | <b>Expression reversed by</b> |
|--------------------|---------------|---------------------------------------------------------------------------------------------|----------------|----------------|---------------|-------------------------------|
| 1437409_s_at       | Gpr126        | G protein-coupled receptor 126                                                              | -5.61          | 0.00           | 0.47          | BRAF; MEK                     |
| 1447275_at         | Bbs12         | Bardet-Biedl syndrome 12 (human)                                                            | -5.61          | 0.00           | 0.52          | BRAF; MEK                     |
| 1426751_s_at       | Nup107        | nucleoporin 107                                                                             | -5.61          | 0.00           | 0.53          | BRAF; MEK                     |
| 1430019_a_at       | Hnmpa1        | heterogeneous nuclear ribonucleoprotein A1                                                  | -5.61          | 0.00           | 0.43          | BRAF; MEK                     |
| 1420110_s_at       | Zfp334        | zinc finger protein 334                                                                     | -5.61          | 0.00           | 0.71          | BRAF; MEK                     |
| 1428458_at         | Pop1          | processing of precursor 1. ribonuclease P/MRP family. (S. cerevisiae)                       | -5.61          | 0.00           | 0.53          | BRAF; MEK                     |
| 1417696_at         | Soat1         | sterol O-acyltransferase 1                                                                  | -5.61          | 0.00           | 0.61          | ; MEK                         |
| 1420979_at         | Pak1          | p21 (CDKN1A)-activated kinase 1                                                             | -5.61          | 0.00           | 0.42          | BRAF; MEK                     |
| 1455430_at         | Prr8          | proline rich 8                                                                              | -5.62          | 0.00           | 0.73          | BRAF; MEK                     |
| 1437370_at         | Sgol2         | shugoshin-like 2 (S. pombe)                                                                 | -5.62          | 0.00           | 0.28          | BRAF; MEK                     |
| 1421939_a_at       | Stag1         | stromal antigen 1                                                                           | -5.62          | 0.00           | 0.65          | BRAF; MEK                     |
| 1428099_a_at       | Sfrs1         | splicing factor. arginine/serine-rich 1 (ASF/SF2)                                           | -5.62          | 0.00           | 0.54          | BRAF; MEK                     |
| 1436874_x_at       | Slc25a5       | solute carrier family 25 (mitochondrial carrier. adenine nucleotide translocator). member 5 | -5.62          | 0.00           | 0.70          | BRAF; MEK                     |
| 1435880_at         | Ankrd50       | ankrin repeat domain 50                                                                     | -5.62          | 0.00           | 0.52          | ; MEK                         |
| 1428527_at         | Snx7          | sorting nexin 7                                                                             | -5.62          | 0.00           | 0.71          | n.r. ; n.r.                   |
| 1424873_at         | Rnf2          | ring finger protein 2                                                                       | -5.62          | 0.00           | 0.71          | ; MEK                         |
| 1428694_at         | 5033413D16Rik | RIKEN cDNA 5033413D16 gene                                                                  | -5.63          | 0.00           | 0.30          | BRAF; MEK                     |
| 1428537_at         | Csnk1a1       | casein kinase 1. alpha 1                                                                    | -5.63          | 0.00           | 0.74          | ; MEK                         |
| 1416071_at         | Ddx18         | DEAD (Asp-Glu-Ala-Asp) box polypeptide 18                                                   | -5.63          | 0.00           | 0.71          | BRAF; MEK                     |
| 1417457_at         | Cks2          | CDC28 protein kinase regulatory subunit 2                                                   | -5.63          | 0.00           | 0.47          | BRAF; MEK                     |
| 1437404_at         | Mast4         | microtubule associated serine/threonine kinase family member 4                              | -5.64          | 0.00           | 0.28          | BRAF; MEK                     |
| 1434365_a_at       | BC055324      | cDNA sequence BC055324                                                                      | -5.64          | 0.00           | 0.35          | BRAF; MEK                     |
| 1455398_at         | Lrrc8c        | leucine rich repeat containing 8 family. member C                                           | -5.64          | 0.00           | 0.51          | BRAF                          |
| 1434317_s_at       | Tex10         | testis expressed gene 10                                                                    | -5.64          | 0.00           | 0.65          | BRAF; MEK                     |
| 1459987_s_at       | Cct3          | chaperonin containing Tcp1. subunit 3 (gamma)                                               | -5.65          | 0.00           | 0.74          | BRAF; MEK                     |
| 1424882_a_at       | Nt5dc2        | 5'-nucleotidase domain containing 2                                                         | -5.65          | 0.00           | 0.41          | BRAF; MEK                     |
| 1435742_at         | Smek1         | SMEK homolog 1. suppressor of mek1 (Dictyostelium)                                          | -5.66          | 0.00           | 0.61          | BRAF; MEK                     |
| 1450861_at         | Fancc         | Fanconi anemia. complementation group C                                                     | -5.66          | 0.00           | 0.66          | BRAF                          |
| 1424060_at         | Neil3         | nei like 3 (E. coli)                                                                        | -5.66          | 0.00           | 0.64          | BRAF; MEK                     |
| 1453010_at         | Iws1          | IWS1 homolog (S. cerevisiae)                                                                | -5.66          | 0.00           | 0.61          | BRAF; MEK                     |
| 1456077_x_at       | Cdc25c        | cell division cycle 25 homolog C (S. pombe)                                                 | -5.66          | 0.00           | 0.41          | BRAF; MEK                     |
| 1426612_at         | Tipin         | timeless interacting protein                                                                | -5.66          | 0.00           | 0.49          | BRAF; MEK                     |
| 1428844_a_at       | Bclaf1        | BCL2-associated transcription factor 1                                                      | -5.66          | 0.00           | 0.53          | ; MEK                         |
| 1437199_at         | Dusp5         | dual specificity phosphatase 5                                                              | -5.66          | 0.00           | 0.21          | BRAF; MEK                     |
| 1423735_a_at       | Wdr36         | WD repeat domain 36                                                                         | -5.66          | 0.00           | 0.61          | BRAF; MEK                     |
| 1451986_s_at       | Lrrk1         | leucine-rich repeat kinase 1                                                                | -5.67          | 0.00           | 0.71          | BRAF                          |
| 1434495_at         | Patz1         | POZ (BTB) and AT hook containing zinc finger 1                                              | -5.67          | 0.00           | 0.49          | BRAF; MEK                     |
| 1429658_a_at       | Smc2          | structural maintenance of chromosomes 2                                                     | -5.67          | 0.00           | 0.33          | BRAF; MEK                     |
| 1450842_a_at       | Cenpa         | centromere protein A                                                                        | -5.67          | 0.00           | 0.31          | BRAF; MEK                     |
| 1437385_at         | Ccbe1         | collagen and calcium binding EGF domains 1                                                  | -5.67          | 0.00           | 0.29          | ; MEK                         |
| 1424397_at         | Dhx36         | DEAH (Asp-Glu-Ala-His) box polypeptide 36                                                   | -5.67          | 0.00           | 0.76          | n.r. ;                        |
| 1428281_at         | Trub1         | TruB pseudouridine (psi) synthase homolog 1 (E. coli)                                       | -5.67          | 0.00           | 0.71          | BRAF; MEK                     |
| 1437655_at         | D430020J02Rik | RIKEN cDNA D430020J02 gene                                                                  | -5.68          | 0.00           | 0.51          | BRAF; MEK                     |
| 1436910_at         | Rasal2        | RAS protein activator like 2                                                                | -5.68          | 0.00           | 0.59          | n.r. ; n.r.                   |
| 1455523_at         | Cstf2         | cleavage stimulation factor. 3' pre-RNA subunit 2                                           | -5.69          | 0.00           | 0.64          | BRAF; MEK                     |
| 1418377_a_at       | Siva1         | SIVA1. apoptosis-inducing factor                                                            | -5.69          | 0.00           | 0.54          | BRAF                          |
| 1450157_a_at       | Hmmr          | hyaluronan mediated motility receptor (RHAMM)                                               | -5.69          | 0.00           | 0.28          | BRAF; MEK                     |
| 1452305_s_at       | Cenpn         | centromere protein N                                                                        | -5.70          | 0.00           | 0.39          | BRAF; MEK                     |
| 1422198_a_at       | Shmt1         | serine hydroxymethyltransferase 1 (soluble)                                                 | -5.70          | 0.00           | 0.42          | BRAF; MEK                     |
| 1453683_a_at       | Cep55         | centrosomal protein 55                                                                      | -5.70          | 0.00           | 0.26          | ; n.r.                        |
| 1454783_at         | Il13ra1       | interleukin 13 receptor. alpha 1                                                            | -5.70          | 0.00           | 0.34          | BRAF; MEK                     |
| 1417582_s_at       | Dhodh         | dihydroorotate dehydrogenase                                                                | -5.71          | 0.00           | 0.61          | BRAF                          |
| 1424489_a_at       | Trit1         | tRNA isopentenyltransferase 1                                                               | -5.71          | 0.00           | 0.73          | ; MEK                         |
| 1421140_a_at       | Foxp1         | forkhead box P1                                                                             | -5.71          | 0.00           | 0.64          | n.r. ;                        |
| 1437239_x_at       | Phc2          | polyhomeotic-like 2 (Drosophila)                                                            | -5.72          | 0.00           | 0.55          | BRAF; MEK                     |

| <b>Probeset ID</b> | <b>Symbol</b>     | <b>Gene Name</b>                                                    | <b>d-value</b> | <b>q-value</b> | <b>R-fold</b> | <b>Expression reversed by</b> |
|--------------------|-------------------|---------------------------------------------------------------------|----------------|----------------|---------------|-------------------------------|
| 1424291_at         | Nup93             | nucleoporin 93                                                      | -5.72          | 0.00           | 0.68          | BRAF; MEK                     |
| 1459651_s_at       | OTTMUSG0000026223 | predicted gene. OTTMUSG00000026223                                  | -5.72          | 0.00           | 0.68          | BRAF; MEK                     |
| 1450082_s_at       | Etv5              | ets variant gene 5                                                  | -5.72          | 0.00           | 0.49          | BRAF; MEK                     |
| 1421207_at         | Lif               | leukemia inhibitory factor                                          | -5.72          | 0.00           | 0.50          | BRAF; MEK                     |
| 1454736_at         | Ankrd57           | ankyrin repeat domain 57                                            | -5.72          | 0.00           | 0.67          | BRAF; MEK                     |
| 1420907_at         | Cd2ap             | CD2-associated protein                                              | -5.72          | 0.00           | 0.64          | ; MEK                         |
| 1455355_at         | 6030408C04Rik     | RIKEN cDNA 6030408C04 gene                                          | -5.72          | 0.00           | 0.36          | BRAF; MEK                     |
| 1427147_at         | F730047E07Rik     | RIKEN cDNA F730047E07 gene                                          | -5.73          | 0.00           | 0.41          | BRAF; MEK                     |
| 1420877_at         | Sept6             | septin 6                                                            | -5.73          | 0.00           | 0.65          | BRAF; MEK                     |
| 1424440_at         | Mrps6             | mitochondrial ribosomal protein S6                                  | -5.73          | 0.00           | 0.43          | BRAF; MEK                     |
| 1416135_at         | Apex1             | apurinic/aprimidinic endonuclease 1                                 | -5.74          | 0.00           | 0.65          | BRAF; MEK                     |
| 1459211_at         | Gli2              | GLI-Kruppel family member GLI2                                      | -5.74          | 0.00           | 0.28          | BRAF; MEK                     |
| 1450938_at         | Pnn               | pinin                                                               | -5.74          | 0.00           | 0.64          | BRAF; MEK                     |
| 1426676_s_at       | Tomm70a           | translocase of outer mitochondrial membrane 70 homolog A (yeast)    | -5.74          | 0.00           | 0.64          | BRAF; MEK                     |
| 1416757_at         | Zwilch            | Zwilch. kinetochore associated. homolog (Drosophila)                | -5.75          | 0.00           | 0.33          | BRAF; MEK                     |
| 1428911_at         | Tll4              | tubulin tyrosine ligase-like family. member 4                       | -5.75          | 0.00           | 0.41          | BRAF; MEK                     |
| 1426827_at         | Ythdc1            | YTH domain containing 1                                             | -5.75          | 0.00           | 0.64          | BRAF; MEK                     |
| 1425126_at         | Ncam1             | neural cell adhesion molecule 1                                     | -5.76          | 0.00           | 0.39          | ; MEK                         |
| 1456227_x_at       | Rbbp7             | retinoblastoma binding protein 7                                    | -5.76          | 0.00           | 0.65          | BRAF; MEK                     |
| 1429043_at         | Smndc1            | survival motor neuron domain containing 1                           | -5.76          | 0.00           | 0.71          | BRAF; MEK                     |
| 1451087_at         | Wdr36             | WD repeat domain 36                                                 | -5.77          | 0.00           | 0.64          | BRAF; MEK                     |
| 1450405_at         | Mrpl19            | mitochondrial ribosomal protein L19                                 | -5.77          | 0.00           | 0.65          | BRAF                          |
| 1448519_at         | Tead2             | TEA domain family member 2                                          | -5.77          | 0.00           | 0.40          | BRAF; MEK                     |
| 1452045_at         | Zfp281            | zinc finger protein 281                                             | -5.77          | 0.00           | 0.62          | n.r. ; MEK                    |
| 1428213_at         | Nsmce4a           | non-SMC element 4 homolog A (S. cerevisiae)                         | -5.78          | 0.00           | 0.62          | BRAF; MEK                     |
| 1423318_at         | Rad18             | RAD18 homolog (S. cerevisiae)                                       | -5.78          | 0.00           | 0.39          | BRAF; MEK                     |
| 1426675_at         | Tomm70a           | translocase of outer mitochondrial membrane 70 homolog A (yeast)    | -5.78          | 0.00           | 0.67          | BRAF; MEK                     |
| 1438009_at         | Hist1h2ae         | histone cluster 1. H2ae                                             | -5.78          | 0.00           | 0.27          | BRAF; MEK                     |
| 1424659_at         | Slit2             | slit homolog 2 (Drosophila)                                         | -5.79          | 0.00           | 0.27          | BRAF; MEK                     |
| 1422946_a_at       | Dnmt1             | DNA methyltransferase (cytosine-5) 1                                | -5.79          | 0.00           | 0.30          | BRAF; MEK                     |
| 1430291_at         | Dock5             | dedicator of cytokinesis 5                                          | -5.79          | 0.00           | 0.36          | BRAF; MEK                     |
| 1459470_at         | NA                | NA                                                                  | -5.80          | 0.00           | 0.75          | BRAF; MEK                     |
| 1416915_at         | Msh6              | mutS homolog 6 (E. coli)                                            | -5.80          | 0.00           | 0.28          | BRAF; MEK                     |
| 1423775_s_at       | Prc1              | protein regulator of cytokinesis 1                                  | -5.81          | 0.00           | 0.30          | BRAF; MEK                     |
| 1434972_x_at       | Sfrs1             | splicing factor. arginine/serine-rich 1 (ASF/SF2)                   | -5.81          | 0.00           | 0.58          | BRAF; MEK                     |
| 1424682_at         | Gpn3              | GPN-loop GTPase 3                                                   | -5.81          | 0.00           | 0.68          | BRAF; MEK                     |
| 1434190_at         | Sms               | spermine synthase                                                   | -5.81          | 0.00           | 0.57          | BRAF; MEK                     |
| 1449705_x_at       | Mcm3              | minichromosome maintenance deficient 3 (S. cerevisiae)              | -5.82          | 0.00           | 0.33          | BRAF; MEK                     |
| 1422045_a_at       | Ptpn12            | protein tyrosine phosphatase. non-receptor type 12                  | -5.82          | 0.00           | 0.69          | ; MEK                         |
| 1422462_at         | Ube2t             | ubiquitin-conjugating enzyme E2T (putative)                         | -5.82          | 0.00           | 0.37          | BRAF; MEK                     |
| 1416868_at         | Cdkn2c            | cyclin-dependent kinase inhibitor 2C (p18. inhibits CDK4)           | -5.82          | 0.00           | 0.56          | BRAF; MEK                     |
| 1424629_at         | Brca1             | breast cancer 1                                                     | -5.82          | 0.00           | 0.22          | BRAF; MEK                     |
| 1417681_at         | Nudt21            | nudix (nucleoside diphosphate linked moiety X)-type motif 21        | -5.82          | 0.00           | 0.64          | BRAF; MEK                     |
| 1452499_a_at       | Kif2a             | kinesin family member 2A                                            | -5.83          | 0.00           | 0.65          | BRAF; MEK                     |
| 1426774_at         | Parp12            | poly (ADP-ribose) polymerase family. member 12                      | -5.83          | 0.00           | 0.66          | n.r. ; MEK                    |
| 1424967_x_at       | Tnnt2             | troponin T2. cardiac                                                | -5.83          | 0.00           | 0.18          | BRAF; MEK                     |
| 1422252_a_at       | Cdc25c            | cell division cycle 25 homolog C (S. pombe)                         | -5.83          | 0.00           | 0.52          | BRAF; MEK                     |
| 1443524_x_at       | Bcl10             | B-cell leukemia/lymphoma 10                                         | -5.83          | 0.00           | 0.76          |                               |
| 1426836_s_at       | Metap1            | methionyl aminopeptidase 1                                          | -5.83          | 0.00           | 0.73          | BRAF; MEK                     |
| 1440299_at         | E330016A19Rik     | RIKEN cDNA E330016A19 gene                                          | -5.83          | 0.00           | 0.54          | BRAF; MEK                     |
| 1431087_at         | Spc24             | SPC24. NDC80 kinetochore complex component. homolog (S. cerevisiae) | -5.83          | 0.00           | 0.32          | BRAF; MEK                     |
| 1416120_at         | Rrm2              | ribonucleotide reductase M2                                         | -5.84          | 0.00           | 0.28          | BRAF                          |
| 1429268_at         | 2610318N02Rik     | RIKEN cDNA 2610318N02 gene                                          | -5.84          | 0.00           | 0.50          | BRAF; MEK                     |
| 1426630_at         | Exosc2            | exosome component 2                                                 | -5.84          | 0.00           | 0.62          | BRAF; MEK                     |
| 1426477_at         | Rasa1             | RAS p21 protein activator 1                                         | -5.84          | 0.00           | 0.56          |                               |



| Probeset ID  | Symbol             | Gene Name                                                                                         | d-value | q-value | R-fold | Expression reversed by |
|--------------|--------------------|---------------------------------------------------------------------------------------------------|---------|---------|--------|------------------------|
| 1437658_a_at | Snord22            | small nucleolar RNA. C/D box 22                                                                   | -5.84   | 0.00    | 0.41   | ; MEK                  |
| 1421529_a_at | Txnrd1             | thioredoxin reductase 1                                                                           | -5.84   | 0.00    | 0.63   | BRAF; MEK              |
| 1445882_at   | Cd300lb            | CD300 antigen like family member B                                                                | -5.85   | 0.00    | 0.66   | BRAF; MEK              |
| 1423577_at   | Ankrd32            | ankyrin repeat domain 32                                                                          | -5.85   | 0.00    | 0.51   | BRAF                   |
| 1434949_at   | Armc8              | armadillo repeat containing 8                                                                     | -5.85   | 0.00    | 0.55   | BRAF; MEK              |
| 1450070_s_at | Pak1               | p21 (CDKN1A)-activated kinase 1                                                                   | -5.86   | 0.00    | 0.46   | BRAF; MEK              |
| 1423349_at   | Socs5              | suppressor of cytokine signaling 5                                                                | -5.86   | 0.00    | 0.60   | BRAF; MEK              |
| 1423795_at   | Sfpq               | splicing factor proline/glutamine rich (polypyrimidine tract binding protein associated)          | -5.86   | 0.00    | 0.55   | BRAF; MEK              |
| 1453183_at   | 1110034A24Rik      | RIKEN cDNA 1110034A24 gene                                                                        | -5.86   | 0.00    | 0.49   | BRAF; MEK              |
| 1417125_at   | Ahcy               | S-adenosylhomocysteine hydrolase                                                                  | -5.86   | 0.00    | 0.55   | BRAF; MEK              |
| 1448627_s_at | Pbk                | PDZ binding kinase                                                                                | -5.86   | 0.00    | 0.28   | BRAF; MEK              |
| 1450052_at   | Kif2a              | kinesin family member 2A                                                                          | -5.86   | 0.00    | 0.56   | BRAF; MEK              |
| 1418084_at   | Nrp1               | neuropilin 1                                                                                      | -5.86   | 0.00    | 0.29   | BRAF; MEK              |
| 1429106_at   | 4921509J17Rik      | RIKEN cDNA 4921509J17 gene                                                                        | -5.87   | 0.00    | 0.37   | BRAF; MEK              |
| 1422513_at   | Ccnf               | cyclin F                                                                                          | -5.87   | 0.00    | 0.26   | BRAF; MEK              |
| 1453342_at   | Cdc40              | cell division cycle 40 homolog (yeast)                                                            | -5.87   | 0.00    | 0.72   | BRAF; MEK              |
| 1454744_at   | F630043A04Rik      | RIKEN cDNA F630043A04 gene                                                                        | -5.88   | 0.00    | 0.39   | BRAF; MEK              |
| 1415698_at   | Golm1              | golgi membrane protein 1                                                                          | -5.88   | 0.00    | 0.49   | BRAF; MEK              |
| 1437611_x_at | Kif2c              | kinesin family member 2C                                                                          | -5.88   | 0.00    | 0.29   | BRAF; MEK              |
| 1457687_at   | Bcl2               | B-cell leukemia/lymphoma 2                                                                        | -5.89   | 0.00    | 0.50   | BRAF; MEK              |
| 1455852_at   | Nsl1               | NSL1. MIND kinetochore complex component. homolog (S. cerevisiae)                                 | -5.89   | 0.00    | 0.49   | BRAF; MEK              |
| 1459861_s_at | OTTMUSG00000006609 | predicted gene. OTTMUSG00000006609                                                                | -5.90   | 0.00    | 0.59   | BRAF; MEK              |
| 1428410_at   | Nat13              | N-acetyltransferase 13                                                                            | -5.90   | 0.00    | 0.66   | n.r. ; MEK             |
| 1451417_at   | Brca1              | breast cancer 1                                                                                   | -5.90   | 0.00    | 0.38   | BRAF; MEK              |
| 1416076_at   | Ccnb1-rs1          | cyclin B1. related sequence 1                                                                     | -5.90   | 0.00    | 0.24   | BRAF; MEK              |
| 1423543_at   | Swap70             | SWA-70 protein                                                                                    | -5.90   | 0.00    | 0.59   | n.r. ; n.r.            |
| 1448899_s_at | Rad51ap1           | RAD51 associated protein 1                                                                        | -5.91   | 0.00    | 0.30   | BRAF; MEK              |
| 1426349_s_at | Tmpo               | thymopoietin                                                                                      | -5.91   | 0.00    | 0.32   | BRAF; MEK              |
| 1448870_at   | Ltbp1              | latent transforming growth factor beta binding protein 1                                          | -5.91   | 0.00    | 0.40   | BRAF; MEK              |
| 1436922_at   | Ppil5              | peptidylprolyl isomerase (cyclophilin) like 5                                                     | -5.91   | 0.00    | 0.45   | BRAF; MEK              |
| 1455832_a_at | Umps               | uridine monophosphate synthetase                                                                  | -5.91   | 0.00    | 0.54   | BRAF; MEK              |
| 1423416_at   | Smarcc1            | SWI/SNF related. matrix associated. actin dependent regulator of chromatin. subfamily c. member 1 | -5.92   | 0.00    | 0.52   | BRAF; MEK              |
| 1430193_at   | Casc5              | cancer susceptibility candidate 5                                                                 | -5.92   | 0.00    | 0.42   | BRAF; MEK              |
| 1442289_at   | Josd3              | Josephin domain containing 3                                                                      | -5.92   | 0.00    | 0.41   | BRAF; MEK              |
| 1415811_at   | Uhrf1              | ubiquitin-like. containing PHD and RING finger domains. 1                                         | -5.92   | 0.00    | 0.23   | BRAF; MEK              |
| 1449207_a_at | Kif20a             | kinesin family member 20A                                                                         | -5.92   | 0.00    | 0.26   | BRAF; MEK              |
| 1416336_s_at | Snrpd1             | small nuclear ribonucleoprotein D1                                                                | -5.92   | 0.00    | 0.55   | BRAF; MEK              |
| 1437033_a_at | Skp2               | S-phase kinase-associated protein 2 (p45)                                                         | -5.92   | 0.00    | 0.37   | BRAF; MEK              |
| 1423754_at   | Ifitm3             | interferon induced transmembrane protein 3                                                        | -5.92   | 0.00    | 0.38   | ; MEK                  |
| 1455818_at   | 4930427A07Rik      | RIKEN cDNA 4930427A07 gene                                                                        | -5.92   | 0.00    | 0.53   | BRAF; MEK              |
| 1417911_at   | Ccna2              | cyclin A2                                                                                         | -5.93   | 0.00    | 0.25   | BRAF; MEK              |
| 1452040_a_at | Cdca3              | cell division cycle associated 3                                                                  | -5.93   | 0.00    | 0.31   | BRAF; MEK              |
| 1449348_at   | Mpp6               | membrane protein. palmitoylated 6 (MAGUK p55 subfamily member 6)                                  | -5.94   | 0.00    | 0.34   | BRAF; MEK              |
| 1453581_at   | Cep170             | centrosomal protein 170                                                                           | -5.95   | 0.00    | 0.62   | ; MEK                  |
| 1416052_at   | Prps1              | phosphoribosyl pyrophosphate synthetase 1                                                         | -5.95   | 0.00    | 0.61   | BRAF; MEK              |
| 1423722_at   | Tmem49             | transmembrane protein 49                                                                          | -5.95   | 0.00    | 0.71   | ; MEK                  |
| 1436308_at   | Zfp292             | zinc finger protein 292                                                                           | -5.96   | 0.00    | 0.52   | ; MEK                  |
| 1425092_at   | Cdh10              | cadherin 10                                                                                       | -5.96   | 0.00    | 0.27   | n.r. ; n.r.            |
| 1436382_at   | Zbtb12             | zinc finger and BTB domain containing 12                                                          | -5.96   | 0.00    | 0.58   | BRAF; MEK              |
| 1437580_s_at | Nek2               | NIMA (never in mitosis gene a)-related expressed kinase 2                                         | -5.96   | 0.00    | 0.31   | BRAF; MEK              |
| 1433862_at   | Espl1              | extra spindle poles-like 1 (S. cerevisiae)                                                        | -5.96   | 0.00    | 0.25   | BRAF; MEK              |
| 1449101_at   | Ebf2               | early B-cell factor 2                                                                             | -5.97   | 0.00    | 0.79   | ; MEK                  |
| 1422547_at   | Ranbp1             | RAN binding protein 1                                                                             | -5.97   | 0.00    | 0.59   | BRAF; MEK              |
| 1420998_at   | Etv5               | ets variant gene 5                                                                                | -5.97   | 0.00    | 0.47   | BRAF                   |



| <b>Probeset ID</b> | <b>Symbol</b> | <b>Gene Name</b>                                                                         | <b>d-value</b> | <b>q-value</b> | <b>R-fold</b> | <b>Expression reversed by</b> |
|--------------------|---------------|------------------------------------------------------------------------------------------|----------------|----------------|---------------|-------------------------------|
| 1428090_at         | Ptcd3         | pentatricopeptide repeat domain 3                                                        | -5.97          | 0.00           | 0.60          | BRAF; MEK                     |
| 1426410_at         | Pdk3          | pyruvate dehydrogenase kinase, isoenzyme 3                                               | -5.98          | 0.00           | 0.66          | ; MEK                         |
| 1418397_at         | Zfp275        | zinc finger protein 275                                                                  | -5.98          | 0.00           | 0.76          | BRAF; MEK                     |
| 1417559_at         | Sfxn1         | sideroflexin 1                                                                           | -5.98          | 0.00           | 0.67          | BRAF; MEK                     |
| 1422979_at         | Suv39h2       | suppressor of variegation 3-9 homolog 2 (Drosophila)                                     | -5.99          | 0.00           | 0.33          | BRAF; MEK                     |
| 1417913_at         | Gins4         | GINS complex subunit 4 (Sld5 homolog)                                                    | -5.99          | 0.00           | 0.62          | BRAF; MEK                     |
| 1415872_at         | Hnmp1         | heterogeneous nuclear ribonucleoprotein H1                                               | -5.99          | 0.00           | 0.55          | n.r. ; MEK                    |
| 1418970_a_at       | Bcl10         | B-cell leukemia/lymphoma 10                                                              | -5.99          | 0.00           | 0.68          |                               |
| 1434424_at         | Flvcr1        | feline leukemia virus subgroup C cellular receptor 1                                     | -5.99          | 0.00           | 0.51          | BRAF; MEK                     |
| 1433507_a_at       | LOC100039489  | similar to Hmgn2 protein                                                                 | -5.99          | 0.00           | 0.58          | BRAF; MEK                     |
| 1426002_a_at       | Cdc7          | cell division cycle 7 (S. cerevisiae)                                                    | -5.99          | 0.00           | 0.28          | BRAF; MEK                     |
| 1433903_at         | AU021838      | expressed sequence AU021838                                                              | -6.00          | 0.00           | 0.51          | BRAF; MEK                     |
| 1454625_at         | Phf6          | PHD finger protein 6                                                                     | -6.00          | 0.00           | 0.51          | BRAF; MEK                     |
| 1423051_at         | Hnmpu         | heterogeneous nuclear ribonucleoprotein U                                                | -6.00          | 0.00           | 0.52          | BRAF; MEK                     |
| 1452458_s_at       | Ppil5         | peptidylprolyl isomerase (cyclophilin) like 5                                            | -6.01          | 0.00           | 0.27          | BRAF; MEK                     |
| 1415813_at         | Api5          | apoptosis inhibitor 5                                                                    | -6.01          | 0.00           | 0.76          | BRAF; MEK                     |
| 1429172_a_at       | Ncapg         | on-SMC condensin I complex, subunit G                                                    | -6.02          | 0.00           | 0.26          | BRAF; MEK                     |
| 1439129_at         | Dock5         | dedicator of cytokinesis 5                                                               | -6.02          | 0.00           | 0.37          | ; MEK                         |
| 1458447_at         | Cenpf         | centromere protein F                                                                     | -6.02          | 0.00           | 0.65          |                               |
| 1425271_at         | Psmc3ip       | proteasome (prosome, macropain) 26S subunit, ATPase 3, interacting protein               | -6.02          | 0.00           | 0.41          | BRAF; MEK                     |
| 1431358_at         | 4930547N16Rik | RIKEN cDNA 4930547N16 gene                                                               | -6.02          | 0.00           | 0.37          | BRAF; MEK                     |
| 1418919_at         | Sgol1         | shugoshin-like 1 (S. pombe)                                                              | -6.02          | 0.00           | 0.27          | BRAF; MEK                     |
| 1452954_at         | Ube2c         | ubiquitin-conjugating enzyme E2C                                                         | -6.02          | 0.00           | 0.34          | BRAF; MEK                     |
| 1417926_at         | Ncapg2        | non-SMC condensin II complex, subunit G2                                                 | -6.03          | 0.00           | 0.20          | BRAF; MEK                     |
| 1423850_at         | Nsun2         | NOL1/NOP2/Sun domain family member 2                                                     | -6.03          | 0.00           | 0.61          | BRAF; MEK                     |
| 1424118_a_at       | Spc25         | SPC25, NDC80 kinetochore complex component, homolog (S. cerevisiae)                      | -6.04          | 0.00           | 0.39          | BRAF; MEK                     |
| 1449708_s_at       | Chek1         | checkpoint kinase 1 homolog (S. pombe)                                                   | -6.04          | 0.00           | 0.30          | BRAF; MEK                     |
| 1438459_x_at       | Sfpq          | splicing factor proline/glutamine rich (polypyrimidine tract binding protein associated) | -6.04          | 0.00           | 0.50          | BRAF; MEK                     |
| 1419153_at         | 2810417H13Rik | RIKEN cDNA 2810417H13 gene                                                               | -6.04          | 0.00           | 0.23          | BRAF; MEK                     |
| 1423481_at         | Riok2         | RIO kinase 2 (yeast)                                                                     | -6.04          | 0.00           | 0.64          |                               |
| 1450692_at         | Kif4          | kinesin family member 4                                                                  | -6.05          | 0.00           | 0.32          | BRAF; MEK                     |
| 1450862_at         | Rad54l        | RAD54 like (S. cerevisiae)                                                               | -6.05          | 0.00           | 0.27          | BRAF; MEK                     |
| 1453562_a_at       | Nmral1        | NmrA-like family domain containing 1                                                     | -6.05          | 0.00           | 0.48          | BRAF; MEK                     |
| 1438811_at         | Dlgap5        | discs, large (Drosophila) homolog-associated protein 5                                   | -6.05          | 0.00           | 0.53          | BRAF; MEK                     |
| 1429812_at         | 2610002D18Rik | RIKEN cDNA 2610002D18 gene                                                               | -6.05          | 0.00           | 0.43          | BRAF; MEK                     |
| 1422944_a_at       | Diap3         | diaphanous homolog 3 (Drosophila)                                                        | -6.06          | 0.00           | 0.30          | BRAF; MEK                     |
| 1417091_at         | Chuk          | conserved helix-loop-helix ubiquitous kinase                                             | -6.06          | 0.00           | 0.74          | n.r. ; n.r.                   |
| 1448191_at         | Plk1          | polo-like kinase 1 (Drosophila)                                                          | -6.06          | 0.00           | 0.28          | BRAF; MEK                     |
| 1452983_at         | Cep57         | centrosomal protein 57                                                                   | -6.07          | 0.00           | 0.65          | ; MEK                         |
| 1435029_at         | NA            | NA                                                                                       | -6.07          | 0.00           | 0.49          | n.r. ; n.r.                   |
| 1434630_at         | Ankrd28       | ankyrin repeat domain 28                                                                 | -6.07          | 0.00           | 0.46          | BRAF; MEK                     |
| 1418264_at         | Cenpk         | centromere protein K                                                                     | -6.07          | 0.00           | 0.39          | BRAF; MEK                     |
| 1416176_at         | Hmgb1         | high mobility group box 1                                                                | -6.07          | 0.00           | 0.56          | BRAF; MEK                     |
| 1455049_at         | Igsf3         | immunoglobulin superfamily, member 3                                                     | -6.07          | 0.00           | 0.66          | BRAF; MEK                     |
| 1431506_s_at       | Pp1h          | peptidyl prolyl isomerase H                                                              | -6.08          | 0.00           | 0.60          | BRAF; MEK                     |
| 1416730_at         | Rcl1          | RNA terminal phosphate cyclase-like 1                                                    | -6.08          | 0.00           | 0.62          | BRAF; MEK                     |
| 1455855_x_at       | Agxt2l2       | alanine-glyoxylate aminotransferase 2-like 2                                             | -6.08          | 0.00           | 0.69          | BRAF; MEK                     |
| 1434892_x_at       | Rbbp4         | retinoblastoma binding protein 4                                                         | -6.08          | 0.00           | 0.64          | BRAF; MEK                     |
| 1452210_at         | Dna2          | DNA replication helicase 2 homolog (yeast)                                               | -6.09          | 0.00           | 0.27          | BRAF; MEK                     |
| 1418665_at         | Impa2         | inositol (myo)-1(or 4)-monophosphatase 2                                                 | -6.09          | 0.00           | 0.59          | BRAF; MEK                     |
| 1424226_at         | 9030617O03Rik | RIKEN cDNA 9030617O03 gene                                                               | -6.09          | 0.00           | 0.70          | BRAF; n.r.                    |
| 1424511_at         | Aurka         | aurora kinase A                                                                          | -6.09          | 0.00           | 0.32          | BRAF; MEK                     |
| 1415878_at         | Rrm1          | ribonucleotide reductase M1                                                              | -6.09          | 0.00           | 0.40          | BRAF; MEK                     |
| 1423311_s_at       | Tpbp          | trophoblast glycoprotein                                                                 | -6.09          | 0.00           | 0.34          | BRAF; MEK                     |

| <b>Probeset ID</b> | <b>Symbol</b> | <b>Gene Name</b>                                                                                  | <b>d-value</b> | <b>q-value</b> | <b>R-fold</b> | <b>Expression reversed by</b> |
|--------------------|---------------|---------------------------------------------------------------------------------------------------|----------------|----------------|---------------|-------------------------------|
| 1418226_at         | Orc2l         | origin recognition complex. subunit 2-like (S. cerevisiae)                                        | -6.10          | 0.00           | 0.63          |                               |
| 1432026_a_at       | Herc5         | hect domain and RLD 5                                                                             | -6.10          | 0.00           | 0.52          | ; n.r.                        |
| 1433909_at         | Syt17         | synaptotagmin XVII                                                                                | -6.10          | 0.00           | 0.47          | n.r. ; MEK                    |
| 1451286_s_at       | Fus           | fusion. derived from t(12;16) malignant liposarcoma (human)                                       | -6.10          | 0.00           | 0.43          | BRAF; MEK                     |
| 1425255_s_at       | Hnrpl         | heterogeneous nuclear ribonucleoprotein L-like                                                    | -6.11          | 0.00           | 0.58          | BRAF; MEK                     |
| 1423092_at         | Incenp        | inner centromere protein                                                                          | -6.11          | 0.00           | 0.33          | BRAF; MEK                     |
| 1416998_at         | Rrs1          | RRS1 ribosome biogenesis regulator homolog (S. cerevisiae)                                        | -6.11          | 0.00           | 0.57          | BRAF; MEK                     |
| 1426421_s_at       | Rbm26         | RNA binding motif protein 26                                                                      | -6.11          | 0.00           | 0.76          | n.r. ;                        |
| 1436584_at         | Spry2         | sprouty homolog 2 (Drosophila)                                                                    | -6.11          | 0.00           | 0.43          | BRAF; MEK                     |
| 1451649_a_at       | Wdr75         | WD repeat domain 75                                                                               | -6.12          | 0.00           | 0.63          | BRAF; MEK                     |
| 1418305_s_at       | Nola1         | nucleolar protein family A. member 1 (H/ACA small nucleolar RNPs)                                 | -6.12          | 0.00           | 0.53          | BRAF; MEK                     |
| 1451317_at         | Ythdf2        | YTH domain family 2                                                                               | -6.12          | 0.00           | 0.69          | BRAF; MEK                     |
| 1448586_at         | Hspa14        | heat shock protein 14                                                                             | -6.13          | 0.00           | 0.69          | BRAF; MEK                     |
| 1416410_at         | Pafah1b3      | platelet-activating factor acetylhydrolase. isoform 1b. alpha1 subunit                            | -6.14          | 0.00           | 0.36          | BRAF; MEK                     |
| 1430982_at         | LOC100048559  | similar to splicing factor. arginine/serine-rich 1 (splicing factor 2. alternate splicing factor) | -6.14          | 0.00           | 0.47          | BRAF; MEK                     |
| 1456280_at         | Clspn         | claspin homolog (Xenopus laevis)                                                                  | -6.14          | 0.00           | 0.25          | BRAF; MEK                     |
| 1422865_at         | Runx1         | runt related transcription factor 1                                                               | -6.15          | 0.00           | 0.40          | BRAF; MEK                     |
| 1426788_a_at       | Ssrp1         | structure specific recognition protein 1                                                          | -6.15          | 0.00           | 0.54          | BRAF; MEK                     |
| 1451180_a_at       | Nt5c3l        | 5'-nucleotidase. cytosolic III-like                                                               | -6.15          | 0.00           | 0.70          | BRAF; MEK                     |
| 1428518_at         | Mlf1ip        | myeloid leukemia factor 1 interacting protein                                                     | -6.15          | 0.00           | 0.36          | BRAF; MEK                     |
| 1455727_at         | Zrsr2         | zinc finger (CCCH type). RNA binding motif and serine/arginine rich 2                             | -6.16          | 0.00           | 0.64          | BRAF; MEK                     |
| 1452778_x_at       | Nap111        | nucleosome assembly protein 1-like 1                                                              | -6.16          | 0.00           | 0.65          | BRAF; MEK                     |
| 1417300_at         | Smpdl3b       | sphingomyelin phosphodiesterase. acid-like 3B                                                     | -6.16          | 0.00           | 0.63          | BRAF; MEK                     |
| 1451163_at         | Tinf2         | Terf1 (TRF1)-interacting nuclear factor 2                                                         | -6.17          | 0.00           | 0.49          | BRAF; MEK                     |
| 1453181_x_at       | Plscr1        | phospholipid scramblase 1                                                                         | -6.17          | 0.00           | 0.30          | BRAF; MEK                     |
| 1415782_at         | Sumo2         | SMT3 suppressor of mif two 3 homolog 2 (yeast)                                                    | -6.17          | 0.00           | 0.77          | BRAF; MEK                     |
| 1435114_at         | Wdhd1         | WD repeat and HMG-box DNA binding protein 1                                                       | -6.17          | 0.00           | 0.32          | BRAF; MEK                     |
| 1430020_x_at       | Hnmpa1        | heterogeneous nuclear ribonucleoprotein A1                                                        | -6.18          | 0.00           | 0.44          | BRAF; MEK                     |
| 1429558_a_at       | Larp7         | La ribonucleoprotein domain family. member 7                                                      | -6.18          | 0.00           | 0.56          | BRAF; MEK                     |
| 1439464_s_at       | Tex10         | testis expressed gene 10                                                                          | -6.18          | 0.00           | 0.61          | BRAF; MEK                     |
| 1448944_at         | Nrp1          | neuropilin 1                                                                                      | -6.18          | 0.00           | 0.29          | BRAF; MEK                     |
| 1419471_a_at       | Nudc          | nuclear distribution gene C homolog (Aspergillus)                                                 | -6.18          | 0.00           | 0.60          | BRAF; MEK                     |
| 1434941_s_at       | Esf1          | ESF1. nucleolar pre-rRNA processing protein. homolog (S. cerevisiae)                              | -6.18          | 0.00           | 0.64          | ; MEK                         |
| 1418969_at         | Skp2          | S-phase kinase-associated protein 2 (p45)                                                         | -6.19          | 0.00           | 0.39          | BRAF; MEK                     |
| 1428498_at         | Rnf219        | ring finger protein 219                                                                           | -6.19          | 0.00           | 0.52          | BRAF; MEK                     |
| 1420707_a_at       | Traip         | TRAF-interacting protein                                                                          | -6.19          | 0.00           | 0.42          | BRAF; MEK                     |
| 1416283_at         | Gart          | phosphoribosylglycinamide formyltransferase                                                       | -6.20          | 0.00           | 0.56          | BRAF; MEK                     |
| 1415914_at         | Hnmpab        | heterogeneous nuclear ribonucleoprotein A/B                                                       | -6.20          | 0.00           | 0.64          | BRAF; MEK                     |
| 1452717_at         | Slc25a24      | solute carrier family 25 (mitochondrial carrier. phosphate carrier). member 24                    | -6.20          | 0.00           | 0.74          | BRAF; MEK                     |
| 1420365_a_at       | Hnmpa2b1      | heterogeneous nuclear ribonucleoprotein A2/B1                                                     | -6.20          | 0.00           | 0.47          | BRAF; MEK                     |
| 1455035_s_at       | Nol5a         | nucleolar protein 5A                                                                              | -6.21          | 0.00           | 0.45          | BRAF; MEK                     |
| 1418380_at         | Terf1         | telomeric repeat binding factor 1                                                                 | -6.21          | 0.00           | 0.39          | BRAF; MEK                     |
| 1417450_a_at       | Tacc3         | transforming. acidic coiled-coil containing protein 3                                             | -6.21          | 0.00           | 0.29          | BRAF; MEK                     |
| 1415730_at         | 573045316Rik  | RIKEN cDNA 573045316 gene                                                                         | -6.21          | 0.00           | 0.75          | BRAF; MEK                     |
| 1417260_at         | U2af2         | U2 small nuclear ribonucleoprotein auxiliary factor (U2AF) 2                                      | -6.21          | 0.00           | 0.66          | BRAF; MEK                     |
| 1416988_at         | Msh2          | mutS homolog 2 (E. coli)                                                                          | -6.22          | 0.00           | 0.35          | BRAF; MEK                     |
| 1448670_at         | Ube2e3        | ubiquitin-conjugating enzyme E2E 3. UBC4/5 homolog (yeast)                                        | -6.22          | 0.00           | 0.57          | BRAF; MEK                     |
| 1452725_a_at       | Rnaseh2a      | ribonuclease H2. large subunit                                                                    | -6.22          | 0.00           | 0.49          | BRAF; MEK                     |
| 1416592_at         | Glrx          | glutaredoxin                                                                                      | -6.22          | 0.00           | 0.48          |                               |
| 1417844_at         | Med4          | mediator of RNA polymerase II transcription. subunit 4 homolog (yeast)                            | -6.23          | 0.00           | 0.64          | ; MEK                         |
| 1455218_at         | 6330503K22Rik | RIKEN cDNA 6330503K22 gene                                                                        | -6.23          | 0.00           | 0.56          | BRAF; MEK                     |
| 1428869_at         | Nolc1         | nucleolar and coiled-body phosphoprotein 1                                                        | -6.23          | 0.00           | 0.47          | BRAF; MEK                     |
| 1425023_at         | Usp3          | ubiquitin specific peptidase 3                                                                    | -6.24          | 0.00           | 0.67          | BRAF; MEK                     |
| 1421914_s_at       | Mrpl19        | mitochondrial ribosomal protein L19                                                               | -6.24          | 0.00           | 0.67          | BRAF; MEK                     |

| <b>Probeset ID</b> | <b>Symbol</b> | <b>Gene Name</b>                                                       | <b>d-value</b> | <b>q-value</b> | <b>R-fold</b> | <b>Expression reversed by</b> |
|--------------------|---------------|------------------------------------------------------------------------|----------------|----------------|---------------|-------------------------------|
| 1437251_at         | Cdca2         | cell division cycle associated 2                                       | -6.24          | 0.00           | 0.30          | BRAF; MEK                     |
| 1426864_a_at       | Ncam1         | neural cell adhesion molecule 1                                        | -6.24          | 0.00           | 0.31          | BRAF; MEK                     |
| 1433946_at         | Zik1          | zinc finger protein interacting with K protein 1                       | -6.24          | 0.00           | 0.40          | BRAF; MEK                     |
| 1460669_at         | Ilf3          | interleukin enhancer binding factor 3                                  | -6.24          | 0.00           | 0.64          | BRAF; MEK                     |
| 1450084_s_at       | Ivns1abp      | influenza virus NS1A binding protein                                   | -6.25          | 0.00           | 0.42          | ; MEK                         |
| 1426419_at         | Rbm26         | RNA binding motif protein 26                                           | -6.26          | 0.00           | 0.52          | ; MEK                         |
| 1448176_a_at       | Hnmpk         | heterogeneous nuclear ribonucleoprotein K                              | -6.26          | 0.00           | 0.78          | BRAF; MEK                     |
| 1451080_at         | Usp1          | ubiquitin specific peptidase 1                                         | -6.28          | 0.00           | 0.38          | BRAF; MEK                     |
| 1430530_s_at       | Nmral1        | NmrA-like family domain containing 1                                   | -6.28          | 0.00           | 0.39          | BRAF; MEK                     |
| 1423463_a_at       | D2Erd750e     | DNA segment. Chr 2. ERATO Doi 750. expressed                           | -6.28          | 0.00           | 0.34          | BRAF; MEK                     |
| 1451069_at         | Pim3          | proviral integration site 3                                            | -6.28          | 0.00           | 0.45          | BRAF; MEK                     |
| 1422509_at         | U2af1         | U2 small nuclear ribonucleoprotein auxiliary factor (U2AF) 1           | -6.28          | 0.00           | 0.41          | BRAF; MEK                     |
| 1416873_a_at       | Cdk2          | cyclin-dependent kinase 2                                              | -6.29          | 0.00           | 0.54 *        | BRAF; MEK                     |
| 1449094_at         | Gjc1          | gap junction protein. gamma 1                                          | -6.29          | 0.00           | 0.43          | BRAF; MEK                     |
| 1417299_at         | Nek2          | NIMA (never in mitosis gene a)-related expressed kinase 2              | -6.29          | 0.00           | 0.39          | BRAF; MEK                     |
| 1433766_at         | C330023M02Rik | RIKEN cDNA C330023M02 gene                                             | -6.30          | 0.00           | 0.66          | BRAF; MEK                     |
| 1422460_at         | Mad211        | MAD2 (mitotic arrest deficient. homolog)-like 1 (yeast)                | -6.30          | 0.00           | 0.33          | BRAF; MEK                     |
| 1440344_at         | NA            | NA                                                                     | -6.30          | 0.00           | 0.65          | BRAF; MEK                     |
| 1418114_at         | Rbpj          | recombination signal binding protein for immunoglobulin kappa J region | -6.30          | 0.00           | 0.51          | BRAF; MEK                     |
| 1416309_at         | Nusap1        | nucleolar and spindle associated protein 1                             | -6.31          | 0.00           | 0.34          | BRAF; MEK                     |
| 1429326_at         | Cenpl         | centromere protein L                                                   | -6.31          | 0.00           | 0.44          | BRAF; MEK                     |
| 1419644_at         | Cstf2         | cleavage stimulation factor. 3' pre-RNA subunit 2                      | -6.31          | 0.00           | 0.50          | BRAF; MEK                     |
| 1449491_at         | Card10        | caspase recruitment domain family. member 10                           | -6.31          | 0.00           | 0.41          | BRAF; MEK                     |
| 1423682_a_at       | Cdca4         | cell division cycle associated 4                                       | -6.31          | 0.00           | 0.46          | BRAF; MEK                     |
| 1455834_x_at       | Tacc3         | transforming. acidic coiled-coil containing protein 3                  | -6.32          | 0.00           | 0.46          | BRAF; MEK                     |
| 1455529_at         | Mex3a         | mex3 homolog A (C. elegans)                                            | -6.32          | 0.00           | 0.49          | BRAF; MEK                     |
| 1446196_at         | Hmga2         | high mobility group AT-hook 2                                          | -6.32          | 0.00           | 0.28          | BRAF; MEK                     |
| 1434888_a_at       | Matr3         | matrin 3                                                               | -6.33          | 0.00           | 0.65          | ; MEK                         |
| 1421612_a_at       | H2afy2        | H2A histone family. member Y2                                          | -6.33          | 0.00           | 0.46          | BRAF; MEK                     |
| 1424877_a_at       | Alad          | aminolevulinate. delta-. dehydratase                                   | -6.33          | 0.00           | 0.43          | BRAF; MEK                     |
| 1428908_at         | Rbm25         | RNA binding motif protein 25                                           | -6.33          | 0.00           | 0.56          | BRAF; MEK                     |
| 1428480_at         | Cdca8         | cell division cycle associated 8                                       | -6.34          | 0.00           | 0.34          | BRAF; MEK                     |
| 1451294_s_at       | Snrpe         | small nuclear ribonucleoprotein E                                      | -6.34          | 0.00           | 0.68          | BRAF; MEK                     |
| 1428639_at         | Lin9          | lin-9 homolog (C. elegans)                                             | -6.34          | 0.00           | 0.40          | BRAF; MEK                     |
| 1427983_at         | Zfp280c       | zinc finger protein 280c                                               | -6.34          | 0.00           | 0.61          | BRAF; MEK                     |
| 1423774_a_at       | Prc1          | protein regulator of cytokinesis 1                                     | -6.35          | 0.00           | 0.29          | BRAF; MEK                     |
| 1415839_a_at       | Npm1          | nucleophosmin 1                                                        | -6.35          | 0.00           | 0.77          | ; MEK                         |
| 1435054_at         | Eme1          | essential meiotic endonuclease 1 homolog 1 (S. pombe)                  | -6.37          | 0.00           | 0.47          | BRAF; MEK                     |
| 1447363_s_at       | Bub1b         | budding uninhibited by benzimidazoles 1 homolog. beta (S. cerevisiae)  | -6.37          | 0.00           | 0.22          | BRAF; MEK                     |
| 1420479_a_at       | Nap111        | nucleosome assembly protein 1-like 1                                   | -6.37          | 0.00           | 0.61          |                               |
| 1450963_at         | Hnmpf         | heterogeneous nuclear ribonucleoprotein F                              | -6.37          | 0.00           | 0.55          | BRAF                          |
| 1454955_at         | Ipo7          | importin 7                                                             | -6.38          | 0.00           | 0.61          | n.r. ;                        |
| 1448271_a_at       | Ddx21         | DEAD (Asp-Glu-Ala-Asp) box polypeptide 21                              | -6.38          | 0.00           | 0.49          | BRAF                          |
| 1434392_at         | Usp34         | ubiquitin specific peptidase 34                                        | -6.38          | 0.00           | 0.71          | ; MEK                         |
| 1417506_at         | Gmnn          | geminin                                                                | -6.38          | 0.00           | 0.28          | BRAF; MEK                     |
| 1437154_at         | Cep170        | centrosomal protein 170                                                | -6.38          | 0.00           | 0.68          | ; MEK                         |
| 1415849_s_at       | Stmn1         | stathmin 1                                                             | -6.39          | 0.00           | 0.30          | BRAF; MEK                     |
| 1424552_at         | Casp8         | caspase 8                                                              | -6.39          | 0.00           | 0.53          | BRAF; MEK                     |
| 1420616_at         | Ash2l         | ash2 (absent. small. or homeotic)-like (Drosophila)                    | -6.39          | 0.00           | 0.63          | BRAF; MEK                     |
| 1428104_at         | Tpx2          | TPX2. microtubule-associated protein homolog (Xenopus laevis)          | -6.39          | 0.00           | 0.37          | BRAF; MEK                     |
| 1416684_at         | Fbl           | fibrillarin                                                            | -6.40          | 0.00           | 0.48          | BRAF; MEK                     |
| 1451137_a_at       | Brd8          | bromodomain containing 8                                               | -6.40          | 0.00           | 0.54          | BRAF; MEK                     |
| 1448526_at         | Kpnb1         | karyopherin (importin) beta 1                                          | -6.41          | 0.00           | 0.71          | BRAF; MEK                     |
| 1415973_at         | Marcks        | myristoylated alanine rich protein kinase C substrate                  | -6.41          | 0.00           | 0.58          | BRAF; MEK                     |
| 1428543_at         | Ppat          | phosphoribosyl pyrophosphate amidotransferase                          | -6.42          | 0.00           | 0.42          | BRAF; MEK                     |

| <b>Probeset ID</b> | <b>Symbol</b> | <b>Gene Name</b>                                                                            | <b>d-value</b> | <b>q-value</b> | <b>R-fold</b> | <b>Expression reversed by</b> |
|--------------------|---------------|---------------------------------------------------------------------------------------------|----------------|----------------|---------------|-------------------------------|
| 1415972_at         | Marcks        | myristoylated alanine rich protein kinase C substrate                                       | -6.42          | 0.00           | 0.55          | BRAF; MEK                     |
| 1435005_at         | Cenpe         | centromere protein E                                                                        | -6.42          | 0.00           | 0.26          | BRAF; MEK                     |
| 1453226_at         | 3000004C01Rik | RIKEN cDNA 3000004C01 gene                                                                  | -6.42          | 0.00           | 0.31          | BRAF; MEK                     |
| 1428976_at         | Tmpo          | thymopoietin                                                                                | -6.43          | 0.00           | 0.44          | BRAF; MEK                     |
| 1448465_at         | Nipsnap1      | 4-nitrophenylphosphatase domain and non-neuronal SNAP25-like protein homolog 1 (C. elegans) | -6.43          | 0.00           | 0.63          | BRAF; MEK                     |
| 1435938_at         | Ckap2l        | cytoskeleton associated protein 2-like                                                      | -6.43          | 0.00           | 0.45          | BRAF; MEK                     |
| 1450496_a_at       | 2810433K01Rik | RIKEN cDNA 2810433K01 gene                                                                  | -6.43          | 0.00           | 0.24          | BRAF; MEK                     |
| 1418334_at         | Dbf4          | DBF4 homolog (S. cerevisiae)                                                                | -6.43          | 0.00           | 0.35          | BRAF; MEK                     |
| 1455043_at         | Tnp01         | transportin 1                                                                               | -6.43          | 0.00           | 0.57          | BRAF; n.r.                    |
| 1416177_at         | Rbmxt         | RNA binding motif protein. X chromosome retrogene                                           | -6.44          | 0.00           | 0.53          | BRAF; MEK                     |
| 1417586_at         | Timeless      | timeless homolog (Drosophila)                                                               | -6.44          | 0.00           | 0.31          | BRAF; MEK                     |
| 1438221_at         | D1ErtD53e     | DNA segment. Chr 1. ERATO Doi 53. expressed                                                 | -6.44          | 0.00           | 0.55          | n.r. ; MEK                    |
| 1425483_at         | Tox           | thymocyte selection-associated high mobility group box                                      | -6.44          | 0.00           | 0.30          |                               |
| 1436549_a_at       | Hnmpa1        | heterogeneous nuclear ribonucleoprotein A1                                                  | -6.45          | 0.00           | 0.55          | ; MEK                         |
| 1454814_s_at       | AU021838      | expressed sequence AU021838                                                                 | -6.45          | 0.00           | 0.59          | BRAF; MEK                     |
| 1422540_at         | Fbln1         | fibulin 1                                                                                   | -6.46          | 0.00           | 0.48          | BRAF; MEK                     |
| 1424292_at         | Depdc1a       | DEP domain containing 1a                                                                    | -6.46          | 0.00           | 0.22          | BRAF; MEK                     |
| 1419513_a_at       | Ect2          | ect2 oncogene                                                                               | -6.46          | 0.00           | 0.24          | BRAF; MEK                     |
| 1417998_at         | Ptges3        | prostaglandin E synthase 3 (cytosolic)                                                      | -6.46          | 0.00           | 0.72          | BRAF; MEK                     |
| 1432538_a_at       | Rfc3          | replication factor C (activator 1) 3                                                        | -6.47          | 0.00           | 0.36          | BRAF; MEK                     |
| 1455305_x_at       | Hnmpa1        | heterogeneous nuclear ribonucleoprotein A1                                                  | -6.47          | 0.00           | 0.54          | ; MEK                         |
| 1436808_x_at       | Mcm5          | minichromosome maintenance deficient 5. cell division cycle 46 (S. cerevisiae)              | -6.47          | 0.00           | 0.23          | BRAF; MEK                     |
| 1423772_x_at       | Slc25a5       | solute carrier family 25 (mitochondrial carrier. adenine nucleotide translocator). member 5 | -6.47          | 0.00           | 0.71          | BRAF; MEK                     |
| 1417445_at         | Ndc80         | NDC80 homolog. kinetochore complex component (S. cerevisiae)                                | -6.47          | 0.00           | 0.27          | BRAF; MEK                     |
| 1433781_a_at       | Cldn12        | claudin 12                                                                                  | -6.47          | 0.00           | 0.48          | BRAF; MEK                     |
| 1416251_at         | Mcm6          | minichromosome maintenance deficient 6 (MIS5 homolog. S. pombe) (S. cerevisiae)             | -6.47          | 0.00           | 0.24          | BRAF; MEK                     |
| 1421936_at         | Dapp1         | dual adaptor for phosphotyrosine and 3-phosphoinositides 1                                  | -6.48          | 0.00           | 0.44          | ; MEK                         |
| 1453002_at         | Sox11         | SRY-box containing gene 11                                                                  | -6.48          | 0.00           | 0.45          | BRAF; MEK                     |
| 1456475_s_at       | Prkar2b       | protein kinase. cAMP dependent regulatory. type II beta                                     | -6.49          | 0.00           | 0.19          | BRAF; MEK                     |
| 1434403_at         | Spred2        | sprouty-related. EVH1 domain containing 2                                                   | -6.49          | 0.00           | 0.47          | BRAF; MEK                     |
| 1419360_a_at       | Ss18          | synovial sarcoma translocation. Chromosome 18                                               | -6.50          | 0.00           | 0.71          | ; MEK                         |
| 1458440_at         | Specc1        | sperm antigen with calponin homology and coiled-coil domains 1                              | -6.50          | 0.00           | 0.50          |                               |
| 1437945_x_at       | Nap111        | nucleosome assembly protein 1-like 1                                                        | -6.51          | 0.00           | 0.68          | BRAF; MEK                     |
| 1426476_at         | Rasa1         | RAS p21 protein activator 1                                                                 | -6.51          | 0.00           | 0.55          |                               |
| 1426386_at         | Rpl71         | ribosomal protein L7-like 1                                                                 | -6.51          | 0.00           | 0.60          | BRAF; MEK                     |
| 1416068_at         | Kars          | lysyl-tRNA synthetase                                                                       | -6.51          | 0.00           | 0.75          | BRAF; MEK                     |
| 1415945_at         | Mcm5          | minichromosome maintenance deficient 5. cell division cycle 46 (S. cerevisiae)              | -6.51          | 0.00           | 0.21          | BRAF; MEK                     |
| 1449171_at         | Ttk           | Ttk protein kinase                                                                          | -6.51          | 0.00           | 0.19          | BRAF; MEK                     |
| 1436953_at         | Wipf1         | WAS/WASL interacting protein family. member 1                                               | -6.51          | 0.00           | 0.70          | BRAF; MEK                     |
| 1426351_at         | Hspd1         | heat shock protein 1 (chaperonin)                                                           | -6.52          | 0.00           | 0.63          | ; MEK                         |
| 1455730_at         | Dlgap5        | discs. large (Drosophila) homolog-associated protein 5                                      | -6.52          | 0.00           | 0.34          | BRAF; MEK                     |
| 1417262_at         | Ptgs2         | prostaglandin-endoperoxide synthase 2                                                       | -6.52          | 0.00           | 0.19          |                               |
| 1416969_at         | Gtse1         | G two S phase expressed protein 1                                                           | -6.53          | 0.00           | 0.51          | BRAF                          |
| 1428907_at         | Rbm25         | RNA binding motif protein 25                                                                | -6.53          | 0.00           | 0.60          | BRAF; MEK                     |
| 1438673_at         | Slc4a7        | solute carrier family 4. sodium bicarbonate cotransporter. member 7                         | -6.54          | 0.00           | 0.53          |                               |
| 1425416_s_at       | Psrc1         | proline/serine-rich coiled-coil 1                                                           | -6.54          | 0.00           | 0.54          | BRAF; n.r.                    |
| 1417458_s_at       | Cks2          | CDC28 protein kinase regulatory subunit 2                                                   | -6.54          | 0.00           | 0.43          | BRAF; MEK                     |
| 1428481_s_at       | Cdca8         | cell division cycle associated 8                                                            | -6.55          | 0.00           | 0.31          | BRAF; MEK                     |
| 1424991_s_at       | Tyms          | thymidylate synthase                                                                        | -6.55          | 0.00           | 0.37          | BRAF; MEK                     |
| 1434541_x_at       | Khdrbs1       | KH domain containing. RNA binding. signal transduction associated 1                         | -6.55          | 0.00           | 0.65          | BRAF; MEK                     |
| 1434767_at         | C79407        | expressed sequence C79407                                                                   | -6.55          | 0.00           | 0.26          | BRAF; MEK                     |
| 1417947_at         | Pcna          | proliferating cell nuclear antigen                                                          | -6.55          | 0.00           | 0.44 *        | BRAF; MEK                     |
| 1434789_at         | Depdc1b       | DEP domain containing 1B                                                                    | -6.56          | 0.00           | 0.32          | BRAF; MEK                     |

| <b>Probeset ID</b> | <b>Symbol</b>     | <b>Gene Name</b>                                                                                  | <b>d-value</b> | <b>q-value</b> | <b>R-fold</b> | <b>Expression reversed by</b> |
|--------------------|-------------------|---------------------------------------------------------------------------------------------------|----------------|----------------|---------------|-------------------------------|
| 1452291_at         | Centd1            | centaurin. delta 1                                                                                | -6.56          | 0.00           | 0.42          | BRAF; MEK                     |
| 1442595_at         | NA                | NA                                                                                                | -6.56          | 0.00           | 0.34          | BRAF                          |
| 1418480_at         | Pbbp              | pro-platelet basic protein                                                                        | -6.56          | 0.00           | 0.08          | ; MEK                         |
| 1416779_at         | Sdpr              | serum deprivation response                                                                        | -6.56          | 0.00           | 0.70          | n.r. ; n.r.                   |
| 1418027_at         | Exo1              | exonuclease 1                                                                                     | -6.56          | 0.00           | 0.29          | BRAF                          |
| 1428593_at         | 1700029F09Rik     | RIKEN cDNA 1700029F09 gene                                                                        | -6.56          | 0.00           | 0.46          | BRAF; MEK                     |
| 1417910_at         | Ccna2             | cyclin A2                                                                                         | -6.57          | 0.00           | 0.26 *        | BRAF; MEK                     |
| 1449217_at         | Casp8ap2          | caspase 8 associated protein 2                                                                    | -6.58          | 0.00           | 0.43          | ; MEK                         |
| 1425837_a_at       | Ccrn4l            | CCR4 carbon catabolite repression 4-like (S. cerevisiae)                                          | -6.58          | 0.00           | 0.53          | ; MEK                         |
| 1452168_x_at       | Gspt1             | G1 to S phase transition 1                                                                        | -6.59          | 0.00           | 0.75          | BRAF; n.r.                    |
| 1436847_s_at       | Cdca8             | cell division cycle associated 8                                                                  | -6.61          | 0.00           | 0.29          | BRAF; MEK                     |
| 1420592_a_at       | Anp32e            | acidic (leucine-rich) nuclear phosphoprotein 32 family. member E                                  | -6.61          | 0.00           | 0.46          | BRAF; MEK                     |
| 1429739_a_at       | Patz1             | POZ (BTB) and AT hook containing zinc finger 1                                                    | -6.62          | 0.00           | 0.49          | BRAF; MEK                     |
| 1429724_at         | Prpf4             | PRP4 pre-mRNA processing factor 4 homolog (yeast)                                                 | -6.62          | 0.00           | 0.64          | BRAF; MEK                     |
| 1450677_at         | Chek1             | checkpoint kinase 1 homolog (S. pombe)                                                            | -6.62          | 0.00           | 0.28          | BRAF; MEK                     |
| 1423127_at         | Impa1             | inositol (myo)-1(or 4)-monophosphatase 1                                                          | -6.62          | 0.00           | 0.78          | BRAF; MEK                     |
| 1438664_at         | Prkar2b           | protein kinase. cAMP dependent regulatory. type II beta                                           | -6.62          | 0.00           | 0.20          | BRAF; MEK                     |
| 1426736_at         | Gspt1             | G1 to S phase transition 1                                                                        | -6.63          | 0.00           | 0.76          | BRAF; n.r.                    |
| 1433685_a_at       | 6430706D22Rik     | RIKEN cDNA 6430706D22 gene                                                                        | -6.64          | 0.00           | 0.42          | BRAF; MEK                     |
| 1419058_at         | Polr1e            | polymerase (RNA) I polypeptide E                                                                  | -6.64          | 0.00           | 0.62          | BRAF; MEK                     |
| 1422286_a_at       | Tgif1             | TGFB-induced factor homeobox 1                                                                    | -6.64          | 0.00           | 0.46          | BRAF; MEK                     |
| 1418152_at         | Nsbp1             | nucleosome binding protein 1                                                                      | -6.65          | 0.00           | 0.27          | BRAF; MEK                     |
| 1421052_a_at       | Sms               | spermine synthase                                                                                 | -6.65          | 0.00           | 0.37          | BRAF; MEK                     |
| 1436708_x_at       | Mcm4              | minichromosome maintenance deficient 4 homolog (S. cerevisiae)                                    | -6.65          | 0.00           | 0.26          | BRAF; MEK                     |
| 1428232_at         | Cpsf6             | cleavage and polyadenylation specific factor 6                                                    | -6.67          | 0.00           | 0.68          | BRAF                          |
| 1424128_x_at       | Aurkb             | aurora kinase B                                                                                   | -6.67          | 0.00           | 0.23          | BRAF; MEK                     |
| 1416118_at         | Trim59            | tripartite motif-containing 59                                                                    | -6.67          | 0.00           | 0.48          | BRAF; MEK                     |
| 1424205_at         | Smarca5           | SWI/SNF related. matrix associated. actin dependent regulator of chromatin. subfamily a. member 5 | -6.67          | 0.00           | 0.57          | BRAF; MEK                     |
| 1452635_x_at       | Josd3             | Josephin domain containing 3                                                                      | -6.67          | 0.00           | 0.48          | BRAF; MEK                     |
| 1452881_at         | Gins2             | GINS complex subunit 2 (Psf2 homolog)                                                             | -6.68          | 0.00           | 0.44          | BRAF; MEK                     |
| 1418540_a_at       | Ptpre             | protein tyrosine phosphatase. receptor type. E                                                    | -6.68          | 0.00           | 0.43          | BRAF; MEK                     |
| 1420478_at         | Nap111            | nucleosome assembly protein 1-like 1                                                              | -6.68          | 0.00           | 0.67          | ; MEK                         |
| 1416030_a_at       | Mcm7              | minichromosome maintenance deficient 7 (S. cerevisiae)                                            | -6.68          | 0.00           | 0.27          | BRAF; MEK                     |
| 1450048_a_at       | Idh2              | isocitrate dehydrogenase 2 (NADP+). mitochondrial                                                 | -6.69          | 0.00           | 0.33          | BRAF; MEK                     |
| 1419172_at         | Dhfr              | dihydrofolate reductase                                                                           | -6.69          | 0.00           | 0.35          | BRAF; MEK                     |
| 1449060_at         | Kif2c             | kinesin family member 2C                                                                          | -6.69          | 0.00           | 0.25          | BRAF; MEK                     |
| 1449585_at         | Il1rap            | interleukin 1 receptor accessory protein                                                          | -6.69          | 0.00           | 0.54          | ; MEK                         |
| 1452189_at         | Wdr82             | WD repeat domain containing 82                                                                    | -6.70          | 0.00           | 0.71          | BRAF; MEK                     |
| 1439269_x_at       | Mcm7              | minichromosome maintenance deficient 7 (S. cerevisiae)                                            | -6.70          | 0.00           | 0.29          | BRAF; MEK                     |
| 1426652_at         | Mcm3              | minichromosome maintenance deficient 3 (S. cerevisiae)                                            | -6.70          | 0.00           | 0.28          | BRAF; MEK                     |
| 1438458_a_at       | Sfpq              | splicing factor proline/glutamine rich (polypyrimidine tract binding protein associated)          | -6.71          | 0.00           | 0.48          | BRAF; MEK                     |
| 1455038_at         | ENSMUSG0000074630 | predicted gene. ENSMUSG00000074630                                                                | -6.71          | 0.00           | 0.24          | BRAF; MEK                     |
| 1452659_at         | Dek               | DEK oncogene (DNA binding)                                                                        | -6.71          | 0.00           | 0.43          | BRAF; MEK                     |
| 1427541_x_at       | Hmmr              | hyaluronan mediated motility receptor (RHAMM)                                                     | -6.71          | 0.00           | 0.32          | BRAF; MEK                     |
| 1425142_a_at       | Hnmpd             | heterogeneous nuclear ribonucleoprotein D                                                         | -6.72          | 0.00           | 0.38          | BRAF; MEK                     |
| 1450156_a_at       | Hmmr              | hyaluronan mediated motility receptor (RHAMM)                                                     | -6.72          | 0.00           | 0.30          | BRAF; MEK                     |
| 1416939_at         | Ppa1              | pyrophosphatase (inorganic) 1                                                                     | -6.72          | 0.00           | 0.63          | BRAF; MEK                     |
| 1416488_at         | Ccng2             | cyclin G2                                                                                         | -6.72          | 0.00           | 0.50          | BRAF; MEK                     |
| 1444257_at         | Prr11             | proline rich 11                                                                                   | -6.72          | 0.00           | 0.39          | BRAF; MEK                     |
| 1416031_s_at       | Mcm7              | minichromosome maintenance deficient 7 (S. cerevisiae)                                            | -6.72          | 0.00           | 0.30          | BRAF; MEK                     |
| 1416212_at         | Magoh             | mago-nashi homolog. proliferation-associated (Drosophila)                                         | -6.72          | 0.00           | 0.65          | BRAF; MEK                     |
| 1434788_at         | D930050A07Rik     | RIKEN cDNA D930050A07 gene                                                                        | -6.72          | 0.00           | 0.48          | BRAF; MEK                     |
| 1451184_at         | Hnmpa3            | heterogeneous nuclear ribonucleoprotein A3                                                        | -6.73          | 0.00           | 0.50          | BRAF; MEK                     |
| 1449010_at         | Hspa4l            | heat shock protein 4 like                                                                         | -6.73          | 0.00           | 0.49          | BRAF; MEK                     |



| <b>Probeset ID</b> | <b>Symbol</b> | <b>Gene Name</b>                                                       | <b>d-value</b> | <b>q-value</b> | <b>R-fold</b> | <b>Expression reversed by</b> |
|--------------------|---------------|------------------------------------------------------------------------|----------------|----------------|---------------|-------------------------------|
| 1448957_at         | Rbpj          | recombination signal binding protein for immunoglobulin kappa J region | -6.74          | 0.00           | 0.50          | BRAF; MEK                     |
| 1439093_at         | NA            | NA                                                                     | -6.74          | 0.00           | 0.31          | BRAF; MEK                     |
| 1437910_at         | Tmem39b       | transmembrane protein 39b                                              | -6.75          | 0.00           | 0.71          | BRAF; MEK                     |
| 1416685_s_at       | Fbl           | fibrillarlin                                                           | -6.75          | 0.00           | 0.53          | BRAF; MEK                     |
| 1420476_a_at       | Nap111        | nucleosome assembly protein 1-like 1                                   | -6.75          | 0.00           | 0.57          | BRAF; MEK                     |
| 1429734_at         | 463243411Rik  | RIKEN cDNA 463243411 gene                                              | -6.75          | 0.00           | 0.36          | BRAF; n.r.                    |
| 1416961_at         | Bub1b         | budding uninhibited by benzimidazoles 1 homolog. beta (S. cerevisiae)  | -6.76          | 0.00           | 0.25          | BRAF; MEK                     |
| 1447547_at         | Ltp1          | latent transforming growth factor beta binding protein 1               | -6.76          | 0.00           | 0.41          | ; MEK                         |
| 1421731_a_at       | Fen1          | flap structure specific endonuclease 1                                 | -6.77          | 0.00           | 0.40          | BRAF; MEK                     |
| 1419184_a_at       | Fhl2          | four and a half LIM domains 2                                          | -6.77          | 0.00           | 0.49          | BRAF; MEK                     |
| 1450781_at         | Hmga2         | high mobility group AT-hook 2                                          | -6.77          | 0.00           | 0.23          | BRAF; MEK                     |
| 1449298_a_at       | Pde1a         | phosphodiesterase 1A. calmodulin-dependent                             | -6.77          | 0.00           | 0.20          | BRAF; MEK                     |
| 1432187_at         | Nup43         | nucleoporin 43                                                         | -6.77          | 0.00           | 0.52          | BRAF; MEK                     |
| 1437100_x_at       | Pim3          | proviral integration site 3                                            | -6.78          | 0.00           | 0.48          | BRAF; MEK                     |
| 1428233_at         | Cpsf6         | cleavage and polyadenylation specific factor 6                         | -6.78          | 0.00           | 0.54          | BRAF; MEK                     |
| 1429478_at         | 6720463M24Rik | RIKEN cDNA 6720463M24 gene                                             | -6.78          | 0.00           | 0.28          | BRAF; MEK                     |
| 1419943_s_at       | Ccnb1         | cyclin B1                                                              | -6.78          | 0.00           | 0.29 *        | BRAF; MEK                     |
| 1451928_a_at       | Rad18         | RAD18 homolog (S. cerevisiae)                                          | -6.78          | 0.00           | 0.35          | BRAF                          |
| 1424630_a_at       | Brca1         | breast cancer 1                                                        | -6.79          | 0.00           | 0.32          | BRAF; MEK                     |
| 1418026_at         | Exo1          | exonuclease 1                                                          | -6.79          | 0.00           | 0.22          | BRAF; MEK                     |
| 1454694_a_at       | Top2a         | topoisomerase (DNA) II alpha                                           | -6.79          | 0.00           | 0.22          | BRAF; MEK                     |
| 1438015_at         | Dkc1          | dyskeratosis congenita 1. dyskerin homolog (human)                     | -6.80          | 0.00           | 0.39          | BRAF; MEK                     |
| 1419270_a_at       | Dut           | deoxyuridine triphosphatase                                            | -6.80          | 0.00           | 0.32          | BRAF; MEK                     |
| 1424942_a_at       | Myc           | myelocytomatosis oncogene                                              | -6.80          | 0.00           | 0.41 *        | BRAF; MEK                     |
| 1422814_at         | Aspm          | asp (abnormal spindle)-like. microcephaly associated (Drosophila)      | -6.80          | 0.00           | 0.23          | BRAF; MEK                     |
| 1452241_at         | Topbp1        | topoisomerase (DNA) II binding protein 1                               | -6.81          | 0.00           | 0.39          | BRAF; MEK                     |
| 1421297_a_at       | Cacna1c       | calcium channel. voltage-dependent. L type. alpha 1C subunit           | -6.82          | 0.00           | 0.43          | BRAF; MEK                     |
| 1417719_at         | Sap30         | sin3 associated polypeptide                                            | -6.84          | 0.00           | 0.38          | BRAF; MEK                     |
| 1429171_a_at       | Ncapg         | on-SMC condensin I complex. subunit G                                  | -6.84          | 0.00           | 0.19          | BRAF; MEK                     |
| 1437643_at         | Cenj          | centromere protein J                                                   | -6.84          | 0.00           | 0.34          | BRAF; MEK                     |
| 1451021_a_at       | Klf5          | Kruppel-like factor 5                                                  | -6.86          | 0.00           | 0.21          | BRAF; MEK                     |
| 1459679_s_at       | Myo1b         | myosin IB                                                              | -6.86          | 0.00           | 0.33          | BRAF; MEK                     |
| 1456523_at         | 100039239     | predicted gene. 100039239                                              | -6.86          | 0.00           | 0.27          | BRAF                          |
| 1426865_a_at       | Ncam1         | neural cell adhesion molecule 1                                        | -6.86          | 0.00           | 0.35          | BRAF; MEK                     |
| 1452947_at         | Gprc5c        | G protein-coupled receptor. family C. group 5. member C                | -6.87          | 0.00           | 0.46          |                               |
| 1424046_at         | Bub1          | budding uninhibited by benzimidazoles 1 homolog (S. cerevisiae)        | -6.87          | 0.00           | 0.21          | BRAF; MEK                     |
| 1416575_at         | Cdc45l        | cell division cycle 45 homolog (S. cerevisiae)-like                    | -6.88          | 0.00           | 0.34          | BRAF; MEK                     |
| 1416043_at         | Nasp          | nuclear autoantigenic sperm protein (histone-binding)                  | -6.90          | 0.00           | 0.30          |                               |
| 1451411_at         | Gprc5b        | G protein-coupled receptor. family C. group 5. member B                | -6.91          | 0.00           | 0.62          | BRAF; MEK                     |
| 1427105_at         | Cenpn         | centromere protein N                                                   | -6.91          | 0.00           | 0.53          | BRAF; MEK                     |
| 1422864_at         | Runx1         | runt related transcription factor 1                                    | -6.91          | 0.00           | 0.46          | BRAF; MEK                     |
| 1434748_at         | Ckap2         | cytoskeleton associated protein 2                                      | -6.91          | 0.00           | 0.33          | BRAF; MEK                     |
| 1453314_x_at       | 2610039C10Rik | RIKEN cDNA 2610039C10 gene                                             | -6.93          | 0.00           | 0.49          | BRAF; MEK                     |
| 1437186_at         | BC055324      | cDNA sequence BC055324                                                 | -6.93          | 0.00           | 0.38          | BRAF; MEK                     |
| 1438320_s_at       | Mcm7          | minichromosome maintenance deficient 7 (S. cerevisiae)                 | -6.94          | 0.00           | 0.26          | BRAF; MEK                     |
| 1432188_s_at       | Nup43         | nucleoporin 43                                                         | -6.94          | 0.00           | 0.51          | BRAF; MEK                     |
| 1422482_at         | Ruvbl2        | RuvB-like protein 2                                                    | -6.94          | 0.00           | 0.53          | BRAF; MEK                     |
| 1423312_at         | Tpbg          | trophoblast glycoprotein                                               | -6.95          | 0.00           | 0.51          | BRAF; MEK                     |
| 1416664_at         | Cdc20         | cell division cycle 20 homolog (S. cerevisiae)                         | -6.95          | 0.00           | 0.28          | BRAF; MEK                     |
| 1448113_at         | Stmn1         | stathmin 1                                                             | -6.95          | 0.00           | 0.35          | BRAF; MEK                     |
| 1443381_at         | Etv4          | ets variant gene 4 (E1A enhancer binding protein. E1AF)                | -6.95          | 0.00           | 0.63          | BRAF; MEK                     |
| 1423700_at         | Rfc3          | replication factor C (activator 1) 3                                   | -6.95          | 0.00           | 0.39          | BRAF; MEK                     |
| 1433782_at         | Cldn12        | claudin 12                                                             | -6.96          | 0.00           | 0.49          | BRAF; MEK                     |
| 1424436_at         | Gart          | phosphoribosylglycinamide formyltransferase                            | -6.96          | 0.00           | 0.51          | BRAF; MEK                     |
| 1455304_at         | Unc13c        | unc-13 homolog C (C. elegans)                                          | -6.96          | 0.00           | 0.32          | BRAF; MEK                     |



| <b>Probeset ID</b> | <b>Symbol</b> | <b>Gene Name</b>                                                                   | <b>d-value</b> | <b>q-value</b> | <b>R-fold</b> | <b>Expression reversed by</b> |
|--------------------|---------------|------------------------------------------------------------------------------------|----------------|----------------|---------------|-------------------------------|
| 1424971_at         | Ccdc99        | coiled-coil domain containing 99                                                   | -6.96          | 0.00           | 0.29          | BRAF; MEK                     |
| 1433663_s_at       | AU014645      | expressed sequence AU014645                                                        | -6.97          | 0.00           | 0.70          | BRAF; MEK                     |
| 1423813_at         | Kif22         | kinesin family member 22                                                           | -6.97          | 0.00           | 0.29          | BRAF; MEK                     |
| 1427269_at         | Sfrs11        | splicing factor, arginine/serine-rich 11                                           | -6.97          | 0.00           | 0.58          | BRAF; MEK                     |
| 1423477_at         | Zic1          | zinc finger protein of the cerebellum 1                                            | -6.98          | 0.00           | 0.55          | BRAF; MEK                     |
| 1416065_a_at       | Ankrd10       | ankyrin repeat domain 10                                                           | -6.99          | 0.00           | 0.51          | BRAF; MEK                     |
| 1423884_at         | Cirh1a        | cirrhosis, autosomal recessive 1A (human)                                          | -6.99          | 0.00           | 0.73          | BRAF; MEK                     |
| 1417939_at         | Rad51ap1      | RAD51 associated protein 1                                                         | -6.99          | 0.00           | 0.37          | BRAF                          |
| 1420028_s_at       | Mcm3          | minichromosome maintenance deficient 3 (S. cerevisiae)                             | -6.99          | 0.00           | 0.27          | BRAF; MEK                     |
| 1450129_a_at       | Socs6         | suppressor of cytokine signaling 6                                                 | -7.00          | 0.00           | 0.66          | BRAF; MEK                     |
| 1427161_at         | Cenpf         | centromere protein F                                                               | -7.00          | 0.00           | 0.22          | BRAF; MEK                     |
| 1418827_at         | Thex1         | three prime histone mRNA exonuclease 1                                             | -7.00          | 0.00           | 0.49          | BRAF; MEK                     |
| 1417930_at         | Nab2          | Ngfi-A binding protein 2                                                           | -7.01          | 0.00           | 0.45          | BRAF; MEK                     |
| 1434400_at         | Tgif2         | TGFB-induced factor homeobox 2                                                     | -7.02          | 0.00           | 0.44          | BRAF; MEK                     |
| 1416288_at         | Dnaja1        | DnaJ (Hsp40) homolog, subfamily A, member 1                                        | -7.02          | 0.00           | 0.64          | ; MEK                         |
| 1452314_at         | Kif11         | kinesin family member 11                                                           | -7.03          | 0.00           | 0.23          | BRAF; MEK                     |
| 1429294_at         | Trip13        | thyroid hormone receptor interactor 13                                             | -7.05          | 0.00           | 0.29          | BRAF; MEK                     |
| 1423920_at         | Ncaph         | non-SMC condensin I complex, subunit H                                             | -7.05          | 0.00           | 0.35          | BRAF; MEK                     |
| 1428968_at         | Cep57         | centrosomal protein 57                                                             | -7.06          | 0.00           | 0.64          | BRAF; MEK                     |
| 1437716_x_at       | Kif22         | kinesin family member 22                                                           | -7.07          | 0.00           | 0.33          | BRAF; MEK                     |
| 1455682_at         | Abl2          | v-abl Abelson murine leukemia viral oncogene homolog 2 (arg. Abelson-related gene) | -7.07          | 0.00           | 0.48          | BRAF; MEK                     |
| 1418369_at         | Prim1         | DNA primase, p49 subunit                                                           | -7.09          | 0.00           | 0.27          | BRAF; MEK                     |
| 1457044_at         | 4732474O15Rik | RIKEN cDNA 4732474O15 gene                                                         | -7.09          | 0.00           | 0.41          |                               |
| 1436942_at         | A930035D04Rik | RIKEN cDNA A930035D04 gene                                                         | -7.10          | 0.00           | 0.47          | BRAF; MEK                     |
| 1427321_s_at       | Cxadr         | coxsackievirus and adenovirus receptor                                             | -7.10          | 0.00           | 0.42          | BRAF; MEK                     |
| 1416258_at         | Tk1           | thymidine kinase 1                                                                 | -7.10          | 0.00           | 0.23          | BRAF; MEK                     |
| 1448635_at         | Smc2          | structural maintenance of chromosomes 2                                            | -7.11          | 0.00           | 0.24          | BRAF; MEK                     |
| 1432013_a_at       | 2610016C23Rik | RIKEN cDNA 2610016C23 gene                                                         | -7.11          | 0.00           | 0.47          | BRAF; MEK                     |
| 1415857_at         | Emb           | embigin                                                                            | -7.12          | 0.00           | 0.28          | n.r. ;                        |
| 1433696_at         | Hn1l          | hematological and neurological expressed 1-like                                    | -7.12          | 0.00           | 0.46          | BRAF; MEK                     |
| 1430139_at         | Hells         | helicase, lymphoid specific                                                        | -7.13          | 0.00           | 0.48          | BRAF; MEK                     |
| 1428069_at         | Cdca7         | cell division cycle associated 7                                                   | -7.13          | 0.00           | 0.27          | BRAF; MEK                     |
| 1451770_s_at       | Dhx9          | DEAH (Asp-Glu-Ala-His) box polypeptide 9                                           | -7.14          | 0.00           | 0.58          | BRAF; MEK                     |
| 1452240_at         | Bruno4        | bruno-like 4, RNA binding protein (Drosophila)                                     | -7.15          | 0.00           | 0.45          | BRAF; MEK                     |
| 1428713_s_at       | Gins2         | GINS complex subunit 2 (Psf2 homolog)                                              | -7.16          | 0.00           | 0.49          | BRAF; MEK                     |
| 1428304_at         | Esco2         | establishment of cohesion 1 homolog 2 (S. cerevisiae)                              | -7.17          | 0.00           | 0.24          | BRAF; MEK                     |
| 1450986_at         | Nol5          | nucleolar protein 5                                                                | -7.17          | 0.00           | 0.36          | BRAF; MEK                     |
| 1417019_a_at       | Cdc6          | cell division cycle 6 homolog (S. cerevisiae)                                      | -7.17          | 0.00           | 0.20          | BRAF; MEK                     |
| 1452151_at         | Gramd4        | GRAM domain containing 4                                                           | -7.17          | 0.00           | 0.51          | BRAF; MEK                     |
| 1454011_a_at       | Rpa2          | replication protein A2                                                             | -7.17          | 0.00           | 0.42          | BRAF; MEK                     |
| 1440831_at         | Bach1         | BTB and CNC homology 1                                                             | -7.17          | 0.00           | 0.70          | ; MEK                         |
| 1453490_at         | Sass6         | spindle assembly 6 homolog (C. elegans)                                            | -7.18          | 0.00           | 0.60          | BRAF; MEK                     |
| 1453064_at         | Etaa1         | Ewing's tumor-associated antigen 1                                                 | -7.18          | 0.00           | 0.37          | BRAF; MEK                     |
| 1416073_a_at       | Pcnt          | pericentrin (kendrin)                                                              | -7.18          | 0.00           | 0.54          | BRAF; MEK                     |
| 1457404_at         | Nfkbiz        | nuclear factor of kappa light polypeptide gene enhancer in B-cells inhibitor, zeta | -7.18          | 0.00           | 0.24          | BRAF; MEK                     |
| 1426471_at         | Zfp52         | zinc finger protein 52                                                             | -7.19          | 0.00           | 0.41          | ; MEK                         |
| 1433751_at         | Slc39a10      | solute carrier family 39 (zinc transporter), member 10                             | -7.19          | 0.00           | 0.40          | BRAF; MEK                     |
| 1425179_at         | Shmt1         | serine hydroxymethyltransferase 1 (soluble)                                        | -7.20          | 0.00           | 0.33          | BRAF; MEK                     |
| 1434225_at         | Swap70        | SWA-70 protein                                                                     | -7.20          | 0.00           | 0.61          |                               |
| 1427911_at         | Tmem173       | transmembrane protein 173                                                          | -7.21          | 0.00           | 0.51          | BRAF; MEK                     |
| 1422935_x_at       | Cbx1          | chromobox homolog 1 (Drosophila HP1 beta)                                          | -7.21          | 0.00           | 0.62          | BRAF; MEK                     |
| 1423531_a_at       | Hnmpa1        | heterogeneous nuclear ribonucleoprotein A1                                         | -7.21          | 0.00           | 0.34          | BRAF; MEK                     |
| 1452036_a_at       | Tmpo          | thymopoietin                                                                       | -7.22          | 0.00           | 0.29          | BRAF; MEK                     |
| 1419574_at         | Zfp292        | zinc finger protein 292                                                            | -7.24          | 0.00           | 0.57          | ; MEK                         |
| 1459546_s_at       | Enpp1         | ectonucleotide pyrophosphatase/phosphodiesterase 1                                 | -7.24          | 0.00           | 0.63          | BRAF; MEK                     |

| <b>Probeset ID</b> | <b>Symbol</b> | <b>Gene Name</b>                                                                                  | <b>d-value</b> | <b>q-value</b> | <b>R-fold</b> | <b>Expression reversed by</b> |
|--------------------|---------------|---------------------------------------------------------------------------------------------------|----------------|----------------|---------------|-------------------------------|
| 1441997_at         | Zfp184        | zinc finger protein 184 (Kruppel-like)                                                            | -7.24          | 0.00           | 0.56          | BRAF; MEK                     |
| 1451128_s_at       | Kif22         | kinesin family member 22                                                                          | -7.24          | 0.00           | 0.26          | BRAF; MEK                     |
| 1456326_at         | Gm784         | gene model 784. (NCBI)                                                                            | -7.24          | 0.00           | 0.25          | BRAF; MEK                     |
| 1431921_a_at       | Stag1         | stromal antigen 1                                                                                 | -7.25          | 0.00           | 0.61          | BRAF; MEK                     |
| 1449061_a_at       | Prim1         | DNA primase. p49 subunit                                                                          | -7.25          | 0.00           | 0.25          | BRAF; MEK                     |
| 1425815_a_at       | Hmmr          | hyaluronan mediated motility receptor (RHAMM)                                                     | -7.26          | 0.00           | 0.31          | BRAF; MEK                     |
| 1455488_at         | 6230416J20Rik | RIKEN cDNA 6230416J20 gene                                                                        | -7.26          | 0.00           | 0.31          | BRAF; MEK                     |
| 1448943_at         | Nrp1          | neuropilin 1                                                                                      | -7.26          | 0.00           | 0.32          | BRAF; MEK                     |
| 1436309_at         | Neto2         | neuropilin (NRP) and tolloid (TLL)-like 2                                                         | -7.26          | 0.00           | 0.39          | BRAF; MEK                     |
| 1423675_at         | Usp1          | ubiquitin specific peptdiase 1                                                                    | -7.28          | 0.00           | 0.37          | BRAF; MEK                     |
| 1417454_at         | Cul4b         | cullin 4B                                                                                         | -7.31          | 0.00           | 0.58          | ; MEK                         |
| 1458385_at         | Hspa4l        | heat shock protein 4 like                                                                         | -7.31          | 0.00           | 0.43          | ; MEK                         |
| 1453722_s_at       | LOC100048559  | similar to splicing factor. arginine/serine-rich 1 (splicing factor 2. alternate splicing factor) | -7.31          | 0.00           | 0.50          | BRAF; MEK                     |
| 1424278_a_at       | Birc5         | baculoviral IAP repeat-containing 5                                                               | -7.32          | 0.00           | 0.25          | BRAF; MEK                     |
| 1448205_at         | Ccnb1-rs1     | cyclin B1. related sequence 1                                                                     | -7.33          | 0.00           | 0.29          | BRAF; MEK                     |
| 1439394_x_at       | Cdc20         | cell division cycle 20 homolog (S. cerevisiae)                                                    | -7.33          | 0.00           | 0.42          | BRAF; MEK                     |
| 1440227_at         | Slc5a3        | solute carrier family 5 (inositol transporters). member 3                                         | -7.33          | 0.00           | 0.31          | BRAF; MEK                     |
| 1460353_at         | Tmem48        | transmembrane protein 48                                                                          | -7.33          | 0.00           | 0.59          | BRAF; MEK                     |
| 1421819_a_at       | Set           | SET translocation                                                                                 | -7.34          | 0.00           | 0.44          | BRAF; MEK                     |
| 1427682_a_at       | Egr2          | early growth response 2                                                                           | -7.34          | 0.00           | 0.22          | BRAF; MEK                     |
| 1434607_at         | Ddx52         | DEAD (Asp-Glu-Ala-Asp) box polypeptide 52                                                         | -7.34          | 0.00           | 0.67          | BRAF; MEK                     |
| 1429295_s_at       | Trip13        | thyroid hormone receptor interactor 13                                                            | -7.35          | 0.00           | 0.23          | BRAF; MEK                     |
| 1450780_s_at       | Hmga2         | high mobility group AT-hook 2                                                                     | -7.35          | 0.00           | 0.31          | BRAF; MEK                     |
| 1427971_at         | Cdc73         | cell division cycle 73. Paf1/RNA polymerase II complex component. homolog (S. cerevisiae)         | -7.36          | 0.00           | 0.70          |                               |
| 1426854_a_at       | LOC100047898  | similar to protein phosphatase 2A inhibitor-2 I-2PP2A                                             | -7.36          | 0.00           | 0.57          | BRAF; MEK                     |
| 1436512_at         | Arl4c         | ADP-ribosylation factor-like 4C                                                                   | -7.36          | 0.00           | 0.32          | BRAF; MEK                     |
| 1436707_x_at       | Ncaph         | non-SMC condensin I complex. subunit H                                                            | -7.37          | 0.00           | 0.32          | BRAF; MEK                     |
| 1416558_at         | Melk          | maternal embryonic leucine zipper kinase                                                          | -7.38          | 0.00           | 0.23          | BRAF; MEK                     |
| 1422673_at         | Prkd1         | protein kinase D1                                                                                 | -7.38          | 0.00           | 0.52          | BRAF; MEK                     |
| 1418628_at         | Khdrbs1       | KH domain containing. RNA binding. signal transduction associated 1                               | -7.40          | 0.00           | 0.58          | BRAF; MEK                     |
| 1434437_x_at       | Rrm2          | ribonucleotide reductase M2                                                                       | -7.44          | 0.00           | 0.29          | BRAF; MEK                     |
| 1451246_s_at       | Aurkb         | aurora kinase B                                                                                   | -7.44          | 0.00           | 0.28          | BRAF; MEK                     |
| 1415850_at         | Rasa3         | RAS p21 protein activator 3                                                                       | -7.45          | 0.00           | 0.35          | BRAF; MEK                     |
| 1423310_at         | Tpbp          | trophoblast glycoprotein                                                                          | -7.45          | 0.00           | 0.32          | BRAF; MEK                     |
| 1429227_x_at       | Nap111        | nucleosome assembly protein 1-like 1                                                              | -7.45          | 0.00           | 0.60          | BRAF; MEK                     |
| 1437287_at         | 1110020G09Rik | RIKEN cDNA 1110020G09 gene                                                                        | -7.45          | 0.00           | 0.49          | BRAF; MEK                     |
| 1428061_at         | Hat1          | histone aminotransferase 1                                                                        | -7.46          | 0.00           | 0.36          | BRAF; MEK                     |
| 1418539_a_at       | Ptpre         | protein tyrosine phosphatase. receptor type. E                                                    | -7.46          | 0.00           | 0.39          | BRAF; MEK                     |
| 1434468_at         | Otud4         | OTU domain containing 4                                                                           | -7.47          | 0.00           | 0.47          | BRAF; MEK                     |
| 1448989_a_at       | Myo1b         | myosin IB                                                                                         | -7.48          | 0.00           | 0.41          | BRAF; MEK                     |
| 1452598_at         | Gins1         | GINS complex subunit 1 (Psf1 homolog)                                                             | -7.48          | 0.00           | 0.27          | BRAF; MEK                     |
| 1429372_at         | Sox11         | SRY-box containing gene 11                                                                        | -7.49          | 0.00           | 0.37          | ; MEK                         |
| 1429527_a_at       | Plscr1        | phospholipid scramblase 1                                                                         | -7.49          | 0.00           | 0.29          | BRAF; MEK                     |
| 1416214_at         | Mcm4          | minichromosome maintenance deficient 4 homolog (S. cerevisiae)                                    | -7.49          | 0.00           | 0.28          | BRAF; MEK                     |
| 1442095_at         | Asxl3         | additional sex combs like 3 (Drosophila)                                                          | -7.50          | 0.00           | 0.38          | BRAF; MEK                     |
| 1449699_s_at       | C330027C09Rik | RIKEN cDNA C330027C09 gene                                                                        | -7.51          | 0.00           | 0.24          | BRAF; MEK                     |
| 1416698_a_at       | Cks1b         | CDC28 protein kinase 1b                                                                           | -7.52          | 0.00           | 0.55          | BRAF; MEK                     |
| 1417821_at         | D17H6S56E-5   | DNA segment. Chr 17. human D6S56E 5                                                               | -7.53          | 0.00           | 0.20          | BRAF; MEK                     |
| 1426698_a_at       | Hnmpm         | heterogeneous nuclear ribonucleoprotein M                                                         | -7.54          | 0.00           | 0.48          | BRAF; MEK                     |
| 1424113_at         | Lamb1-1       | laminin B1 subunit 1                                                                              | -7.54          | 0.00           | 0.34          | BRAF; MEK                     |
| 1428176_at         | S1pr2         | sphingosine-1-phosphate receptor 2                                                                | -7.54          | 0.00           | 0.52          | BRAF; MEK                     |
| 1448931_at         | F2r1          | coagulation factor II (thrombin) receptor-like 1                                                  | -7.54          | 0.00           | 0.31          | BRAF; MEK                     |
| 1422851_at         | Hmga2         | high mobility group AT-hook 2                                                                     | -7.55          | 0.00           | 0.29          | BRAF; MEK                     |
| 1425718_a_at       | Ivns1abp      | influenza virus NS1A binding protein                                                              | -7.55          | 0.00           | 0.41          | ; MEK                         |
| 1415971_at         | Marcks        | myristoylated alanine rich protein kinase C substrate                                             | -7.57          | 0.00           | 0.58          | BRAF; MEK                     |

| <b>Probeset ID</b> | <b>Symbol</b> | <b>Gene Name</b>                                                                                  | <b>d-value</b> | <b>q-value</b> | <b>R-fold</b> | <b>Expression reversed by</b> |
|--------------------|---------------|---------------------------------------------------------------------------------------------------|----------------|----------------|---------------|-------------------------------|
| 1450004_at         | Tslp          | thymic stromal lymphopoietin                                                                      | -7.58          | 0.00           | 0.29          | ; MEK                         |
| 1435892_at         | Asxl3         | additional sex combs like 3 (Drosophila)                                                          | -7.59          | 0.00           | 0.43          | BRAF; MEK                     |
| 1429304_at         | Ankrd10       | ankyrin repeat domain 10                                                                          | -7.59          | 0.00           | 0.53          | BRAF; MEK                     |
| 1426994_at         | Phlpp         | PH domain and leucine rich repeat protein phosphatase                                             | -7.59          | 0.00           | 0.48          | BRAF                          |
| 1453106_a_at       | Rnmt          | RNA (guanine-7-) methyltransferase                                                                | -7.59          | 0.00           | 0.68          | BRAF; MEK                     |
| 1428262_s_at       | Hnmpa3        | heterogeneous nuclear ribonucleoprotein A3                                                        | -7.60          | 0.00           | 0.63          | ; MEK                         |
| 1418828_at         | Thex1         | three prime histone mRNA exonuclease 1                                                            | -7.60          | 0.00           | 0.37          | BRAF; MEK                     |
| 1455105_at         | Ptpn12        | protein tyrosine phosphatase. non-receptor type 12                                                | -7.61          | 0.00           | 0.66          | ; MEK                         |
| 1425241_a_at       | Wsb1          | WD repeat and SOCS box-containing 1                                                               | -7.61          | 0.00           | 0.53          | BRAF; MEK                     |
| 1426377_at         | Zfp281        | zinc finger protein 281                                                                           | -7.63          | 0.00           | 0.57          | ; MEK                         |
| 1424206_at         | Smarca5       | SWI/SNF related. matrix associated. actin dependent regulator of chromatin. subfamily a. member 5 | -7.63          | 0.00           | 0.52          | BRAF; MEK                     |
| 1441788_s_at       | Dkc1          | dyskeratosis congenita 1. dyskerin homolog (human)                                                | -7.63          | 0.00           | 0.29          | BRAF; MEK                     |
| 1426426_at         | Mak16         | MAK16 homolog (S. cerevisiae)                                                                     | -7.64          | 0.00           | 0.66          | BRAF                          |
| 1435888_at         | Egfr          | epidermal growth factor receptor                                                                  | -7.65          | 0.00           | 0.32          | ; MEK                         |
| 1435143_at         | Elk3          | ELK3. member of ETS oncogene family                                                               | -7.65          | 0.00           | 0.58          | BRAF; MEK                     |
| 1423847_at         | Ncapd2        | non-SMC condensin I complex. subunit D2                                                           | -7.66          | 0.00           | 0.26          | BRAF; MEK                     |
| 1458374_at         | C79407        | expressed sequence C79407                                                                         | -7.66          | 0.00           | 0.30          | BRAF; MEK                     |
| 1427683_at         | Egr2          | early growth response 2                                                                           | -7.66          | 0.00           | 0.16          | BRAF; MEK                     |
| 1429665_at         | 6230416J20Rik | RIKEN cDNA 6230416J20 gene                                                                        | -7.67          | 0.00           | 0.49          | BRAF; MEK                     |
| 1430640_a_at       | Prkar2b       | protein kinase. cAMP dependent regulatory. type II beta                                           | -7.68          | 0.00           | 0.22          | BRAF; MEK                     |
| 1424251_a_at       | Hnrpd1        | heterogeneous nuclear ribonucleoprotein D-like                                                    | -7.68          | 0.00           | 0.58          | BRAF; MEK                     |
| 1455803_at         | Sico4a1       | solute carrier organic anion transporter family. member 4a1                                       | -7.69          | 0.00           | 0.18          | BRAF; MEK                     |
| 1435753_a_at       | Nucks1        | nuclear casein kinase and cyclin-dependent kinase substrate 1                                     | -7.69          | 0.00           | 0.56          | ; MEK                         |
| 1422430_at         | Figl1         | fidgetin-like 1                                                                                   | -7.69          | 0.00           | 0.27          | BRAF; MEK                     |
| 1416145_at         | Dhx15         | DEAH (Asp-Glu-Ala-His) box polypeptide 15                                                         | -7.71          | 0.00           | 0.65          | BRAF; MEK                     |
| 1415697_at         | G3bp2         | GTPase activating protein (SH3 domain) binding protein 2                                          | -7.72          | 0.00           | 0.55          | BRAF; MEK                     |
| 1449799_s_at       | Pkp2          | plakophilin 2                                                                                     | -7.75          | 0.00           | 0.40          | ; n.r.                        |
| 1448990_a_at       | Myo1b         | myosin IB                                                                                         | -7.75          | 0.00           | 0.36          | BRAF; MEK                     |
| 1423714_at         | Asf1b         | ASF1 anti-silencing function 1 homolog B (S. cerevisiae)                                          | -7.76          | 0.00           | 0.39          | BRAF; MEK                     |
| 1437495_at         | Mbtps2        | membrane-bound transcription factor peptidase. site 2                                             | -7.76          | 0.00           | 0.42          | BRAF; MEK                     |
| 1420916_at         | Prp40a        | PRP40 pre-mRNA processing factor 40 homolog A (yeast)                                             | -7.77          | 0.00           | 0.65          | ; MEK                         |
| 1423401_at         | Etv6          | ets variant gene 6 (TEL oncogene)                                                                 | -7.78          | 0.00           | 0.50          | BRAF; n.r.                    |
| 1451105_at         | Vash2         | vasohibin 2                                                                                       | -7.79          | 0.00           | 0.30          | BRAF; MEK                     |
| 1424144_at         | Cdt1          | chromatin licensing and DNA replication factor 1                                                  | -7.79          | 0.00           | 0.21          | BRAF; MEK                     |
| 1448466_at         | Cdca5         | cell division cycle associated 5                                                                  | -7.81          | 0.00           | 0.33          | BRAF; MEK                     |
| 1416155_at         | Hmgb3         | high mobility group box 3                                                                         | -7.81          | 0.00           | 0.33          | BRAF; MEK                     |
| 1433580_at         | Nup54         | nucleoporin 54                                                                                    | -7.81          | 0.00           | 0.65          | BRAF; MEK                     |
| 1429368_at         | Lrig3         | leucine-rich repeats and immunoglobulin-like domains 3                                            | -7.81          | 0.00           | 0.70          | n.r. ; MEK                    |
| 1423232_at         | Etv4          | ets variant gene 4 (E1A enhancer binding protein. E1AF)                                           | -7.81          | 0.00           | 0.31          | BRAF; MEK                     |
| 1418253_a_at       | Hspa4l        | heat shock protein 4 like                                                                         | -7.84          | 0.00           | 0.43          | BRAF; MEK                     |
| 1426830_a_at       | Ahcy1l        | S-adenosylhomocysteine hydrolase-like 1                                                           | -7.84          | 0.00           | 0.69          | n.r. ; MEK                    |
| 1450886_at         | Gsg2          | germ cell-specific gene 2                                                                         | -7.84          | 0.00           | 0.25          | BRAF; MEK                     |
| 1430088_at         | Zfp619        | zinc finger protein 619                                                                           | -7.85          | 0.00           | 0.71          |                               |
| 1423521_at         | Lmnb1         | lamin B1                                                                                          | -7.87          | 0.00           | 0.38          | BRAF; MEK                     |
| 1418281_at         | Rad51         | RAD51 homolog (S. cerevisiae)                                                                     | -7.89          | 0.00           | 0.28          | BRAF; MEK                     |
| 1448441_at         | Cks1b         | CDC28 protein kinase 1b                                                                           | -7.89          | 0.00           | 0.43          | BRAF; MEK                     |
| 1455655_a_at       | Tardbp        | TAR DNA binding protein                                                                           | -7.90          | 0.00           | 0.54          |                               |
| 1455580_at         | Usp6nl        | USP6 N-terminal like                                                                              | -7.90          | 0.00           | 0.67          | BRAF; MEK                     |
| 1439695_a_at       | Kif20b        | kinesin family member 20B                                                                         | -7.90          | 0.00           | 0.18          | BRAF; MEK                     |
| 1434025_at         | NA            | NA                                                                                                | -7.92          | 0.00           | 0.16          | BRAF; MEK                     |
| 1415775_at         | Rbbp7         | retinoblastoma binding protein 7                                                                  | -7.93          | 0.00           | 0.62          | BRAF; MEK                     |
| 1456130_at         | LOC553091     | hypothetical LOC553091                                                                            | -7.94          | 0.00           | 0.33          | BRAF; MEK                     |
| 1415852_at         | Impdh2        | inosine 5'-phosphate dehydrogenase 2                                                              | -7.95          | 0.00           | 0.55          | BRAF; MEK                     |
| 1416280_at         | Uba2          | ubiquitin-like modifier activating enzyme 2                                                       | -7.95          | 0.00           | 0.65          | BRAF; MEK                     |
| 1423683_at         | Cdca4         | cell division cycle associated 4                                                                  | -7.96          | 0.00           | 0.49          | BRAF; MEK                     |

| <b>Probeset ID</b> | <b>Symbol</b> | <b>Gene Name</b>                                                                         | <b>d-value</b> | <b>q-value</b> | <b>R-fold</b> | <b>Expression reversed by</b> |
|--------------------|---------------|------------------------------------------------------------------------------------------|----------------|----------------|---------------|-------------------------------|
| 1439377_x_at       | Cdc20         | cell division cycle 20 homolog (S. cerevisiae)                                           | -7.97          | 0.00           | 0.27          | BRAF; MEK                     |
| 1451415_at         | 1810011O10Rik | RIKEN cDNA 1810011O10 gene                                                               | -7.98          | 0.00           | 0.18          | BRAF; MEK                     |
| 1448182_a_at       | Cd24a         | CD24a antigen                                                                            | -7.99          | 0.00           | 0.29          | BRAF; MEK                     |
| 1450053_at         | Kif2a         | kinesin family member 2A                                                                 | -8.01          | 0.00           | 0.52          | BRAF; MEK                     |
| 1426363_x_at       | H2afy2        | H2A histone family. member Y2                                                            | -8.02          | 0.00           | 0.53          | BRAF; MEK                     |
| 1453422_a_at       | 1110020G09Rik | RIKEN cDNA 1110020G09 gene                                                               | -8.03          | 0.00           | 0.51          | BRAF; MEK                     |
| 1429051_s_at       | Sox11         | SRY-box containing gene 11                                                               | -8.03          | 0.00           | 0.38          | BRAF; MEK                     |
| 1427192_a_at       | Brd8          | bromodomain containing 8                                                                 | -8.04          | 0.00           | 0.58          | BRAF; MEK                     |
| 1416802_a_at       | Cdca5         | cell division cycle associated 5                                                         | -8.05          | 0.00           | 0.26          | BRAF; MEK                     |
| 1428483_a_at       | 2610039C10Rik | RIKEN cDNA 2610039C10 gene                                                               | -8.06          | 0.00           | 0.47          | BRAF; MEK                     |
| 1418674_at         | Osmr          | oncostatin M receptor                                                                    | -8.07          | 0.00           | 0.25          | BRAF; MEK                     |
| 1451323_at         | Zfp7          | zinc finger protein 7                                                                    | -8.07          | 0.00           | 0.32          | BRAF; MEK                     |
| 1434880_at         | Etv6          | ets variant gene 6 (TEL oncogene)                                                        | -8.08          | 0.00           | 0.55          | BRAF; MEK                     |
| 1415860_at         | Kpna2         | karyopherin (importin) alpha 2                                                           | -8.09          | 0.00           | 0.57          | BRAF; MEK                     |
| 1416129_at         | Errfi1        | ERBB receptor feedback inhibitor 1                                                       | -8.09          | 0.00           | 0.49          | BRAF; MEK                     |
| 1452242_at         | Cep55         | centrosomal protein 55                                                                   | -8.10          | 0.00           | 0.23          | BRAF; MEK                     |
| 1448314_at         | Cdc2a         | cell division cycle 2 homolog A (S. pombe)                                               | -8.10          | 0.00           | 0.32 *        | BRAF; MEK                     |
| 1418678_at         | Has2          | hyaluronan synthase 2                                                                    | -8.11          | 0.00           | 0.06          | BRAF; MEK                     |
| 1438368_a_at       | Matr3         | matrin 3                                                                                 | -8.15          | 0.00           | 0.61          | ; MEK                         |
| 1423684_at         | Hnmpk         | heterogeneous nuclear ribonucleoprotein K                                                | -8.16          | 0.00           | 0.72          | BRAF                          |
| 1423324_at         | Pnn           | pinin                                                                                    | -8.16          | 0.00           | 0.53          | ; MEK                         |
| 1428168_at         | Mpzl1         | myelin protein zero-like 1                                                               | -8.17          | 0.00           | 0.62          | BRAF; MEK                     |
| 1449169_at         | Has2          | hyaluronan synthase 2                                                                    | -8.18          | 0.00           | 0.08          | BRAF; MEK                     |
| 1448728_a_at       | Nfkbiz        | nuclear factor of kappa light polypeptide gene enhancer in B-cells inhibitor. zeta       | -8.20          | 0.00           | 0.38          | BRAF; MEK                     |
| 1424143_a_at       | Cdt1          | chromatin licensing and DNA replication factor 1                                         | -8.20          | 0.00           | 0.23          | BRAF; MEK                     |
| 1448476_at         | Nap114        | nucleosome assembly protein 1-like 4                                                     | -8.21          | 0.00           | 0.73          | BRAF; MEK                     |
| 1417541_at         | Hells         | helicase. lymphoid specific                                                              | -8.26          | 0.00           | 0.20          | BRAF; MEK                     |
| 1438277_at         | E130308A19Rik | RIKEN cDNA E130308A19 gene                                                               | -8.28          | 0.00           | 0.68          | ; MEK                         |
| 1428100_at         | Sfrs1         | splicing factor. arginine/serine-rich 1 (ASF/SF2)                                        | -8.28          | 0.00           | 0.52          | BRAF; MEK                     |
| 1423796_at         | Sfpq          | splicing factor proline/glutamine rich (polypyrimidine tract binding protein associated) | -8.29          | 0.00           | 0.54          | BRAF; MEK                     |
| 1434809_at         | Arhgap28      | Rho GTPase activating protein 28                                                         | -8.29          | 0.00           | 0.27          | BRAF; MEK                     |
| 1417618_at         | Itih2         | inter-alpha trypsin inhibitor. heavy chain 2                                             | -8.30          | 0.00           | 0.37          | BRAF; MEK                     |
| 1427450_x_at       | Myo1b         | myosin IB                                                                                | -8.30          | 0.00           | 0.40          | BRAF; MEK                     |
| 1448199_at         | Ankrd10       | ankyrin repeat domain 10                                                                 | -8.30          | 0.00           | 0.49          | BRAF; MEK                     |
| 1419645_at         | Cstf2         | cleavage stimulation factor. 3' pre-RNA subunit 2                                        | -8.31          | 0.00           | 0.50          | BRAF; MEK                     |
| 1433567_at         | Gmps          | guanine monphosphate synthetase                                                          | -8.32          | 0.00           | 0.57          | BRAF; MEK                     |
| 1422849_a_at       | Pabpn1        | poly? binding protein. nuclear 1                                                         | -8.33          | 0.00           | 0.61          | BRAF; MEK                     |
| 1423520_at         | Lmnb1         | lamin B1                                                                                 | -8.37          | 0.00           | 0.22          | BRAF; MEK                     |
| 1423474_at         | Top1          | topoisomerase (DNA) I                                                                    | -8.39          | 0.00           | 0.67          | BRAF; MEK                     |
| 1423369_at         | Fmr1          | fragile X mental retardation syndrome 1 homolog                                          | -8.41          | 0.00           | 0.36          | ; MEK                         |
| 1423723_s_at       | Tardbp        | TAR DNA binding protein                                                                  | -8.44          | 0.00           | 0.46          | BRAF; MEK                     |
| 1447585_s_at       | Slc5a3        | solute carrier family 5 (inositol transporters). member 3                                | -8.49          | 0.00           | 0.41          | BRAF; MEK                     |
| 1437502_x_at       | Cd24a         | CD24a antigen                                                                            | -8.51          | 0.00           | 0.29          | BRAF; MEK                     |
| 1417323_at         | Psrc1         | proline/serine-rich coiled-coil 1                                                        | -8.53          | 0.00           | 0.49          | BRAF; n.r.                    |
| 1439040_at         | Cenpe         | centromere protein E                                                                     | -8.57          | 0.00           | 0.27          | BRAF; MEK                     |
| 1449039_a_at       | Hnrpd         | heterogeneous nuclear ribonucleoprotein D-like                                           | -8.60          | 0.00           | 0.51          | BRAF; MEK                     |
| 1429499_at         | Fbxo5         | F-box protein 5                                                                          | -8.61          | 0.00           | 0.15          | BRAF; MEK                     |
| 1428142_at         | Etv5          | ets variant gene 5                                                                       | -8.63          | 0.00           | 0.36          | BRAF; MEK                     |
| 1416433_at         | Rpa2          | replication protein A2                                                                   | -8.66          | 0.00           | 0.41          | BRAF; MEK                     |
| 1440007_at         | D930003E18Rik | RIKEN cDNA D930003E18 gene                                                               | -8.71          | 0.00           | 0.32          |                               |
| 1439436_x_at       | Incnp         | inner centromere protein                                                                 | -8.72          | 0.00           | 0.30          | BRAF; MEK                     |
| 1423982_at         | Fusip1        | FUS interacting protein (serine-arginine rich) 1                                         | -8.73          | 0.00           | 0.52          | ; MEK                         |
| 1438434_at         | Arhgap11a     | Rho GTPase activating protein 11A                                                        | -8.77          | 0.00           | 0.31          | BRAF; MEK                     |
| 1436387_at         | C330006P03Rik | RIKEN cDNA C330006P03 gene                                                               | -8.79          | 0.00           | 0.41          | BRAF; MEK                     |
| 1422243_at         | Fgf7          | fibroblast growth factor 7                                                               | -8.81          | 0.00           | 0.17          | BRAF; MEK                     |

| <b>Probeset ID</b> | <b>Symbol</b>     | <b>Gene Name</b>                                                                   | <b>d-value</b> | <b>q-value</b> | <b>R-fold</b> | <b>Expression reversed by</b> |
|--------------------|-------------------|------------------------------------------------------------------------------------|----------------|----------------|---------------|-------------------------------|
| 1448791_at         | Snx5              | sorting nexin 5                                                                    | -8.82          | 0.00           | 0.62          | BRAF; MEK                     |
| 1450950_at         | Smc3              | structural maintenace of chromosomes 3                                             | -8.85          | 0.00           | 0.51          | BRAF; MEK                     |
| 1417646_a_at       | Snx5              | sorting nexin 5                                                                    | -8.89          | 0.00           | 0.57          | BRAF; MEK                     |
| 1416950_at         | Tnfaip8           | tumor necrosis factor. alpha-induced protein 8                                     | -8.92          | 0.00           | 0.22          | BRAF; MEK                     |
| 1417822_at         | D17H6S56E-5       | DNA segment. Chr 17. human D6S56E 5                                                | -8.93          | 0.00           | 0.24          | BRAF; MEK                     |
| 1453125_at         | Sox11             | SRY-box containing gene 11                                                         | -8.93          | 0.00           | 0.32          | BRAF; MEK                     |
| 1433807_at         | 6720463M24Rik     | RIKEN cDNA 6720463M24 gene                                                         | -8.94          | 0.00           | 0.35          | BRAF; MEK                     |
| 1449839_at         | Casp3             | caspase 3                                                                          | -8.96          | 0.00           | 0.49          | BRAF; MEK                     |
| 1423758_at         | G3bp2             | GTPase activating protein (SH3 domain) binding protein 2                           | -8.97          | 0.00           | 0.66          | BRAF; MEK                     |
| 1416042_s_at       | Nasp              | nuclear autoantigenic sperm protein (histone-binding)                              | -9.01          | 0.00           | 0.28          | BRAF; MEK                     |
| 1450021_at         | Ubqln2            | ubiquilin 2                                                                        | -9.01          | 0.00           | 0.57          | BRAF; MEK                     |
| 1416299_at         | Shcbp1            | Shc SH2-domain binding protein 1                                                   | -9.04          | 0.00           | 0.23          | BRAF; MEK                     |
| 1423455_at         | ENSMUSG0000068659 | predicted gene. ENSMUSG00000068659                                                 | -9.08          | 0.00           | 0.57          | BRAF; MEK                     |
| 1427129_a_at       | HnmpR             | heterogeneous nuclear ribonucleoprotein R                                          | -9.08          | 0.00           | 0.64          | BRAF; MEK                     |
| 1437313_x_at       | Hmgb2             | high mobility group box 2                                                          | -9.09          | 0.00           | 0.21          | BRAF; MEK                     |
| 1421534_at         | LOC14210          | hypothetical LOC14210                                                              | -9.10          | 0.00           | 0.31          | BRAF; MEK                     |
| 1455990_at         | Kif23             | kinesin family member 23                                                           | -9.11          | 0.00           | 0.25          | BRAF; MEK                     |
| 1434339_at         | Fnbp1l            | formin binding protein 1-like                                                      | -9.16          | 0.00           | 0.36          | BRAF; MEK                     |
| 1456531_x_at       | Prp19             | PRP19/PSO4 pre-mRNA processing factor 19 homolog (S. cerevisiae)                   | -9.20          | 0.00           | 0.59          | BRAF; MEK                     |
| 1434240_at         | 4632434I11Rik     | RIKEN cDNA 4632434I11 gene                                                         | -9.31          | 0.00           | 0.37          | BRAF                          |
| 1428248_at         | Nfx1              | nuclear transcription factor. X-box binding 1                                      | -9.33          | 0.00           | 0.66          | BRAF; MEK                     |
| 1424107_at         | Kif18a            | kinesin family member 18A                                                          | -9.34          | 0.00           | 0.33          | BRAF; MEK                     |
| 1448226_at         | Rrm2              | ribonucleotide reductase M2                                                        | -9.42          | 0.00           | 0.28          | BRAF; MEK                     |
| 1424181_at         | Sept6             | septin 6                                                                           | -9.44          | 0.00           | 0.39          | BRAF; MEK                     |
| 1435306_a_at       | Kif11             | kinesin family member 11                                                           | -9.48          | 0.00           | 0.24          | BRAF; MEK                     |
| 1422016_a_at       | Cenph             | centromere protein H                                                               | -9.51          | 0.00           | 0.28          | BRAF; MEK                     |
| 1426473_at         | Dnajc9            | DnaJ (Hsp40) homolog. subfamily C. member 9                                        | -9.55          | 0.00           | 0.38          | BRAF; MEK                     |
| 1415856_at         | Emb               | embigin                                                                            | -9.72          | 0.00           | 0.25          | n.r. ; MEK                    |
| 1423811_at         | Sf3a3             | splicing factor 3a. subunit 3                                                      | -9.76          | 0.00           | 0.62          | BRAF; MEK                     |
| 1453366_at         | Tdrkh             | tudor and KH domain containing protein                                             | -9.76          | 0.00           | 0.20          | BRAF; MEK                     |
| 1435484_at         | Slc5a3            | solute carrier family 5 (inositol transporters). member 3                          | -9.84          | 0.00           | 0.24          | BRAF; MEK                     |
| 1417483_at         | Nfkbiz            | nuclear factor of kappa light polypeptide gene enhancer in B-cells inhibitor. zeta | -9.84          | 0.00           | 0.21          | BRAF; MEK                     |
| 1453748_a_at       | Kif23             | kinesin family member 23                                                           | -9.89          | 0.00           | 0.22          | BRAF; MEK                     |
| 1460168_at         | Slbp              | stem-loop binding protein                                                          | -10.05         | 0.00           | 0.40          | BRAF; MEK                     |
| 1434258_s_at       | Phactr4           | phosphatase and actin regulator 4                                                  | -10.06         | 0.00           | 0.55          | BRAF; MEK                     |
| 1438016_at         | Dkc1              | dyskeratosis congenita 1. dyskerin homolog (human)                                 | -10.07         | 0.00           | 0.33          | BRAF; MEK                     |
| 1454659_at         | Dctd              | dCMP deaminase                                                                     | -10.16         | 0.00           | 0.34          | BRAF; MEK                     |
| 1435460_at         | Prkg2             | protein kinase. cGMP-dependent. type II                                            | -10.21         | 0.00           | 0.16          | BRAF; MEK                     |
| 1423241_a_at       | Tfdp1             | transcription factor Dp 1                                                          | -10.22         | 0.00           | 0.62          | BRAF; MEK                     |
| 1452534_a_at       | Hmgb2             | high mobility group box 2                                                          | -10.42         | 0.00           | 0.16          | BRAF; MEK                     |
| 1438160_x_at       | Slco4a1           | solute carrier organic anion transporter family. member 4a1                        | -10.44         | 0.00           | 0.11          | BRAF; MEK                     |
| 1423919_at         | BC023882          | cDNA sequence BC023882                                                             | -10.47         | 0.00           | 0.41          | BRAF; MEK                     |
| 1438405_at         | Fgf7              | fibroblast growth factor 7                                                         | -10.53         | 0.00           | 0.15          | BRAF; MEK                     |
| 1417065_at         | Egr1              | early growth response 1                                                            | -10.54         | 0.00           | 0.09          | BRAF; MEK                     |
| 1419276_at         | Enpp1             | ectonucleotide pyrophosphatase/phosphodiesterase 1                                 | -10.74         | 0.00           | 0.30          | ; MEK                         |
| 1424932_at         | Egfr              | epidermal growth factor receptor                                                   | -10.87         | 0.00           | 0.37          |                               |
| 1447621_s_at       | Tmem173           | transmembrane protein 173                                                          | -10.97         | 0.00           | 0.32          | BRAF; MEK                     |
| 1454788_at         | Arl4c             | ADP-ribosylation factor-like 4C                                                    | -11.02         | 0.00           | 0.34          | BRAF; MEK                     |
| 1434660_at         | AlkBh1            | alkB. alkylation repair homolog 1 (E. coli)                                        | -11.02         | 0.00           | 0.63          | BRAF; MEK                     |
| 1442368_at         | Kctd12b           | potassium channel tetramerisation domain containing 12b                            | -11.03         | 0.00           | 0.13          |                               |
| 1424114_s_at       | Lamb1-1           | laminin B1 subunit 1                                                               | -11.11         | 0.00           | 0.38          | BRAF; MEK                     |
| 1437122_at         | Bcl2              | B-cell leukemia/lymphoma 2                                                         | -11.27         | 0.00           | 0.55          | BRAF; MEK                     |
| 1435162_at         | Prkg2             | protein kinase. cGMP-dependent. type II                                            | -11.69         | 0.00           | 0.08          | BRAF; MEK                     |
| 1452661_at         | Tfrc              | transferrin receptor                                                               | -11.84         | 0.00           | 0.19          | BRAF; MEK                     |
| 1436329_at         | Egr3              | early growth response 3                                                            | -12.14         | 0.00           | 0.14          | BRAF; MEK                     |



| <b>Probeset ID</b> | <b>Symbol</b> | <b>Gene Name</b>                                                             | <b>d-value</b> | <b>q-value</b> | <b>R-fold</b> | <b>Expression reversed by</b> |
|--------------------|---------------|------------------------------------------------------------------------------|----------------|----------------|---------------|-------------------------------|
| 1417155_at         | Mycn          | v-myc myelocytomatosis viral related oncogene, neuroblastoma derived (avian) | -12.54         | 0.00           | 0.17          | BRAF; MEK                     |
| 1440355_at         | Kctd12b       | potassium channel tetramerisation domain containing 12b                      | -12.92         | 0.00           | 0.16          |                               |
| 1453282_at         | Cxadr         | coxsackievirus and adenovirus receptor                                       | -13.46         | 0.00           | 0.21          | BRAF; MEK                     |
| 1448558_a_at       | Pla2g4a       | phospholipase A2, group IVA (cytosolic, calcium-dependent)                   | -13.65         | 0.00           | 0.29          | ; MEK                         |
| 1416041_at         | Sgk1          | serum/glucocorticoid regulated kinase 1                                      | -13.93         | 0.00           | 0.22          | BRAF; MEK                     |
| 1422562_at         | Rrad          | Ras-related associated with diabetes                                         | -14.39         | 0.00           | 0.28          | BRAF; MEK                     |
| 1415834_at         | Dusp6         | dual specificity phosphatase 6                                               | -16.40         | 0.00           | 0.09 *        | BRAF; MEK                     |
