# Supplementary material for: Reversible, interrelated mRNA and miRNA expression patterns in the transcriptome of Rasless fibroblasts: functional and mechanistic implications
Source: PubMed Central journal article supplement (PMC4007593; doi:10.1186/1471-2164-14-731), 2013-10-25
Supplement: 1471-2164-14-731-S3.pdf [file 1471-2164-14-731-S3.pdf]

**Table S3. Functional annotation of the upregulated, differentially expressed genes of Rasless MEFs.**

The GeneCodis (Gene Annotation Co-occurrence Discovery) functional annotation tool (<http://genecodis.dacya.ucm.es>) was used to identify statistically significant functional associations linking particular gene subsets contained within the list of induced loci occurring in Rasless MEFs (Table S1, Additional file 1, FDR=0.01) to specific cellular functionalities, including particular Biological Processes (section S3-BP), Signalling Pathways (Section S3-KEGG), Transcriptional Factors (section S3-TF) or miRNAs (section S3-miRNA).

The column labelled “*Functional Category*” identifies the specific functional GO terms recognized in each case for the corresponding groups of loci listed under the column labelled “*Genes*”. The column labelled “*Number of Genes*” indicates the specific number of genes linked to the indicated functionality, out of the total number (in parenthesis) of genes recognized by GeneCodis in the list of induced genes of Rasless cells. The column labeled “*Corrected p-value*” refers to the statistical significance of the functional associations identified, and contains p-values calculated cases using the Hypergeometric Distribution and subsequently corrected by implementing the False Discovery Rate method of Benjamini and Hochberg [113].

In section S3-BP (pages 2-6), the column “*Functional category*” assigns common colors to groups of related GO numbers and descriptions falling under the same, high level, general functional categories (Metabolite processing, Signaling, Cell death, Transport, etc). In section S3-KEGG (pages 7-8), the column “*KEGG Pathway*” identifies KEGG number and denomination of signalling pathways potentially affected by the corresponding group of induced loci listed in each case. In section S3-TF (pages 9-15), the “*Transcription Factors*” column identifies specific transcription factors that may account for induction of the corresponding groups of loci listed in each case. Finally, in section S3-miRNA (pages 16-40), the “*miRNA name*” column identifies specific mouse miRNAs that, according to current literature and databases, may contribute to the patterns of mRNA overexpression described for Rasless cells in Table S1.

**Table S3-BP. Functional annotation to GO BIOLOGICAL PROCESSES of the induced, overexpressed genes of Rasless MEFs.**

| <i>Functional category</i>                               | <i>Number of genes</i> | <i>Corrected p-value</i> | <i>Genes induced in Rasless cells (from Table S1)</i>                                                                                                                                                                                                                                                                                                                                                                                                                                                                                                                                                                                                                                                                                                                                                                                                                                                                                                                         |
|----------------------------------------------------------|------------------------|--------------------------|-------------------------------------------------------------------------------------------------------------------------------------------------------------------------------------------------------------------------------------------------------------------------------------------------------------------------------------------------------------------------------------------------------------------------------------------------------------------------------------------------------------------------------------------------------------------------------------------------------------------------------------------------------------------------------------------------------------------------------------------------------------------------------------------------------------------------------------------------------------------------------------------------------------------------------------------------------------------------------|
| <b><u>TRANSPORT (METABOLITES, IONS AND VESICLES)</u></b> |                        |                          |                                                                                                                                                                                                                                                                                                                                                                                                                                                                                                                                                                                                                                                                                                                                                                                                                                                                                                                                                                               |
| <b>GO:0006810: transport</b>                             | 119(776)               | 2,42E-29                 | Eif5a2, Crat, Ap3s1, Copg, Slc2a13, Slc6a7, Snx18, Ubl4, Crot, Trpc7, Slc39a3, Slc22a18, Rab3d, Gabarapl2, Kcnc2, Rab38, Glrb, Rab11fip5, Atp6v0e, Slc16a9, Napb, Kcnn1, Abcb6, Slc6a6, Stam2, Hd1bp, Trpv4, Ndufb2, Atp6v1e1, Vps39, Trappc6a, Dynlrb1, Slc35a2, F630110N24Rik, Copz2, Slc7a7, Abcd1, Tmco3, Qk, Slc31a2, Slc44a1, Stx8, Al317395, Ap3m2, Ero1l, Cacna1g, Myo6, Txnrd3, Atp2a3, Tpcn1, Ccdc64, Trappc2l, Ndel1, Nipa1, Tcn2, Ndufa10, Kpna1, Stard6, Slc38a7, Slc9a6, Slc35b1, Slc22a23, Grik2, Ergic3, Sec22c, Fabp3, Slc6a8, Slc35c2, Exoc3, Atg4a, 2310046K01Rik, Vdac1, Slc22a4, S100a13, Snx10, Itpr2, Vps25, Dynlt3, Atg7, Rab2b, Dopey2, Pltp, Necap2, Slc26a11, Atp6v0b, Dirc2, Gabarap, Slc39a14, Tmed8, Slco3a1, Cyb5, Rab7l1, Slc1a4, Atp5s, Uqcrcq, Slc25a39, Slc2a6, Vamp3, Snx32, Vps24, Chmp4c, Cog6, Clcn7, Cbara1, Tom1l2, Slc25a35, Slc41a2, Atp5e, Scn1b, Atp6v0a1, Tmem38a, Stxbp1, Lrsam1, Slc2a8, Yif1a, Vps29, Cacna1b, Fads3, Rab22a |
| <b>GO:0015031: protein transport</b>                     | 41(776)                | 6,79E-11                 | Eif5a2, Ap3s1, Copg, Rab43, Snx18, Rab3d, Gabarapl2, Rab38, Rab11fip5, Rab40b, Napb, Stam2, Vps39, Copz2, Ap3m2, Myo6, Kpna1, Sec22c, Psen2, Exoc3, Atg4a, S100a13, Snx10, Vps25, Atg7, Rab2b, Dopey2, Necap2, Gabarap, Rab7l1, Vamp3, Snx32, Vps24, Chmp4c, Cog6, Tom1l2, Stxbp1, Lrsam1, Yif1a, Vps29, Rab22a                                                                                                                                                                                                                                                                                                                                                                                                                                                                                                                                                                                                                                                               |

| <i>Functional category</i>                                                       | <i>Number of genes</i> | <i>Corrected p-value</i> | <i>Genes induced in Rasless cells (from Table S1)</i>                                                                                                                                                                                                                                                                                                |
|----------------------------------------------------------------------------------|------------------------|--------------------------|------------------------------------------------------------------------------------------------------------------------------------------------------------------------------------------------------------------------------------------------------------------------------------------------------------------------------------------------------|
| <b>GO:0006811: ion transport</b>                                                 | 39(776)                | 2,64E-08                 | Trpc7, Slc39a3, Slc22a18, Kcnc2, Glrb, Atp6v0e, Kcnn1, Trpv4, Atp6v1e1, Tmco3, Slc31a2, Al317395, Cacna1g, Atp2a3, Tpcn1, Nipa1, Tcn2, Slc38a7, Slc9a6, Slc22a23, Grik2, Slc6a8, Vdac1, Slc22a4, Itpr2, Wnk4, Slc26a11, Atp6v0b, Slc39a14, Slco3a1, Atp5s, Clcn7, Cbara1, Slc41a2, Atp5e, Scn1b, Atp6v0a1, Tmem38a, Cacna1b                          |
| <b>GO:0055085: transmembrane transport</b>                                       | 28(776)                | 4,62E-05                 | Eif5a2,Slc2a13,Trpc7,Slc39a3,Slc22a18,Kcnc2,Slc16a9,Slc6a6,Trpv4,F630110N24 Rik,Slc7a7,Tmco3,Slc46a3,Slc44a1,Al317395,Tpcn1,Slc9a6,Slc35b1,Slc22a23,231 0046K01Rik,Vdac1,Slc22a4,Itpr2,Slc26a11,Slc39a14,Clcn7,Slc2a8,Cacna1b                                                                                                                        |
| <b>GO:0016192: vesicle-mediated transport</b>                                    | 16(776)                | 0,000170089              | Ap3s1,Copg,Napb,Trappc6a,Copz2,Stx8,Ap3m2,Trappc2l,Ergic3,Sec22c,Rab2b,V amp3,Stx2,Stx7,Stxbp1,Yif1a                                                                                                                                                                                                                                                 |
| <b>GO:0006886: intracellular protein transport</b>                               | 13(776)                | 0,00507565               | Ap3s1,Copg,Ehd1,Napb,Stam2,Ap3m2,Kpna1,Grik2,Cdk5,Apba1,Stx2,Tom1l2,St x7                                                                                                                                                                                                                                                                            |
| <b>GO:0008333: endosome to lysosome transport</b>                                | 5(776)                 | 0,00696839               | Stx8,Trak1,Mtm1,Vps24,Stx7                                                                                                                                                                                                                                                                                                                           |
| <b>GO:0006897: endocytosis</b>                                                   | 10(776)                | 0,0146921                | Mrc2,Snx18,Ehd1,Myo6,Ehd2,Necap2,Lrp4,App,Npc1,Rab22a                                                                                                                                                                                                                                                                                                |
| <b>GO:0045047: protein targeting to ER</b>                                       | 2(776)                 | 0,0185842                | Srp14,Srp54a                                                                                                                                                                                                                                                                                                                                         |
| <b>GO:0032456: endocytic recycling</b>                                           | 3(776)                 | 0,0190603                | Ehd1,Ehd3,Ehd2                                                                                                                                                                                                                                                                                                                                       |
| <b>GO:0008643: carbohydrate transport</b>                                        | 5(776)                 | 0,0253772                | Slc35a2,Al317395,Slc35b1,Slc2a6,Slc2a8                                                                                                                                                                                                                                                                                                               |
| <b>GO:0006816: calcium ion transport</b>                                         | 9(776)                 | 0,0303683                | Trpc7,Trpv4,Cacna1g,Atp2a3,Tpcn1,Psen2,Itpr2,Cbara1,Cacna1b                                                                                                                                                                                                                                                                                          |
| <b>GO:0042308: negative regulation of protein import into nucleus</b>            | 2(776)                 | 0,0323936                | Pkia,Mdfic                                                                                                                                                                                                                                                                                                                                           |
| <b>GO:0007340: acrosome reaction</b>                                             | 3(776)                 | 0,0390576                | GlrB,Trim36,Stx2                                                                                                                                                                                                                                                                                                                                     |
| <b>GO:0015991: ATP hydrolysis coupled proton transport</b>                       | 4(776)                 | 0,0423888                | Atp6v0e,Atp6v1e1,Atp6v0b,Atp6v0a1                                                                                                                                                                                                                                                                                                                    |
| <b>GO:0006887: exocytosis</b>                                                    | 6(776)                 | 0,0486208                | Rab3d,SnapiN,Scrn1,Cdk5,Exoc3,Stxbp1                                                                                                                                                                                                                                                                                                                 |
| <b><u>METABOLITE PROCESSING (PROTEIN, CARBOHYDRATE AND LIPID PROCESSING)</u></b> |                        |                          |                                                                                                                                                                                                                                                                                                                                                      |
| <b>GO:0008152: metabolic process</b>                                             | 55(776)                | 3,06E-08                 | Ugp2,Hadha,Fuca2,Crot,Dhrs3,Fahd2a,Papss2,Smpdl3a,Ctbs,Hexa,Aldh7a1,Ada mts5,Prss36,Neu1,Atp9b,Nfs1,Acox1,Dusp3,Pld1,Trpt1,Lpcat2,Dhrs1,Camk1,Hex b,Ube2h,Atp2a3,Gstm2,Galns,Hsd3b3,Impdh1,Aldh6a1,Man2b1,Entpd5,Ppt2,ld ua,Asah1,Aph1b,Rdh12,Naga,Atg7,Pde6d,Hgsnat,Srr,Adamts2,Ctsl,Galc,Glo1,Gs tp1,Typr1,Acaa1a,Hadhb,Uchl1,Aph1a,Atp10d,Aldh3a2 |
| <b>GO:0055114: oxidation-reduction process</b>                                   | 37(776)                | 5,75E-05                 | Sqrdl,Maob,Cat,Hadha,Dhrs3,Gpx4,Cyp27a1,Aldh7a1,Cyp4v3,Loxl1,Acox1,Maoa ,Dhrs1,Alkbh6,Ero1l,Sepw1,Txnrd3,Suox,Gstk1,Hsd3b3,Impdh1,Aldh6a1,P4ha2, Rdh12,Srd5a3,Pdia5,Ypel5,Pcbd2,Cyb5,Bcmo1,Htatip2,Typr1,Cox6a2,Cyb5r3,Co x6b1,Fads3,Aldh3a2                                                                                                         |
| <b>GO:0006749: glutathione metabolic process</b>                                 | 7(776)                 | 0,000420833              | Gpx4,Txnrd3,Gstm2,Gstk1,Glo1,Gstp1,Oplah                                                                                                                                                                                                                                                                                                             |
| <b>GO:0033540: fatty acid beta-oxidation using acyl-CoA oxidase</b>              | 4(776)                 | 0,000750702              | Crat,Acox1,Abcd1,Acaa1a                                                                                                                                                                                                                                                                                                                              |

| <i>Functional category</i>                                                                   | <i>Number of genes</i> | <i>Corrected p-value</i> | <i>Genes induced in Rasless cells (from Table S1)</i>                                                                                                        |
|----------------------------------------------------------------------------------------------|------------------------|--------------------------|--------------------------------------------------------------------------------------------------------------------------------------------------------------|
| GO:0006629: lipid metabolic process                                                          | 17(776)                | 0,000904153              | Crat,Iah1,Plb1,Hadha,Samd8,Crot,Insig2,Hdlbp,Acox1,Asah1,Srd5a3,Plcb1,Abhd5,Acaa1a,Daglb,Hadhb,Fads3                                                         |
| GO:0008654: phospholipid biosynthetic process                                                | 8(776)                 | 0,00106116               | Pld1,Lpcat2,Hexb,Pcyt1a,Sh3glb1,Abhd5,Ptdss1,Chpt1                                                                                                           |
| GO:0006184: GTP catabolic process                                                            | 12(776)                | 0,00182145               | Rras,Rhoq,Rragc,Rasl12,Arl2,Srp54a,Tuba8,Mras,Rhoj,Rit1,Tubb2a,Rab22a                                                                                        |
| GO:0007220: Notch receptor processing                                                        | 3(776)                 | 0,00693993               | Psen2,Dner,Aph1a                                                                                                                                             |
| GO:0042326: negative regulation of phosphorylation                                           | 5(776)                 | 0,0103424                | Bmp4,Pkia,Cdkn1a,Cdkn2b,1700021C14Rik                                                                                                                        |
| GO:0006654: phosphatidic acid biosynthetic process                                           | 3(776)                 | 0,0106918                | Pld1,Sh3glb1,Abhd5                                                                                                                                           |
| GO:0044255: cellular lipid metabolic process                                                 | 5(776)                 | 0,0111373                | Crat,Crot,Acox1,Abcd1,Acaa1a                                                                                                                                 |
| GO:0006631: fatty acid metabolic process                                                     | 8(776)                 | 0,0194895                | Crat,Hadha,Crot,Acox1,Abhd5,Cyb5,Acaa1a,Hadhb                                                                                                                |
| GO:0031293: membrane protein intracellular domain proteolysis                                | 3(776)                 | 0,0323233                | Aph1b,Psen2,Aph1a                                                                                                                                            |
| GO:0006663: platelet activating factor biosynthetic process                                  | 2(776)                 | 0,0323936                | Lpcat2,Chpt1                                                                                                                                                 |
| GO:0009313: oligosaccharide catabolic process                                                | 2(776)                 | 0,0323936                | Ctbs,Hexb                                                                                                                                                    |
| GO:0006689: ganglioside catabolic process                                                    | 2(776)                 | 0,0323936                | Hexa,Hexb                                                                                                                                                    |
| GO:0051084: 'de novo' posttranslational protein folding                                      | 2(776)                 | 0,0323936                | Entpd5,Sh3glb1                                                                                                                                               |
| GO:0005975: carbohydrate metabolic process                                                   | 11(776)                | 0,0324897                | Fuca2,Ctbs,Hexa,Hexb,Man2b1,Idua,Naga,Galc,Glo1,Chid1,Chst12                                                                                                 |
| GO:0010951: negative regulation of endopeptidase activity                                    | 7(776)                 | 0,0328439                | Serpinb6c,Renbp,Timp2,Serpinb9c,Serpinb9b,Serpinb1a,Reck                                                                                                     |
| GO:0006508: proteolysis                                                                      | 19(776)                | 0,0343208                | Prss29,Adamts5,Prss36,Scrn1,Bace1,Klk1b4,Ctso,Qpct,Nrip3,Htra3,Capn5,Atg4a,Ctsb,2010111101Rik,Adamts2,Ctsl,Cpa6,Tpp1,Immp1l                                  |
| GO:0016310: phosphorylation                                                                  | 27(776)                | 0,0350662                | Pank2,Camk4,Papss2,Stk10,Stk39,Prkab2,Amhr2,Gsk3b,Ephb3,Mapk4,Guk1,Rio k3,Cdk5,Ulk2,Akap4,Tollip,Grk4,Wnk4,Pkia,Ikbkg,Hck,Cdkn1a,Ckm,Cdkn2b,Camkk1,Dmpk,Nagk |
| GO:0043086: negative regulation of catalytic activity                                        | 7(776)                 | 0,0354611                | Anxa3,Timp2,Anxa1,Pde6d,Pkia,Cdkn1a,1700021C14Rik                                                                                                            |
| GO:0042787: protein ubiquitination involved in ubiquitin-dependent protein catabolic process | 5(776)                 | 0,036621                 | Rnf144b,Lnx1,Wwp2,Hectd3,Os9                                                                                                                                 |
| GO:0043085: positive regulation of catalytic activity                                        | 6(776)                 | 0,0419269                | Slc37a4,Adc,Timp2,Aph1b,Psen2,Aph1a                                                                                                                          |
| GO:0006656: phosphatidylcholine biosynthetic process                                         | 3(776)                 | 0,0456366                | Fabp3,Pcyt1a,Chpt1                                                                                                                                           |

| <i>Functional category</i>                                                                     | <i>Number of genes</i> | <i>Corrected p-value</i> | <i>Genes induced in Rasless cells (from Table S1)</i>                                                                    |
|------------------------------------------------------------------------------------------------|------------------------|--------------------------|--------------------------------------------------------------------------------------------------------------------------|
| GO:0006044: N-acetylglucosamine metabolic process                                              | 3(776)                 | 0,0456366                | Renbp,Hexb,Nagk                                                                                                          |
| GO:0043433: negative regulation of sequence-specific DNA binding transcription factor activity | 5(776)                 | 0,0466305                | Thra,Prnp,Wwp2,Hr,Fzd6                                                                                                   |
| GO:0006657: CDP-choline pathway                                                                | 2(776)                 | 0,0476976                | Pcyt1a,Chpt1                                                                                                             |
| GO:0008612: peptidyl-lysine modification to hypusine                                           | 2(776)                 | 0,0476976                | Eif5a2,Dhps                                                                                                              |
| GO:0071569: protein ufmylation                                                                 | 2(776)                 | 0,0476976                | Ufc1,Ufm1                                                                                                                |
| GO:0019348: dolichol metabolic process                                                         | 2(776)                 | 0,0476976                | Srd5a3,Dpm2                                                                                                              |
| <b>SIGNALING</b>                                                                               |                        |                          |                                                                                                                          |
| GO:0007264: small GTPase mediated signal transduction                                          | 19(776)                | 1,73E-05                 | Rab43,Rab3d,Rab38,Rras,Rhoq,Rab40b,Klk1b4,Rasl12,Arl2,Nkiras1,Nkiras2,Rab2b,Rasl10b,Rab711,Arhgap1,Mras,Rhoj,Rit1,Rab22a |
| GO:0043407: negative regulation of MAP kinase activity                                         | 5(776)                 | 0,0111373                | Dab2ip,Gsk3b,Bmp4,Gstp1,Uchl1                                                                                            |
| GO:0007219: Notch signaling pathway                                                            | 6(776)                 | 0,0371148                | Dtx2,Aph1b,Psen2,Dner,App,Aph1a                                                                                          |
| GO:0007176: regulation of epidermal growth factor-activated receptor activity                  | 2(776)                 | 0,0476976                | Psen2,App                                                                                                                |
| <b>CELL COMUNICATION</b>                                                                       |                        |                          |                                                                                                                          |
| GO:0007268: synaptic transmission                                                              | 12(776)                | 0,00018795<br>7          | Snap91,Glrb,Snapiin,Clstn1,Cacna1g,Myo6,Npy6r,Dlg2,Rapsn,Grik2,Vdac1,Apba1                                               |
| GO:0042552: myelination                                                                        | 5(776)                 | 0,0206488                | Pmp22,Mal,Hexa,Qk,Hexb                                                                                                   |
| GO:0010807: regulation of synaptic vesicle priming                                             | 2(776)                 | 0,0323936                | Napb,Stxbp1                                                                                                              |
| <b>DEVELOPMENTAL PROCESS</b>                                                                   |                        |                          |                                                                                                                          |
| GO:0016322: neuron remodeling                                                                  | 4(776)                 | 0,00075070<br>2          | Farp2,Cspg4,Ntn4,App                                                                                                     |
| GO:0031175: neuron projection development                                                      | 8(776)                 | 0,00738065               | Lamb2,Ccdc64,Ndel1,L1cam,Cdk5,Atg7,App,Ptprm                                                                             |
| GO:0016044: cellular membrane organization                                                     | 9(776)                 | 0,0114223                | Copg,Sgca,Stam2,Sgcb,Lpcat2,Vps25,Atg7,Vps24,Chmp4c                                                                      |
| GO:0007409: axonogenesis                                                                       | 8(776)                 | 0,0178423                | Snap91,Gsk3b,Cdk5,Ulk2,App,Fzd8,Fzd6,Uchl1                                                                               |
| GO:0008360: regulation of cell shape                                                           | 7(776)                 | 0,018157                 | Rhoq,Fn1,Cdc42ep2,S100a13,Tbccd1,Rhoj,Shroom3                                                                            |
| GO:0051124: synaptic growth at neuromuscular junction                                          | 2(776)                 | 0,0185842                | Lrp4,App                                                                                                                 |

| <i>Functional category</i>                                                                            | <i>Number of genes</i> | <i>Corrected p-value</i> | <i>Genes induced in Rasless cells (from Table S1)</i>                                          |
|-------------------------------------------------------------------------------------------------------|------------------------|--------------------------|------------------------------------------------------------------------------------------------|
| GO:0043113: receptor clustering                                                                       | 4(776)                 | 0,0192507                | Dlg2,Grik2,Cdk5,Lrp4                                                                           |
| GO:0032331: negative regulation of chondrocyte differentiation                                        | 3(776)                 | 0,0323233                | Wnt9a,Bmp4,Ltbp3                                                                               |
| GO:0048642: negative regulation of skeletal muscle tissue development                                 | 2(776)                 | 0,0323936                | Usp2,Tsc22d3                                                                                   |
| GO:0001501: skeletal system development                                                               | 7(776)                 | 0,0366988                | Acp2,Hexa,Tgfb2,Hexb,Bmp4,Chrd,Ltbp3                                                           |
| GO:0030198: extracellular matrix organization                                                         | 7(776)                 | 0,042568                 | Fbln5,Fn1,Tgfb2,Ccdc80,App,Adamts14,Reck                                                       |
| GO:0007412: axon target recognition                                                                   | 2(776)                 | 0,0476976                | Stxbp1,Uchl1                                                                                   |
| GO:0050873: brown fat cell differentiation                                                            | 4(776)                 | 0,0481316                | Rarres2,Ero1l,Aldh6a1,Nudt7                                                                    |
| <b>CELL DEATH</b>                                                                                     |                        |                          |                                                                                                |
| GO:0006916: anti-apoptosis                                                                            | 13(776)                | 0,00131366               | Birc7,Fn1,Gsk3b,Prnp,Psen2,Hbxip,Vnn1,Triap1,Sh3glb1,Cryab,Tsc22d3,Glo1,Mc1l                   |
| GO:0043066: negative regulation of apoptotic process                                                  | 17(776)                | 0,00719886               | Cat,Smad6,Tgfb2,Gsk3b,Prnp,Bmp4,Nme2,Anxa1,Adar,Psen2,Atg7,Cryab,Gstp1,Cdkn1a,Gas6,Igbbp1,Mcl1 |
| GO:0043154: negative regulation of cysteine-type endopeptidase activity involved in apoptotic process | 6(776)                 | 0,020777                 | Wnt9a,Smad6,Hbxip,Triap1,Cryab,Igbbp1                                                          |
| <b>CYTOSKELETON-REGULATED PROCESSES</b>                                                               |                        |                          |                                                                                                |
| GO:0007018: microtubule-based movement                                                                | 7(776)                 | 0,0210754                | Kif27,Kif3b,Dynlrb1,Kif1c,Tuba8,Kif3a,Tubb2a                                                   |
| <b>CELL CYCLE (MITOTIC AND MEIOTIC DIVISION)</b>                                                      |                        |                          |                                                                                                |
| GO:0000086: G2/M transition of mitotic cell cycle                                                     | 4(776)                 | 0,021455                 | Ccny,Plcb1,Cdkn1a,Cdkn2b                                                                       |
| GO:0016049: cell growth                                                                               | 5(776)                 | 0,0226594                | Adra1b,Atp6v0e,Tgfb2,Entpd5,Nupr1                                                              |
| <b>OTHERS</b>                                                                                         |                        |                          |                                                                                                |
| GO:0071363: cellular response to growth factor stimulus                                               | 4(776)                 | 0,032519                 | Ppp2r5b,Bmp4,Sparc,Gas6                                                                        |

**Table S3-KEGG. Functional annotation to KEGG PATHWAYS of the induced, overexpressed genes of Rasless MEFs.**

| <i>KEGG Pathway</i>                                       | <i>Number of genes</i> | <i>Corrected p-value</i> | <i>Genes induced in Rasless cells (from Table S1)</i>                                                                                                            |
|-----------------------------------------------------------|------------------------|--------------------------|------------------------------------------------------------------------------------------------------------------------------------------------------------------|
| (KEGG) 04142 :Lysosome                                    | 24(776)                | 1,74E-14                 | Hexa, Man2b1, Idua, Naga, Asah1, Npc1, Ctsl, Npc2, Acp2, Neu1, Hexb, Ppt2, Atp6v0b, Galc, Hgsnat, Scarb2, Ap3s1, Ap3m2, Atp6v0a1, Ctsb, Tpp1, Galns, Gnptg, Ctso |
| (KEGG) 05010 :Alzheimer's disease                         | 17(776)                | 9,05E-06                 | Atp5e, Uqcrcq, Cox6b1, Ndufb2, Aph1a, Gsk3b, Atp2a3, Cdk5, Psen2, Aph1b, Ndufb4, App, Bace1, Ndufa10, Itpr2, Plcb1, Cox6a2                                       |
| (KEGG) 04140 :Regulation of autophagy                     | 7(776)                 | 0,000311192              | Ulk2, Gabarapl2, Gabarap, Atg7, Atg12, Atg4a, Gabarapl1                                                                                                          |
| (KEGG) 04146 :Peroxisome                                  | 10(776)                | 0,00036405               | Acaa1a, Acox1, Gstk1, Cat, Crot, Pxmp4, Crat, Mpv17, Mlycd, Abcd1                                                                                                |
| (KEGG) 00511 :Other glycan degradation                    | 5(776)                 | 0,000708504              | Hexa, Man2b1, Neu1, Hexb, Fuca2                                                                                                                                  |
| (KEGG) 00640 :Propanoate metabolism                       | 6(776)                 | 0,00115798               | Aldh6a1, Hadha, Mcee, Aldh3a2, Aldh7a1, Mlycd                                                                                                                    |
| (KEGG) 00531 :Glycosaminoglycan degradation               | 5(776)                 | 0,00135779               | Hexa, Idua, Hexb, Hgsnat, Galns                                                                                                                                  |
| (KEGG) 00280 :Valine, leucine and isoleucine degradation  | 7(776)                 | 0,00136813               | Acaa1a, Aldh6a1, Hadhb, Hadha, Mcee, Aldh3a2, Aldh7a1                                                                                                            |
| (KEGG) 04144 :Endocytosis                                 | 15(776)                | 0,00142523               | Ehd1, Iqsec2, Ehd3, Rab11fip5, Tgfb2, Smad6, Stam2, Rab22a, Grk4, Vps25, Vps24, Pld1, Ehd2, Sh3glb1, Chmp4c                                                      |
| (KEGG) 00190 :Oxidative phosphorylation                   | 11(776)                | 0,00187941               | Atp5e, Uqcrcq, Cox6b1, Ndufb2, Atp6v1e1, Atp6v0b, Ndufb4, Atp6v0a1, Ndufa10, Atp6v0e, Cox6a2                                                                     |
| (KEGG) 00380 :Tryptophan metabolism                       | 6(776)                 | 0,0047997                | Hadha, Maoa, Aldh3a2, Cat, Aldh7a1, Maob                                                                                                                         |
| (KEGG) 00071 :Fatty acid metabolism                       | 6(776)                 | 0,00634405               | Acaa1a, Acox1, Hadhb, Hadha, Aldh3a2, Aldh7a1                                                                                                                    |
| (KEGG) 00062 :Fatty acid elongation in mitochondria       | 3(776)                 | 0,00638668               | Hadhb, Hadha, Ppt2                                                                                                                                               |
| (KEGG) 00520 :Amino sugar and nucleotide sugar metabolism | 6(776)                 | 0,00683403               | Hexa, Nagk, Cyb5r3, Renbp, Hexb, Ugp2                                                                                                                            |
| (KEGG) 04145 :Phagosome                                   | 11(776)                | 0,00767324               | Stx7, Ctsl, Tuba8, Vamp3, Atp6v1e1, Atp6v0b, Atp6v0a1, Mrc2, Atp6v0e, Tubb2a, Tlr6                                                                               |
| (KEGG) 00260 :Glycine, serine and threonine metabolism    | 5(776)                 | 0,00789637               | Srr, Maoa, Alas1, Aldh7a1, Maob                                                                                                                                  |
| (KEGG) 05146 :Amoebiasis                                  | 9(776)                 | 0,00813759               | Serpib1a, Tgfb2, Lama2, Serpinb6c, Serpinb9c, Serpinb9b, Lamb2, Plcb1, Fn1                                                                                       |
| (KEGG) 04916 :Melanogenesis                               | 8(776)                 | 0,0085614                | Fzd8, Tyrp1, Creb3, Gsk3b, Adcy9, Wnt9a, Plcb1, Fzd6                                                                                                             |
| (KEGG) 05217 :Basal cell carcinoma                        | 6(776)                 | 0,00891424               | Fzd8, Bmp4, Gsk3b, Wnt9a, Hhip, Fzd6                                                                                                                             |
| (KEGG) 00330 :Arginine and proline metabolism             | 6(776)                 | 0,00898224               | Maoa, Aldh3a2, Adc, Aldh7a1, Maob, Ckm                                                                                                                           |
| (KEGG) 00920 :Sulfur metabolism                           | 3(776)                 | 0,00907299               | Suox, Papss2, Chst12                                                                                                                                             |
| (KEGG) 00564 :Glycerophospholipid metabolism              | 7(776)                 | 0,0112858                | Lpcat2, Plb1, Chpt1, Pld1, Ptdss1, Pcyt1a, Dgkg                                                                                                                  |

| <i>KEGG Pathway</i>                                           | <i>Number of genes</i> | <i>Corrected p-value</i> | <i>Genes induced in Rasless cells (from Table S1)</i>                                       |
|---------------------------------------------------------------|------------------------|--------------------------|---------------------------------------------------------------------------------------------|
| (KEGG) 05016 :Huntington's disease                            | 11(776)                | 0,0115358                | Atp5e, Uqcrcq, Cox6b1, Ndufb2, Creb3, Vdac1, Ndufb4, Dnalcl1, Ndufa10, Plcb1, Cox6a2        |
| (KEGG) 00620 :Pyruvate metabolism                             | 5(776)                 | 0,0117742                | Glo1, Acyp2, Acyp1, Aldh3a2, Aldh7a1                                                        |
| (KEGG) 04360 :Axon guidance                                   | 9(776)                 | 0,0118808                | L1cam, Arhgef12, Sema3f, Ephb3, Sema3c, Gsk3b, Cdk5, Sema3b, Ntn4                           |
| (KEGG) 05012 :Parkinson's disease                             | 9(776)                 | 0,0118808                | Atp5e, Uqcrcq, Cox6b1, Uchl1, Ndufb2, Vdac1, Ndufb4, Ndufa10, Cox6a2                        |
| (KEGG) 05410 :Hypertrophic cardiomyopathy (HCM)               | 7(776)                 | 0,0119038                | Itga9, Tgfb2, Lmna, Lama2, Sgcb, Sgca, Prkab2                                               |
| (KEGG) 00410 :beta-Alanine metabolism                         | 4(776)                 | 0,0159053                | Hadha, Aldh3a2, Aldh7a1, Mlycd                                                              |
| (KEGG) 00340 :Histidine metabolism                            | 4(776)                 | 0,0159053                | Maoa, Aldh3a2, Aldh7a1, Maob                                                                |
| (KEGG) 05414 :Dilated cardiomyopathy                          | 7(776)                 | 0,0159599                | Itga9, Tgfb2, Lmna, Adcy9, Lama2, Sgcb, Sgca                                                |
| (KEGG) 00604 :Glycosphingolipid biosynthesis - ganglio series | 3(776)                 | 0,0188818                | Hexa, St3gal5, Hexb                                                                         |
| (KEGG) 00603 :Glycosphingolipid biosynthesis - globo series   | 3(776)                 | 0,0188818                | Hexa, Naga, Hexb                                                                            |
| (KEGG) 00565 :Ether lipid metabolism                          | 4(776)                 | 0,0286588                | Lpcat2, Plb1, Chpt1, Pld1                                                                   |
| (KEGG) 04130 :SNARE interactions in vesicular transport       | 4(776)                 | 0,0308896                | Stx7, Vamp3, Stx2, Stx8                                                                     |
| (KEGG) 05323 :Rheumatoid arthritis                            | 6(776)                 | 0,0360445                | Ctsl, Tgfb2, Atp6v1e1, Atp6v0b, Atp6v0a1, Atp6v0e                                           |
| (KEGG) 00860 :Porphyrin and chlorophyll metabolism            | 4(776)                 | 0,0406406                | Mmab, Alas1, Ugt2b36, Fech                                                                  |
| (KEGG) 05200 :Pathways in cancer                              | 14(776)                | 0,0407771                | Fzd8, Bmp4, Cdkn1a, Tgfb2, Arnt, Gsk3b, Lama2, Wnt9a, Ikbkg, Hhip, Lamb2, Cdkn2b, Fzd6, Fn1 |
| (KEGG) 04350 :TGF-beta signaling pathway                      | 6(776)                 | 0,0416433                | Chrd, Bmp4, Tgfb2, Smad6, Amhr2, Cdkn2b                                                     |
| (KEGG) 04540 :Gap junction                                    | 6(776)                 | 0,042932                 | Pdgfc, Tuba8, Adcy9, Itpr2, Plcb1, Tubb2a                                                   |
| (KEGG) 00982 :Drug metabolism - cytochrome P450               | 6(776)                 | 0,0441799                | Gstp1, Gstk1, Maoa, Gstm2, Ugt2b36, Maob                                                    |
| (KEGG) 04010 :MAPK signaling pathway                          | 12(776)                | 0,0453099                | Dusp8, Dusp22, Cacna1b, Tgfb2, Mras, Gadd45b, Ikbkg, Cacna1g, Jund, Rras, Map3k8, Dusp3     |
| (KEGG) 05215 :Prostate cancer                                 | 6(776)                 | 0,0467559                | Pdgfc, Gstp1, Cdkn1a, Creb3, Gsk3b, Ikbkg                                                   |
| (KEGG) 04020 :Calcium signaling pathway                       | 9(776)                 | 0,0480743                | Adra1b, Cacna1b, Atp2a3, Adcy9, Camk4, Cacna1g, Vdac1, Itpr2, Plcb1                         |
| (KEGG) 03060 :Protein export                                  | 3(776)                 | 0,048273                 | Immp1l, Srp14, Srp54a                                                                       |

**Table S3-TF. Functional annotation to “TRANSCRIPTION FACTORS” of the induced, overexpressed genes of Rasless MEFs.**

| <i>Transcription Factor</i> | <i>Number of genes</i> | <i>Corrected p-value</i> | <i>Genes induced in Rasless cells (from Table S1)</i>                                                                                                                                                                                                                                                                                                                                                                                                                                                                                                                                                                                                                                                                                                                                                            |
|-----------------------------|------------------------|--------------------------|------------------------------------------------------------------------------------------------------------------------------------------------------------------------------------------------------------------------------------------------------------------------------------------------------------------------------------------------------------------------------------------------------------------------------------------------------------------------------------------------------------------------------------------------------------------------------------------------------------------------------------------------------------------------------------------------------------------------------------------------------------------------------------------------------------------|
| V\$SP1_Q6                   | 109(776)               | 2,36E-16                 | Glo1, Hr, Cspg4, Npdc1, Zbtb4, Fzd8, Tbcd, Gstp1, Rab4b, Kcnn1, Srr, Klf2, Man2b1, Vps39, Gabarapl2, Bmp4, Hd1bp, Ttc15, Tom1, Hoxa1, Gabarap, Sirt2, Arhgap1, Cryab, Cdkn1a, Cacna1b, Habp4, Adamts2, Mtmr3, Samd8, Npc2, Smad6, Ephb3, Creb3, Apoa1bp, Ugp2, Camkk1, Gsk3b, Dnajc4, Gpx4, Tcta, Kif27, Atp6v0b, Sqrdl, Fbn2, Reck, Rragc, Rab22a, Maoa, Vps29, Slc39a3, Dbp, Nkiras2, Capn5, Impdh1, Nfe2l1, Mocs2, Ndel1, Lrsam1, Myadm, Srp14, Kif1c, Elmo2, Klf15, Ensa, Rab2b, Ing4, Cacna1g, Vps24, Dleu2, Stxbp1, Ap3s1, Mrps14, Sema3b, Amhr2, Crot, Mtss1, Arvcf, Stmn3, Jund, Aldh7a1, Slc2a6, Rras, Maob, Gpc4, Adamts5, Itpr2, Kif3a, Rab3d, Plcb1, Fbxl2, Pltp, Galns, Thra, Dusp3, Slc9a6, Gabarapl1, Tpcn1, Lrpap1, Abcd1, Clstn1, Abcb6, Cry2, Rab40b, Prkab2, Slco3a1, Pde6d, Cdc42ep2, Mrgprf |
| V\$PAX4_Q3                  | 60(776)                | 5,89E-11                 | Qpct, Stk10, Kremen1, Hr, Arhgef12, Dusp8, Pmp22, Trpc7, Ppp2r5b, Ank2, Man2b1, Chrd, Bmp4, S100a16, Rarres2, Apba1, Gabarap, Nrip3, Cdkn1a, Slc39a14, Smad6, Rbms2, Kctd9, Creb3, Rora, Add3, Dlg2, S100a1, Tcta, Pkia, Dab2ip, Mtus1, Nkiras2, Capn5, Slc37a4, Nfe2l1, Wnt9a, Gadd45b, Kif1c, Cacna1g, Ap3s1, Lamb2, Sema3b, Mtss1, Tob1, Gpc4, Adamts5, Rab3d, Pbxip1, Plcb1, Sparc, Usp2, Thra, Slc9a6, Prelp, Zdhhc8, Gpr133, Dmpk, Ntn4, Abcd1                                                                                                                                                                                                                                                                                                                                                             |
| V\$E12_Q6                   | 83(776)                | 4,23E-10                 | Hr, Arhgef12, Slc6a7, Zbtb4, Pmp22, Rab43, Fbxl20, Ank2, Ltbp3, Kcnc2, Ufc1, Agl, Nagk, Bmp4, Hd1bp, S100a16, Dhrs3, Adra1b, Hoxa1, Apba1, Gabarap, Nrip3, Repin1, Ssbp2, Ehd1, Fabp3, Ndr4, Slc39a14, Sema3f, Cobl, Galnt2, Camkk1, Ppt2, Add3, Dlg2, Snx10, Atp6v0b, Pkia, Rragc, Rab22a, Mtus1, Dbp, Slc37a4, Wnt9a, Fuca2, Gadd45b, Psen2, Dtx2, Kif13b, Rasl10b, Serf2, C1qtnf1, Kif1c, Klf15, Cacna1g, Stxbp1, Hhip, Sema3b, Wwp2, Mtss1, Arvcf, App, Bace1, Itpr2, Pbxip1, Plcb1, Crat, Abtb2, Ckm, Usp2, Thra, Dusp3, Rhoq, Prelp, Cox6a2, Dmpk, Mpv17, Ntn4, Rasl12, Cdh7, Dgkg, Slco3a1, Mrgprf                                                                                                                                                                                                        |
| V\$AP4_Q5                   | 59(776)                | 1,94E-09                 | L1cam, Pmp22, Ank2, Man2b1, Loxl1, Chrd, Lhfpl2, Ankrd12, Dhrs3, Hist1h3d, Apba1, Cryab, Mapk4, Rnf13, Renbp, Adamts2, Tuba8, Tgfb2, Arnt, Vamp3, Rapsn, Cpa6, Gsk3b, Dlg2, Esrrb, Napb, Cdk5, Lrba, Scrn1, Impdh1, Wnt9a, Rasl10b, Myadm, Serf2, C1qtnf1, Ube2h, Cacna1g, Dleu2, Lamb2, Mtss1, App, Map3k8, Ufm1, Tob1, Pbxip1, Abtb2, Ckm, Rit1, Slc1a4, Cox6a2, Dmpk, Lrch1, Mlycd, Rabac1, Slc35c2, Tollip, Rasl12, Tpcn1, Mrgprf                                                                                                                                                                                                                                                                                                                                                                            |
| V\$NF1_Q6                   | 41(776)                | 3,37E-08                 | Wisp2, Hr, Arhgef12, Ppp2r5b, Loxl1, Slc35b1, Chrd, Ankrd12, Dhrs3, Jdp2, Cryab, Ssbp2, Fabp3, Abhd5, Rbms2, Camkk1, Sema3c, Rora, Lmna, Add3, Dlg2, Snx10, Atp2a3, Napb, Akap4, Kif13b, C1qtnf1, Ube2h, Tom1l2, Lancl1, Hhip, Ap3s1, Lamb2, Stac, Mtss1, Rras, Pbxip1, Plcb1, Rit1, Prelp, Abcb6                                                                                                                                                                                                                                                                                                                                                                                                                                                                                                                |
| V\$FOXO4_Q1                 | 68(776)                | 3,97E-08                 | Dner, Kremen1, Satb1, Hr, Glrb, Dusp8, Rab43, Fbxl20, Kcnn1, Mfap5, Kcnc2, Ulk2, Agl, Gabarapl2, Bmp4, Zdhhc4, Dhrs3, Apba1, Gabarap, Ssbp2, Anxa1, Ehd1, Rnf13, Tgfb2, Smad6, Rbms2, Ndufb2, Ephb3, Rora, Dlg2, Nfs1, Pkia, Fbn2, Gpr39, Fstl1, Dbp, Atp10d, Dtx2, Gng5, Ube2h, Tom1l2, Ing4, Gri2, Hhip, Riok3, Atp6v0a1, Ezh1, App, Tob1, Pld1, Mrc2, Plcb1, Sh3glb1, Dirc2, Usp2, Thra, Rit1, Fn1, Rhoq, Ptprm, Gabarapl1, Ntn4, Clstn1, Znr2, Cry2, Garnl3, Frmpd1, Mrgprf                                                                                                                                                                                                                                                                                                                                  |
| V\$MAZ_Q6                   | 72(776)                | 1,50E-07                 | Satb1, Hr, Arhgef12, Slc6a7, Dusp8, Npdc1, Zbtb4, Fbxl20, Kcnc2, Gabarapl2, Chrd, Mkrn1, Bmp4, S100a16, Hoxa1, Arl2, Gabarap, Slamf9, Cdkn1a, Ssbp2, Tuba8, Tgfb2, Arnt, Selm, Rab38, Nkiras1, Galnt2, Ugp2, Rora, Lmna, Ppt2, Add3, Gsk3b, Dlg2, Dnajc4, Gpx4, Atp2a3, Tcta, Dab2ip, Mtus1, Dbp, Iscu, Impdh1, Gadd45b, Gdf15, Lrsam1, Myadm, Kif1c, Klf15, Ube2h, Ensa, Cacna1g, Ap3s1, Amhr2, Wwp2, Arvcf, Bace1, Rras, Map3k8, Tob1, Gpc4, Adamts5, Mrc2, Tbc1d14, Sparc, Usp2, Thra, Prelp, Dmpk, Clstn1, Dgkg, Cdc42ep2                                                                                                                                                                                                                                                                                    |
| V\$AP1_C                    | 45(776)                | 4,37E-07                 | Stk10, Cspg4, Pmp22, Dusp22, Gstp1, Ltbp3, Slc35b1, Fads3, Dhrs3, Suox, Nrip3, Cdkn1a, Cobl, Camkk1, Lmna, Cpa6, Snx10, Napb, Fstl1, Scrn1, Gadd45b, Dtx2, Lrsam1, Camk4, Sema3b, Atp6v0a1, Ecm1, App, Tob1, Rab3d, Pcsk6, Sparc, Usp2, Slc22a18, Rit1, Rhoq, Gabarapl1, Dmpk, Mpv17, Ntn4, Synpo, Abcd1, Abcb6, Lynx1, Mrgprf                                                                                                                                                                                                                                                                                                                                                                                                                                                                                   |
| V\$ERR1_Q2                  | 43(776)                | 8,54E-07                 | Dner, Satb1, Arhgef12, Dok4, Ltbp3, Kcnn1, Mfap5, Mal, Cdkn1a, Fabp3, Uchl1, Slc31a2, Sema3f, Ascc1, Creb3, Ugp2, Fbln5, Dlg2, Esrrb, Rab22a, Fstl1, Mtus1, Iscu, Nfe2l1, Slc2a13, Myadm, Nr2c1, Kif1c, Vdac1, Lamb2, App, Slc6a8, Abtb2, Usp2, Thra, Dusp3, Rhoq, Kif3b, Gabarapl1, Dscr3, Dmpk, Synpo, Slco3a1                                                                                                                                                                                                                                                                                                                                                                                                                                                                                                 |
| V\$PITX2_Q2                 | 33(776)                | 2,30E-06                 | Hr, Pdgc, Srr, Bmp4, Rpl17, Dhrs3, Hoxa1, Nrip3, Tyrp1, Tuba8, Arnt, Rbms2, Creb3, Rora, Ppt2, Add3, Gsk3b, Bbs5, Slc41a2, Slc35a2, Slc37a4, Impdh1, Gadd45b, Mtss1, Jund, App, Rras, Pbxip1, Ankrd29, Fzd6, Dusp3, Dmpk, Znr2                                                                                                                                                                                                                                                                                                                                                                                                                                                                                                                                                                                   |
| V\$MEIS1_Q1                 | 34(776)                | 1,99E-05                 | Hr, Arhgef12, Cspg4, Ppp2r5b, Stard6, Ank2, Rhoj, Ankrd12, Dhrs3, Adra1b, Hoxa1, Apba1, Arhgap1, Anxa1, Mtmr3, Abhd5, Rora, Esrrb, Cop2, Elmo2, Ube2h, Ensa, Ap3s1, Riok3, Mtss1, Bace1, Pxmp4, Cdkn2b, P4ha2, Crat, Abtb2, Usp2, Thra, Mrgprf                                                                                                                                                                                                                                                                                                                                                                                                                                                                                                                                                                   |



| <b>Transcription Factor</b> | <b>Number of genes</b> | <b>Corrected p-value</b> | <b>Genes induced in Rasless cells (from Table S1)</b>                                                                                                                                                                                                                                                                                                                                                                                                                                                                               |
|-----------------------------|------------------------|--------------------------|-------------------------------------------------------------------------------------------------------------------------------------------------------------------------------------------------------------------------------------------------------------------------------------------------------------------------------------------------------------------------------------------------------------------------------------------------------------------------------------------------------------------------------------|
| V\$NFAT_Q4_01               | 56(776)                | 3,42E-05                 | Ctbs, Arhgef12, Cspg4, Pmp22, Tbcd, Acyp2, Loxl1, Bmp4, Dhrs3, Hoxa1, Apba1, Gabarap, Jdp2, Repin1, Stx7, Cdkn1a, Ssbp2, Mapk4, Adamts2, Uchl1, Tgfb2, Abhd5, Rbms2, Rab38, Vamp3, Rora, Ppt2, Add3, Dlg2, Esrrb, Tcta, Fstl1, Slc35a2, Cables1, Gadd45b, Ube2h, Ensa, Stxbp1, Wwp2, Mtss1, Gdap1, Map3k8, Mrc2, Pcsk6, Pbxip1, Plcb1, Crat, Usp2, Rit1, Smpdl3a, Fn1, Prepl, Rasl12, Abcd1, Dgkg, Mrgprf                                                                                                                           |
| V\$AP1_Q4_01                | 17(776)                | 3,42E-05                 | Ltpb3, Slc35b1, Dhrs3, Cdkn1a, Cobl, Camkk1, Snx10, Fstl1, Ecm1, Tob1, Rab3d, Usp2, Rit1, Mpv17, Ntn4, Synpo, Abcd1                                                                                                                                                                                                                                                                                                                                                                                                                 |
| V\$LEF1_Q2                  | 73(776)                | 4,07E-05                 | Stk10, Kremen1, Satb1, L1cam, Hr, Zbtb4, Pdgfc, Rab43, Aldh6a1, Ank2, Ltpb3, Slc35b1, Slc7a7, Mkrn1, Ankrd12, Gabarap, Jdp2, Nrip3, Ehd1, Sh3bgr, C1qtnf6, Uchl1, Tgfb2, Sema3f, Npc2, Smad6, Arnt, Ephb3, Rora, Add3, Gsk3b, Esrrb, Gstk1, Pkia, Dab2ip, Reck, Rab22a, Mtus1, Dbp, Nkiras2, Vnn1, Nfe2l1, Gdap2, Wnt9a, C1qtnf1, Elmo2, Ube2h, Ing4, Cacna1g, Anxa3, Grik2, Lamb2, Fech, Wwp2, Atp6v0a1, Stmn3, Jund, App, Bace1, Slc2a6, Slc16a9, Maob, Tob1, Gpc4, Adamts5, Kif3a, Usp2, Rit1, Rhoq, Trpv4, Gpr133, Abcd1, Pank2 |
| V\$BACH2_01                 | 17(776)                | 4,17E-05                 | Fads3, Dhrs3, Cdkn1a, Camkk1, Lmna, Cpa6, Scrn1, Gadd45b, Dtx2, Ndel1, Rab3d, Rit1, Gabarapl1, Mpv17, Ntn4, Synpo, Abcd1                                                                                                                                                                                                                                                                                                                                                                                                            |
| V\$MTF1_Q4                  | 16(776)                | 4,43E-05                 | Hr, Fbxl20, Chrd, Repin1, Dab2ip, Klf15, Ppp1r16a, Mtss1, Arvcf, Tob1, Gpc4, Mrc2, Kif3a, Ehd2, Abtb2, Dgkg                                                                                                                                                                                                                                                                                                                                                                                                                         |
| V\$E4F1_Q6                  | 28(776)                | 6,07E-05                 | Zbtb4, Ank2, Ufc1, Hoxa1, Ari2, Cdkn1a, Hapb4, Tgfb2, Rbms2, Ndufb2, Maoa, Iscu, Atp10d, Ndel1, Nr2c1, Ube2h, Ensa, Ing4, Sema3b, Jund, Ndufa10, Mrc2, Fbxl2, Usp2, Thra, Hist1h4h, Ntn4, Cry2                                                                                                                                                                                                                                                                                                                                      |
| V\$SREBP1_01                | 23(776)                | 8,77E-05                 | Hexa, Arhgef12, Dusp8, Aldh6a1, Mmaa, S100a16, Tom1, Gabarap, Cbara1, Renbp, Acp2, Camkk1, Gsk3b, S100a1, Rragc, Rab22a, Nfe2l1, Fuca2, Cyp27a1, App, Dirc2, Dusp3, Tollip                                                                                                                                                                                                                                                                                                                                                          |
| V\$OLF1_01                  | 23(776)                | 9,09E-05                 | Hr, Pdgfc, Dusp22, Gas6, Fads3, Gabarapl2, Bmp4, Apba1, Repin1, Ephb3, Gsk3b, C1qtnf1, Rab2b, Sema3b, Mtss1, Itpr2, Ckm, Thra, Dusp3, Rhoq, Slc9a6, Dmpk, Frmpd1                                                                                                                                                                                                                                                                                                                                                                    |
| V\$AP1_01                   | 16(776)                | 9,36E-05                 | Ppp2r5b, Gstp1, Dhrs3, Nrip3, Cdkn1a, Lmna, Cpa6, Snx10, Dtx2, Rab3d, Slc22a18, Rit1, Gabarapl1, Abcd1, Abcb6, Mrgprf                                                                                                                                                                                                                                                                                                                                                                                                               |
| V\$NFE2_01                  | 18(776)                | 0,000136971              | Gstp1, Dhrs3, Nrip3, Cdkn1a, Cobl, Camkk1, Cpa6, Snx10, Scrn1, Dtx2, Tob1, Rab3d, Slc22a18, Rit1, Gabarapl1, Synpo, Abcd1, Abcb6                                                                                                                                                                                                                                                                                                                                                                                                    |
| V\$FREAC2_01                | 33(776)                | 0,000162716              | Hr, Npdc1, Pdgfc, Rab43, Ank2, Gabarapl2, Bmp4, Dhrs3, Hoxa1, Cdkn1a, Hapb4, Asah1, C1qtnf6, Ephb3, Rora, Ppt2, Pkia, Dab2ip, Fstl1, Scrn1, Ube2h, Grik2, Hhip, Ezh1, Map3k8, Tob1, Pbxip1, Thra, Rhoq, Synpo, Clstn1, Pde6d, Mrgprf                                                                                                                                                                                                                                                                                                |
| V\$HEB_Q6                   | 15(776)                | 0,000173938              | L1cam, Pmp22, Fbxl20, Dhrs3, Hist1h3d, Mapk4, Tgfb2, Dlg2, Nfe2l1, Ufm1, Ckm, Usp2, Slc1a4, Rasl12, Mrgprf                                                                                                                                                                                                                                                                                                                                                                                                                          |
| V\$TCF11MAFG_01             | 20(776)                | 0,000178281              | Satb1, Ero1l, Gstp1, Slc35b1, Hd1bp, Rnf13, Uchl1, Camkk1, Snx10, Atp2a3, Nkiras2, Dtx2, Grik2, Atp6v0a1, Tob1, Mrc2, Slc22a18, Gabarapl1, Pcyt1a, Abcb6                                                                                                                                                                                                                                                                                                                                                                            |
| V\$AP1_Q6                   | 15(776)                | 0,000182228              | Ltpb3, Dhrs3, Nrip3, Cdkn1a, Cobl, Camkk1, Lmna, Cpa6, Scrn1, Ecm1, Rab3d, Sparc, Rit1, Dmpk, Abcd1                                                                                                                                                                                                                                                                                                                                                                                                                                 |
| V\$TEF1_Q6                  | 22(776)                | 0,000188792              | Mfap5, Bmp4, Cryab, Ehd1, Slc31a2, Rapsn, Lmna, Add3, Dlg2, Fstl1, Myadm, Kif1c, Cacna1g, Lamb2, Mtss1, Jund, Rras, Pbxip1, Sparc, Usp2, Dmpk, Mrgprf                                                                                                                                                                                                                                                                                                                                                                               |
| V\$MEF2_02                  | 29(776)                | 0,000266816              | Stard6, Kcnn1, Myom2, Cryab, Cdkn1a, Vamp3, Lmna, Dlg2, Esrrb, Atp2a3, Lama2, Cat, Gadd45b, Timp2, Ndel1, Klf15, Sgcb, Cog6, Grik2, Lamb2, Stac, Gpc4, Ckm, Usp2, Rhoq, Camk1, Cox6a2, Dmpk, Slc35c2                                                                                                                                                                                                                                                                                                                                |
| V\$ELK1_02                  | 34(776)                | 0,000507657              | Rab4b, Ufc1, Agl, Gabarapl2, Nagk, Mkrn1, Mtcp1, Acyp1, Sirt2, Arhgap1, Asb1, Rnf13, Galnt10, Samd8, Sema3f, Acp2, Tcta, Nfs1, Dab2ip, Mcl1, Mef2b, Nkiras2, Insig2, Srp14, Ing4, Bace1, Itgb1bp1, Rras, Ufm1, Rhoq, Dscr3, Pcyt1a, Mlycd, Slc35c2                                                                                                                                                                                                                                                                                  |
| V\$ATF3_Q6                  | 23(776)                | 0,000578038              | Qpct, Zbtb4, Ppp2r5b, Rhoj, Adra1b, Cdkn1a, Ehd1, Sh3bgr, Ndufb2, Maoa, Ndel1, Ube2h, Ing4, Cacna1g, Hhip, Mtss1, Jund, Ndufa10, Pbxip1, Dusp3, Gabarapl1, Zdhhc8, Mrgprf                                                                                                                                                                                                                                                                                                                                                           |
| V\$AREB6_02                 | 14(776)                | 0,000580571              | Slc6a7, Fads3, S100a16, Camkk1, Dlg2, S100a1, Rragc, Wnt9a, Wwp2, Crat, Usp2, Cox6a2, Dmpk, Dgkg                                                                                                                                                                                                                                                                                                                                                                                                                                    |

| <i>Transcription Factor</i> | <i>Number of genes</i> | <i>Corrected p-value</i> | <i>Genes induced in Rasless cells (from Table S1)</i>                                                                                                                                                                                                     |
|-----------------------------|------------------------|--------------------------|-----------------------------------------------------------------------------------------------------------------------------------------------------------------------------------------------------------------------------------------------------------|
| V\$MYC_Q2                   | 32(776)                | 0,0005886                | Hexa, Aldh6a1, Fads3, Bmp4, Ankrd12, Tom1, Hoxa1, Arl2, Gabarap, Nrip3, Cbara1, Fabp3, Commd8, Slc31a2, Tgfb2, Sema3f, Camkk1, Gsk3b, Atp6v0b, Rragc, Mtus1, Gadd45b, Psen2, Camk4, Tom1l2, Hhip, Wwp2, Dirc2, Usp2, Mpv17, Znrf2, Abcb6                  |
| V\$TCF1P_Q6                 | 13(776)                | 0,00102772               | Satb1, Dusp8, Zbtb4, Cdkn1a, Tuba8, Rbms2, Dlg2, Mtss1, App, Usp2, Slc9a6, Frmpd1, Mrgprf                                                                                                                                                                 |
| V\$ETS2_B                   | 35(776)                | 0,00103851               | Qpct, Stk10, C1qtnf5, Arhgef12, Rab43, Ltbp3, Dhps, Srr, Vps39, Rhoj, Hoxa1, Apba1, Cdkn1a, Ndrgr4, C1qtnf6, Sema3f, Rbms2, Galnt2, Creb3, Rora, Atp2a3, Cdk5, Dab2ip, Fstl1, Impdh1, Wnt9a, Wwp2, Ecm1, Gpc4, Itpr2, Sparc, Fzd6, Slc35c2, Znrf2, Frmpd1 |
| V\$E4BP4_01                 | 15(776)                | 0,00105635               | Gabarapl2, Uchl1, Arnt, Atp2a3, Impdh1, Hist3h2a, Rasl10b, Ube2h, Ensa, Prnp, Tob1, Plcb1, Usp2, Slc35c2, Clstn1                                                                                                                                          |
| V\$ATF4_Q2                  | 13(776)                | 0,00171272               | Ppp2r5b, Nrip3, Selm, Gsk3b, Pkia, Maoa, Ube2h, Ecm1, Ndufa10, Dirc2, Usp2, Abcd1, Mrgprf                                                                                                                                                                 |
| V\$AP1_Q2_01                | 14(776)                | 0,00193938               | Ltbp3, Cdkn1a, Cobl, Lmna, Cpa6, Snx10, Impdh1, Ndel1, Klf15, Sema3b, Rit1, Mpv17, Ntn4, Mrgprf                                                                                                                                                           |
| V\$CP2_01                   | 13(776)                | 0,00211979               | Satb1, Hr, Pmp22, Ltbp3, Dhrs3, Atp2a3, Dab2ip, Dbp, Kif1c, Lamb2, Rhoq, Prelp, Pank2                                                                                                                                                                     |
| V\$BACH1_01                 | 13(776)                | 0,00295799               | Fads3, Cdkn1a, Camkk1, Lmna, Scrn1, Ecm1, Rab3d, Sparc, Gabarapl1, Mpv17, Ntn4, Abcd1, Mrgprf                                                                                                                                                             |
| V\$GABP_B                   | 25(776)                | 0,0031409                | Stk10, Rab4b, Ufc1, Agl, Bmp4, Ttc15, Hoxa1, Mtcp1, Arhgap1, Slamf9, Galnt10, Acp2, Rbms2, Creb3, Tcta, Cdk5, Nkiras2, Iscu, Dtx2, Rab2b, Ing4, Nme2, Gpc4, Itpr2, Kif3b                                                                                  |
| V\$FOXO1_02                 | 12(776)                | 0,00314616               | Hr, Dhrs3, Hoxa1, Cdkn1a, Ehd1, Rora, Fstl1, Ezh1, Sh2d4a, Thra, Clstn1, Mrgprf                                                                                                                                                                           |
| V\$NRF1_Q6                  | 26(776)                | 0,0033216                | Slc6a7, Npdc1, Zbtb4, Srr, Cacna1b, Ehd1, Akap13, Samd8, Abhd5, Tcta, Napb, Mef2b, Iscu, Mocs2, Nr2c1, Sgcb, Cog6, Snrpn, Vps24, Itgb1bp1, Cdkn2b, Kif3a, Stx8, Tollip, Abcb6, Kpna1                                                                      |
| V\$USF_01                   | 12(776)                | 0,00343012               | Aldh6a1, Bmp4, Ankrd12, Tom1, Hoxa1, Gabarap, Nrip3, Commd8, Slc31a2, Gsk3b, Tom1l2, Dirc2                                                                                                                                                                |
| V\$MYOD_Q6                  | 30(776)                | 0,00345492               | Hr, Arhgef12, Ppp2r5b, Ank2, Chrd, Lhfp12, Ehd1, Fabp3, Rnf13, Cobl, Galnt2, Rapsn, Camkk1, Gsk3b, Dlg2, Dab2ip, Rragc, Mtus1, Kif13b, Serf2, Adamts5, Plcb1, Crat, Ckm, Usp2, Dmpk, Ntn4, Mlycd, Rabac1, Tpcn1                                           |
| V\$IK2_01                   | 13(776)                | 0,00359605               | Pdgfc, Pmp22, Cryab, Sema3f, Rbms2, Vamp3, Rora, Napb, Pkia, Slc35a2, Gpc4, Usp2, Slco3a1                                                                                                                                                                 |
| V\$ETS1_B                   | 12(776)                | 0,00393904               | Stk10, Rab43, Vps39, Bmp4, Hoxa1, Apba1, Rbms2, Galnt2, Dab2ip, Impdh1, Kif1c, Itpr2                                                                                                                                                                      |
| V\$HEN1_02                  | 10(776)                | 0,00401444               | Ank2, Loxl1, Bmp4, Galnt10, Adamts2, Capn5, Impdh1, Rasl10b, Abtb2, Mrgprf                                                                                                                                                                                |
| V\$SOX5_01                  | 12(776)                | 0,00426268               | Ank2, Slc35b1, Dhrs3, Apba1, Ephb3, Dlg2, Fstl1, Hhip, Tob1, Gpc4, Mrc2, Plcb1                                                                                                                                                                            |
| V\$USF_02                   | 12(776)                | 0,00532941               | Dusp8, Aldh6a1, Ankrd12, Gabarap, Nrip3, Commd8, Slc31a2, Tgfb2, Vnn1, Tom1l2, Fzd6, Rhoq                                                                                                                                                                 |
| V\$ZIC3_01                  | 12(776)                | 0,0063057                | Fbxl20, Dhrs3, Cryab, Uchl1, Vamp3, Lmna, Fstl1, Mtus1, Impdh1, Sema3b, Thra, Mrgprf                                                                                                                                                                      |
| V\$NFY_Q6_01                | 32(776)                | 0,00652561               | Fzd8, Aldh6a1, Rab4b, Bmp4, Ankrd12, Acyp1, Cacna1b, Sh3bgr, C1qtnf6, Smad6, Ugp2, Gsk3b, Dlg2, Tcta, Dbp, Atp10d, Cat, Hist3h2a, Ensa, Lancl1, Dleu2, Ap3m2, Pxmp4, Itpr2, Abtb2, Usp2, Rhoq, Cox6a2, Mlycd, Tpcn1, Pde6d, Pank2                         |
| V\$NF1_Q6_01                | 12(776)                | 0,00746437               | Fbxl20, Loxl1, Rhoj, Jdp2, Smad6, Lmna, Lgals9, Lamb2, Crot, Mtss1, Rras, Rhoq                                                                                                                                                                            |

| <i>Transcription Factor</i> | <i>Number of genes</i> | <i>Corrected p-value</i> | <i>Genes induced in Rasless cells (from Table S1)</i>                                                                                                                                                                                                |
|-----------------------------|------------------------|--------------------------|------------------------------------------------------------------------------------------------------------------------------------------------------------------------------------------------------------------------------------------------------|
| V\$AREB6_01                 | 27(776)                | 0,00751332               | Wispl2, Pdgfc, Rab43, Bmp4, Dhrr3, Hist1h3d, Gabarap, Repin1, Ndrq4, Uchl1, Tgfb2, Sema3f, Camkk1, Dlg2, Slc37a4, Kif1c, Rab2b, Cacna1g, Gpc4, Tbc1d14, Plcb1, Usp2, Thra, Fn1, Zdhhc8, Mpv17, Lynx1                                                 |
| V\$ER_Q6                    | 12(776)                | 0,00765758               | Satb1, Pmp22, Slc35b1, Gabarapl2, Tuba8, Esrrb, Iscu, Myadm, Vps24, Gpc4, Ckm, Dusp3                                                                                                                                                                 |
| V\$SMAD3_Q6                 | 11(776)                | 0,00844641               | C1qtnf5, S100a16, Cdkn1a, Tgfb2, Smad6, Cdk5, Mrc2, Crat, Dusp3, Dmpk, Synpo                                                                                                                                                                         |
| V\$CMYB_01                  | 11(776)                | 0,00869454               | Hr, Aldh6a1, Tom1, Add3, Gsk3b, Slc39a3, Ube2h, Jund, Gpc4, Crat, Usp2                                                                                                                                                                               |
| V\$LHX3_01                  | 13(776)                | 0,00877256               | Jdp2, Stx7, Smad6, Sema3c, Rora, Add3, Rab22a, Slc37a4, Wnt9a, Rasl10b, Hhip, Mtss1, Tob1                                                                                                                                                            |
| V\$SRF_Q6                   | 12(776)                | 0,00877953               | Agl, Rhoj, Hoxa1, Emilin2, Cacna1b, Myadm, Ckm, Prepl, Dmpk, Dgkg, Prkab2, Mrgprf                                                                                                                                                                    |
| V\$HIF1_Q5                  | 11(776)                | 0,00889888               | Slc6a7, Ero1l, Selm, Ephb3, Creb3, Rora, Ppt2, Slc37a4, Gadd45b, Abcb6, Cdc42ep2                                                                                                                                                                     |
| V\$EN1_01                   | 7(776)                 | 0,00903432               | Ank2, Klf15, Ube2h, Atp9b, Rab2b, Gpc4, Plcb1                                                                                                                                                                                                        |
| V\$CREB_Q4_01               | 10(776)                | 0,00904348               | Rbms2, Ndufb2, Maoa, Iscu, Ube2h, Hhip, Jund, Usp2, Rhoq, Mrgprf                                                                                                                                                                                     |
| V\$SP1_01                   | 11(776)                | 0,00928348               | Srr, Nagk, Gabarap, Cryab, Mtmr3, Camkk1, Nfe2l1, Myadm, Kif1c, Mtss1, Clstn1                                                                                                                                                                        |
| V\$E2F1_Q3_01               | 11(776)                | 0,00928348               | Satb1, Hr, Arhgef12, Aldh6a1, Vamp3, Reck, Elmo2, Fbxo9, Dleu2, Mrc2, Usp2                                                                                                                                                                           |
| V\$LFA1_Q6                  | 11(776)                | 0,00956039               | Rab4b, Gabarap, Npc2, Gsk3b, Kif1c, Cacna1g, Ppp1r16a, Bace1, Dmpk, Rasl12, Tpcn1                                                                                                                                                                    |
| V\$NRF2_01                  | 10(776)                | 0,010015                 | Ufc1, Agl, Arhgap1, Acp2, Nkiras2, Insig2, Dtx2, Ing4, Wwp2, Rras                                                                                                                                                                                    |
| V\$TATA_01                  | 35(776)                | 0,0100572                | Fzd8, Pdgfc, Srr, Klf2, Hd1bp, Cryab, Anxa1, Ehd1, Hist1h1e, Lyplal1, Uchl1, Tgfb2, Npc2, Fbln5, Sema3c, Rora, Tcta, Mtus1, Nkiras2, Slc37a4, Cables1, Gdf15, Ube2h, Stac, Ecm1, Tob1, Adamts5, Pltp, Ckm, Rit1, Fn1, Gpr133, Dmpk, Slc35c2, Slco3a1 |
| V\$CEBP_Q3                  | 11(776)                | 0,0101357                | Adamts2, Tgfb2, Arnt, Rora, Dlg2, Maoa, Hhip, Tob1, Gpc4, Pbxip1, Thra                                                                                                                                                                               |
| V\$ARNT_01                  | 11(776)                | 0,0102785                | Aldh6a1, Bmp4, Ankrd12, Hoxa1, Nrip3, Cbara1, Commd8, Tgfb2, Atp6v0b, Mtus1, Cry2                                                                                                                                                                    |
| V\$STAT5A_03                | 11(776)                | 0,0105823                | Satb1, Tbcd, Dhrr3, C1qtnf6, Slc35a2, Fbxo9, Ube2h, Mtss1, Tob1, Gpc4, Fn1                                                                                                                                                                           |
| V\$EVI1_01                  | 3(776)                 | 0,0110184                | Vamp3, Tob1, Crat                                                                                                                                                                                                                                    |
| V\$TCF11_01                 | 10(776)                | 0,0111079                | Jdp2, Rnf13, Dlg2, Rab22a, Slc41a2, Kif1c, Cdkn2b, Gpc4, Rit1, Mpv17                                                                                                                                                                                 |
| V\$STAT6_01                 | 11(776)                | 0,0118736                | Satb1, Tbcd, Dhrr3, Mapk4, C1qtnf6, Slc35a2, Fbxo9, Mtss1, Tob1, Gpc4, Fn1                                                                                                                                                                           |
| V\$PXR_Q2                   | 11(776)                | 0,0118736                | Dhrr3, Smad6, Ugp2, Gsk3b, Fstl1, Scrn1, Cables1, Cacna1g, App, Slc6a6, Lrch1                                                                                                                                                                        |

| <i>Transcription Factor</i> | <i>Number of genes</i> | <i>Corrected p-value</i> | <i>Genes induced in Rasless cells (from Table S1)</i>                                                                |
|-----------------------------|------------------------|--------------------------|----------------------------------------------------------------------------------------------------------------------|
| V\$PAX4_01                  | 11(776)                | 0,0154196                | Arhgef12, Rab43, Slc35b1, Suox, Hoxa1, Galnt10, Capn5, Iscu, Sema3b, Jund, Rras                                      |
| V\$ER_Q6_02                 | 11(776)                | 0,0154196                | Satb1, Gabarapl2, Hck, Cdkn1a, Creb3, Myadm, Vps24, Lamb2, Dusp3, Rhoq, Slco3a1                                      |
| V\$TFIIA_Q6                 | 11(776)                | 0,0167056                | Cspg4, Gabarapl2, Jdp2, Cryab, Lmna, Add3, Nkiras2, Anxa3, Sgca, Gpc4, Adamts5                                       |
| V\$AP1_Q4                   | 11(776)                | 0,0167056                | Ltpb3, Nrip3, Cdkn1a, Camkk1, Lmna, Esrrb, Scrn1, Dtx2, Usp2, Synpo, Abcb6                                           |
| V\$PTF1BETA_Q6              | 10(776)                | 0,0170972                | Npdc1, Pmp22, Dusp22, Dhrr3, Apba1, Repin1, Smad6, Impdh1, Hhip, Thra                                                |
| V\$MZF1_01                  | 10(776)                | 0,0170972                | Hr, Fbxl20, Ank2, Hoxa1, Nrip3, Add3, Gsk3b, Ap3s1, Tob1, Prepl                                                      |
| V\$GCM_Q2                   | 10(776)                | 0,0170972                | Ppp2r5b, Mfap5, Adra1b, Smad6, Add3, Fbxo9, Cacna1g, Pld1, Thra, Kpna1                                               |
| V\$ARP1_01                  | 8(776)                 | 0,0175343                | C1qtnf5, Fbxl20, Ltpb3, Hoxa1, Dbp, Ensa, Cacna1g, Sparc                                                             |
| V\$CREBP1_01                | 8(776)                 | 0,0178288                | Gabarapl2, Rbms2, Impdh1, Rasl10b, Prnp, Tob1, Usp2, Clstn1                                                          |
| V\$GATA1_02                 | 10(776)                | 0,0179157                | Satb1, Bmp4, Apba1, Rora, Ube2h, Ing4, Ap3s1, Amhr2, Cry2, Cdc42ep2                                                  |
| V\$USF2_Q6                  | 10(776)                | 0,0182286                | Fads3, Arl2, Nrip3, Cbara1, Fabp3, Tgfb2, Atp6v0b, Rragc, Psen2, Usp2                                                |
| V\$USF_Q6                   | 10(776)                | 0,0187721                | Hexa, Aldh6a1, Tom1, Hoxa1, Gabarap, Nrip3, Cbara1, Tom1l2, Dirc2, Mpv17                                             |
| V\$SOX9_B1                  | 16(776)                | 0,0190617                | Fbxl20, Mfap5, Apba1, Cdkn1a, Slc39a14, Fbln5, Dlg2, S100a1, Dab2ip, Fbn2, Kif1c, Mtss1, Maob, Adamts5, Tbc1d14, Fn1 |
| V\$TAL1ALPHA47_01           | 10(776)                | 0,0198954                | Scn1b, Gabarapl2, Hck, Hoxa1, Selm, Dtx2, Ap3s1, Riok3, Pbxip1, Plcb1                                                |
| V\$RFX1_02                  | 10(776)                | 0,0204756                | Ank2, Rpl17, Ehd1, Ppt2, Ap3m2, Pbxip1, Sparc, Dusp3, Camk1, Stx8                                                    |
| V\$AR_01                    | 7(776)                 | 0,0206069                | Pmp22, Cdkn1a, Rbms2, Dab2ip, Klf15, Abtb2, Usp2                                                                     |
| V\$EVI1_04                  | 10(776)                | 0,021433                 | Pdgfc, Dhrr3, Cryab, Ankra2, Tgfb2, Vamp3, Mtus1, Cables1, Ap3m2, Tob1                                               |
| V\$CEBPA_01                 | 10(776)                | 0,021433                 | Smad6, Arnt, Fbn2, Maoa, Fstl1, Hhip, Tob1, Gpc4, Thra, Rhoq                                                         |
| V\$MMEF2_Q6                 | 11(776)                | 0,0219037                | Klf2, Dhrr3, Ehd1, Add3, Dlg2, Tcta, Insig2, Ckm, Usp2, Zdhhc8, Dmpk                                                 |

| <b>Transcription Factor</b> | <b>Number of genes</b> | <b>Corrected p-value</b> | <b>Genes induced in Rasless cells (from Table S1)</b>                                                                          |
|-----------------------------|------------------------|--------------------------|--------------------------------------------------------------------------------------------------------------------------------|
| V\$ATF1_Q6                  | 10(776)                | 0,0220471                | Habp4, Ehd1, Smad6, Dlg2, Ube2h, Cacna1g, Hhip, Jund, Thra, Dusp3                                                              |
| V\$STAT6_Q2                 | 10(776)                | 0,0258523                | Satb1, Vps39, Rhoj, Atp5e, Vamp3, Mtus1, Nkiras2, Usp2, Zdhhc8, Znrf2                                                          |
| V\$PU1_Q6                   | 18(776)                | 0,0260521                | C1qtnf5, Hr, Tcn2, Fbxl20, Rhoj, Rpl17, Hoxa1, Slc39a14, Creb3, Rora, Add3, Atp2a3, Tcta, Impdh1, Rab2b, Cacna1g, Grik2, Itpr2 |
| V\$STAT_Q6                  | 10(776)                | 0,0265547                | Qpct, Agl, Mkrn1, Apba1, Add3, Nfs1, Slc41a2, Ube2h, Thra, Fn1                                                                 |
| V\$RSRFC4_Q2                | 16(776)                | 0,0269162                | Kcnn1, Myom2, Cdkn1a, Dlg2, Atp2a3, Timp2, Elmo2, Stac, Gpc4, Ckm, Usp2, Rhoq, Gpr133, Slco3a1, Pde6d, Cdc42ep2                |
| V\$AP3_Q6                   | 10(776)                | 0,0269897                | Mmaa, Hdllbp, Npc2, Rora, Fstl1, Wwp2, Jund, Sparc, Fn1, Mpv17                                                                 |
| V\$RSRFC4_Q1                | 10(776)                | 0,0277151                | Kcnn1, Ehd1, Dlg2, Atp2a3, Timp2, Stac, Gpc4, Ckm, Usp2, Slco3a1                                                               |
| V\$AP2REP_Q1                | 8(776)                 | 0,0277768                | Zbtb4, Ltbp3, Rhoj, Cobl, Rora, Ube2h, Pcsk6, Frmpd1                                                                           |
| V\$AP1_Q6_Q1                | 10(776)                | 0,0281699                | Nrip3, Lmna, Snx10, Scrn1, Tob1, Gabarapl1, Dmpk, Mpv17, Abcd1, Abcb6                                                          |
| V\$ZID_Q1                   | 9(776)                 | 0,0287602                | Hr, Gabarapl2, Chrd, Hist1h3d, C1qtnf6, Creb3, Iscu, Abtb2, Prelp                                                              |
| V\$GATA2_Q1                 | 6(776)                 | 0,0289335                | Rbms2, Ube2h, Grik2, Mpv17, Znrf2, Abcb6                                                                                       |
| V\$P53_DECAMER_Q2           | 10(776)                | 0,0291108                | Rab43, Cdkn1a, Anxa1, Add3, Dlg2, Dab2ip, Nkiras2, Nfe2l1, Abcd1, Slco3a1                                                      |
| V\$EGR2_Q1                  | 8(776)                 | 0,0291922                | Fbxl20, Chrd, Ephb3, Kif1c, Wwp2, Gpc4, Mrc2, Thra                                                                             |
| V\$AP2ALPHA_Q1              | 9(776)                 | 0,0348934                | Hr, Ppp2r5b, S100a16, Jund, Thra, Dmpk, Znrf2, Dgkg, Frmpd1                                                                    |
| V\$RP58_Q1                  | 9(776)                 | 0,0365516                | Ank2, Ankrd12, Adamts2, Wnt9a, Dtx2, C1qtnf1, Cacna1g, Cdc42ep2, Mrgprf                                                        |
| V\$TAL1BETA47_Q1            | 9(776)                 | 0,0365516                | Scn1b, Gabarapl2, Hck, Selm, Wnt9a, Dtx2, Riok3, Pbxip1, Plcb1                                                                 |
| V\$MYB_Q6                   | 9(776)                 | 0,0365516                | Ank2, Rab4b, Ssbp2, Rapsn, Tcta, Ube2h, Cacna1g, Fbxl2, Synpo                                                                  |
| V\$USF_C                    | 10(776)                | 0,0375398                | Fads3, Bmp4, Gabarap, Slc31a2, Psen2, Camk4, Hhip, Usp2, Znrf2, Abcb6                                                          |
| V\$ELF1_Q6                  | 9(776)                 | 0,0375737                | Dusp22, Ttc15, Rpl17, Creb3, Fbln5, Add3, Atp2a3, Myadm, Itpr2                                                                 |

| <i>Transcription Factor</i> | <i>Number of genes</i> | <i>Corrected p-value</i> | <i>Genes induced in Rasless cells (from Table S1)</i>                                           |
|-----------------------------|------------------------|--------------------------|-------------------------------------------------------------------------------------------------|
| V\$HEN1_01                  | 8(776)                 | 0,0395718                | Ank2, Loxl1, Bmp4, Capn5, Impdh1, Rasl10b, Abtb2, Mrgprf                                        |
| V\$OCT_C                    | 14(776)                | 0,0429247                | Arhgef12, Ephb3, Mtus1, Scrn1, Mras, Wnt9a, Hist3h2a, Jund, Rras, Sgca, Gpc4, Abtb2, Thra, Dgkg |
| V\$ZIC2_01                  | 9(776)                 | 0,0433534                | Hr, Dhrr3, Cryab, Rab22a, Fstl1, Mtus1, Impdh1, Sema3b, Usp2                                    |
| V\$MYC_MAX_03               | 9(776)                 | 0,0444984                | Hexa, Aldh6a1, Tom1, Hoxa1, Gabarap, Nrip3, Cbara1, Uchl1, Tgfb2                                |
| V\$AP1FJ_Q2                 | 10(776)                | 0,0450397                | Ltpb3, Nrip3, Camkk1, Lmna, Rab22a, Scrn1, Dtx2, Tob1, Usp2, Synpo                              |
| V\$PAX3_B                   | 8(776)                 | 0,046049                 | Klf2, Cdkn1a, Habp4, Ndufb2, Fbln5, Ppt2, Ndel1, Stxbp1                                         |
| V\$PPARA_02                 | 6(776)                 | 0,0461552                | Hr, Man2b1, Add3, Dlg2, Nkiras2, Kif1c                                                          |
| V\$SREBP1_02                | 5(776)                 | 0,0461704                | Loxl1, Dhrr3, Kif1c, Jund, Ntn4                                                                 |
| V\$GATA1_04                 | 9(776)                 | 0,047245                 | Ank2, Pon3, Rora, Esrrb, Pkia, Slc35a2, Ube2h, Amhr2, Synpo                                     |
| V\$FAC1_01                  | 8(776)                 | 0,0480052                | Fbxl20, Kcnc2, Gabarapl2, Gabarap, Mtmr3, Wnt9a, Klf15, Cacna1g                                 |
| V\$SRF_Q5_01                | 9(776)                 | 0,0480555                | Rhoj, Emilin2, Cacna1b, Myadm, Ube2h, Ckm, Dgkg, Prkab2, Mrgprf                                 |
| V\$AP4_01                   | 9(776)                 | 0,0480969                | Ank2, Ssbp2, Mtmr3, Rapsn, Gsk3b, Rasl10b, Klf15, Gpc4, Usp2                                    |
| V\$CREB_01                  | 9(776)                 | 0,0480969                | Rbms2, Ndufb2, Maa, Ube2h, Ing4, Hhip, Jund, Ndufa10, Mrgprf                                    |
| V\$STAT4_01                 | 9(776)                 | 0,0480969                | Satb1, Cspg4, Rhoj, Mtus1, Usp2, Fn1, Rhoq, Zdhhc8, Pde6d                                       |
| V\$YY1_Q6                   | 13(776)                | 0,0482511                | Zbtb4, Fzd8, Rab4b, Mtmr3, Arnt, Reck, Rab22a, Scrn1, Nfe2l1, Ensa, Ing4, Snrpn, Tbc1d14        |
| V\$P53_02                   | 9(776)                 | 0,0489325                | Ppp2r5b, Repin1, Cdkn1a, Anxa1, Dab2ip, Gadd45b, Mrc2, Plcb1, Crat                              |
| V\$COUP_01                  | 9(776)                 | 0,0489325                | Satb1, Aldh6a1, Slc7a7, Dhrr3, Selm, Lmna, Dab2ip, Dusp3, Tpcn1                                 |
| V\$PR_Q2                    | 9(776)                 | 0,0497807                | Tcn2, Ltpb3, Jdp2, Ssbp2, Wnt9a, Dtx2, Cacna1g, Wwp2, Znf2                                      |
| V\$AFP1_Q6                  | 9(776)                 | 0,0497807                | Agl, Hoxa1, Stx7, Sema3c, Rasl10b, Klf15, Ing4, Gpc4, Dmpk                                      |

**Table S3-miRNA. Functional annotation to “miRNA” of the induced, overexpressed genes of Rasless MEFs.**

| <i>miRNA name</i>     | <i>Number of genes</i> | <i>Corrected p-value</i> | <i>miRNA targets among genes induced in Rasless cells (from Table S1)</i>                                                                                                                                                                                                                                                                 |
|-----------------------|------------------------|--------------------------|-------------------------------------------------------------------------------------------------------------------------------------------------------------------------------------------------------------------------------------------------------------------------------------------------------------------------------------------|
| <b>mmu-miR-762</b>    | 47(776)                | 2,85E-10                 | Ppp1r16a,Yif1b,Sgca,Stmn3,Slc6a7,Hspa12a,Rab4b,Trpc7,Slc22a18,Lrrc51,Clstn1,Ppp2r5b,Crybb3,Copz2,Renbp,Adcy9,Dhrs1,Ephb3,Gstm2,Ccdc64,Ndel1,Grina,Zbtb4,Pbxip1,Rapsn,P4ha2,Snta1,Ppt2,Ascc1,Dusp8,Ergic3,Lims2,Ing4,Atp6v0b,Def8,Klf2,Tanc2,Tex264,Dpm2,Fbn2,Mras,Dhps,Prepl,Cdkn2b,Fbxw4,Cacna1b,2810428115Rik                           |
| <b>mmu-miR-770-3p</b> | 44(776)                | 7,19E-10                 | Yif1b,Stmn3,Slc6a7,Ascc2,Tmem41a,Nt5m,Clstn1,Ppp2r5b,Slc35a2,Trpt1,Btf3l4,Dgkg,Ttc15,Dph1,Itgb1bp1,Cspg4,Bphl,P4ha2,Lims2,Deb1,Rdh12,Os9,Naga,Npdc1,Necap2,Gabarap,Ahnak,Mrpl55,Glo1,Slc41a3,Spata21,Kif13b,Ssbp2,Hck,BC046404,Itfg3,Dhps,Igbb1,Scn1b,Tbc1d9b,Cyb5r3,Slc2a8,Ltbp3,Zfp704                                                  |
| <b>mmu-miR-666-5p</b> | 49(776)                | 1,44E-09                 | Mrc2,Zfand3,Sgca,Stmn3,Pef1,Ascc2,Adc,Birc7,S100a1,Trpc7,Alg14,Hexa,Atp6v0e,Emilin2,Cd81,Loxl1,1810020D17Rik,Anxa3,Skap2,Slc31a2,Gpr133,Slc44a1,Ttc15,Suox,Trappc2l,Gstk1,Galns,Ndufa10,Itgb1bp1,Arhgef12,Impdh1,Bphl,Snta1,Itp2r,Bbs5,Ctsb,Atp6v0b,Slc39a14,Sorbs3,Ptprm,Ndr4,181004619Rik,Dnajc4,Tbc1d9b,Rabac1,Cyb5r3,Pcsk6,Ltbp3,Npc1 |
| <b>mmu-miR-99a</b>    | 45(776)                | 1,71E-09                 | Ahnak2,Adra1b,Stmn3,Slc6a7,Alg14,Insig2,Cd81,Adamts5,Cd248,F630110N24Rik,Amhr2,1810020D17Rik,Tmco3,9430038I01Rik,Cdc42ep2,Sepw1,Hoxa1,Ndel1,Tcn2,Rora,Zbtb4,Nfe2l1,Impdh1,Serpinb9b,Ergic3,Mmaa,Fabp3,Adamtsl5,Zmat2,Tollip,Nol3,Plcb1,Ankrd29,Atp6v0b,App,Ahnak,Fzd8,Ptprm,2900026A02Rik,Tpp1,Igfbp2,Rhoj,Scn1b,Atp10d,Shroom3           |
| <b>mmu-miR-423-5p</b> | 44(776)                | 2,68E-09                 | 1300014I06Rik,Dtx2,S100a1,Trpc7,Cyp27a1,Clstn1,AI593442,Upk3b,Ppp2r5b,Akap13,Sgcb,Clip1,Qk,Ndel1,Gdf15,Shank3,L1cam,Man2b1,Rapsn,P4ha2,Ascc1,Dusp8,Rel2,2310046K01Rik,Os9,Ing4,Mtcp1,Frmpd1,Atp6v0b,Gabarap,Sorbs3,Fzd8,Ssbp2,Tex264,Slc25a39,Mras,Cdkn1a,Dhps,1810046J19Rik,Ckm,Lmna,Limch1,Ltbp3,Shroom3                                |
| <b>mmu-miR-34c</b>    | 46(776)                | 5,73E-09                 | Ahnak2,Ifi35,Rpl17,Fbxo9,Nt5m,Hexa,Sh3bgr,Rras,Wnt9a,D16H22S680E,Stk39,Sync,Nudt13,Nfs1,Vps39,Slc31a2,9430038I01Rik,Ttc15,Ccdc64,Suox,Guk1,Galns,Arl2,Nfe2l1,Pbxip1,Bphl,Nrip3,Lims2,Glt8d1,Rel2,Mtcp1,Plcb1,Ankrd29,Acyp2,Tex264,Slc2a6,Ptprm,Dpm2,Itfg3,Mras,Nhlrc1,Wscd2,Chst12,Lmna,Dusp22,Zfp704                                     |
| <b>mmu-miR-24</b>     | 43(776)                | 1,07E-08                 | 1300014I06Rik,Ecm1,Rab4b,Gabarapl2,Hexa,Rras,Ehd1,Emilin2,Cd81,Kcnn1,Cyp4v3,Neu1,Iqsec2,Abcd1,BC027231,Appl2,Chrd,Rapsn,P4ha2,Dusp8,Lrrc57,Htra3,Slc35c2,S100a13,Itp2r,Os9,Naga,Necap2,Def8,Clip4,Tex264,Slc25a39,Mras,Clcn7,Scarb2,Tom1l2,Slc25a35,Atp5e,Fbxw4,Cpeb1,1810030N24Rik,Tmub2,Ltbp3                                           |
| <b>mmu-miR-337-3p</b> | 42(776)                | 1,31E-08                 | Zfand3,Maob,Sgca,Plb1,Pef1,Mal,Fbxo9,Papss2,Alg14,Sh3bgr,Elmo2,Wnt9a,Cd81,Abcb6,Acox1,Slc35a2,Tbcd,Adcy9,BC027231,Clip1,Ephb3,Myom2,Gstk1,Chrd,Cspg4,Mtap6,Snta1,Cables1,C330006K01Rik,Mlycd,Bbs5,BC089491,Slc39a14,Clip4,Nr2c1,Csrp2,Scarb2,Gas6,Slamf9,Fbxw4,Fads3,Nagk                                                                 |
| <b>mmu-miR-504</b>    | 42(776)                | 1,41E-08                 | Ppp1r16a,Dtx2,Usp2,Cox4nb,Prss29,D16H22S680E,Kcnn1,Tgfb2,Adcy9,9830001H06Rik,Lmbr1,Camk1,Alkbh6,Myom2,Lgals9,Tpcn1,Arl2,Nipa1,Tcn2,Grina,Shank3,Epb4.1I4b,Idua,Rdh12,Adamtsl5,Nkiras2,Naga,Tollip,Gpc4,Ankrd29,0610037L13Rik,Atp6v0b,Zfand2b,Sirt2,Slc2a6,Ikkg,BC046404,Igfbp2,Fbxw4,Limch1,Pcsk6,Aldh3a2                                 |
| <b>mmu-miR-30a*</b>   | 41(776)                | 3,88E-08                 | Sqrdl,Adc,Prss29,Nt5m,Cyp4v3,Cd248,Trappc6a,Dusp3,Calm1,Sepw1,Tob1,Ndufa10,Epb4.1I4b,Mtap6,P4ha2,Hist1h1e,Dusp8,Lrrc57,Iscu,Ccdc80,Slc22a4,Bbs5,Sned1,Nol3,Pde6d,Pltp,Srr,Slc26a11,Tanc2,Acyp2,Asb1,Ptprm,Mxra7,Vps24,Cpa6,BC004004,Adamtsl4,Gas6,Slamf9,1810030N24Rik,Cox6b1                                                             |
| <b>mmu-miR-122</b>    | 41(776)                | 4,22E-08                 | Dtx2,Stmn3,Adc,Mpv17,Sema3b,Nt5m,Sh3bgr,Atp6v0e,R74862,1810020D17Rik,Vps8,Dgkg,Lama2,Slc46a3,Rragc,2010003O02Rik,Ccdc64,Arl2,Gdf15,C1qtnf6,P4ha2,Serpinb9b,Cables1,Iscu,Psen2,Dopey2,Pde6d,Plcb1,Sh2d4a,Pxmp4,Ankrd29,Pdia5,Vps24,BC046404,Fbxl20,Htatip2,Arhgap1,Acyp1,Cpeb1,Ltbp3,Immp1l                                                |
| <b>mmu-miR-18a</b>    | 44(776)                | 5,42E-08                 | Kif27,Lgr4,Cox4nb,Ascc2,Mpv17,Cyp27a1,Rras,Wnt9a,D16H22S680E,Inpp5a,AI593442,Smad6,Cam1,Mydm,Tbcd,Akap13,Renbp,Adcy9,Skap2,Slc44a1,Fbxl2,Herpud2,Arhgef12,Slc35b1,2700078K21Rik,Serpinb9b,Sec22c,Iscu,Glt8d1,Rel2,Adamtsl5,Abtb2,Srp14,Ahnak,Cxcr7,Ikkg,Ufc1,Cpa6,Cbara1,Acaa1a,Cpeb1,Ltbp3,Uchl1,Nagk                                    |
| <b>mmu-miR-423-3p</b> | 41(776)                | 7,44E-08                 | Dtx2,Commd8,Pef1,Prss29,Rab4b,Gpx4,Cyp27a1,Gabarapl2,Rras,Elmo2,Ehd1,Clstn1,Crybb3,F630110N24Rik,Qk,Dph1,Mapk4,Ndel1,Rora,Nme2,Htra3,Adar,Atg4a,Adamtsl5,Mustn1,Necap2,2010111I01Rik,Gabarap,I17d,Kif13b,Atp5s,Slc25a39,Slc2a6,Vps24,Csrp2,Mras,Igfbp2,Gas6,Slc2a8,Ltbp3,Aldh3a2                                                          |
| <b>mmu-miR-133b</b>   | 43(776)                | 7,46E-08                 | Mrc2,Eif5a2,Ifi35,Sqrdl,Adc,Slc39a3,Rras,Clstn1,Slc35a2,F630110N24Rik,Akap13,Gramd3,Klk1b4,Txnrd3,Fbxl2,Appl2,Guk1,Arl2,Grina,Nfe2l1,Cspg4,Wwp2,Ehd3,Serpinb9b,Nrip3,Ttll7,Iscu,Rel2,Garnl3,Rdh12,Slc2a4,Atg7,Ahnak,Slc25a39,Slc2a6,Serf2,Dpm2,Csrp2,Scarb2,Gas6,Slamf9,Cacna1b,2810428115Rik                                             |

| <i>miRNA name</i>      | <i>Number of genes</i> | <i>Corrected p-value</i> | <i>miRNA targets among genes induced in Rasless cells (from Table S1)</i>                                                                                                                                                                                                                                                   |
|------------------------|------------------------|--------------------------|-----------------------------------------------------------------------------------------------------------------------------------------------------------------------------------------------------------------------------------------------------------------------------------------------------------------------------|
| <b>mmu-miR-671-5p</b>  | 44(776)                | 7,51E-08                 | Ppp1r16a,Sqrdl,Yif1b,Slc37a4,Plb1,Prss29,Magi3,Rras,Krt80,Nudt13,Atp9b,Atp6v1e1,Dynlrb1,Akap13,Clip1,Txnrd3,Zbtb4,Nfe2l1,Impdh1,Slc35b1,Rapsn,Bphl,Ascc1,Idua,Ehd3,Nrip3,Mfap5,Ly6c1,Ing4,Hscb,Ctsb,201011101Rik,Atp6v0b,Ikbgk,Hck,Cog6,Dhps,Tom1l2,Igfbp2,Atp6v0a1,Chst12,Pcsk6,Ltbp3,Shroom3                              |
| <b>mmu-miR-673-3p</b>  | 42(776)                | 7,84E-08                 | Dtx2,Kif27,Prss29,Sema3b,Hexa,5930434B04Rik,Mtap1a,Gadd45b,Loxl1,Trappc6a,Iqsec2,Crybb3,Renbp,Abcd1,Adcy9,Vps8,Sepw1,Cacna1g,Ephb3,Ccdc64,Gstk1,Hsd3b3,Wisp2,Ypel3,Shank3,Nfe2l1,Pbxip1,2700078K21Rik,Snta1,Pon3,Pltp,Necap2,Mrpl55,Fbn2,Mras,Scarb2,Rabac1,Uchl1,Yif1a,Cacna1b,Shroom3,Ankr44                              |
| <b>mmu-miR-214</b>     | 44(776)                | 1,13E-07                 | Pank2,Mrc2,Ifi35,Rab43,Stmn3,Slc37a4,Snrpn,Arvcf,Rab4b,Lrrc51,Rras,Cd81,Atp6v1e1,Iqsec2,Dusp3,Gramd3,Skap2,Arl2,Tcn2,Itgb1bp1,Shank3,Pbxip1,Mtap6,Nudt7,Slc35c2,S100a13,Ly6c1,Sh2d4a,Ctsb,1300010F03Rik,Atp6v0b,BC029214,Uqcrcq,Slc25a39,Cbara1,Dnajc4,Tbc1d14,Atp6v0a1,Rit1,Rabac1,Cyb5r3,Ltbp3,Fads3,2810428115Rik        |
| <b>mmu-miR-100</b>     | 39(776)                | 1,13E-07                 | Fech,Ahnak2,Adra1b,Stmn3,Alg14,Insig2,Rab40b,Znrf2,Adamts5,Smad6,Sync,F630110N24Rik,Amhr2,1810020D17Rik,Clip1,Tmco3,Mxra8,9430038I01Rik,Cdc42ep2,Sepw1,Hoxa1,Tcn2,Rora,Impdh1,Ergic3,Fabp3,Zmat2,Nol3,Plcb1,Atp6v0b,App,Ahnak,Clip4,Fzd8,Ptprm,Tpp1,Scn1b,Dusp22,Shroom3                                                    |
| <b>mmu-miR-125b-3p</b> | 44(776)                | 1,13E-07                 | Mrc2,Iah1,Col14a1,Sgca,Dhrs3,Alg14,Sema3b,Nt5m,Trpv4,Lamb2,Vps39,Dusp3,Amhr2,Copz2,Clip1,Camk1,Ttc15,Ephb3,Myom2,Txnrd3,Tpcn1,Tcn2,Ndufa10,Itgb1bp1,Chrd,Zbtb4,Rapsn,Snta1,Lims2,Os9,S100a16,Sned1,Mustn1,Zfand2b,Asb1,Tex264,Slc25a39,Ptprm,Cdh7,Nudt18,Adamts4,Scarb2,Ltbp3,Mtus1                                         |
| <b>mmu-miR-330</b>     | 40(776)                | 1,16E-07                 | Adc,Prss29,Sema3b,Hexa,Emilin2,Cd81,Ppapdc3,Smad6,Klf15,Iqsec2,Acox1,Copz2,Dab2ip,Tbcd,Arrres2,Clip1,Lgals9,Ccdc64,Idua,Ergic3,Tmem175,Mlycd,Itp2,Ing4,Cryab,Tm9sf4,Zfand2b,Def8,Cyb5,Ptprm,Fbxl20,Gpr39,Acaa1a,Nhlrc1,Wscd2,Atp6v0a1,Rabac1,Lmna,Yif1a,Aph1a                                                               |
| <b>mmu-miR-30c-1*</b>  | 40(776)                | 1,19E-07                 | Copg,Kif27,Ascc2,S100a1,Fahd2a,Smpd3a,R74862,Clstn1,Prss36,Ppapdc3,Vps39,Copz2,Arrres2,Dhrs1,Tmco3,Arnt,Txnrd3,Arl2,Ypel3,Shank3,2700078K21Rik,Nupr1,Ly6c1,Ing4,Gdap2,Pde6d,Ctsb,Slc25a39,Ptprm,Iftfg3,Csrp2,Mras,1810046J19Rik,Tom1l2,Slamf9,Atp6v0a1,1810030N24Rik,Wdr7,Cacna1b,1700094D03Rik                             |
| <b>mmu-miR-323-5p</b>  | 42(776)                | 1,23E-07                 | Ppp1r16a,Zfand3,Cat,Pef1,Tmem41a,Magi3,Rbms2,Habp4,Dscr3,Clstn1,Smad6,Tgfb2,F630110N24Rik,Copz2,Tbc1d22a,Tor3a,Plid1,Vps8,Anxa3,Sepw1,Myo6,Galns,Arl2,Tcn2,Impdh1,P4ha2,Ascc1,Dusp8,Fabp3,Garnl3,Mlycd,Pde4dip,Rab7l1,Asb1,Ufc1,Htatip2,Adamts4,Kif3a,Gas6,Uchl1,Cacna1b,2810428115Rik                                      |
| <b>mmu-miR-883b-5p</b> | 44(776)                | 1,24E-07                 | Zfand3,Snap91,2310028O11Rik,Stmn3,Hspa12a,Gyg,Tlr6,Gabarapl2,Rab38,Cobl,Aldh7a1,Sh3bgr,Wnt9a,D16H22S680E,Fn1,Cyp4v3,Sync,Trpv4,Iqsec2,Crybb3,Amhr2,Myadm,Adcy9,1810020D17Rik,Vps8,Anxa3,Skap2,Ttc15,Slc9a6,Gp1bb,Cables1,Lims2,Glt8d1,2310046K01Rik,1300010F03Rik,BC029214,Asb1,Glipr1,Hck,Dpm2,Cdkn1a,Acaa1a,Zfp704,Tmem9b |
| <b>mmu-miR-693-3p</b>  | 40(776)                | 1,40E-07                 | Ppp1r16a,Rab4b,Elmo2,Ehd1,Emilin2,Clstn1,Nudt13,Nfs1,Creb3,Trappc6a,Dynlrb1,Akap13,Adcy9,BC027231,Skap2,Arl2,Dusp8,Deb1,Ppm1h,Ccdc80,Anxa1,Vdac1,Nkiras2,Pcyt1a,Ctsb,Hgsnat,Srp14,Isca2,Mrpl55,Tanc2,Ufc1,Iftfg3,Scarb2,Fbxw4,Wdr7,Rabac1,Pcsk6,Zfp704,Nagk,Shroom3                                                         |
| <b>mmu-miR-666-3p</b>  | 41(776)                | 1,55E-07                 | Zfand3,Yif1b,Usp2,Adc,Dhrs3,Nt5m,Krt80,Inpp5a,Hdlbp,Trpv4,Nudt13,Slc35a2,F630110N24Rik,Armc8,Rragc,Arl2,Itgb1bp1,Arhgef12,Tom1,Impdh1,Snta1,St3gal5,Mocs2,Ttll7,Bbs5,Ing4,Nenf,Npdc1,Asb1,Sema3f,Hck,BC046404,Dpm2,Ckm,Gas6,1500011K16Rik,Fbxw4,Rabac1,Slc2a8,Pcsk6,Dmpk                                                    |
| <b>mmu-miR-30e*</b>    | 39(776)                | 1,69E-07                 | Sqrdl,Adc,Prss29,Cyp4v3,Cd248,Dusp3,Calm4,Sepw1,Myom2,Tob1,Ndufa10,Mtap6,Idua,Dusp8,Lrrc57,Iscu,Deb1,Ccdc80,Lrch1,Bbs5,Sned1,Nol3,Pde6d,Pltp,Mtm1,Slc26a11,Acyp2,Asb1,Nr2c1,Ptprm,Mxra7,Vps24,Cpa6,BC004004,Adamts4,Gas6,Slamf9,1810030N24Rik,Cox6b1                                                                        |
| <b>mmu-miR-676</b>     | 37(776)                | 1,88E-07                 | Zfand3,Pmp22,Cox4nb,Trpc7,Alg14,Lrrc51,Rras,Atp6v0e,Atp6v1e1,Cd248,F630110N24Rik,Dusp3,Copz2,Dgkg,Slc31a2,5830405N20Rik,Rasl12,Grina,Ypel3,L1cam,Rel2,2310046K01Rik,Nupr1,Naga,Vnn1,BC089491,Mustn1,Ankrd29,Slc41a3,Acyp1,Cog6,2900026A02Rik,Cdkn2b,Igfbp1,Atp6v0a1,Stxbp1,1700094D03Rik                                    |
| <b>mmu-miR-744</b>     | 42(776)                | 1,89E-07                 | Ahnak2,Adc,Rab4b,Lrrc51,Elmo2,Emilin2,Creb3,F630110N24Rik,Pigz,Sepw1,Cacna1g,Myo6,Ephb3,Gstm2,Arl2,Tcn2,Ndufa10,Itgb1bp1,Zbtb4,Pbxip1,2700078K21Rik,Snta1,Rdh12,Plcb1,4930523C07Rik,Pde4dip,Zfand2b,Uqcrcq,Ptprm,1110034G24Rik,1810046J19Rik,Ckm,Fbxw4,Scn1b,Atp6v0a1,Camkk1,Rabac1,Pcsk6,Cox6b1,Uchl1,Mtus1,2810428115Rik  |
| <b>mmu-miR-449c</b>    | 41(776)                | 2,07E-07                 | Ifi35,Thra,Pmp22,Zdhhc4,Tcta,Magi3,Fbxo9,Nt5m,Hexa,Rras,Slc16a9,Nfs1,Vps39,Akap13,1110007C09Rik,Trpt1,Cry2,Ttc15,Pdgcf,Gstm2,Suox,Galns,Rora,Shank3,St3gal5,Mocs2,Mfap5,Fabp3,Rel2,1300010F03Rik,Def8,Acyp2,Tex264,Cog6,Mras,Tom1l2,Wscd2,Scn1b,Tubb2a,Zfp704,1700094D03Rik                                                 |
| <b>mmu-miR-145</b>     | 39(776)                | 2,23E-07                 | Snap91,Copg,Fahd2a,Nt5m,Fem1a,D16H22S680E,Nudt13,Loxl1,Nfs1,Vps39,Slc35a2,Lhfp2,Myo6,Rora,Csppg4,Myeov2,Slc35b1,C1qtnf6,Nudt7,Lrrc57,Nrip3,Lims2,Pik3ip1,Ccdc80,1110003E01Rik,Rdh12,Slc22a4,Os9,Abtb2,Npdc1,Lrp4,Atp6v0b,BC046404,1810027O10Rik,Dpm2,Csrp2,Cpeb1,Mdfic,Lrsam1                                               |
| <b>mmu-miR-764-3p</b>  | 40(776)                | 2,24E-07                 | Sqrdl,Yif1b,Copg,Plb1,Slc6a7,Prss29,Rras,Wnt9a,Scrn1,Atp6v1e1,Crybb3,Copz2,Renbp,Trpt1,Arnt,Txnrd3,2900010M23Rik,Tpcn1,Tob1,Snta1,2310046K01Rik,Ing4,Naga,S100a16,Gpc4,Lrp4,Atp6v0b,Sorbs3,Sirt2,Hck,1110034G24Rik,Cox6a2,Igfbp2,Scn1b,Tmub2,Chst12,Pcsk6,Uchl1,Dmpk,Shroom3                                                |



| <i>miRNA name</i>      | <i>Number of genes</i> | <i>Corrected p-value</i> | <i>miRNA targets among genes induced in Rasless cells (from Table S1)</i>                                                                                                                                                                                                                                 |
|------------------------|------------------------|--------------------------|-----------------------------------------------------------------------------------------------------------------------------------------------------------------------------------------------------------------------------------------------------------------------------------------------------------|
| <b>mmu-miR-877</b>     | 35(776)                | 2,52E-07                 | Copg,Sgca,Tcta,Rab4b,Rab3d,Sh3bgr,Cd81,Caml,Iqsec2,Slc7a7,Adcy9,Pld1,Pigz,Ccny,Al317395,Mkrm1,Gstm2,Qpct,Tcn2,Slc35b1,Rapsn,Lims2,Pon3,Fabp3,Tollip,Tanc2,Slc41a3,Nr2c1,Vps24,Cbara1,Ckm,Slc25a35,Gas6,2610019F03Rik,Cox6b1                                                                               |
| <b>mmu-miR-124</b>     | 43(776)                | 2,56E-07                 | Pank2,Mrc2,Ugp2,Dtx2,Ascc2,Rras,Dscr3,Al593442,Trpv4,Klf15,Tbcd,Abcd1,Adcy9,Trpt1,Dhrs1,Skap2,Slc31a2,Lgals9,Synpo,Suox,Trappc2l,Gstk1,Chrd,Hsd3b3,P4ha2,Snta1,2700078E11Rik,Grik2,Mlycd,Ing4,Mtm1,Grk4,Impact,Cyb5,Slc25a39,Ptprm,Sema3f,Hck,BC046404,Htatip2,Itfg3,Tbc1d14,Cacna1b                      |
| <b>mmu-miR-99b</b>     | 38(776)                | 2,62E-07                 | Maob,Slc6a7,Alg14,Cd81,Znrf2,Abcb6,Kif1c,F630110N24Rik,Amhr2,Tmco3,Cdc42ep2,Hoxa1,Atp2a3,Tcn2,Wisp2,Rora,Zbtb4,Impdh1,Ppt2,Serpib9b,Pik3ip1,Zmat2,Sned1,Nol3,Ankrd29,Pde4dip,Atp6v0b,App,Ahnak,Tmed8,Fzd8,Ptprm,Ckm,Tpp1,Igfbp2,Scn1b,Mtus1,Shroom3                                                       |
| <b>mmu-miR-34b-5p</b>  | 42(776)                | 2,68E-07                 | Dym,Ecm1,Rpl17,Fbxo9,Nt5m,Hexa,Sh3bgr,Rras,Sync,Nudt13,Nfs1,Vps39,9430038I01Rik,Ttc15,Tpcn1,Trim36,Suox,Arl2,Nfe2l1,Pbxip1,Bphl,Ppt2,Serpib9c,Nrip3,Glt8d1,Rel2,Bbs5,Mtcp1,Plcb1,Ankrd29,Pde4dip,Acyp2,Tex264,Ptprm,Itfg3,Cog6,Mras,Acaa1a,Nhlrc1,Wscd2,Zfp704,1700094D03Rik                              |
| <b>mmu-miR-194</b>     | 40(776)                | 2,71E-07                 | Pank2,Kif27,Gyg,Fahd2a,Rab4b,Tlr6,Nt5m,Sh3bgr,Emilin2,Cd81,Sync,Atp6v1e1,Tbcd,Adcy9,Vps8,2010003O02Rik,Hsd3b3,Igta9,Stard6,Slc9a6,Bphl,Ppt2,Nudt7,Tmem175,Psen2,Adamtsl5,Os9,Dner,Isca2,BC029214,Glo1,Tbccd1,Nr2c1,Ufc1,1110034G24Rik,Kif3a,Hadhb,Fzd6,Rabac1,Uchl1                                       |
| <b>mmu-miR-337-5p</b>  | 38(776)                | 3,12E-07                 | Ppp1r16a,Dym,Zfand3,Thra,Cat,Slc6a7,Tmem41a,Rab4b,Aldh7a1,Emilin2,Dscr3,Vps39,Ank2,Slc35a2,Tbcd,Skap2,Ndel1,Ndufa10,Slc9a6,Rapsn,P4ha2,Iscu,Ppm1h,Tmem154,Itpr2,Dopey2,Dner,Plcb1,BC029214,Abhd5,Pcbd2,Rab71l,Slc25a39,Htatip2,Ckm,Gdap1,Tbc1d9b,1700021C14Rik                                            |
| <b>mmu-miR-139-5p</b>  | 41(776)                | 3,27E-07                 | Ppp1r16a,Zfand3,Thra,Map3k8,Slc6a7,Adc,Dhrs3,Trpc7,Nt5m,Rab11fip5,Emilin2,Inpp5a,Neu1,Lmbr1,Guk1,Qpct,Impdh1,Myeov2,Sec22c,Tmem175,Rel2,Psen2,Hbxip,Dopey2,Tollip,Plcb1,Sh2d4a,Pxmp4,Gpc4,Rab71l,Tbccd1,Uqcrq,Ssfa2,Fbn2,Acyp1,Cog6,1810030N24Rik,2610019F03Rik,Mdfic,Vps29,1700094D03Rik                 |
| <b>mmu-miR-693-5p</b>  | 42(776)                | 3,74E-07                 | Stmn3,Slc6a7,Rbms2,Abcb6,Prss36,Nfs1,Atp6v1e1,Trappc6a,Iqsec2,Slc35a2,Renbp,Pld1,Btf3l4,Lyplal1,Lyrm1,Ero1l,Sepw1,Ypel3,Shank3,P4ha2,Ppt2,Ascc1,Nudt7,Nrip3,Fabp3,Mlycd,Vdac1,Dner,Ctsb,0610037L13Rik,Srp14,Slc41a3,Cyb5,Tmbim1,Glipr1,1810046J19Rik,Scarb2,Stx7,Pcsk6,Ltbp3,Uchl1,Aldh3a2                |
| <b>mmu-miR-31</b>      | 39(776)                | 3,84E-07                 | Dtx2,Pef1,Ascc2,Tmem41a,Rras,Abcb6,Cyp4v3,Loxl1,Vps39,Slc35a2,Lyrm1,Dhrs1,Myom2,Herpud2,Lnx1,Ypel3,2700078K21Rik,Mtap6,Wwp2,Ppt2,Serpib9c,Nrip3,Zdhhc8,Nkiras2,Atg7,Trip1,Grk4,Ahnak,Rab71l,Asb1,Vps24,Trp53inp2,Cdh7,1110034G24Rik,Igfbp1,Atp6v0a1,Tbc1d9b,Atp10d,Shroom3                                |
| <b>mmu-miR-17</b>      | 43(776)                | 3,84E-07                 | Map3k8,Adc,D16H22S680E,Smad6,Caml,Loxl1,Creb3,Armc8,Dok4,Mapk4,Rora,Pbxip1,Nudt7,Idua,St3gal5,Dusp8,2700078E11Rik,Serpib9b,Mfap5,Htra3,Adamtsl5,Bbs5,Ing4,Ntn4,Dbp,Mmab,App,Ahnak,Tmed8,Clip4,Synpo2,Nr2c1,Chmp4c,Ufc1,Fbxl20,Cbara1,Acaa1a,Nhlrc1,Uchl1,Zfp704,Atp10d,Nagk,Ankrd44                       |
| <b>mmu-miR-742</b>     | 38(776)                | 4,11E-07                 | Gtf2h5,Sqrdl,Map3k8,Col14a1,Prss29,Crot,Coq10a,Fbxo9,Fem1a,Sh3bgr,Atp6v0e,Wnt9a,Smad6,Cyp4v3,Tmem64,Nfs1,Lyplal1,Ankra2,Zbtb4,Stard6,C1qtnf6,P4ha2,Fabp3,Gdap2,5530400B01Rik,Pde6d,Atp6v0b,Def8,Slco3a1,Uqcrq,Ikbg,BC046404,Mras,Nudt18,Wscd2,Cyb5r3,Lmna,Ltbp3                                           |
| <b>mmu-miR-105</b>     | 39(776)                | 4,86E-07                 | Gtf2h5,Sgca,Kif27,Mpv17,Lactb2,Alg14,Elmo2,Napb,Kcnn1,Trpv4,Crybb3,Dab2ip,Myo6,Dok4,Tcn2,Ypel3,Pbxip1,C1qtnf6,Serpib9b,Ulk2,Slc22a4,Os9,Akap4,Mtm1,Atp6v0b,Glo1,Rab71l,Ptprm,Ikbg,Chmp4c,Csrp2,Mras,Sh3tc2,Cdkn1a,Cox6a2,Hadhb,Cpeb1,Wdr7,Uchl1                                                           |
| <b>mmu-miR-29a</b>     | 44(776)                | 5,02E-07                 | Rnf13,Copg,Ccdc126,Slc37a4,Pmp22,Adc,Arvcf,Gpx4,Smpd3a,Hexa,Sh3bgr,Habp4,Emilin2,Abcb6,Smad6,Trpv4,Tgfb2,Vps8,Ephb3,Myom2,Dok4,Tpcn1,Pdgc,Chrd,Impdh1,Asah1,Mfap5,Ccdc80,9130011J15Rik,Ing4,Grk4,Sh3glb1,Atp6v0b,Abhd5,Klf2,Tanc2,Chmp4c,Sh3tc2,Dhps,9930013L23Rik,Gas6,Cpeb1,Tubb2a,Dusp22               |
| <b>mmu-miR-152</b>     | 41(776)                | 5,36E-07                 | Dym,Snrpn,Gabarapl2,Hexa,Sh3bgr,Lamb2,Mtmr3,Sgcb,Rragc,5830405N20Rik,Gstm2,Suox,Galns,Grina,Ypel3,Pbxip1,Ascc1,Nudt7,Nrip3,Akap4,Dner,Mtm1,Gpc4,Ankrd29,Srp14,Pde4dip,Atp6v0b,Acyp2,Slc2a6,Cdh7,Mras,Sh3tc2,Stx7,Cdkn2b,Slamf9,Rhoj,1810030N24Rik,Zfp704,Dmpk,Tmem9b,1700094D03Rik                        |
| <b>mmu-miR-7a</b>      | 38(776)                | 5,54E-07                 | Bri3,Cat,Smpd3a,Insig2,Lrrc51,Rab38,Sh3bgr,Atp6v1e1,Creb3,Tgfb2,Ank2,Pld1,Camk1,Sepw1,Tpcn1,Herpud2,Tcn2,Grina,Shank3,Nudt7,Slc6a8,Hbxip,Bbs5,Pcyt1a,Pltp,4930523C07Rik,Pxmp4,Atp6v0b,Slc25a39,Nr2c1,Cog6,Tpp1,Tmub2,Limch1,Uchl1,1700094D03Rik,Atp10d,Shroom3                                            |
| <b>mmu-miR-181a-2*</b> | 36(776)                | 5,58E-07                 | Gtf2h5,Wdr47,Pmp22,Cox4nb,Tmem41a,Tmem135,Habp4,Ehd1,Fn1,Sync,F630110N24Rik,Pld1,Vps8,Qk,Calm4,Rragc,Gstm2,Galns,Nfe2l1,Riok3,Adar,Garnl3,Nkiras2,Trip1,2010111I01Rik,Isca2,Zfand2b,Tanc2,Uqcrq,Ptprm,Scarb2,Slc25a35,Tmem38a,Limch1,Aldh3a2,Shroom3                                                      |
| <b>mmu-miR-324-3p</b>  | 42(776)                | 5,79E-07                 | Mrc2,Stmn3,Hadha,Birc7,Khl18,Hexa,Rbms2,Habp4,D16H22S680E,Rab40b,Loxl1,Kif1c,Slc7a7,Abcd1,Pld1,Cry2,Myom2,Tpcn1,Nfe2l1,Impdh1,Man2b1,Mtap6,Ascc1,Megf6,Cdk5,Rel2,Mlycd,S100a13,Ing4,S100a16,4930523C07Rik,Pxmp4,Slc41a3,Sema3f,Chmp4c,1110034G24Rik,Cox6a2,1810046J19Rik,9930013L23Rik,Igfbp2,Scn1b,Chpt1 |
| <b>mmu-miR-92a*</b>    | 34(776)                | 6,52E-07                 | Pank2,Ecm1,Adc,S100a1,Rab4b,Rras,Elmo2,Stam2,Clstn1,Slc44a1,Sepw1,Repin1,Gstm2,Ccdc64,Arl2,Tcn2,Grina,Shank3,Mfap5,Adar,Rel2,Os9,Ly6c1,Tollip,Pltp,Dbp,Atp6v0b,Ckm,Slamf9,Scn1b,Chst12,Slc2a8,Uchl1                                                                                                       |

| <i>miRNA name</i>      | <i>Number of genes</i> | <i>Corrected p-value</i> | <i>miRNA targets among genes induced in Rasless cells (from Table S1)</i>                                                                                                                                                                                                               |
|------------------------|------------------------|--------------------------|-----------------------------------------------------------------------------------------------------------------------------------------------------------------------------------------------------------------------------------------------------------------------------------------|
|                        |                        |                          | 1,Dmpk                                                                                                                                                                                                                                                                                  |
| <b>mmu-miR-125b*</b>   | 35(776)                | 6,86E-07                 | Rab43,Cat,Smpdl3a,Slc22a18,Rab3d,Aldh7a1,Habp4,Krt80,Tgfb2,Arnt,Ttc15,Dok4,Tpcn1,Snta1,Cables1,Ttl17,Ccdc80,Glt8d1,Rell2,Slc22a4,Srp14,Slc26a11,1300010F03Rik,Cyb5,Tex264,Ptprm,Ikbg,Trp53inp2,Cog6,Csrp2,1810046J19Rik,1500011K16Rik,Yif1a,Tmem9b,1700094D03Rik                        |
| <b>mmu-miR-680</b>     | 38(776)                | 7,06E-07                 | Ahnak2,Thra,Yif1b,Kif27,Adc,Sema3b,Nt5m,Sh3bgr,4833439L19Rik,Creb3,Cd248,Trappc6a,Slc35a2,Tmem87b,Sepw1,Ephb3,Gstm2,Ccdc64,Ndufa10,Dlg2,Wisp2,Zbtb4,Cspg4,L1cam,Pbxip1,Wwp2,P4ha2,Ppt2,Pik3ip1,Itp2,Ly6c1,Mtcb1,Mustn1,Dbp,BC029214,Fzd8,1810046J19Rik,Mtss1                            |
| <b>mmu-miR-20a</b>     | 41(776)                | 7,38E-07                 | Ugp2,Kif27,Slc6a7,Adc,Crot,Smad6,Caml,Neu1,Creb3,Ank2,Armc8,2010003O02Rik,Rora,Pbxip1,Nudt7,Idua,St3gal5,Dusp8,2700078E11Rik,Serpib9c,Serpib9b,Mfap5,Htra3,Adamts5,Ing4,Ntn4,Srp14,App,Ahnak,Clip4,Rab71l1,Nr2c1,Chmp4c,Ufc1,Cbara1,Acaa1a,Mdfic,Uchl1,Zfp704,Nagk,Ankrd44              |
| <b>mmu-miR-449a</b>    | 39(776)                | 8,95E-07                 | Tcta,Magi3,Fbxo9,Hexa,Rras,Mtap1a,Nudt13,Nfs1,Vps39,1110007C09Rik,Trpt1,Lyplal1,Ttc15,Suox,Galns,Arl2,Zbtb4,Tom1,Ppt2,St3gal5,Mocs2,Nrip3,Mfap5,Fabp3,Rell2,Mtcb1,4930523C07Rik,1300010F03Rik,Chid1,Acyp2,Asb1,Tex264,Cog6,Mras,Wscd2,Rhoj,Scn1b,Tubb2a,1700094D03Rik                   |
| <b>mmu-miR-689</b>     | 37(776)                | 9,68E-07                 | Ifi35,Thra,2310028O11Rik,Cd81,Kcnn1,Ppapdc3,Upk3b,Iqsec2,F630110N24Rik,Dusp3,Pigz,Grina,Arhgef12,Gp1bb,Ppt2,Pde6d,4930523C07Rik,Dbp,Ankrd29,Npdc1,Lrp4,Tm9sf4,Slc39a14,Sorbs3,Sirt2,Cyb5,Fzd8,Se3ma3f,Fbxl20,1110034G24Rik,BC004004,2900026A02Rik,Cdkn1a,Slamf9,Scn1b,Ltbp3,Dmpk        |
| <b>mmu-miR-290-5p</b>  | 40(776)                | 9,80E-07                 | Crat,Zfand3,Commd8,Rab4b,Fem1a,Znrf2,Hist2h2bb,Hdlbp,Loxl1,Cd248,Slc35a2,Vps8,Btf3l4,Slc44a1,Tcn2,Zbtb4,L1cam,Man2b1,Asah1,Tmem154,Glt8d1,Dner,Plcb1,Pxmp4,Gpc4,Zfand2b,Gabarap,Mrpl55,Fzd8,Tuba8,Fbxl20,BC004004,Acyp1,Dhps,1810046J19Rik,1810030N24Rik,Slc2a8,Limch1,Shroom3,Ankrd44  |
| <b>mmu-miR-133a</b>    | 39(776)                | 1,24E-06                 | Mrc2,Eif5a2,Sqrdl,Adc,Slc39a3,Rras,Clstn1,Ppapdc3,Slc35a2,F630110N24Rik,Akap13,Gramd3,Klk1b4,Txnrd3,App12,Guk1,Arl2,Grina,Cspg4,Ehd3,Serpib9b,Nrip3,Tll7,Iscu,Rell2,Garnl3,Rdh12,Slc22a4,Atg7,Ahnak,Slc2a6,Serf2,Dpm2,Csrp2,Scarb2,Gas6,Slamf9,Cacna1b,281042815Rik                     |
| <b>mmu-miR-106a</b>    | 40(776)                | 1,25E-06                 | Map3k8,Usp2,Adc,Smad6,Caml,Armc8,Myom2,2010003O02Rik,Herpud2,Ndel1,Rora,Stard6,Pbxip1,Nudt7,St3gal5,Dusp8,2700078E11Rik,Mmaa,Htra3,Ing4,Ntn4,Dbp,Galc,App,Ahnak,Clip4,Chmp4c,Ufc1,Fbxl20,Arhgap1,Cog6,Clcn7,Cbara1,Acaa1a,1500011K16Rik,Uchl1,Zfp704,Atp10d,Nagk,Ankrd44                |
| <b>mmu-miR-717</b>     | 37(776)                | 1,39E-06                 | Fech,Thra,Tssc4,Stmn3,9030409G11Rik,Caml,Cd248,F630110N24Rik,Vps8,Skap2,Arnt,Slc31a2,Tpcn1,Gstm2,Guk1,Wisp2,Myeov2,Aldh6a1,P4ha2,Ehd3,Add3,Glt8d1,Tmem175,S100a16,Hgsnat,Npdc1,Mrpl55,Acyp2,Uqcrq,Sema3f,Mras,Scarb2,Rabac1,Ltbp3,Uchl1,Vps29,1700094D03Rik                             |
| <b>mmu-miR-188-5p</b>  | 38(776)                | 1,64E-06                 | 1300014I06Rik,Ppp1r16a,Zfp78,Dtx2,Slc6a7,Tmem41a,Tlr6,Abcb6,Stam2,Loxl1,Cd248,Trappc6a,Slc7a7,Adcy9,Sgcb,Camk1,Gpr133,Cacna1g,Myo6,Suox,Arl2,Slc35b1,Lrrc57,Vdac1,Slc22a4,Itp2,Hgsnat,Gabarap,Ahnak,Uqcrq,Cdh7,Irf3,Ckm,Acaa1a,Afap12,Atp6v0a1,Limch1,Atp10d                            |
| <b>mmu-miR-883a-3p</b> | 40(776)                | 1,76E-06                 | Ugp2,Snap91,Bri3,Sgca,Hadha,Adc,Tmem41a,Nt5m,Wnt9a,Rab40b,Fn1,Clstn1,Akap13,Renbp,Fstl1,BC027231,Anxa3,Skap2,Ttc15,Wisp2,Stard6,Impdh1,Mocs2,Iscu,Trak1,Naga,Ctsb,Adamts2,Atp6v0b,Sstr4,Sirt2,1110034G24Rik,Clcn7,1810046J19Rik,Acaa1a,Scarb2,Fbxw4,Rhoj,Hint3,Atp10d                   |
| <b>mmu-miR-302b</b>    | 38(776)                | 2,18E-06                 | Ifi35,Maob,Magi3,Glrb,Emilin2,Loxl1,Dhrs1,Ttc15,Rragc,2010003O02Rik,Dlg2,Nudt7,2700078E11Rik,Serpib9b,9130011J15Rik,S100a13,Akap4,Tripa1,Pxmp4,Impact,1810037I17Rik,Clip4,Rab71l1,Synpo2,Nr2c1,Ikbg,Ufc1,BC004004,Csrp2,Mras,Sh3tc2,Cdkn1a,Tpp1,Wdr7,Uchl1,Zfp704,1700094D03Rik,Ankrd44 |
| <b>mmu-miR-291a-3p</b> | 40(776)                | 2,30E-06                 | Camk4,Magi3,Crot,Smad6,Loxl1,Crybb3,Dab2ip,Ttc15,Txnrd3,Dlg2,Arhgef12,Nudt7,St3gal5,2700078E11Rik,Serpib9b,Ehd2,Glt8d1,9130011J15Rik,Ing4,Tollip,Impact,Lrp4,Ahnak,Clip4,Rab71l1,Uqcrq,Nr2c1,Ikbg,Ufc1,Csrp2,Sh3tc2,Acaa1a,Nhlrc1,Wdr7,Uchl1,Zfp704,Immp1,Atp10d,Mtss1,Ankrd44          |
| <b>mmu-miR-224</b>     | 38(776)                | 2,36E-06                 | Rnf13,Adc,Fbxo9,Smpdl3a,Alg14,Slc22a18,Ehd1,Wnt9a,Dscr3,Kcnn1,Nfs1,Ank2,Mrgprf,Tmco3,Qk,Atp2a3,Nipa1,Ypel3,L1cam,Idua,St3gal5,Itp2,Apba1,Plcb1,Mtm1,Gpc4,Atp6v0b,Rab71l1,Kif13b,Ikbg,Hck,Ssfa2,Csrp2,Cdkn1a,Dusp22,Tmem9b,Atp10d,Aldh3a2                                                |
| <b>mmu-miR-532-3p</b>  | 39(776)                | 2,36E-06                 | Ppp1r16a,Mrc2,Maob,Adra1b,Usp2,Kif27,Slc6a7,Dhrs3,Selm,Rras,Clstn1,Prss36,Upk3b,Mtmr3,Tgfb2,Crybb3,F630110N24Rik,Pld1,Tmem87b,Ptad2,Arnt,Ankra2,Slc31a2,Cacna1g,Lgals9,Zbtb4,Slc9a6,St3gal5,Cdk5,Atg4a,Npdc1,App,Spata21,Hck,Acaa1a,Wscd2,Scn1b,Chst12,Aph1a                            |
| <b>mmu-miR-351</b>     | 37(776)                | 2,36E-06                 | Ppp1r16a,Pank2,Oit3,Stmn3,Plb1,Kif27,Cd81,Abcb6,Dusp3,Adcy9,1700009P17Rik,Slc46a3,Ypel3,Shank3,Rapsn,Glt8d1,Psен2,Mlycd,Ing4,Dopey2,Pxmp4,Ankrd29,Npdc1,Lrp4,BC029214,Mrpl55,Kif13b,Synpo2,Ikbg,Hck,Irf3,Sh3tc2,Slc25a35,Slamf9,Fbxw4,Ltbp3,Atp10d                                      |
| <b>mmu-miR-665</b>     | 36(776)                | 2,89E-06                 | Stmn3,Slc6a7,Prss29,Rras,Dscr3,Krt80,Klf15,Slc35a2,Pld1,Sepw1,Cacna1g,Lgals9,Hsd3b3,Wisp2,Nfe2l1,Pbxip1,Snta1,Ascc1,Deb1,Adar,Akap4,Ahnak,Tex264,Htatip2,Irf3,Arhgap1,Sparc,Mras,Cox6a2,Ckm,Mtss1,Scarb2,Tom1l2,Atp5e,Chst12,Slc2a8                                                     |

| <i>miRNA name</i>      | <i>Number of genes</i> | <i>Corrected p-value</i> | <i>miRNA targets among genes induced in Rasless cells (from Table S1)</i>                                                                                                                                                                                                                                      |
|------------------------|------------------------|--------------------------|----------------------------------------------------------------------------------------------------------------------------------------------------------------------------------------------------------------------------------------------------------------------------------------------------------------|
| <b>mmu-miR-125a-5p</b> | 40(776)                | 2,96E-06                 | Ppp1r16a,Pank2,Plb1,Kif27,Kremen1,Rab38,Upk3b,Vps39,Mtmr3,Tgfb2,Amhr2,Akap13,Adcy9,Dgkg,Klk1b4,Dhrs1,Slc46a3,Gpr133,Grina,Shank3,Tom1,Rapsn,P4ha2,Capn5,Rel2,Vnn1,Zfand2b,Slc2a6,Ikbkg,Hck,Irf3,Acp1,Sh3tc2,Slc25a35,Fbxw4,Tmem38a,1700021C14Rik,Pcsk6,Ltpb3,Mtus1                                             |
| <b>mmu-miR-345-5p</b>  | 37(776)                | 3,06E-06                 | Mrc2,Zfand3,Thra,Tssc4,Sgca,Kif27,Pef1,Slc6a7,Tcta,Magi3,Dhrs3,Atp6v1e1,Tor3a,Ptplad2,Mxra8,Ttc15,Galns,Farp2,Chrd,Shank3,4933439F18Rik,Nfe2l1,Cspg4,Snta1,Idua,Adar,S100a16,Plcb1,Tm9sf4,Nr2c1,Ufm1,Cbara1,9930013L23Rik,Slamf9,Scn1b,Cacna1b,Npc1                                                            |
| <b>mmu-miR-764-5p</b>  | 38(776)                | 3,06E-06                 | Ahnak2,Plb1,Ascc2,Hexa,Elmo2,Sync,Renbp,Armc8,Pigz,Slc46a3,Arnt,2900010M23Rik,Pdgfc,Trim36,Arl2,Tcn2,Snta1,Htra3,Tmem175,Slc22a4,S100a13,Akap4,Galc,1300010F03Rik,Pdia5,Clip4,Rab7l1,Hck,Chmp4c,Clcn7,Cox6a2,Tom1l2,Igfbp2,Tmub2,Limch1,Pcsk6,Uchl1,Atp10d                                                     |
| <b>mmu-miR-18b</b>     | 38(776)                | 3,18E-06                 | Ccdc126,Cox4nb,Ascc2,Cyp27a1,Rras,Wnt9a,D16H22S680E,Inpp5a,AI593442,Smad6,Myadm,Tbcd,Akap13,Slc7a7,Clip1,Fbxl2,Synpo,Herpud2,Arhgef12,Slc35b1,Dusp8,Glt8d1,Rel2,Adamts15,Ctsb,Abtb2,Necap2,Srp14,Ikbkg,Ufc1,1110034G24Rik,Cpa6,Irf3,Acaa1a,Cpeb1,Uchl1,Yif1a,Nagk                                              |
| <b>mmu-let-7d*</b>     | 37(776)                | 3,19E-06                 | Pank2,Zfand3,Dtx2,Iah1,Col14a1,Sgca,Slc37a4,Sh3bgr,Abcb6,AI593442,Caml,Atp9b,Renbp,Slc7a7,Pld1,Btf3l4,Myom2,Synpo,Gdf15,Mtap6,Pon3,Fabp3,Psen2,Trak1,Plcb1,Ctsl,App,Tbcd11,Ssbp2,Sema3f,Ufc1,Igfbp2,Esrrb,Rit1,Wdr7,Dusp22,Zfp704                                                                              |
| <b>mmu-miR-200a</b>    | 40(776)                | 3,19E-06                 | Ugp2,Lgr4,Gyg,Crot,Rab38,Fn1,Cyp4v3,Upk3b,Lamb2,Vps39,Akap13,Lyplal1,Lmbr1,Tmco3,Riok3,P4ha2,Ppt2,Ascc1,Nudt7,St3gal5,Lrrc57,2700078E11Rik,Nrip3,Ppm1h,Ccdc80,Slc35c2,Pltp,1300010F03Rik,Tanc2,Cyb5,6530401N04Rik,Asb1,Ssfa2,1810046J19Rik,Daglb,9930013L23Rik,Wdr7,1700094D03Rik,Npc1,Chpt1                   |
| <b>mmu-miR-96</b>      | 38(776)                | 3,20E-06                 | Ahnak2,Rpl17,Pef1,Magi3,Insig2,Elmo2,Abcb6,Neu1,Cd248,Tgfb2,Lyplal1,Anxa3,Myom2,Lnx1,Gp1bb,Ccdc80,Garnl3,Itp2,Ntn4,Vnn1,Pltp,Ctsb,Ankrd29,Cryab,Tm9sf4,Tsc22d3,Zfand2b,Ahnak,Mrp155,Cyb5,Slc2a6,Vps24,1110034G24Rik,Igfbp1,Cpeb1,C1qtnf1,Hhip,Ankrd44                                                          |
| <b>mmu-miR-196a</b>    | 39(776)                | 3,25E-06                 | Pank2,Crat,Ahnak2,Dtx2,Col14a1,Mpv17,Trpc7,Habp4,Fn1,Atp6v1e1,Dynlrb1,Gng5,Lmbr1,Lama2,Alkbh6,Ttc15,2900010M23Rik,Suox,Arl2,Slc9a6,Myeov2,Bphl,Riok3,Dusp8,Ergic3,Cdk5,Deb1,Anxa1,Def8,Ahnak,Ugt2b36,Uqcrq,Glipr1,Cpa6,Csrp2,Mras,Tyrp1,1810046J19Rik,Hint3                                                    |
| <b>mmu-miR-29c</b>     | 41(776)                | 3,39E-06                 | Copg,Ccdc126,Slc37a4,Pmp22,Adc,Arvcf,Smpdl3a,Hexa,Sh3bgr,Habp4,Emilin2,Abcb6,Smad6,Trpv4,Tgfb2,Vps8,Ephb3,Dok4,Tpcn1,Pdgfc,Chrd,Impdh1,Ascc1,Mfap5,Ccdc80,Fabp3,9130011J15Rik,Ing4,Grk4,Sh3glb1,Adamts2,Abhd5,Klf2,Chmp4c,Sh3tc2,Dhps,9930013L23Rik,Gas6,Cpeb1,Tubb2a,Dusp22                                   |
| <b>mmu-miR-466c-5p</b> | 44(776)                | 3,65E-06                 | Adra1b,Copg,Usp2,Plb1,Ecm1,Snrpn,Coq10a,Fbxo9,Insig2,Nt5m,Elmo2,Habp4,Sync,Lamb2,Amhr2,Akap13,Slc46a3,Bmp4,Calml4,Lgals9,Suox,Wisp2,Zbtb4,Man2b1,2700078K21Rik,Nrip3,Hectd3,C330006K01Rik,Rdh12,Slc22a4,Ly6c1,Nol3,Plcb1,Mtm1,Gabarap,Il17d,Ssbp2,Tuba8,ORF63,Acp1,Mras,Kif3a,Daglb,Top1                       |
| <b>mmu-miR-205</b>     | 35(776)                | 4,08E-06                 | Acp2,Tssc4,Rab43,Magi3,Gabarapl2,Adamts5,AI593442,Prss36,F630110N24Rik,Slc7a7,Abcd1,1700009P17Rik,Ttc15,Rora,C1qtnf6,Mtap6,Mocs2,Lrrc57,Mfap5,Lims2,Itp2,Naga,BC089491,Nenf,Plcb1,Abtb2,Grk4,Mrp155,4930579G22Rik,Fbn2,Mras,Ckm,Igfbp2,Camkk1,Tmem38a                                                          |
| <b>mmu-miR-93</b>      | 38(776)                | 4,35E-06                 | Thra,Kif27,Adc,Tmem41a,Atp6v0e,Smad6,Cyp4v3,Caml,Neu1,Loxl1,Myom2,2010003O02Rik,Pbxip1,Idua,St3gal5,Tmem154,Adamts15,Ntn4,Mtm1,Srp14,1300010F03Rik,Gabarap,Ahnak,Clip4,Synpo2,Chmp4c,Ufc1,Arhgap1,Csrp2,Cbara1,Cdkn1a,Acaa1a,Nhlrc1,1500011K16Rik,Uchl1,Zfp704,Nagk,Ankrd44                                    |
| <b>mmu-miR-151-5p</b>  | 37(776)                | 4,37E-06                 | Thra,Dtx2,Col14a1,Usp2,Ecm1,S100a1,Rbms2,Slc16a9,Clstn1,Trpv4,Nudt13,Iqsec2,Dynlrb1,Gramd3,Rragc,Sepw1,Igfb1bp1,Cspg4,Snta1,Nudt7,Dusp8,Pon3,Fabp3,Serinc3,Ing4,Pde6d,Sorbs3,Clip4,Asb1,Plac9,Nr2c1,Vps24,Clcn7,Slamf9,Chst12,C1qtnf1,Zfp704                                                                   |
| <b>mmu-miR-743a</b>    | 36(776)                | 4,80E-06                 | Iah1,Stmn3,Cat,Lgr4,Ascc2,Insig2,Sh3bgr,Iqsec2,Dynlrb1,Ankra2,Npy6r,Myom2,2010003O02Rik,Ctso,Qpct,Stard6,Alas1,P4ha2,Ascc1,Idua,St3gal5,Ulk2,Vnn1,Grk4,Slc26a11,1700016M24Rik,Tanc2,Uqcrq,Ikbkg,Vps24,Chmp4c,Mras,Cpeb1,Rabac1,Cox6b1,Zfp704                                                                   |
| <b>mmu-miR-574-5p</b>  | 36(776)                | 5,07E-06                 | Dym,Yif1b,Copg,Plb1,Snrpn,Mpv17,Sh3bgr,D16H22S680E,Emilin2,Creb3,Iqsec2,Vps8,Dhrs1,Lama2,Calml4,Atp2a3,Tpcn1,Dlg2,Gdf15,Man2b1,Nrip3,Lrch1,Rdh12,Tollip,Sh2d4a,Pxmp4,Grk4,1300010F03Rik,Pdia5,Pcbd2,Hck,ORF63,Cox6a2,Kif3a,Lrsam1,Immp1                                                                        |
| <b>mmu-miR-466d-5p</b> | 44(776)                | 6,54E-06                 | 1300014I06Rik,Dym,Adra1b,Copg,Usp2,Plb1,Ecm1,Snrpn,Fbxo9,Alg14,Nt5m,Elmo2,Emilin2,Sync,Tbcd,1110007C09Rik,Armc8,Skap2,Bmp4,Calml4,Lgals9,Suox,Zbtb4,Man2b1,2700078K21Rik,Nrip3,Mmaa,Tmem175,C330006K01Rik,Adamts15,Ly6c1,Tollip,Plcb1,0610037L13Rik,Tsc22d3,Il17d,Ssbp2,Hck,Ufm1,Mras,Kif3a,Top1,Tbc1d9b,Mtus1 |
| <b>mmu-miR-138</b>     | 37(776)                | 6,95E-06                 | Pank2,Zfp78,Kremen1,Gyg,Magi3,Gpx4,Fbxo9,Fem1a,Ehd1,Clstn1,Prss36,Crybb3,F630110N24Rik,Dgkg,9430038I01Rik,Cacna1g,Arl2,Man2b1,Fabp3,Slc6a8,Ing4,Tollip,Pxmp4,Mtm1,Synpo2,Tex264,Vps24,Tuba8,Csrp2,Cox6a2,Ckm,Igfbp2,Gas6,Wscd2,1700021C14Rik,Pcsk6,2810428I15Rik                                               |

| <i>miRNA name</i>      | <i>Number of genes</i> | <i>Corrected p-value</i> | <i>miRNA targets among genes induced in Rasless cells (from Table S1)</i>                                                                                                                                                                                                                                                    |
|------------------------|------------------------|--------------------------|------------------------------------------------------------------------------------------------------------------------------------------------------------------------------------------------------------------------------------------------------------------------------------------------------------------------------|
| <b>mmu-miR-7b</b>      | 35(776)                | 7,22E-06                 | Gtf2h5,Wdr47,Bri3,Cat,Rpl17,Pef1,Ascc2,Klhl18,Smpdl3a,Insig2,Lrrc51,Sh3bgr,Creb3,Tgfb2,Ank2,Pld1,Herpud2,Tcn2,Grina,Shank3,Nudt7,Slc6a8,Hbxip,Vdac1,Bbs5,Pltp,4930523C07Rik,Pxmp4,Atp6v0b,Slc25a39,Nr2c1,Sparg,Tmub2,Uchl1,Atp10d                                                                                            |
| <b>mmu-miR-449b</b>    | 36(776)                | 7,46E-06                 | Ahnak2,Col14a1,Tcta,Arvcf,Fbxo9,Hexa,Rras,D16H22S680E,Stk39,Sync,Nfs1,Vps39,Vps8,Slc31a2,Ttc15,Ccdc64,Suox,Arl2,Zbtb4,Tom1,Bphl,Serpib9c,Nrip3,Lims2,Tmem175,Rell2,Mtcb1,Plcb1,Ankrd29,Pde4dip,Def8,Acyp2,Tex264,Cog6,Sh3tc2,Wscd2                                                                                           |
| <b>mmu-miR-148b</b>    | 38(776)                | 7,58E-06                 | Mcee,Plb1,Gabarapl2,Sh3bgr,Klf15,Ank2,Sgcb,5830405N20Rik,Myom2,Txnrd3,Grina,Ypel3,Pbxip1,Ascc1,Nudt7,Idua,Nrip3,Akap4,Gpc4,Ankrd29,Pde4dip,Acyp2,Il17d,Slc2a6,Cdh7,Mras,Sh3tc2,Ckm,Cdkn2b,Slamf9,Rhoj,1810030N24Rik,Tmem50b,Zfp704,Dmpk,Tmem9b,1700094D03Rik,3110002H16Rik                                                   |
| <b>mmu-miR-466h</b>    | 44(776)                | 9,86E-06                 | Yif1b,Cogg,Usp2,Mcee,Plb1,Ecm1,Rpl17,Snrpn,Zdhhc4,Fbxo9,Alg14,Elmo2,Atp6v0e,Lamb2,D6Wsu163e,Crybb3,Akap13,Armc8,Anxa3,Slc46a3,Calml4,Tpcn1,Man2b1,2700078K21Rik,Nrip3,Hectd3,Tmem175,C330006K01Rik,Slc22a4,Itpr2,Ntn4,Vnn1,Sned1,Slc26a11,Pcbd2,Ssbp2,Serf2,Gpr39,Cox6a2,Tom112,Tpp1,Igfbp1,Tbc1d9b,Cyb5r3                   |
| <b>mmu-miR-106b</b>    | 36(776)                | 1,09E-05                 | Adc,Crot,Smad6,Loxl1,Akap13,Myom2,2010003O02Rik,Rora,Stard6,Pbxip1,Nudt7,Idua,St3gal5,Dusp8,Serpib9b,Bbs5,Ntn4,App,Ahnak,Clip4,Fzd8,Chmp4c,Ufc1,Arhgap1,Cog6,Csrp2,Clcn7,Cbara1,1810046J19Rik,Acaa1a,1500011K16Rik,Uchl1,Zfp704,Atp10d,Nagk,Ankrd44                                                                          |
| <b>mmu-miR-714</b>     | 36(776)                | 1,09E-05                 | Stmn3,Plb1,Prss29,Nt5m,Ehd1,Emilin2,Ppapdc3,Lamb2,Iqsec2,Slc35a2,Dhrs1,Sepw1,Tpcn1,Gstm2,Ypel3,Zbtb4,Myeov2,C1qtnf6,Snta1,Slc35c2,Adamts15,Ly6c1,Bbs5,Ing4,Dbp,Necap2,Adamts2,Tex264,Slc25a39,Hrtuba8,Adamts4,Atp5e,Rabac1,1700094D03Rik,Aph1a                                                                               |
| <b>mmu-miR-695</b>     | 34(776)                | 1,10E-05                 | Zfp78,S100a1,Rab4b,Sema3b,Slc22a18,Caml,Vps8,Lyplal1,Pigz,9430038I01Rik,Ap3m2,Dph1,Guk1,Itgb1bp1,Shank3,Impdh1,Slc35b1,Garnl3,9130011J15Rik,Rdh12,Plcb1,Pltp,Srr,Frmpd1,1300010F03Rik,Mrpl55,Il17d,1810027O10Rik,Adamts4,Mtss1,Rhoj,Atp6v0a1,Shroom3,Ankrd44                                                                 |
| <b>mmu-miR-700</b>     | 33(776)                | 1,23E-05                 | Ap3s1,Yif1b,Usp2,Cyp27a1,Hexa,Atp6v0e,Cd81,Loxl1,Nfs1,Dusp3,Copz2,Renbp,Adcy9,Qk,Sepw1,Trappc21,Grina,Myeov2,Ergic3,Iscu,Zdhhc8,Psен2,2310046K01Rik,Dbp,Gpc4,Npdc1,Rab71l1,Kif13b,Nhlrc1,2610019F03Rik,Agl,Uchl1,Dmpk                                                                                                        |
| <b>mmu-miR-202-3p</b>  | 34(776)                | 1,27E-05                 | Dtx2,Adra1b,Slc37a4,S100a1,Tmem41a,Smpdl3a,Sh3bgr,Rras,Caml,Tgfb2,Dusp3,Tbcd,Vps8,Gramd3,Tmem87b,Gstm2,Hsd3b3,Tom1,P4ha2,Lims2,Atg7,Pde6d,Ctsb,Sstr4,Slc2a6,Hck,Tuba8,Htatip2,Cpa6,Arhgap1,1810046J19Rik,Tpp1,Slamf9,Uchl1                                                                                                   |
| <b>mmu-miR-331-3p</b>  | 33(776)                | 1,37E-05                 | Pank2,Gtf2h5,Usp2,Sgca,Mal,Sema3b,Hexa,Ppp2r5b,F630110N24Rik,Adcy9,Mrgpre,Synpo,Ypel3,Shank3,Nfe2l1,Cspg4,Impdh1,L1cam,Rell2,S100a16,Pde6d,Hgsnat,Sirt2,Synpo2,Mxra7,Ikbkg,Gpr39,Sh3tc2,Cbara1,Camkk1,Uchl1,Zfp704,Yif1a                                                                                                     |
| <b>mmu-miR-466f-5p</b> | 44(776)                | 1,44E-05                 | Pank2,Zfand3,Adra1b,Cogg,Usp2,Mcee,Mpv17,Fbxo9,Alg14,Insig2,Lrrc51,Elmo2,D16H22S680E,R74862,Lamb2,D6Wsu163e,Creb3,Amhr2,Akap13,Armc8,Slc46a3,5830405N20Rik,Lgals9,Ccdc64,2700078K21Rik,St3gal5,Nrip3,Deb1,Ly6c1,Ing4,Plcb1,Tsc22d3,Ssbp2,Hr,Serf2,Acyp1,2900026A02Rik,Dnajc4,Daglb,Tom112,Igfbp2,Lrsam1,Limch1,1700094D03Rik |
| <b>mmu-miR-20b</b>     | 37(776)                | 1,46E-05                 | Map3k8,Camk4,Adc,Smad6,Caml,Neu1,Creb3,Tbcd,Pbxip1,Nudt7,St3gal5,Dusp8,2700078E11Rik,Serpib9c,Serpib9b,Htra3,Adamts15,Ing4,Ntn4,Dbp,Srp14,1300010F03Rik,App,Ahnak,Clip4,Synpo2,Chmp4c,Ufc1,Arhgap1,Cbara1,Acaa1a,Mdfic,Uchl1,Zfp704,Atp10d,Nagk,Ankrd44                                                                      |
| <b>mmu-let-7i</b>      | 39(776)                | 1,50E-05                 | Dtx2,Col14a1,Mcee,Slc37a4,Coq10a,Tlr6,Nt5m,Sh3bgr,Rras,Elmo2,R74862,Cyp4v3,Trappc6a,Gng5,Lyrm1,Lama2,Skap2,Ankra2,Itgb1bp1,Chrd,Lnx1,Slc35b1,Ascc1,Tll7,Fabp3,Rell2,Abtb2,Mtm1,Gpc4,Srp14,Isca2,BC029214,App,Def8,1110034G24Rik,6330406I15Rik,Acaa1a,C1qtnf1,Vps29                                                           |
| <b>mmu-miR-532-5p</b>  | 33(776)                | 1,61E-05                 | Thra,Ap3s1,Adra1b,Rab43,Plb1,Arvcf,Sh3bgr,Elmo2,AI593442,Cyp4v3,Trappc6a,Rhbdd1,Cry2,1700009P17Rik,Trappc21,2700078K21Rik,Slc35c2,Ly6c1,Ing4,Pde6d,Ctsb,Atp6v0b,Atg12,Sirt2,Spata21,Bcmo1,Atp5s,Ikbkg,Vps24,Slc41a2,1810030N24Rik,Yif1a,Atp10d                                                                               |
| <b>mmu-miR-341</b>     | 33(776)                | 1,82E-05                 | Acyp2,Yif1b,Usp2,Mcee,Kremen1,Magi3,Dhrs3,Selm,Elmo2,Wnt9a,Clstn1,Lamb2,Vps39,Tgfb2,Dab2ip,Vps8,Anxa3,Hexb,Riok3,P4ha2,Snta1,Ascc1,Garnl3,Mtcb1,Abtb2,Rab71l1,Asb1,Ptprm,Slc25a35,Rit1,C1qtnf5,Ltp3,Aldh3a2                                                                                                                  |
| <b>mmu-miR-328</b>     | 32(776)                | 1,82E-05                 | Dym,Sgca,Rab43,Cobl,Ehd1,Cd81,Atp6v1e1,Trappc6a,Kif1c,F630110N24Rik,Clip1,Ephb3,Tcn2,Shank3,Nfe2l1,Cspg4,Rapsn,Nupr1,Vnn1,BC089491,Mtcb1,Dbp,Zfand2b,Spata21,Il17d,Sema3f,Gpr39,Tom112,9930013L23Rik,Cdkn2b,Gas6,Lmna                                                                                                        |
| <b>mmu-miR-130a</b>    | 37(776)                | 1,84E-05                 | Dym,Dtx2,Map3k8,Ubl4,Sh3bgr,Habp4,Cd81,Stk39,Gadd45b,Atp9b,D6Wsu163e,Mrgprf,Sgcb,Ankra2,Myom2,Nipa1,Ensa,Slc9a6,Bbs5,Reep3,Akap4,Plcb1,Mtm1,Ankrd29,Srp14,Adamts2,Tanc2,Acyp2,Ptprm,Hadhb,Tpp1,9930013L23Rik,Tbc1d9b,Vps29,Tmem9b,Ankrd44,3110002H16Rik                                                                      |

| <i>miRNA name</i>     | <i>Number of genes</i> | <i>Corrected p-value</i> | <i>miRNA targets among genes induced in Rasless cells (from Table S1)</i>                                                                                                                                                                                                    |
|-----------------------|------------------------|--------------------------|------------------------------------------------------------------------------------------------------------------------------------------------------------------------------------------------------------------------------------------------------------------------------|
| <b>mmu-miR-691</b>    | 33(776)                | 1,89E-05                 | Oit3,Copg,Alg14,Hist2h2bb,Trpv4,Amhr2,Akap13,Vps8,Gramd3,1700009P17Rik,Anxa3,5830405N20Rik,Repin1,2010003O02Rik,Rora,Mocs2,Htra3,Deb1,Glt8d1,Psen2,Nkiras2,Vnn1,Sned1,Trip1,Pltp,Gabarap,Kif13b,Nr2c1,Ufc1,Hadhb,Slc2a8,Tubb2a,Ankrd44                                       |
| <b>mmu-miR-467e</b>   | 36(776)                | 1,98E-05                 | Fech,Cat,Kif27,Commd8,Birc7,Zdhhc4,Gyg,Sh3bgr,Rras,Atp6v0e,Cd81,Dscr3,Sync,Creb3,Calm14,Ttc15,Repin1,Tpcn1,Grina,Farp2,Dlg2,Lnx1,Slc35b1,Nudt7,Serpib9b,Grik2,Cdk5,Akap4,Dbp,Atg12,Ikbkg,4930579G22Rik,Stx7,Ankrd12,Uchl1,Lrpap1                                             |
| <b>mmu-miR-30c-2*</b> | 34(776)                | 1,99E-05                 | Copg,Kif27,Ascc2,S100a1,Fahd2a,Smpd13a,Clstn1,Prss36,Ppapdc3,Copz2,Rarres2,Clip1,Dhrs1,Tmco3,Arnt,Arl2,Man2b1,Ppt2,Ccdc80,Ly6c1,Pde6d,Plcb1,Ctsb,Dbp,Nr2c1,Mras,181004619Rik,Tom1l2,Slamf9,Atp6v0a1,1810030N24Rik,Lmna,Cacna1b,1700094D03Rik                                 |
| <b>mmu-miR-346</b>    | 31(776)                | 2,04E-05                 | Dym,Tssc4,Adra1b,Sgca,Slc37a4,Adc,Fahd2a,Selm,Insig2,Sema3b,Hexa,Ank2,Slc35a2,F630110N24Rik,Dusp3,Trpt1,1700009P17Rik,Ephb3,Ndel1,Idua,Anxa1,Galnt2,S100a13,Nupr1,Trak1,Ctsb,Zfand2b,Cox6a2,Atp5e,Tmem38a,Aph1a                                                              |
| <b>mmu-miR-149</b>    | 33(776)                | 2,07E-05                 | Mrc2,Thra,Tssc4,Sgca,Mtap1a,Cd81,Gadd45b,Nudt13,Dab2ip,Akap13,Renbp,Vps8,Dok4,Ras12,P4ha2,Adar,Slc35c2,Vdac1,S100a13,Itpr2,Nupr1,Pde4dip,Klf2,Il17d,Kif13b,Tex264,Slc25a39,Hck,1810027O10Rik,Gpr39,BC004004,Tom1l2,Lrsam1                                                    |
| <b>mmu-miR-153</b>    | 34(776)                | 2,11E-05                 | Ppp1r16a,Sgca,Plb1,Crot,Smpd13a,Rbms2,Sh3bgr,D6Wsu163e,Dusp3,Dab2ip,Armc8,Gramd3,Slc46a3,Qk,Ankra2,Dlg2,Bphl,Idua,Lrrc57,Lrch1,Tmem175,Fabp3,Mtcb1,Grk4,Srp14,Atp6v0b,App,Uqcrcq,Slc2a6,Chmp4c,Igfbp1,Fzd6,Satb1,Ankrd44                                                     |
| <b>mmu-miR-486</b>    | 36(776)                | 2,15E-05                 | Birc7,Tmem41a,Higd1a,Elmo2,Abcb6,Sync,Vps39,Slc35a2,Amhr2,Fstl1,Armc8,Tmem87b,Ankra2,Tob1,Ndel1,Itga9,Tom1,C330006K01Rik,Atg4a,Rdh12,5530400B01Rik,Tollip,Abtb2,Gpc4,Slc26a11,1300010F03Rik,Atp6v0b,Tbccd1,Cdh7,Cog6,Cbara1,Igfbp2,Slamf9,1500011K16Rik,Chst12,1700094D03Rik |
| <b>mmu-miR-28</b>     | 32(776)                | 2,28E-05                 | Sgca,Stmn3,Kif27,Mal,Tmem41a,Rbms2,Elmo2,Lamb2,Iqsec2,Dynlrb1,Lmbr1,Clip1,Arnt,Mxra8,Sepw1,Qpct,Ndel1,Itgb1bp1,Ppt2,Nudt7,Cdk5,S100a16,Ahnak,Clip4,Rab71l,Gstp1,1110034G24Rik,Mras,Fbxw4,Slc2a8,Pcsk6,Aldh3a2                                                                |
| <b>mmu-miR-25</b>     | 37(776)                | 2,29E-05                 | Ugp2,Sgca,Lgr4,Adamts5,Smad6,Serpib6c,Slc35a2,Dgkg,Gramd3,Anxa3,Slc31a2,Ap3m2,Tob1,Herpud2,Riok3,Asah1,Mfap5,Ccdc80,Tmem154,Ing4,4930523C07Rik,Mtm1,2010111I01Rik,Sirt2,Klf2,Cxcr7,Hck,Dpm2,Fbn2,Cbara1,Dnajc4,Cdkn2b,Igfbp1,1700021C14Rik,Mdfic,Dusp22,Atp10d               |
| <b>mmu-miR-429</b>    | 35(776)                | 2,29E-05                 | Ugp2,Plb1,Atp6v0e,Krt80,Stam2,Fn1,Serpib6c,Slc35a2,Akap13,Lmbr1,Tpcn1,Nipa1,Nudt7,Dusp8,Nrip3,Ccdc80,Tmem154,Ly6c1,Plcb1,Pltp,Ahnak,Rab71l,6530401N04Rik,Slc25a39,Sema3f,Hck,Acyp1,Slamf9,1500011K16Rik,Reck,Tubb2a,Npc1,Mtus1,Ankrd44,Chpt1                                 |
| <b>mmu-miR-200a*</b>  | 29(776)                | 2,56E-05                 | Gtf2h5,Kif27,Magi3,Coq10a,Zhx1,Insig2,Fn1,Cyp4v3,Sgcb,Lyrm1,Tmco3,Repin1,Rab3gap2,Stard6,Man2b1,Ascc1,Nudt7,Tmem175,Exoc3,Tanc2,Spata21,Rab71l,Usps53,Htatip2,Arhgap1,Tom1l2,Wdr7,Chst12,Atp10d                                                                              |
| <b>mmu-miR-301b</b>   | 35(776)                | 2,67E-05                 | Dym,Ubl4,Sh3bgr,Habp4,Atp9b,Loxl1,D6Wsu163e,Adcy9,1810020D17Rik,Mrgprf,Sgcb,Ankra2,Ttc15,2010003O02Rik,Tob1,Dlg2,2310046K01Rik,Akap4,Hscb,Adamts2,181003717Rik,Pdia5,Sstr4,Acyp2,Ptprm,Chmp4c,Itfg3,Slamf9,1500011K16Rik,Cpeb1,Tbc1d9b,Vps29,Tmem9b,Ankrd44,3110002H16Rik    |
| <b>mmu-miR-540-3p</b> | 38(776)                | 2,70E-05                 | Ppp1r16a,Gtf2h5,Zfand3,Stmn3,Kif27,Ascc2,Adc,Dhrs3,Trpc7,Fn1,Crybb3,Copz2,Akap13,Pigz,Slc46a3,Camk1,Sepw1,Guk1,Tcn2,Ndufa10,Itgb1bp1,Impdh1,P4ha2,Megf6,Adamts15,Mlycd,Trak1,Naga,Pde6d,Slc26a11,1300010F03Rik,1700016M24Rik,Slco3a1,Slc25a39,Hck,Tuba8,Ufc1,Cdh7            |
| <b>mmu-miR-187</b>    | 32(776)                | 2,72E-05                 | Stmn3,Slc37a4,Commd8,Ehd1,Emilin2,Nudt13,Upk3b,Loxl1,Slc35a2,F630110N24Rik,Dusp3,Akap13,Slc7a7,Gramd3,Ttc15,Qpct,Shank3,Myeov2,Mfap5,Atg7,BC089491,Slc39a14,Klf2,Ptprm,Hck,Cog6,Cox6a2,Ckm,Kif3a,Tom1l2,Gas6,Dusp22                                                          |
| <b>mmu-miR-412</b>    | 30(776)                | 2,72E-05                 | Hadha,Tcta,Selm,Alg14,Klf15,Akap13,Tmem87b,Clip1,Dhrs1,Ephb3,Tpcn1,Arl2,Itgb1bp1,Wisp2,Rora,Shank3,Nfe2l1,Ppm1h,Chid1,Kif13b,Slc25a39,Sema3f,Sh3tc2,Gas6,Fbxw4,Cpeb1,Cyb5r3,Slc2a8,Tmem9b,Aldh3a2                                                                            |
| <b>mmu-miR-201</b>    | 32(776)                | 2,73E-05                 | Cyp27a1,Sh3bgr,Stam2,Dynlrb1,F630110N24Rik,Rarres2,Klk1b4,1700009P17Rik,Dhrs1,Myom2,Gstk1,Lnx1,Ascc1,Dusp8,Lrrc57,2700078E11Rik,Iscu,Ppm1h,Ulk2,Mlycd,Itpr2,Ctsl,Def8,Acyp2,Kif13b,Ptdss1,Fbxl20,Slc25a35,1810030N24Rik,1700021C14Rik,Hint3,Aldh3a2                          |
| <b>mmu-miR-711</b>    | 31(776)                | 2,74E-05                 | Rab4b,Tlr6,Rras,Napb,Clstn1,Loxl1,Cdc42ep2,Slc44a1,Gstm2,Grina,Zbtb4,Impdh1,Aldh6a1,Ppt2,Htra3,Adar,2310046K01Rik,Ing4,Slc26a11,Tm9sf4,Klf2,Tanc2,Rab71l,Synpo2,Cox6a2,Ckm,Stx7,Slc25a35,Rabac1,Atp10d,Chpt1                                                                 |
| <b>mmu-miR-22</b>     | 35(776)                | 2,77E-05                 | Thra,Tssc4,Commd8,Hspa12a,Camk4,Ascc2,Sema3b,Rab3d,Nudt13,Ppp2r5b,Dynlrb1,Ank2,Slc7a7,Vps8,Arhgef12,Nfe2l1,Cspg4,C1qtnf6,Nudt7,St3gal5,Lrrc57,Htra3,Ccdc80,Lrch1,S100a16,Abtb2,2010111I01Rik,Slc39a14,Zdhhc24,Ufc1,Htatip2,Gas6,Slc2a8,Tmem9b,Npc1                           |

| <i>miRNA name</i>      | <i>Number of genes</i> | <i>Corrected p-value</i> | <i>miRNA targets among genes induced in Rasless cells (from Table S1)</i>                                                                                                                                                                                                                        |
|------------------------|------------------------|--------------------------|--------------------------------------------------------------------------------------------------------------------------------------------------------------------------------------------------------------------------------------------------------------------------------------------------|
| <b>mmu-miR-296-5p</b>  | 35(776)                | 2,79E-05                 | Mrc2,Ahnak2,Thra,Stmn3,Pef1,Rab4b,Clstn1,AI593442,Ppapdc3,Trpv4,Upk3b,Klf15,Neu1,Iqsec2,Kif1c,F630110N24Rik,Trpt1,Dhrs1,Dusp8,Adar,Ing4,Atg7,S100a16,BC089491,Zfand2b,Sirt2,Ikbkg,Sema3f,Dpm2,Htatip2,Stxbp1,Cyb5r3,Ltbp3,Cacna1b,Aph1a                                                          |
| <b>mmu-miR-301a</b>    | 35(776)                | 2,79E-05                 | Dym,Ubl4,Sh3bgr,Elmo2,Atp9b,Loxl1,D6Wsu163e,Adcy9,1810020D17Rik,Btf3i4,Sgcb,Ankra2,Ttc15,201003002Rik,Suox,Tob1,Dlg2,Akap4,Adamts2,1810037117Rik,Pdia5,Sstr4,Acyp2,Ptprm,Chmp4c,Iltfg3,Slamf9,1500011K16Rik,Cpeb1,Tbc1d9b,Agl,Vps29,Tmem9b,Ankrd44,3110002H16Rik                                 |
| <b>mmu-miR-590-5p</b>  | 34(776)                | 2,81E-05                 | Fech,Ugp2,Kif27,Rras,Prss36,Adcy9,Gramd3,Lmbr1,2010003002Rik,Farp2,Arhgef12,Gdf15,Slc9a6,2700078K21Rik,Bphl,Ascc1,Nudt7,Lrrc57,Anxa1,Bbs5,Hscb,Dbp,Mtm1,Ssbp2,Dnalc1,1110034G24Rik,Acyp1,Cbar a1,Reck,1810030N24Rik,Rabac1,Satb1,Uchl1,Zfp704                                                    |
| <b>mmu-miR-542-3p</b>  | 34(776)                | 2,91E-05                 | Mrc2,Col14a1,Stmn3,Rab4b,Fbxo9,Rab38,Fem1a,Emilin2,Iqsec2,Tbcd,Slc7a7,Mxra8,Txnrd3,Tpcn1,Trim36,Arl2,Nudt7,Lrrc57,Tmem175,Adamts5,Grk4,Gabarap,Mrpl55,Pcbd2,Chchd6,Uqcrcq,Ufc1,Fbxl20,Htatip2,Tom1l2,Rabac1,Tubb2a,Uchl1,Yif1a                                                                   |
| <b>mmu-miR-141</b>     | 34(776)                | 2,93E-05                 | Ugp2,Snap91,Tssc4,Sgca,Gyg,Rab38,Fn1,Upk3b,Vps39,Akap13,Lyplal1,Tmco3,Calm14,Fbxl2,Pdggc,Riok3,P4ha2,Ppt2,Nudt7,St3gal5,Lrrc57,Ccdc80,Slc35c2,Pltp,Tanc2,Cyb5,6530401N04Rik,1810046J19Rik,Hadhb,9930013L23Rik,Tbc1d14,Wdr7,1700094D03Rik,Chpt1                                                   |
| <b>mmu-miR-467c</b>    | 37(776)                | 2,95E-05                 | Kif27,Mpv17,Trpc7,BC024814,Selm,Cyp27a1,Aldh7a1,Cd81,Stam2,Smad6,Cyp4v3,Caml,D6Wsu163e,Pld1,Armc8,Skap2,Calm14,Myom2,Tpcn1,Dlg2,Ypel3,Pbxip1,C1qtnf6,Nudt7,Dusp8,Serpinb9b,Pde6d,Mtm1,Gpc4,Pde4dip,Mmab,Gabarap,4930579G22Rik,Stx7,1500011K16Rik,Mdfic,Nagk                                      |
| <b>mmu-miR-485</b>     | 32(776)                | 2,96E-05                 | Zfand3,Dtx2,Copg,Trpc7,Smpdl3a,Cyp27a1,Gadd45b,Vps8,Tmem87b,9430038I01Rik,Sepw1,Txnrd3,Dok4,Tpcn1,Epb4.1l4b,C1qtnf6,P4ha2,Ppt2,St3gal5,Rel2,Itpr2,Naga,Sh2d4a,0610037L13Rik,Isca2,Atp6v0b,Text264,BCmo1,1110034G24Rik,Fbn2,Rabac1,Lmna                                                           |
| <b>mmu-miR-483*</b>    | 27(776)                | 2,96E-05                 | Adra1b,Slc37a4,Slc6a7,Cox4nb,Alg14,Atp6v0e,Trpv4,Ppp2r5b,Crybb3,Gabarapl1,1700009P17Rik,Tmem87b,Tpcn1,Chrd,Nfe2l1,Cspg4,Impdh1,Slc22a4,Nkiras2,Nenf,Zfand2b,Fzd8,Sema3f,Serf2,Cdh7,Acaa1a,Igfbp2                                                                                                 |
| <b>mmu-miR-431</b>     | 32(776)                | 3,05E-05                 | Ahnak2,Dym,Adra1b,Plb1,Ascc2,Dhrs3,Rab4b,Nt5m,Atp6v0e,Abcb6,Stam2,Gadd45b,Ppp2r5b,Vps8,Anxa3,Ppt2,St3gal5,Mocs2,Glt8d1,S100a13,Nupr1,BC089491,Ctsb,Grk4,BC029214,Sirt2,Pcbd2,Tbccd1,Gstp1,Sh3tc2,1500011K16Rik,Dmpk                                                                              |
| <b>mmu-miR-325</b>     | 39(776)                | 3,22E-05                 | Oit3,Crat,Stmn3,Slc6a7,Fbxo9,Insig2,Hexa,Emilin2,Rab40b,Kcnn1,Trpv4,Lamb2,Trappc6a,Crybb3,Ttc15,5830405N20Rik,Apoa1bp,2010003002Rik,Gstm2,Lnx1,Epb4.1l4b,P4ha2,Nudt7,Tmem154,Fabp3,Galnt10,Ps en2,Slc22a4,Bbs5,Gabarap,Glipr1,Ufc1,1110034G24Rik,Cdkn1a,Cox6a2,Scarb2,Hadhb,Immp11,3110002H16Rik |
| <b>mmu-miR-188-3p</b>  | 35(776)                | 3,24E-05                 | Ppp1r16a,Usp2,Kif27,Dhrs3,Rab4b,Fbxo9,Rras,Habp4,Wnt9a,Abcb6,Clstn1,Tmem64,Neu1,Atp6v1e1,Cd248,Mtmr3,Tgfb2,F630110N24Rik,Ankra2,Slc31a2,Sepw1,Ccdc64,Chrd,Cdk5,Glt8d1,Rel2,Slc35c2,Dbp,Npdc1,Atp6v0b,App,Slco3a1,Spata21,Csrp2,Atp5e                                                             |
| <b>mmu-miR-339-3p</b>  | 35(776)                | 3,38E-05                 | Pank2,Yif1b,Sgca,Stmn3,Adc,Tmem41a,Smpdl3a,Nt5m,Hexa,Kcnn1,Clstn1,Trpv4,Adcy9,Gramd3,Sepw1,Cacna1g,Myo6,2900010M23Rik,A430110N23Rik,Rora,Ascc1,Fabp3,Slc35c2,Ly6c1,Nol3,Mustn1,Atp6v0b,Gabarap,Asb1,Csrp2,Ckm,Afap1l2,Esrrb,Tubb2a,Ltbp3                                                         |
| <b>mmu-miR-101a</b>    | 37(776)                | 3,39E-05                 | Ppp1r16a,Oit3,Zfand3,Ap3s1,Dtx2,Map3k8,Sgca,Mcee,Trpc7,Rab38,Abcb6,Stam2,Ppapdc3,Caml,Rab3gag2,Ccdc64,Nipa1,Ndufa10,Mtap6,Ascc1,Mfap5,Mlycd,Ing4,Dopey2,Pxmp4,Srp14,Nr2c1,Serf2,1110034G24Rik,Htatip2,Clcn7,Acaa1a,Cdkn2b,Tbc1d14,Fzd6,Tubb2a,Ltbp3                                              |
| <b>mmu-miR-302a</b>    | 35(776)                | 3,43E-05                 | Maob,Mpv17,Magi3,Rab38,Emilin2,Loxl1,Rragc,2010003002Rik,Dlg2,Nudt7,2700078E11Rik,Glt8d1,9130011J15Rik,S100a13,Os9,Akap4,Trip1,Impact,Lrp4,1810037117Rik,Clip4,Rab7l1,Synpo2,Nr2c1,Ikbkg,Chmp4c,BC004004,Csrp2,Sh3tc2,Cdkn1a,Nhlrc1,Wdr7,Uchl1,1700094D03Rik,Ankrd44                             |
| <b>mmu-miR-883b-3p</b> | 36(776)                | 3,58E-05                 | Ugp2,Snap91,Hadha,Adc,Mpv17,Tmem41a,Rab3d,Nt5m,Rab40b,Fn1,Clstn1,AI593442,Renbp,Fstl1,Anxa3,Ttc15,Wisp2,Stard6,Mocs2,Iscu,Naga,Ctsb,Srp14,Adamts2,Atp6v0b,Sstr4,1110034G24Rik,Clcn7,1810046J19Rik,Kif3a,Acaa1a,Scarb2,Hadhb,Igfbp1,Fbxw4,Oplah                                                   |
| <b>mmu-miR-150</b>     | 32(776)                | 4,21E-05                 | Ahnak2,Dym,Iah1,Adra1b,Copg,Tcta,Dhrs3,Sync,Neu1,Iqsec2,Dynlrb1,Tbcd,Lyrm1,Gabarapl1,Ptplad2,Cacna1g,App12,Rora,Cspg4,Adamts5,Bbs5,Ing4,BC089491,Tollip,Dbp,Gpc4,Npdc1,Spata21,Glipr1,Wscd2,C1qtnf1,1700094D03Rik                                                                                |
| <b>mmu-miR-763</b>     | 33(776)                | 4,23E-05                 | Ascc2,Prss29,Smpdl3a,Rras,Cyp4v3,Hdlbp,Ppp2r5b,Cd248,Tbcd,Gramd3,Lmbr1,Sepw1,Arl2,Impdh1,St3gal5,Nkiras2,Akap4,S100a16,Nol3,Pde6d,Pltp,Dbp,Srp14,Tbccd1,Ptdss1,Vps24,1110034G24Rik,4930579G22Rik,Cdkn1a,Dnajc4,Rabac1,Oplah,281042815Rik                                                         |
| <b>mmu-miR-339-5p</b>  | 33(776)                | 4,56E-05                 | Ppp1r16a,Gyg,Prss29,Hexa,Clstn1,F630110N24Rik,2900010M23Rik,Trappc2,Galns,Ndel1,Grina,Rora,Slc9a6,Nfe2l1,2700078K21Rik,9130011J15Rik,Naga,Mustn1,Pcyt1a,Abtb2,Necap2,Lrba,Zfand2b,Sirt2,Tmbim1,Slc2a6,BC004004,Mras,Adamts4,Scarb2,Igfbp2,Atp5e,Scn1b                                            |

| <i>miRNA name</i>      | <i>Number of genes</i> | <i>Corrected p-value</i> | <i>miRNA targets among genes induced in Rasless cells (from Table S1)</i>                                                                                                                                                                                              |
|------------------------|------------------------|--------------------------|------------------------------------------------------------------------------------------------------------------------------------------------------------------------------------------------------------------------------------------------------------------------|
| <b>mmu-miR-9</b>       | 33(776)                | 4,56E-05                 | Ahnak2,Pmp22,Ascc2,Prss29,Cyp4v3,Cd248,Tbcd,1110007C09Rik,Pld1,Tmem87b,Pigz,Anxa3,Slc31a2,Guk1,Chrd,Hsd3b3,P4ha2,Pltp,Hgsnat,0610037L13Rik,1300010F03Rik,A930005H10Rik,Sorbs3,Ugt2b36,Ptdss1,Cdh7,Itfg3,1810046J19Rik,Slc25a35,Wscd2,Igfbp1,Lmna,Mtus1                 |
| <b>mmu-miR-615-5p</b>  | 35(776)                | 4,63E-05                 | Pank2,Thra,Adra1b,Sgca,Stmn3,Ecm1,Rab4b,Cd81,Clstn1,Trpv4,Creb3,Cd248,Trappc6a,Ank2,Chrd,Ypel3,Shank3,Cspg4,Pbxip1,Ppt2,Dusp8,Cables1,Rell2,Mlycd,Ntn4,Ctsb,Npdc1,Adamts2,BC029214,Fzd8,Kif13b,Slc2a6,2900026A02Rik,Cox6b1,Shroom3                                     |
| <b>mmu-miR-467d</b>    | 37(776)                | 4,69E-05                 | Trpc7,BC024814,Selm,Aldh7a1,Cd81,Stam2,Smad6,Cyp4v3,Caml,D6Wsu163e,Akap13,Calm14,Ndel1,Tcn2,Gdf15,Pbxip1,2700078K21Rik,C1qtnf6,Dusp8,Serpib9b,Cables1,Pde6d,Mtm1,Gpc4,Srp14,1300010F03Rik,Pde4dip,Atp6v0b,Mmab,Gabarap,Rab711,ORF63,Stx7,1500011K16Rik,Rit1,Mdfic,Nagk |
| <b>mmu-miR-206</b>     | 30(776)                | 5,45E-05                 | Bri3,Snrpn,Smpdl3a,Sh3bgr,Mtap1a,Fn1,D6Wsu163e,Adcy9,Sgcb,Dgkg,Lmbr1,Hexb,2010003O02Rik,Zbtb4,Tppp,P4ha2,Lrch1,Atg7,Dopey2,Pde6d,Plcb1,Ankrd29,App,Def8,Mrpl55,Ptprm,Vps24,Dhps,Kif3a,Cpeb1                                                                            |
| <b>mmu-miR-883a-5p</b> | 35(776)                | 5,51E-05                 | 1300014I06Rik,2310028O11Rik,Stmn3,Adc,Fahd2a,Gabarap2,Rab38,Sh3bgr,Ank2,Anxa3,Skap2,Qk,Mxra8,Al317395,Ccdc64,Wisp2,Impdh1,Iscu,Anxa1,Glt8d1,Ctsb,Dbp,Srr,Srp14,1300010F03Rik,Mmab,Gabarap,6530401N04Rik,Cox6a2,Kif3a,Acaa1a,Oplah,Atp10d,Aldh3a2,Shroom3               |
| <b>mmu-miR-10b*</b>    | 29(776)                | 5,89E-05                 | 2310028O11Rik,Sqrdl,Stmn3,Emilin2,Adamts5,Caml,Adcy9,Fstl1,Lmbr1,Tmem87b,Clip1,Arnt,Hexb,Cacna1g,Wwp2,Snta1,Serpib9c,Pon3,Adamts5,4930523C07Rik,1810037I17Rik,Ahnak,Acyp1,Cbara1,Daglb,Slc25a35,Igfbp1,1700094D03Rik,Immp11                                            |
| <b>mmu-miR-9*</b>      | 28(776)                | 5,89E-05                 | Pank2,Iah1,Bri3,Caml,F630110N24Rik,Tbcd,Vps8,2010003O02Rik,Appl2,Herpud2,Dlg2,Hsd3b3,Slc9a6,P4ha2,Glt8d1,Psen2,Plcb1,Srp14,Ctst,Ugt2b36,Cxcr7,Slc25a35,Igfbp1,Uchl1,Cacna1b,1700094D03Rik,Immp11,Npc1                                                                  |
| <b>mmu-miR-148a</b>    | 36(776)                | 5,91E-05                 | Dym,Plb1,Gabarap2,Sh3bgr,Klf15,Sgcb,Myom2,Txnrd3,Grina,Ypel3,Cgnl1,Pbxip1,Ascc1,Nudt7,Mocs2,Nrip3,Akap4,Gpc4,Ankrd29,Pde4dip,Acyp2,Il17d,Cdh7,Mras,Sh3tc2,Ckm,Tom112,Stx7,Slamf9,Rhoj,1810030N24Rik,Tmem50b,Zfp704,Tmem9b,1700094D03Rik,3110002H16Rik                  |
| <b>mmu-miR-218-2*</b>  | 29(776)                | 6,00E-05                 | Pank2,Thra,Dhrs3,Alg14,Trappc6a,Adcy9,Myom2,Atp2a3,Tcn2,Ndufa10,Chrd,Zbtb4,Ascc1,Adar,9130011J15Rik,S100a13,Npdc1,2010111I01Rik,1300010F03Rik,App,Spata21,Chchd6,Acyp2,Kif13b,Asb1,Synpo2,Cxcr7,Rhoj,Hint3                                                             |
| <b>mmu-miR-705</b>     | 34(776)                | 6,03E-05                 | Ppp1r16a,Pank2,Thra,Yif1b,Sgca,S100a1,Fahd2a,Cyp27a1,D16H225680E,Trpv4,Slc35a2,Slc7a7,Abcd1,Vps8,Pigz,Camk1,Sepw1,Gstm2,Arl2,Ndufa10,Itgb1bp1,Zbtb4,Lims2,Nupr1,Mustn1,Ctsb,Gabarap,Slc25a39,BC046404,Scn1b,Rabac1,Lmna,Pcsk6,Ltbp3                                    |
| <b>mmu-miR-464</b>     | 32(776)                | 6,22E-05                 | Maob,Magi3,Crot,Gpx4,Lrrc51,Cobl,Emilin2,Abcb6,Adamts5,Caml,Atp6v1e1,Tbcd,Clip1,Cacna1g,Apoa1bp,Gdf15,Lrrc57,Tmem175,Naga,Hscb,Mtcp1,1300010F03Rik,Atp6v0b,Tm9sf4,Mmab,Chchd6,Cpa6,Tyrp1,Scarb2,Yif1a,Tmem9b,1700094D03Rik                                             |
| <b>mmu-miR-125b-5p</b> | 37(776)                | 6,69E-05                 | Ppp1r16a,Pank2,Col14a1,Plb1,Kif27,Kremen1,Ppapdc3,Neu1,Tgfb2,Akap13,Dgkg,Slc46a3,Gpr133,Grina,Rapsn,Capn5,Psen2,Mlycd,Trip1,Ankrd29,Pde4dip,Atp6v0b,Tbccd1,Slc2a6,Ikbkg,Sema3f,Hck,Ssfa2,Chmp4c,Itfg3,Acyp1,Sh3tc2,1810046J19Rik,Slc25a35,Fbxw4,Tmem38a,1700021C14Rik  |
| <b>mmu-miR-140</b>     | 33(776)                | 6,73E-05                 | Ifi35,Rnf13,Pmp22,Crot,Trpc7,Rab38,Wnt9a,Akap13,Adcy9,Gng5,Anxa3,Arnt,Stx8,Rab3gap2,Tpcn1,201003O02Rik,Herpud2,Chrd,Ypel3,Ascc1,Glt8d1,Ly6c1,Dopey2,Tollip,Mustn1,Sirt2,Ssbp2,Hr,1110034G24Rik,4930579G22Rik,Mras,Slc25a35,Cdkn2b                                      |
| <b>mmu-miR-322</b>     | 32(776)                | 6,86E-05                 | Bri3,Tcta,Tmem41a,Rab4b,Lyrm1,Klk1b4,Skap2,Cdc42ep2,Synpo,Arl2,Ypel3,C1qtnf6,Rapsn,Nudt7,Lrrc57,Glt8d1,Rdh12,Mlycd,Ly6c1,S100a16,Dopey2,BC089491,Trip1,0610037L13Rik,Srp14,Frmpd1,Zfand2b,Slc25a39,Ptprm,1110034G24Rik,Atp5e,Rabac1                                    |
| <b>mmu-miR-712</b>     | 29(776)                | 7,21E-05                 | Snap91,Sgca,Stmn3,Ascc2,Krt80,Abcb6,Prss36,Kif1c,F630110N24Rik,Armc8,Ttc15,Guk1,Arl2,Ypel3,Nfe2l1,Mtap6,Snta1,Lrrc57,Mfap5,Pik3ip1,Glt8d1,Rell2,Zfp560,Naga,Nol3,Sh2d4a,Ptprm,Cog6,Igfbp2                                                                              |
| <b>mmu-miR-30b</b>     | 35(776)                | 7,30E-05                 | Ppp1r16a,Pank2,Fech,Snrpn,Tmem41a,Magi3,Arvcf,Rab3d,Rab40b,Vps39,Ank2,Vps8,Gramd3,Ankra2,5830405N20Rik,Hoxa1,Aldh6a1,P4ha2,Ccdc80,Anxa1,Tmem175,Psen2,Vdac1,Bbs5,Frmpd1,Atg12,Ahnak,Pcbd2,Fbxl20,Slc41a2,Afap112,Fbxw4,Wdr7,Chst12,Atp10d                              |
| <b>mmu-miR-668</b>     | 31(776)                | 7,33E-05                 | Commd8,Mal,Gpx4,Smpdl3a,Rab3d,Cd81,Ppp2r5b,Lyplal1,1700009P17Rik,Gdf15,Cspg4,2700078K21Rik,P4ha2,Ascc1,Idua,Iscu,Cdk5,Ehd2,1110003E01Rik,Nkiras2,Zfand2b,Slc41a3,Htatip2,Scarb2,Igfbp2,Slamf9,Rhoj,Slc2a8,Limch1,1700094D03Rik,Kctd21                                  |
| <b>mmu-miR-302a*</b>   | 29(776)                | 7,53E-05                 | Prss29,Crot,Lrrc51,Fem1a,Atp6v0e,AI593442,Ank2,Dusp3,Pld1,Vps8,Armc8,Pigz,Ap3m2,Myo6,Suox,Tcn2,Myeov2,Nudt7,9130011J15Rik,Hbxip,4930523C07Rik,Gpc4,Ankrd29,1810037I17Rik,BC046404,1810027O10Rik,Dhps,Lrpap1,Shroom3                                                    |
| <b>mmu-miR-199b*</b>   | 28(776)                | 7,75E-05                 | Ppp1r16a,Gtf2h5,Sgca,Fahd2a,Fbxo9,Hexa,Sh3bgr,Sync,Pld1,Gng5,Pigz,Ndel1,Pik3ip1,Tmem175,Akap4,2010111I01Rik,Tbccd1,Slc2a6,BC004004,Sparc,Csrp2,Daglb,Tom112,Igfbp2,Gas6,Fbxw4,Atp6v0a1,Cyb5r3                                                                          |

| <i>miRNA name</i>      | <i>Number of genes</i> | <i>Corrected p-value</i> | <i>miRNA targets among genes induced in Rasless cells (from Table S1)</i>                                                                                                                                                                                                |
|------------------------|------------------------|--------------------------|--------------------------------------------------------------------------------------------------------------------------------------------------------------------------------------------------------------------------------------------------------------------------|
| <b>mmu-miR-137</b>     | 33(776)                | 7,79E-05                 | Dym,Ap3s1,lah1,Map3k8,Lgr4,Glrb,Inpp5a,AI593442,Btf3l4,Gramd3,Slc46a3,Appl2,Herpud2,Itgb1bp1,Star6,Dusp8,Ergic3,Rel2,Os9,Gpc4,Ankrd29,0610037L13Rik,Lrba,1300010F03Rik,Ahnak,Kif13b,Sema3f,Acyp1,Cox6a2,1810046J19Rik,Scn1b,Dusp22,Chpt1                                 |
| <b>mmu-miR-499</b>     | 30(776)                | 8,24E-05                 | Pank2,Adc,Papss2,Alg14,Gabarapl2,Btf3l4,Skap2,Ankra2,Herpud2,Ndel1,Mtap6,Nudt7,Nrip3,Iscu,Garnl3,Ulk2,Slc22a4,Ntn4,Hscb,Pde6d,Trip1,Plcb1,Pltp,Hgsnat,Srp14,Sparc,Atp5e,Igbbp1,Hhip,Rab22a                                                                               |
| <b>mmu-miR-342-3p</b>  | 32(776)                | 8,64E-05                 | Dtx2,Adra1b,Plb1,Gpx4,Smpdl3a,Tlr6,Insig2,Abcb6,Stam2,Clstn1,Creb3,Kif1c,Lyplal1,Tmco3,Myom2,Zbtb4,Wwp2,Nudt7,Ttl7,Ly6c1,Zmat2,Ctbs,Dbp,Sirt2,Tanc2,Rab7l1,Fbn2,Acyp1,Ankrd12,Tubb2a,1700094D03Rik,Mtus1                                                                 |
| <b>mmu-miR-125a-3p</b> | 36(776)                | 8,67E-05                 | Mpv17,Rab4b,Atp6v0e,Inpp5a,Trpv4,F630110N24Rik,Akap13,Trpt1,Fstl1,Rarres2,Tmco3,Itgb1bp1,Tom1,Rapsn,Riok3,Nudt7,1110003E01Rik,Trak1,S100a16,Mtcp1,Tollip,Ankrd29,Isca2,Atp6v0b,Mmab,Asb1,Tex264,Slc2a6,BC046404,Adamtsl4,1810046J19Rik,Scarb2,Slamf9,Fbxw4,Hint3,Shroom3 |
| <b>mmu-miR-19a</b>     | 33(776)                | 9,23E-05                 | Gtf2h5,2310028O11Rik,Snrpn,Mpv17,Sh3bgr,Wnt9a,Klf15,Btf3l4,Armc8,Skap2,Ankra2,Suox,Nipa1,Rora,Slc9a6,Impdh1,St3gal5,Glt8d1,Itr2,Reep3,Ankrd29,Ahnak,Atp5s,Kif3a,Acaa1a,Hadhb,Igbbp1,Scn1b,Chst12,Ltbp3,Zfp704,Vps29,Hhip                                                 |
| <b>mmu-miR-292-3p</b>  | 35(776)                | 9,24E-05                 | Ugp2,Usp2,Sgca,Plb1,Arvcf,Coq10a,Fahd2a,Fbxo9,Papss2,Tlr6,Insig2,Cobl,Hexa,Nfs1,Stx8,Ttc15,Apoa1bp,A430110N23Rik,Nudt7,St3gal5,Serpib9b,Slc22a4,Vnn1,Slc26a11,Mmab,Ahnak,Ikbkg,Ufc1,Csrp2,Cln7,Nudt18,Dhps,Ankrd12,Atp6v0a1,Tmem38a                                      |
| <b>mmu-miR-16</b>      | 33(776)                | 0,000101747              | Dym,Wdr47,Bri3,Sgca,Tcta,Tmem41a,Rab4b,Rab40b,Mtmr3,1110007C09Rik,Lyrm1,Fbxl2,Tpcn1,2010003O02Rik,Arl2,Ypel3,Shank3,Rapsn,Nudt7,St3gal5,Ly6c1,S100a16,Dopey2,Abtb2,Srp14,Frmpd1,Zfand2b,Ahnak,Nr2c1,Cdh7,1110034G24Rik,Irf3,Rabac1                                       |
| <b>mmu-miR-674</b>     | 32(776)                | 0,000102141              | Ap3s1,Dtx2,Snap91,Lrrc51,Prss36,Atp6v1e1,Abcd1,Vps8,Mrgprf,Ankra2,Gstm2,Ccdc64,Hsd3b3,2700078K21Rik,Rapsn,P4ha2,2700078E11Rik,Deb1,Ccdc80,Ing4,Gdap2,Grk4,Necap2,Ctsl,Ahnak,Htatip2,Cdkn1a,Scarb2,Slc25a35,Igbbp1,Tmem38a,Fads3                                          |
| <b>mmu-miR-146b*</b>   | 25(776)                | 0,000102592              | Ahnak2,Mpv17,Fbxo9,Rras,Ehd1,Lamb2,Trappc6a,F630110N24Rik,Adcy9,Alkbh6,2010003O02Rik,Ccdc64,2700078K21Rik,C1qtnf6,Slc35c2,Ly6c1,Reep3,Atg7,1300010F03Rik,Zfand2b,Chchd6,1110034G24Rik,Slc25a35,Slamf9,Lmna                                                               |
| <b>mmu-miR-93*</b>     | 28(776)                | 0,000103386              | Dym,Tmem41a,Higd1a,Tbc1d10a,Vps39,Akap13,Adcy9,Btf3l4,Clip1,Slc31a2,9430038I01Rik,5830405N20Rik,Ccdc64,Epb4.114b,Dopey2,BC089491,Plcb1,Srr,1300010F03Rik,Dhps,6330406I15Rik,Cox6a2,1810046J19Rik,Acaa1a,Tom112,Mrps14,Oplah,1700094D03Rik                                |
| <b>mmu-let-7g*</b>     | 34(776)                | 0,000107389              | Zfand3,Ap3s1,Ccdc126,Rab43,Rpl17,Kif27,Ascc2,Selm,Gadd45b,Atp9b,Mtmr3,Amhr2,Rarres2,Mrgprf,Skap2,Cacna1g,2900010M23Rik,Chrd,Stard6,L1cam,Man2b1,Mtap6,Wwp2,Asah1,Plcb1,Gpc4,Atp6v0b,Ahnak,Sirt2,Ssbp2,Tuba8,Ufc1,Cdh7,Acyp1                                              |
| <b>mmu-miR-365</b>     | 33(776)                | 0,000107761              | Pank2,Snap91,Map3k8,Col14a1,Sgca,Kif27,Tmem41a,Hexa,Ehd1,Nudt13,Trappc6a,Vps8,Fstl1,Arnt,Cdc42,Ep2,Tom1,Idua,Ttl7,Megf6,Add3,Ehd2,1110003E01Rik,Mustn1,Abtb2,Mmab,Mrpl55,Plac9,Ptdss1,Mras,Fzd6,Tmem38a,Ankrd44,Chpt1                                                    |
| <b>mmu-let-7a</b>      | 34(776)                | 0,000108965              | Ppp1r16a,Irfi35,Dtx2,Mcee,Cat,Tcta,Tmem41a,Alg14,Hexa,Sh3bgr,Rras,Elmo2,R74862,Cyp4v3,Trappc6a,Akap13,Gng5,Lama2,Camk1,Chrd,Lnx1,Slc35b1,Fabp3,Gdap2,Tollip,Isca2,App,zdhhc24,Ikbkg,Sema3f,1110034G24Rik,6330406I15Rik,1810046J19Rik,Kif3a                               |
| <b>mmu-miR-673-5p</b>  | 33(776)                | 0,000109407              | Ppp1r16a,Cox4nb,Dhrs3,Rab4b,Trpc7,Sema3b,Emilin2,R74862,Abcb6,Inpp5a,Loxl1,Cd248,Vps8,Sepw1,Epbb3,Trappc2l,Tcn2,Slc9a6,Ascc1,Nudt7,St3gal5,Ehd3,Ccdc80,Zdhhc8,Nol3,0610037L13Rik,Atp6v0b,Hck,Acyp1,Stxbp1,Cacna1b,Nagk,Shroom3                                           |
| <b>mmu-miR-683</b>     | 30(776)                | 0,000114705              | Map3k8,Hspa12a,Selm,Cyp27a1,Nt5m,Atp6v1e1,Slc7a7,Btf3l4,Mrgprf,Klk1b4,Hexb,Txnrd3,Arhgef12,Rora,Snta1,Ascc1,Slc22a4,Os9,Nupr1,Mtcp1,20101110I1Rik,Zfand2b,Zdhhc24,Ptprm,Mxra7,Vps24,Ufc1,Arhgap1,Kif3a,Gas6                                                              |
| <b>mmu-miR-681</b>     | 31(776)                | 0,000114737              | Mrc2,Ahnak2,Tssc4,Bri3,Ascc2,Adc,Fahd2a,Smpdl3a,Sema3b,Nt5m,Elmo2,Krt80,Nudt13,F630110N24Rik,Myadm,Tbcd,Vps8,Lyplal1,Dhrs1,Slc31a2,Stx8,Myom2,Tpcn1,Synpo,Ing4,Klf2,Bcml1,Slc25a39,Cox6a2,Haahb,Ltbp3                                                                    |
| <b>mmu-miR-801</b>     | 28(776)                | 0,000115869              | Plb1,Lgr4,Slc22a18,Tbcd,Btf3l4,Dgkg,Slc46a3,2010003O02Rik,Arl2,Itgb1bp1,Shank3,C1qtnf6,Garnl3,Nupr1,Akap4,Zfand2b,Rab7l1,Cdh7,Ndr4,Gpr39,Cox6a2,1810046J19Rik,Ckm,Acaa1a,Nhlrc1,Gas6,1810030N24Rik,Wdr7                                                                  |
| <b>mmu-miR-294</b>     | 30(776)                | 0,000116059              | Gtf2h5,Magi3,Crot,Smad6,Crybb3,Txnrd3,2010003O02Rik,Nudt7,2700078E11Rik,Serpib9b,Glt8d1,9130011J15Rik,Ing4,Dner,Lrp4,Mmab,Zfand2b,Ahnak,Clip4,Rab7l1,Csrp2,Sh3tc2,Acaa1a,Nhlrc1,Daglb,Uchl1,Zfp704,1700094D03Rik,Atp10d,Ankrd44                                          |
| <b>mmu-miR-453</b>     | 29(776)                | 0,00011651               | Ahnak2,Stmn3,Rab4b,Alg14,Sema3b,Cam1,Ank2,Tbcd,Slc7a7,Abcd1,Tmem87b,Camk1,Emp2,Tcn2,Cspg4,Impdh1,Snta1,Dusp8,Pon3,2310046K01Rik,Trak1,Trip1,Def8,Uqcrq,BC046404,Serf2,Igbbp1,Tbc1d9b,Wdr7                                                                                |



| <i>miRNA name</i>      | <i>Number of genes</i> | <i>Corrected p-value</i> | <i>miRNA targets among genes induced in Rasless cells (from Table S1)</i>                                                                                                                                                                                                                     |
|------------------------|------------------------|--------------------------|-----------------------------------------------------------------------------------------------------------------------------------------------------------------------------------------------------------------------------------------------------------------------------------------------|
| <b>mmu-miR-223</b>     | 30(776)                | 0,000125873              | Sgca,Mcee,Smpdl3a,Prss36,Cd248,Btf3l4,1700009P17Rik,Tmem87b,Tom1,Gp1bb,Dusp8,Tmem154,Lrch1,Tmem175,Mlycd,Slc22a4,Mtm1,Slc39a14,Usp53,Kif13b,Asb1,Tex264,Slc2a6,Slc25a35,Atp5e,Rhoj,Pcsk6,Ltbp3,Immp11,Aldh3a2                                                                                 |
| <b>mmu-miR-466g</b>    | 39(776)                | 0,000125957              | Ahnak2,Thra,Dtx2,2310028011Rik,Adra1b,Tmem41a,Smpdl3a,Insig2,Rab3d,5930434B04Rik,D16H22S680E,Stam2,Sync,Creb3,Dynlrb1,Dusp3,Qk,Gstm2,Guk1,Zbtb4,Myeov2,2700078K21Rik,Glt8d1,Zdhhc8,Ly6c1,Zmat2,Trak1,Grk4,Lrba,1300010F03Rik,Ahnak,Slco3a1,Rab7l1,Cdh7,1110034G24Rik,Kif3a,Tom1l2,Uchl1,Mtus1 |
| <b>mmu-miR-361</b>     | 29(776)                | 0,000132126              | Snrpn,Adc,Mpv17,Magi3,Rab38,D6Wsu163e,1810020D17Rik,Vps8,Gramd3,Klk1b4,Dhrs1,Mxra8,Ai317395,Myo6,Qpct,Stard6,Grik2,Iscu,Tollip,Ctsl,A930005H10Rik,Spata21,Acyp2,Ugt2b36,Slc1a4,Ptprm,Igfbp1,Zfp704,1700094D03Rik                                                                              |
| <b>mmu-miR-124*</b>    | 28(776)                | 0,000137134              | Iah1,Kif27,Crot,Smpdl3a,Insig2,Nt5m,Hexa,D16H22S680E,Lamb2,Cd248,Tgfb2,Vps8,Dgkg,Gpr133,Ttc15,Atp2a3,Igfb1bp1,Snta1,Vnn1,Acyp2,Usp53,Tmbim1,Chmp4c,Dhps,1810046J19Rik,Tom1l2,Slamf9,1700094D03Rik                                                                                             |
| <b>mmu-miR-761</b>     | 31(776)                | 0,000137197              | Ifi35,Usp2,Zbtb7c,Rab4b,Cd81,Trpv4,Gramd3,Txnrd3,Trappc2l,Arl2,Tcn2,L1cam,Pbxip1,Mtap6,Mocs2,Ulk2,Psen2,Ly6c1,Slc26a11,1300010F03Rik,Atp6v0b,BC029214,Slc25a39,Cbara1,Dnajc4,Tbc1d14,Atp6v0a1,Rabac1,Lmna,Limch1,2810428115Rik                                                                |
| <b>mmu-let-7f*</b>     | 33(776)                | 0,000137808              | Zfand3,Ap3s1,Map3k8,Bri3,Slc37a4,Lgr4,Ascc2,Cobl,Sh3bgr,Atp9b,Akap13,Btf3l4,1700009P17Rik,Skap2,Myom2,Lnx1,Gdf15,Snta1,Serpib9c,Glt8d1,Fabp3,Plcb1,Ctsl,Klf2,Tbccd1,Ssbp2,Sema3f,Cox6a2,Scarb2,Wdr7,Dusp22,Zfp704,Cacna1b                                                                     |
| <b>mmu-miR-291b-3p</b> | 36(776)                | 0,000145605              | Mcee,Hadha,Higd1a,Habp4,D16H22S680E,Smad6,Caml,Loxl1,D6Wsu163e,Iqsec2,Dynlrb1,Armc8,Clip1,Tmco3,Mxra8,Grina,L1cam,Rapsn,Nudt7,Idua,Dusp8,Adamtsl5,Nupr1,Pde6d,Mtm1,Srp14,App,Ahnak,Clip4,Rab7l1,Cog6,Atp5e,1500011K16Rik,Zfp704,Mtus1,Nagk                                                    |
| <b>mmu-miR-590-3p</b>  | 32(776)                | 0,000146754              | Pank2,Zfand3,Lgr4,Ascc2,Cyp27a1,Alg14,Stk39,Skap2,Ankra2,5830405N20Rik,Tob1,Qpct,Lnx1,Mtap6,Bphl,Mocs2,Ccdc80,Glt8d1,Sema3c,Slc22a4,Bbs5,Vnn1,Dopey2,Srp14,Pdia5,Acyp2,Ugt2b36,Ssbp2,Cdh7,Csrp2,Igfbp2,1810030N24Rik                                                                          |
| <b>mmu-miR-688</b>     | 30(776)                | 0,000147028              | Zfand3,Thra,Usp2,Slc37a4,Lgr4,Atp6v0e,Abcb6,Inpp5a,F630110N24Rik,Gramd3,Anxa3,Skap2,Camk1,Ephb3,Trappc2l,Ypel3,Cgnl1,Snta1,Cables1,Pik3ip1,Bbs5,Hgsnat,Rab7l1,Tbccd1,Csrp2,Tyrr1,Kif3a,Acaa1a,Tom1l2,Rit1                                                                                     |
| <b>mmu-miR-221</b>     | 30(776)                | 0,000148805              | Bri3,Sgca,Sema3b,Nt5m,Prss36,Trappc6a,Vps8,Lyplal1,Mrgprf,Skap2,Mrgpre,Gpr133,Alkbh6,Calm4,Dph1,Ctso,Zbtb4,Nudt7,Lims2,Ly6c1,Reep3,Ankr29,Zfand2b,Synpo2,Cxcr7,Htatip2,Tbc1d9b,Chst12,Pcsk6,Oplah                                                                                             |
| <b>mmu-miR-501-5p</b>  | 30(776)                | 0,000148805              | Acp2,Thra,Sgca,Ecm1,Ascc2,Tmem41a,Crot,Caml,Cd248,Slc35a2,Slc7a7,Grina,L1cam,Aldh6a1,Slc35b1,Megef6,Adar,Zfp560,Os9,Clip4,Tex264,Cpa6,Acaa1a,Igfbp2,Wscd2,Igfbp1,Tbc1d9b,Mdfic,Limch1,Zfp704                                                                                                  |
| <b>mmu-miR-470</b>     | 28(776)                | 0,000148876              | Ugp2,Tssc4,Ecm1,Dhrs3,Fbxo9,Prss36,Cd248,Mtmr3,Crybb3,Gng5,Cry2,Ap3m2,Ndel1,Ndufa10,Man2b1,Snta1,Nrip3,Ccdc80,Garnl3,Nkiras2,Npdc1,Spata21,Synpo2,Tex264,Cdh7,Csrp2,Rabac1,1700013F07Rik                                                                                                      |
| <b>mmu-miR-494</b>     | 27(776)                | 0,00014965               | Map3k8,Commd8,Mal,Rab38,Cyp4v3,Slc7a7,Vps8,Camk1,Qk,Appl2,Grina,Ndufa10,Zbtb4,Slc9a6,P4ha2,Grik2,Htra3,Pik3ip1,Mtcp1,Cyb5,Acyp2,Adamtsl4,Cox6a2,Dusp22,Vps29,Cacna1b,Immp11                                                                                                                   |
| <b>mmu-miR-743b-5p</b> | 32(776)                | 0,000153945              | Oit3,Copg,Stmn3,Plb1,Dscr3,Caml,Loxl1,Slc7a7,Vps8,Armc8,Ttc15,Myom2,Ccdc64,Qpct,Myeov2,Ppm1h,Gdap2,Atg7,Noi3,Pde6d,Slc26a11,Clip4,Usp53,BC046404,Adamtsl4,Daglb,Scarb2,9930013L23Rik,Slamf9,Lmna,Uchl1,Zfp704                                                                                 |
| <b>mmu-miR-216b</b>    | 32(776)                | 0,000160645              | Gtf2h5,Iah1,Plb1,Pef1,Tmem41a,Gpx4,Vps39,Copz2,Dab2ip,Adcy9,Slc46a3,9430038I01Rik,Hoxa1,Txnrd3,2010003O02Rik,Gstm2,Qpct,Zbtb4,Mocs2,2310046K01Rik,Trak1,Sh2d4a,Hgsnat,Srr,Npdc1,Necap2,A930005H10Rik,Hr,Fbxl20,Gpr39,1500011K16Rik,Tbc1d9b                                                    |
| <b>mmu-miR-27a*</b>    | 28(776)                | 0,000161062              | Usp2,Sema3b,Rras,Copz2,Gstm2,Grina,Zbtb4,Snta1,Dusp8,Mfap5,Anxa1,Rell2,Srr,Zfand2b,Ahnak,Spata21,Tex264,Plac9,Hck,Trp53inp2,Cdh7,Mras,Tom1l2,1500011K16Rik,1700021C14Rik,Stxbp1,Rabac1,Shroom3                                                                                                |
| <b>mmu-miR-21</b>      | 28(776)                | 0,000163308              | Gnptg,Yif1b,Kif27,Sh3bgr,Adcy9,Sgcb,Armc8,Lmbr1,Clip1,Tpcn1,2010003O02Rik,Ndel1,Farp2,Lnx1,Lrrc57,Akap4,Plcb1,Ctsl,Spata21,Ill17d,1110034G24Rik,Sparc,Acyp1,Reck,Rabac1,Satb1,Uchl1,Zfp704                                                                                                    |
| <b>mmu-miR-542-5p</b>  | 31(776)                | 0,000163734              | Tlr6,Lrrc51,Abcb6,Hist2h2bb,Inpp5a,Hdlbp,Acox1,Ank2,Dusp3,Copz2,Akap13,Vps8,Clip1,Dph1,Tpcn1,Gstm2,Trappc2l,Rell2,Adamtsl5,Vdac1,Os9,Slc39a14,Mrpl55,Slc41a3,Rab7l1,Bcno1,Csrp2,1810046J19Rik,Slamf9,Yif1a,Shroom3                                                                            |
| <b>mmu-miR-299</b>     | 29(776)                | 0,000171661              | Thra,Ap3s1,Klhl18,Trpv4,Creb3,Kif1c,Slc35a2,Gng5,Btf3l4,Lmbr1,Pigz,Dhrs1,Myom2,Lgals9,Alas1,Idua,Serpib9c,Ergic3,Slc35c2,Ly6c1,Hgsnat,Npdc1,Def8,Tanc2,Tuba8,Mras,Ckm,Pcsk6,Ltbp3                                                                                                             |
| <b>mmu-miR-29b</b>     | 35(776)                | 0,000172812              | Copg,Ccdc126,Slc37a4,Pmp22,Smpdl3a,Hexa,Sh3bgr,Habp4,Emilin2,Abcb6,Smad6,Vps8,Anxa3,Myo6,Ephb3,Tpcn1,Pdgfc,Qpct,Chrd,Impdh1,Asah1,Mfap5,Ccdc80,Fabp3,Ing4,Adamts2,Klf2,Tanc2,Nr2c1,Chmp4c,Fbxl20,Dhps,9930013L23Rik,Tubb2a,Dusp22                                                             |
| <b>mmu-miR-877*</b>    | 23(776)                | 0,000174793              | Sgca,Rab4b,Sema3b,Sh3bgr,Elmo2,Clstn1,Prss36,Loxl1,Crybb3,F630110N24Rik,Myo6,Txnrd3,Snta1,Adar,Nupr1,BC089491,Nenf,Pcvt1a,Zfand2b,Pdia5,4930579G22Rik,Mras,Igfbp2                                                                                                                             |

| <i>miRNA name</i>     | <i>Number of genes</i> | <i>Corrected p-value</i> | <i>miRNA targets among genes induced in Rasless cells (from Table S1)</i>                                                                                                                                                                                |
|-----------------------|------------------------|--------------------------|----------------------------------------------------------------------------------------------------------------------------------------------------------------------------------------------------------------------------------------------------------|
| <b>mmu-miR-744*</b>   | 25(776)                | 0,000183871              | Rnf13,Tssc4,Map3k8,Rab43,Stmn3,Ecm1,Hspa12a,Magi3,Sema3b,Napb,Nudt13,Ppp2r5b,D6Wsu163e,Iqsec2,Slc7a7,Rarres2,Camk1,Calm1,Repin1,Grina,Ascc1,Zfp560,Nupr1,Akap4,181004619Rik                                                                              |
| <b>mmu-miR-874</b>    | 30(776)                | 0,000185626              | Pank2,Rab43,Slc6a7,Prss29,Rab3d,Hexa,Clstn1,Ppp2r5b,Abcd1,Tbc1d22a,Trpt1,Alkbh6,Repin1,Synpo,Trappc2l,Guk1,Galns,Zbtb4,2700078K21Rik,Ergic3,Cdk5,Tmem154,Pxmp4,Dbp,Klf2,Ikbkg,Sema3f,Wscd2,Tbc1d9b,Lmna                                                  |
| <b>mmu-miR-707</b>    | 29(776)                | 0,000187443              | Cat,Commd8,Prss29,Trpc7,Fbxo9,Sh3bgr,Smad6,Cd248,Ank2,Slc35a2,Clip1,Tob1,Grina,Igta9,P4ha2,Ascc1,Cables1,Ccdc80,C330006K01Rik,Atg4a,Mlycd,Tollip,Mustn1,Pcbd2,Cxcr7,Ptprm,Sema3f,Ckm,Scarb2                                                              |
| <b>mmu-miR-715</b>    | 31(776)                | 0,000194854              | Ppp1r16a,Thra,Dtx2,Adra1b,Ecm1,Nt5m,Wnt9a,Abcb6,Hist2h2bb,Atp6v1e1,Trappc6a,Ank2,F630110N24Rik,Btf3l4,BC027231,Skap2,Ly6c1,Npdc1,Ahnak,Klf2,Kif13b,Ssbp2,Slc25a39,Zdhhc24,Gpr39,Acaa1a,Igfbp2,1810030N24Rik,Oplah,Ltbp3,Uchl1                            |
| <b>mmu-miR-30b*</b>   | 30(776)                | 0,00019849               | Pank2,Gpx4,R74862,Dusp3,Sgcb,Dhrs1,Hexb,Ankra2,Gpr133,Alkbh6,Ero1,Grina,Farp2,Nme2,Idua,Hist1h1e,Anxa1,Hbxip,Trak1,Ctsb,1300010F03Rik,Asb1,Nr2c1,Fbxl20,Fbn2,Adamts14,Ckm,Slc25a35,Igfbp2,Cacna1b                                                        |
| <b>mmu-let-7i*</b>    | 31(776)                | 0,000203429              | Lgr4,Ascc2,Dhrs3,Ehd1,Abcb6,Cyp4v3,Gadd45b,Upk3b,Atp6v1e1,Tgfb2,Renbp,Armc8,Gramd3,Ccny,Anxa3,Cacna1g,Grina,Gdf15,Snta1,Mocs2,Adamts5,Pxmp4,Gpc4,1300010F03Rik,Cog6,Cox6a2,Hadhb,Slamf9,Cpeb1,Wdr7,Lrsam1                                                |
| <b>mmu-miR-130b</b>   | 33(776)                | 0,000204417              | Dym,Dtx2,Map3k8,Ubl1,Sh3bgr,Elmo2,Habp4,Stk39,Gadd45b,Atp9b,D6Wsu163e,Btf3l4,Mrgprf,Sgcb,Ankra2,Myom2,Ndel1,Grina,Ensa,Vdac1,Akap4,Plcb1,Ankrd29,Adamts2,Tanc2,Chchd6,Acyp2,Chmp4c,Hadhb, Tpp1,Tmem9b,Ankrd44,3110002H16Rik                              |
| <b>mmu-miR-293</b>    | 30(776)                | 0,000205473              | Stmn3,Birc7,Hexa,Dynlrb1,Crybb3,Rhbdd1,Tmem87b,Ankra2,Myom2,Lgals9,Ccdc64,Farp2,Epb4.1I4b,Impdh1,Mfap5,Glt8d1,Bbs5,Ing4,Srp14,Slc39a14,Asb1,Ssbp2,Ikbkg,Htatip2,Acaa1a,Tom1l2,Cpeb1,2610019F03Rik,Chst12,Yif1a                                           |
| <b>mmu-miR-409-5p</b> | 32(776)                | 0,000205734              | Ahnak2,Dtx2,Sqrdl,Commd8,Prss29,Gpx4,Alg14,5930434B04Rik,Habp4,Rassf3,Nudt13,Creb3,Tgfb2,Ank2,Tbcd,1810020D17Rik,BC027231,Gpr133,Galns,Wisp2,Rora,Shank3,2700078K21Rik,P4ha2,Serpinb9c,Mfap5,1810037117Rik,2900026A02Rik,Cdkn1a,6330406115Rik,Wdr7,Pcsk6 |
| <b>mmu-miR-191</b>    | 29(776)                | 0,000208278              | 1300014I06Rik,Stmn3,Plb1,Kremen1,Fbxo9,Atp9b,D6Wsu163e,Cd248,Vps39,Gramd3,Anxa3,Dlg2,Zbtb4,Slc9a6,Tom1,Ppt2,Glt8d1,Pxmp4,Ctsl,Pdia5,Rab71l1,Ssbp2,Ptprm,Kif3a,Slamf9,Tubb2a,Satb1,Uchl1,Chpt1                                                            |
| <b>mmu-miR-142-3p</b> | 30(776)                | 0,000225564              | Ahnak2,Alg14,Rras,Inpp5a,Atp6v1e1,Creb3,Dusp3,Abcd1,Tmem87b,Ttc15,Qpct,Dusp8,Lrrc57,Glt8d1,Adar,Bbs5,1300010F03Rik,Def8,Pdia5,Acyp2,l117d,Fzd8,Nr2c1,Vps24,Cdh7,Htatip2,Acaa1a,Tbc1d9b,Cyb5r3,Hinnt3                                                     |
| <b>mmu-let-7b</b>     | 34(776)                | 0,000226018              | Ppp1r16a,Dtx2,Col14a1,Mcee,Rab4b,Rras,R74862,Prss36,Cyp4v3,Trappc6a,Akap13,Vps8,Gng5,Pigz,Lama2,Bmp4,Tcn2,Itgb1bp1,Chrd,Lnx1,Slc35b1,Ppt2,Glt8d1,Fabp3,Os9,Ing4,Gdap2,2010111I01Rik,Isca2,BC029214,Sema3f,1110034G24Rik,1810046J19Rik,Slamf9             |
| <b>mmu-miR-19b</b>    | 31(776)                | 0,00022638               | Snrpn,Mpv17,Sh3bgr,Wnt9a,Atp6v1e1,Btf3l4,Armc8,Skap2,Ankra2,Mkrn1,Suox,Rora,Slc9a6,Impdh1,St3g al5,Glt8d1,Itpr2,Ankrd29,Ahnak,Atp5s,Ptprm,Itfg3,Kif3a,Hadhb,Igfbp1,1500011K16Rik,Scn1b,Ltbp3,Vps29,Hhip,Atp10d                                           |
| <b>mmu-miR-721</b>    | 32(776)                | 0,000227093              | Dym,Dtx2,Rab43,Cd81,Stk39,Gadd45b,D6Wsu163e,Adcy9,Sgcb,Armc8,Ankra2,Myom2,Ndel1,Dlg2,Ensa,Mfap5,Htra3,2310046K01Rik,Akap4,Mtcp1,Acyp2,Tbccd1,Ptprm,Hadhb,Tpp1,Slamf9,1500011K16Rik,Cpeb1,Vps29,Tmem9b,Ankrd44,3110002H16Rik                              |
| <b>mmu-miR-27b*</b>   | 27(776)                | 0,00023078               | Bri3,Tlr6,Insig2,Sema3b,Cobl,AI593442,Trappc6a,2010003O02Rik,Bphl,Ascc1,Dusp8,Lrrc57,Iscu,Cdk5,Isca2,Zfand2b,Nr2c1,1110034G24Rik,Fbn2,Mras,Cbara1,Ckm,Scarb2,Igfbp2,Dusp22,Mtus1,3110002H16Rik                                                           |
| <b>mmu-miR-615-3p</b> | 32(776)                | 0,000231823              | Mrc2,Thra,Yif1b,Mpv17,Prss29,Rras,Smad6,Rassf3,Trpv4,Trappc6a,Ank2,Txnrd3,Tob1,Arl2,Ypel3,Shank3,Pbxip1,Ppt2,Lims2,Rel2,Bbs5,BC089491,Srp14,Atp6v0b,Zfand2b,Tanc2,Ptdss1,Vps24,Itfg3,Esrrb,C1qtnf1,Dmpk                                                  |
| <b>mmu-miR-101b</b>   | 34(776)                | 0,00025016               | Ppp1r16a,Dym,Zfand3,Ap3s1,Dtx2,Map3k8,Sgca,Mcee,Trpc7,Smpdl3a,Rab38,Napb,Abcb6,Stam2,Ppapdc3,Ccdc64,Ndufa10,Mtap6,Ascc1,Mfap5,Mlycd,Ing4,Dopey2,Necap2,Srp14,Serf2,Htatip2,Ndrgr4,Acaa1a,Cdkn2b,Tbc1d14,Fzd6,Atp6v0a1,Tubb2a                             |
| <b>mmu-miR-505</b>    | 30(776)                | 0,000264035              | Fbxo9,Tmem135,Wnt9a,Cyp4v3,Vps39,Tgfb2,Rhbdd1,9430038I01Rik,Ap3m2,2900010M23Rik,4933439F18Rik,Lrrc57,Ulk2,Itpr2,Gdap2,Atg7,Plcb1,Gpc4,Ctsl,Atp6v0b,Atg12,Cyb5,Fzd8,Hck,1810027O10Rik,Mras,Tyrrp1,Igfbp2,Fbxw4,Tubb2a                                     |
| <b>mmu-miR-873</b>    | 31(776)                | 0,000267998              | Hspa12a,Ascc2,Selm,Cyp27a1,Rab38,AI593442,Ppapdc3,Adcy9,Pld1,Arnt,Camk1,Sepw1,Myom2,Appl2,Nme2,Shank3,Slc9a6,P4ha2,Cables1,913001115Rik,S100a16,Mtcp1,Nol3,Tanc2,Tbccd1,Ssbp2,Hr,Ufc1,Hadhb,Uchl1,Dmpk                                                   |
| <b>mmu-let-7d</b>     | 33(776)                | 0,000284971              | Ppp1r16a,Iifi35,Bri3,Mcee,Tmem41a,Rab4b,Alg14,Hexa,Sh3bgr,Rras,Elmo2,Atp6v0e,R74862,Cyp4v3,Trappc6a,Akap13,Gng5,Lmbr1,Camk1,Suox,Galns,Chrd,Slc35b1,Fabp3,Gdap2,Ugt2b36,Ikbkg,1110034G24Rik,1810046J19Rik,Kif3a,Slc25a35,Wscd2,Tubb2a                    |

| <i>miRNA name</i>     | <i>Number of genes</i> | <i>Corrected p-value</i> | <i>miRNA targets among genes induced in Rasless cells (from Table S1)</i>                                                                                                                                                                      |
|-----------------------|------------------------|--------------------------|------------------------------------------------------------------------------------------------------------------------------------------------------------------------------------------------------------------------------------------------|
| <b>mmu-miR-140*</b>   | 29(776)                | 0,000289688              | Usp2,Slc37a4,Higd1a,Adamts5,Serpib6c,Sepw1,Trappc2l,Guk1,Ndel1,Ascc1,Ehd3,Glt8d1,Slc35c2,Exoc3,Mlycd,S100a16,4930523C07Rik,BC029214,Il17d,Tex264,Cxcr7,Fbxl20,Htatip2,1810046J19Rik,Stx7,Tbc1d14,Dusp22,Cacna1b,1700094D03Rik                  |
| <b>mmu-miR-182</b>    | 31(776)                | 0,000292629              | Wdr47,Slc37a4,Ascc2,Gyg,S100a1,Paps2,Nt5m,Cobl,Mtap1a,Atp6v0e,Inpp5a,Nudt13,Copz2,Pld1,Tob1,Grina,Irgb1bp1,Lnx1,L1cam,Deb1,Tollip,Npdc1,Srp14,Galc,Rab7l1,Ugt2b36,6530401N04Rik,Asb1,Sema3f,Vps24,Slc2a8                                       |
| <b>mmu-miR-872</b>    | 28(776)                | 0,000301517              | Iah1,Sqrdl,Col14a1,Plb1,Gyg,Arvcf,Trpc7,Rab40b,Tgfb2,Serpib6c,Slc7a7,BC027231,Ankra2,Cacna1g,Ras12,Suox,Gstk1,Aldh6a1,Iscu,Ccdc80,4930523C07Rik,A930005H10Rik,Tbccd1,Nr2c1,Nhlrc1,1810030N24Rik,Wdr7,Hint3                                     |
| <b>mmu-let-7c</b>     | 34(776)                | 0,000314159              | Ppp1r16a,Dtx2,Mcee,Tmem41a,Rab4b,Alg14,Sh3bgr,Rras,R74862,Cyp4v3,Trappc6a,Akap13,Gng5,Lama2,Camk1,Galns,Tcn2,Chrd,Lnx1,Slc35b1,Tll7,Fabp3,Ing4,Gdap2,Tollip,Isca2,BC029214,Tex264,Ikkg,Sema3f,1110034G24Rik,6330406I15Rik,1810046J19Rik,Slamf9 |
| <b>mmu-miR-677</b>    | 28(776)                | 0,000315566              | Col14a1,Glrb,Hexa,Sh3bgr,Rras,Lyrm1,Dhrs1,Skap2,Slc46a3,Rragc,Guk1,Hsd3b3,Ascc1,Mfap5,Ccdc80,Glt8d1,Fabp3,Ulk2,Os9,Pde6d,Ahnak,Tanc2,Acyp2,Fbn2,Cog6,Slc25a35,Slamf9,Reck                                                                      |
| <b>mmu-miR-708*</b>   | 25(776)                | 0,000322409              | 1810058I24Rik,Gpx4,Tlr6,Abcb6,Stk39,Iqsec2,1110007C09Rik,Cacna1g,Serpib9b,Glt8d1,Psen2,Trak1,Zfand2b,Slc39a14,Ssbp2,Cxcr7,Slc2a6,Tuba8,Cpeb1,Tbc1d9b,Tmem38a,Satb1,Uchl1,1700094D03Rik,Aldh3a2                                                 |
| <b>mmu-let-7g</b>     | 33(776)                | 0,000326447              | Ppp1r16a,Dtx2,Mcee,Sh3bgr,Rras,R74862,Cyp4v3,Trappc6a,Akap13,Gng5,Skap2,Ankra2,Gstk1,Irgb1bp1,Chrd,Slc35b1,Tll7,Fabp3,Rel2,Mtm1,Isca2,BC029214,App,Ahnak,Zdhc24,Ptprm,1110034G24Rik,6330406I15Rik,Kif3a,Tom1l2,Tpp1,Wscd2,Vps29                |
| <b>mmu-miR-34a</b>    | 34(776)                | 0,000361235              | Fbxo9,Hexa,Rras,Nudt13,Nfs1,1700009P17Rik,Ttc15,Rab3gap2,Tpcn1,Suox,Nfe2l1,Pbxip1,Nrip3,Deb1,Rel2,Serinc3,Atg7,BC089491,Mtcp1,Mustn1,Trip1,Mtm1,Ankrd29,Pde4dip,Slco3a1,Acyp2,Tex264,Ikkg,Nhlrc1,Wscd2,Rhoj,Scn1b,Lmna,1700094D03Rik           |
| <b>mmu-miR-342-5p</b> | 30(776)                | 0,000362152              | Sgca,Hexa,D16H22S680E,Slc16a9,Tbcd,Armc8,Slc44a1,Ccdc64,L1cam,Lims2,Ccdc80,Lrch1,S100a13,Os9,Ing4,Pltp,Isca2,Gabarap,Slc2a6,Hr,Ikkg,Tom1l2,Atp6v0a1,Tbc1d9b,Chst12,Tubb2a,Oplah,Dmpk,Fads3,Aph1a                                               |
| <b>mmu-miR-503</b>    | 30(776)                | 0,000368143              | Pank2,Ahnak2,Thra,Usp2,Sgca,Kremen1,Arvcf,Rab4b,Higd1a,Atp6v1e1,Lyrm1,Pigz,Arl2,C1qtnf6,Rapsn,Ppt2,Tll7,2310046K01Rik,Mlycd,S100a16,Srp14,1300010F03Rik,BC029214,Zfand2b,Slc25a39,Cbara1,Ckm,Dnajc4,Rabac1,Dmpk                                |
| <b>mmu-miR-200b</b>   | 33(776)                | 0,000369487              | Pank2,Ugp2,Wdr47,Plb1,Crot,Lrrc51,Atp6v0e,Krt80,Stam2,Fn1,Serpib6c,Slc35a2,Akap13,Slc44a1,Nipa1,Aldh6a1,P4ha2,St3gal5,Dusp8,Nrip3,Ccdc80,Tmem154,Ly6c1,Slc25a39,Acyp1,Scarb2,Slamf9,1500011K16Rik,Reck,Wdr7,Tubb2a,Npc1,Ankrd44                |
| <b>mmu-miR-217</b>    | 29(776)                | 0,000374805              | Zfp78,Kctd9,Col14a1,Magi3,Fbln5,Glrb,Rbms2,Emilin2,Fn1,Atp9b,Lyplal1,Skap2,Slc46a3,Fndc3b,Ttc15,Grik2,Iscu,Tmem154,Sned1,Dbp,Adamts2,Slc26a11,Sstr4,Tanc2,Asb1,Uqcrq,Kif3a,Acaa1a,Fbxw4                                                        |
| <b>mmu-miR-671-3p</b> | 32(776)                | 0,000376395              | Ppp1r16a,Ugp2,Kremen1,Trpc7,Krt80,Nudt13,Vps39,Copz2,Renbp,Pigz,Clip1,Emp2,Gstk1,Zbtb4,Cspg4,C1qtnf6,Tll7,Sned1,Sorbs3,Mrp155,Klf2,Kif13b,6530401N04Rik,Tex264,BC004004,Dhps,Scarb2,Tom1l2,Slc25a35,Igfbp2,Igfbp1,Zfp704                       |
| <b>mmu-miR-675-5p</b> | 32(776)                | 0,000376395              | Yif1b,Bri3,Sgca,Slc37a4,Hadha,Kremen1,Atp6v0e,Cd81,Clstn1,Trpv4,Upk3b,Crybb3,Dusp3,Renbp,Myo6,Guk1,Tcn2,Rapsn,Dusp8,Tmem175,Rel2,Dner,Pltp,Srp14,Atp6v0b,1700016M24Rik,Tex264,Cdkn1a,Dhps,Atp6v0a1,Cpeb1,Camkk1                                |
| <b>mmu-miR-654-3p</b> | 31(776)                | 0,000381689              | Zfand3,Iah1,Kctd9,Ccdc126,Rab43,Commd8,Arvcf,Alg14,5930434B04Rik,Prss36,Tbcd,Akap13,Pld1,Vps8,Btf3l4,Tmem87b,Mapk4,Arhgef12,Shank3,Grik2,Nrip3,Mfap5,Rel2,Bbs5,Nol3,Dbp,Isca2,Tanc2,Cox6a2,Prelp,1700021C14Rik                                 |
| <b>mmu-miR-433</b>    | 28(776)                | 0,000393196              | Tssc4,Stmn3,Magi3,Dhrs3,Smpd3a,Napb,Adamts5,Sync,Upk3b,F630110N24Rik,Tbcd,Slc44a1,Galns,Herpud2,Arl2,Lnx1,Hbxip,Bbs5,Vnn1,Mustn1,Dbp,Ctsl,Slc39a14,Ahnak,Bcno1,Mxra7,Cox6b1,Zfp704                                                             |
| <b>mmu-miR-701</b>    | 28(776)                | 0,000401996              | Slc37a4,Plb1,Samd8,Cobl,Fem1a,R74862,Smad6,Qk,Mxra8,9430038I01Rik,Cacna1g,Synpo,Zbtb4,Rapsn,P4ha2,Idua,Mlycd,Itrp2,Dopey2,BC089491,Gpc4,Slc41a3,Ugt2b36,Glipr1,Fbxl20,1110034G24Rik,6330406I15Rik,Igfbp2                                       |
| <b>mmu-miR-128a</b>   | 31(776)                | 0,000415365              | Ppp1r16a,Dym,Hadha,Rras,Smad6,Klf15,Nfs1,Sgcb,Clip1,Skap2,Guk1,Ypel3,Ascc1,Nrip3,Rel2,Psen2,Mlycd,Akap4,Sh2d4a,Grk4,Ankrd29,Npdc1,Galc,Il17d,Fbxl20,Sh3tc2,Tyrrp1,1810046J19Rik,1810030N24Rik,Chst12,1700094D03Rik                             |
| <b>mmu-miR-667</b>    | 30(776)                | 0,000443319              | Dtx2,Tssc4,Plb1,Trpc7,Sh3bgr,Creb3,Vps39,Iqsec2,BC027231,Arl2,Zbtb4,Tom1,P4ha2,Nudt7,Lims2,Zmat2,Ing4,Trip1,Necap2,Abhd5,Rab7l1,Cxcr7,Sema3f,Slc25a35,Ankrd12,Igfbp2,Tbc1d9b,Tmem38a,Limch1,Oplah                                              |
| <b>mmu-miR-770-5p</b> | 30(776)                | 0,000452461              | Rpl17,Adc,Gyg,Tmem41a,Abcb6,Stam2,Tbcd,Adcy9,1810020D17Rik,Klk1b4,Dhrs1,Slc31a2,Cdc42ep2,Myo6,Chrd,Igfa9,Ascc1,Idua,Mocs2,Pik3ip1,Ccdc80,Ing4,Sned1,Atp6v0b,Kif13b,6530401N04Rik,Tex264,Ndrgr4,Igfbp1,Cpeb1                                    |

| <i>miRNA name</i>      | <i>Number of genes</i> | <i>Corrected p-value</i> | <i>miRNA targets among genes induced in Rasless cells (from Table S1)</i>                                                                                                                                                                          |
|------------------------|------------------------|--------------------------|----------------------------------------------------------------------------------------------------------------------------------------------------------------------------------------------------------------------------------------------------|
| <b>mmu-miR-433*</b>    | 23(776)                | 0,000467081              | Col14a1,Rab43,Adc,Stam2,Skap2,Arnt,Dok4,Ccdc64,Galns,Rora,Serp9b9c,Serp9b9b,Deb1,Hbxip,Mlycd,Ing4,Tollip,Srr,Sparc,Sh3tc2,Cdkn2b,Gas6,Yif1a                                                                                                        |
| <b>mmu-miR-298</b>     | 27(776)                | 0,000472277              | Dtx2,Rab4b,Elmo2,Atp6v0e,Gadd45b,Creb3,Slc35a2,Pigz,Suox,Galns,Arhgef12,Fabp3,Ing4,Mustn1,Srp14,1300010F03Rik,Klf2,Kif13b,Mxra7,Fbxl20,Cdkn1a,181004619Rik,Tbc1d9b,Lmna,Tubb2a,Cox6b1,2810428115Rik                                                |
| <b>mmu-miR-713</b>     | 28(776)                | 0,000472577              | Dtx2,2310028011Rik,Ecm1,Rpl17,Commd8,Crot,Insig2,Lrrc51,Cd81,Prss36,Sync,Vps8,Mrgprf,Anxa3,Tpcn1,Arl2,Wisp2,Iscu,Ccdc80,Zmat2,Ankrd29,201011101Rik,Cryab,Lrba,Ctstl,Slc26a11,Hck,Sh3tc2                                                            |
| <b>mmu-miR-547</b>     | 28(776)                | 0,000480899              | Tcta,Magi3,D16H22S680E,Cyp4v3,Cd248,Tbcd,Mrgprf,5830405N20Rik,Ccdc64,Suox,Zbtb4,Slc9a6,Cables1,Adar,Itp2,Nol3,Pxmp4,0610037L13Rik,Mrpl55,Tex264,Nr2c1,Vamp3,Vps24,Cdh7,Gpr39,Tom1l2,Cacna1b,3110002H16Rik                                          |
| <b>mmu-miR-465a-3p</b> | 31(776)                | 0,000482604              | Zfand3,Ccdc126,Slc37a4,Adc,9030409G11Rik,Tlr6,Nt5m,Kcnn1,Caml,D6Wsu163e,Vps39,Dusp3,Anxa3,Arnt,Myo6,Ypel3,Rora,Rapsn,Lrrc57,Grik2,Adamts15,Naga,Grk4,201011101Rik,Ptprm,Cdh7,Clcn7,Cox6a2,Rhvj,Ltp3,Yif1a                                          |
| <b>mmu-miR-207</b>     | 25(776)                | 0,000482645              | Thra,Adra1b,Sgca,Sh3bgr,Gadd45b,F630110N24Rik,Skap2,Alkbh6,Lgals9,Chrd,Slc9a6,Nfe2l1,Cspg4,Snta1,Ehd3,Cables1,Rel2,Nupr1,BC089491,Nenf,Hgsnat,Zfand2b,Mras,2900026A02Rik,Igfbp2                                                                    |
| <b>mmu-miR-218</b>     | 28(776)                | 0,000483348              | Commd8,Lgr4,Mpv17,Crot,Glrp,Adamts5,Stam2,Slc44a1,Cacna1g,Pdgfc,Tob1,Herpud2,Hsd3b3,Slc9a6,Mocs2,Ehd3,Htra3,Nkiras2,Mtcp1,Zfand2b,Acyp2,Il17d,Ptprm,Csrp2,Cox6a2,Slc25a35,1810030N24Rik,Tmub2                                                      |
| <b>mmu-miR-215</b>     | 29(776)                | 0,00048354               | Tssc4,Ubl4,Prss29,Fbxo9,Ppapdc3,Caml,Clip1,Slc31a2,AI317395,Hoxa1,Pdgfc,Epb4.1l4b,Snta1,Lrrc57,Garnl3,9130011J15Rik,Hbxip,Atg4a,Ly6c1,Ing4,Mrpl55,Pcbd2,Sparc,Cog6,Ankrd12,Tbc1d14,Slc2a8,Npc1,Shroom3                                             |
| <b>mmu-miR-467a</b>    | 34(776)                | 0,00048374               | Ugp2,Magi3,Coq10a,Alg14,Hexa,Sh3bgr,Stam2,Clstn1,Hdlbp,Trpv4,Armc8,Ttc15,Mkrn1,Farp2,Nudt7,Dusp8,Serp9b9b,Tll7,Htra3,Slc22a4,Bbs5,Trak1,Ntn4,Vnn1,Dopey2,201011101Rik,Ikbkg,Ufc1,Cdkn1a,Tom1l2,1700021C14Rik,Oplah,Dusp22,1700094D03Rik            |
| <b>mmu-miR-487b</b>    | 29(776)                | 0,000487702              | Dtx2,Rnf13,Kif27,Zbtb7c,Ascc2,Cyp27a1,Cd81,Cyp4v3,Rhbdd1,Skap2,Mxra8,Hoxa1,Tob1,Qpct,Lnx1,Mocs2,Asah1,Anxa1,Slc6a8,Sema3c,Slc26a11,Pcbd2,Rab71l,Tbccd1,Acyp1,Cog6,Adamts14,Ankrd12,Immp1l                                                          |
| <b>mmu-miR-199a-5p</b> | 32(776)                | 0,000507975              | Ppp1r16a,Tssc4,Sgca,Fbxo9,Hexa,Sh3bgr,Sync,Iqsec2,Pld1,Pigz,Ndel1,Pik3ip1,Tmem175,Akap4,Grk4,Necap2,Def8,Tanc2,Tbccd1,Slc2a6,BC004004,Sparc,Csrp2,Daglb,Tom1l2,9930013L23Rik,Igfbp2,Gas6,Fbxw4,At6v0a1,Chst12,Cyb5r3                               |
| <b>mmu-miR-324-5p</b>  | 32(776)                | 0,000517689              | Thra,Copg,Sgca,Cox4nb,Ascc2,Mpv17,Tcta,Clstn1,Cd248,F630110N24Rik,Tbcd,Slc7a7,Abcd1,1700009P17Rik,Suox,Chrd,Tom1,Nfe2l1,Myeov2,Psen2,Mlycd,Vdac1,Nkiras2,Trip1,Plcb1,Galc,App,Slco3a1,Nr2c1,Chmp4c,Acaa1a,Slc2a8                                   |
| <b>mmu-let-7a*</b>     | 30(776)                | 0,0005211                | Zfand3,Map3k8,Bri3,Slc37a4,Ascc2,Cobl,Sh3bgr,Caml,Atp9b,Btf3l4,Anxa3,Skap2,Myom2,Gdf15,Tom1,Snta1,St3gal5,Serp9b9c,Pon3,Plcb1,Ctstl,Klf2,Tbccd1,Ssbp2,Sema3f,Ufc1,Wdr7,Dusp22,Zfp704,Cacna1b                                                       |
| <b>mmu-miR-709</b>     | 36(776)                | 0,000539647              | Acp2,Arvcf,Rab4b,1810058124Rik,Nt5m,Hexa,Elmo2,Krt80,Nudt13,Trappc6a,Akap13,Vps8,Pigz,Cdc42ep2,Stx8,Tpcn1,Trim36,Suox,Igfbp1,Impdh1,2700078K21Rik,Rapsn,Mmaa,Pik3ip1,Adamts15,Os9,Ing4,Mtm1,1300010F03Rik,Ahnak,Hr,Vamp3,Mxra7,Sema3f,Slc25a35,Agl |
| <b>mmu-let-7b*</b>     | 30(776)                | 0,00054026               | Zfand3,Dtx2,Bri3,Slc37a4,Ascc2,Sh3bgr,Abcb6,AI593442,Atp9b,Akap13,Btf3l4,Anxa3,Skap2,Myom2,Gdf15,Snta1,Fabp3,9130011J15Rik,Plcb1,Ctstl,App,Klf2,Pcbd2,Tbccd1,Sema3f,Ufc1,Ckm,Wdr7,Dusp22,Zfp704                                                    |
| <b>mmu-miR-147</b>     | 29(776)                | 0,000541125              | Yif1b,Copg,Pef1,Trpc7,Alg14,Elmo2,Atp6v0e,Emilin2,Dscr3,AI593442,Upk3b,Atp9b,Lamb2,Vps8,Gabarapl1,Anxa3,Synpo,Chrd,Serp9b9b,Nupr1,Nol3,Pde6d,Pltp,Npdc1,201011101Rik,Cox6a2,Gas6,Tbc1d9b,Cyb5r3                                                    |
| <b>mmu-miR-329</b>     | 29(776)                | 0,000548041              | Ahnak,Dtx2,Adra1b,Stmn3,Fuca2,Nt5m,Fem1a,Clstn1,Smad6,Ank2,Slc7a7,Pld1,Tmem87b,Ttc15,Atp2a3,Synpo,Rora,Mlycd,Slc22a4,Os9,Sned1,4930523C07Rik,Def8,Ahnak,Tbccd1,Acaa1a,Igfbp2,Dusp22,Mtus1                                                          |
| <b>mmu-miR-200c*</b>   | 25(776)                | 0,000548321              | Maob,Zhx1,Krt80,Ank2,Slc44a1,2900010M23Rik,Chrd,Cables1,Mmaa,Tmem175,Slc22a4,Ly6c1,Srp14,Tanc2,Gstp1,Htatip2,Sh3tc2,Acaa1a,Tom1l2,Cdkn2b,Wscd2,Atp6v0a1,Mdfic,Chst12,Uchl1                                                                         |
| <b>mmu-miR-378*</b>    | 25(776)                | 0,000559282              | Thra,Tssc4,Up2,Sgca,Atp6v0e,Crybb3,Vps8,Armc8,Camk1,Cdc42ep2,Calml4,Lgals9,Shank3,Ascc1,Lrrc57,Tmem154,Mtcp1,Srr,Spata21,Atp5s,Nr2c1,Chmp4c,Cdkn1a,9930013L23Rik,Zfp704                                                                            |
| <b>mmu-miR-196b</b>    | 32(776)                | 0,000574965              | Pank2,Crat,Dtx2,Col14a1,Plb1,Upk3b,Atp6v1e1,Dynlrb1,Vps8,Gng5,Lmbr1,Lama2,9430038I01Rik,Alkbh6,Ttc15,2900010M23Rik,Arl2,Slc9a6,Cspg4,Myeov2,Cdk5,Deb1,Anxa1,Pde4dip,Def8,Tex264,Uqcrq,Cpa6,ORF63,Csrp2,Mras,Typr1                                  |
| <b>mmu-miR-876-3p</b>  | 30(776)                | 0,000596786              | Rnf13,Snap91,Gnptg,Pmp22,Lgr4,Fuca2,Crot,Wnt9a,Gng5,Anxa3,Arnt,Alkbh6,Rab3gap2,Tpcn1,201003O02Rik,Myeov2,Glt8d1,Adamts15,Ly6c1,Mustn1,Slco3a1,Pcbd2,Cyb5,Cpa6,Acyp1,Mras,Cdkn2b,Cyb5r3,Cox6b1,Immp1l                                               |
| <b>mmu-miR-302d</b>    | 31(776)                | 0,000601944              | Maob,Papss2,Ehd1,Emilin2,Loxl1,Crybb3,Dhrs1,Rragc,2010003O02Rik,Nudt7,2700078E11Rik,Serp9b9b,9130011J15Rik,Os9,Serinc3,Trip1,Pde4dip,1810037117Rik,Clip4,Rab71l,Nr2c1,Csrp2,Mras,Sh3tc2,Cdkn1a,Cpeb1,Wdr7,Uchl1,Zfp704,1700094D03Rik,Ankrd44       |

| <i>miRNA name</i>     | <i>Number of genes</i> | <i>Corrected p-value</i> | <i>miRNA targets among genes induced in Rasless cells (from Table S1)</i>                                                                                                                                                       |
|-----------------------|------------------------|--------------------------|---------------------------------------------------------------------------------------------------------------------------------------------------------------------------------------------------------------------------------|
| <b>mmu-miR-190</b>    | 26(776)                | 0,000602075              | Mcee,Ctbs,Cd81,BC027231,Lama2,Rab3gap2,Grik2,Dopey2,Mtcp1,Tollip,Plcb1,Mtm1,Cryab,Iasca,Glo1,Cyb5,Ugt2b36,Cdh7,Acyp1,Cox6a2,Gas6,Chst12,Tmem50b,Hint3,Immp11,Mtus1                                                              |
| <b>mmu-miR-129-3p</b> | 29(776)                | 0,000604891              | Kif27,Tbc1d10a,Sync,Nudt13,Clip1,Lgals9,Arl2,Tom1,St3gal5,Mocs2,Nrip3,Pik3ip1,Ppm1h,Tmem175,Atg7,Dopey2,BC089491,Cryab,Lrp4,Ahnak,Clip4,Ikkg,Sema3f,Fbxl20,Cox6a2,Gas6,Rabac1,Fads3,Shroom3                                     |
| <b>mmu-miR-759</b>    | 27(776)                | 0,000618404              | Ugp2,Sgca,Stmn3,Camk4,Mpv17,Smpdl3a,Atp6v0e,Cd81,Smad6,Ank2,Crybb3,Copz2,Mrgprf,Gramd3,Lmbr1,Dhrs1,2010003002Rik,Ras12,St3gal5,Tmem175,Hbxip,Slc26a11,Gabarap,Cog6,Cox6a2,1500011K16Rik,Immp11                                  |
| <b>mmu-miR-1</b>      | 27(776)                | 0,000618404              | Sh3bgr,Mtap1a,Abcb6,Fn1,Gadd45b,D6Wsu163e,Ank2,Btf3l4,Sgcb,Dgkg,Lmbr1,Hexb,2010003002Rik,P4ha2,Lrch1,Dopey2,Pde6d,Ankrd29,App,Def8,Vps24,Fbn2,Dhps,Kif3a,Cpeb1,Hhip,Npc1                                                        |
| <b>mmu-miR-135a*</b>  | 25(776)                | 0,000619559              | Usp2,Stmn3,Slc37a4,Mpv17,S100a1,Lactb2,Rab3d,Amhr2,Slc46a3,Arnt,Bmp4,Gstm2,Arl2,Ppt2,Glt8d1,Os9,0610037L13Rik,Chchd6,Ptprm,Ufc1,Gpr39,Slc25a35,Igfbp2,Rabac1,Vps29                                                              |
| <b>mmu-miR-488*</b>   | 24(776)                | 0,000620167              | Sgca,Stmn3,Smpdl3a,Cyp27a1,Mrgprf,Galns,C1qtnf6,Dusp8,Nrip3,Ly6c1,Hgsnat,Mrpl55,Cyb5,Kif13b,Tex264,Serf2,Cog6,Csrp2,Cdkn1a,Cox6a2,Igfbp2,Wdr7,Ltbp3,1700094D03Rik                                                               |
| <b>mmu-miR-92b</b>    | 32(776)                | 0,000635514              | Ugp2,Sgca,Rab43,Lgr4,Nt5m,Hexa,Adamts5,Smad6,Serpib6c,Slc35a2,Dgkg,Gramd3,Anxa3,Slc31a2,Gstm2,Herpud2,Riok3,Asah1,Tmem154,Ing4,Gdap2,Mustn1,Sirt2,Klf2,Asb1,Fbn2,Dnajc4,Cdkn2b,Igfbp1,Dusp22,Atp10d,Mcl1                        |
| <b>mmu-miR-30c</b>    | 31(776)                | 0,00064235               | Ppp1r16a,Pank2,Fech,Tmem41a,Magi3,Vps39,Ank2,Vps8,Gramd3,Emp2,Ankra2,5830405N20Rik,Hoxa1,P4ha2,Ccdc80,Anxa1,Tmem175,Psen2,Vdac1,Bbs5,Ankrd29,Frmpd1,Atg12,Ahnak,Pcbd2,Fbxl20,Slc41a2,Afap1l2,Fbxw4,Wdr7,Chst12                  |
| <b>mmu-miR-380-3p</b> | 26(776)                | 0,000663506              | Oit3,Wdr47,Comm8,Alg14,Rbms2,Prss36,Dusp3,Slc7a7,Ankra2,Rab3gap2,Qpct,Nipa1,Alas1,Slc9a6,Cables1,Ing4,Frmpd1,Lrba,App,Cyb5,I117d,Chmp4c,Cdh7,Clcn7,Gas6,Pcsk6                                                                   |
| <b>mmu-miR-300*</b>   | 23(776)                | 0,000664005              | Adra1b,Adc,Mpv17,Ehd1,Ppapdc3,Atp9b,Slc35a2,Tbc1d22a,Gng5,2900010M23Rik,2010003002Rik,Arl2,Nme2,Serpib9c,Ccdc80,Psen2,Ing4,Tollip,4930523C07Rik,Cyb5,Acyp2,Acyp1,Cpeb1                                                          |
| <b>mmu-miR-708</b>    | 26(776)                | 0,000675953              | Pank2,Thra,Dtx2,Stmn3,Kif27,Tmem41a,Lamb2,Copz2,Renbp,Lmbr1,Clip1,Sepw1,Ndel1,Igfb1bp1,Wwp2,Ppt2,Lrrc57,Cdk5,9130011J15Rik,4930523C07Rik,Srr,Def8,Slc39a14,Clip4,Fbxw4,Cacna1b                                                  |
| <b>mmu-miR-295*</b>   | 21(776)                | 0,000693655              | Fech,Copg,Fem1a,Napb,Slc6a6,Nudt13,Vps8,Arnt,Mkrn1,Mlycd,Pdia5,Gabarap,Mrpl55,Spata21,Csrp2,Mras,Dhps,Slc25a35,Cdkn2b,Igfbp1,Aldh3a2                                                                                            |
| <b>mmu-miR-551b</b>   | 26(776)                | 0,000706696              | Mrc2,Plb1,Hadha,Cox4nb,Prss29,Gpx4,Cd81,Trpv4,Dhrs1,9430038I01Rik,Gstm2,Arhgef12,Dusp8,Nkiras2,Ing4,S100a16,Nol3,Plcb1,Iasca2,Klf2,Cog6,Rhoj,Yif1a,Atp10d,Aldh3a2,Ankrd44                                                       |
| <b>mmu-miR-18a*</b>   | 23(776)                | 0,000713076              | Pank2,Thra,Sgca,Elmo2,Ppp2r5b,Trappc6a,Iqsec2,Slc7a7,Clip1,Alkbh6,Bmp4,Tpcn1,Grina,Nfe2l1,Cdk5,Nupr1,Mtcp1,Mras,Igfbp1,Tmem38a,Cyb5r3,Lmna,Yif1a                                                                                |
| <b>mmu-miR-697</b>    | 28(776)                | 0,000730281              | 1300014I06Rik,Tssc4,Rpl17,Gpx4,Slc39a3,Lrrc51,Tbc1d10a,Habp4,D16H22S680E,Clstn1,Creb3,Tbcd,Akap13,Rhbdd1,Armc8,5830405N20Rik,Myo6,Repin1,Myom2,L1cam,2310046K01Rik,Mlycd,Slc22a4,Pde4dip,Ufc1,6330406I15Rik,Ltbp3,1700094D03Rik |
| <b>mmu-miR-107</b>    | 29(776)                | 0,000731742              | Tmem41a,Rab40b,Hist2h2bb,Mtmt3,Slc35a2,Armc8,Cry2,Klk1b4,1700009P17Rik,Gstm2,Arl2,Ndufa10,Ypel3,Cspg4,Lrrc57,Fabp3,Mlycd,BC089491,0610037L13Rik,Acyp2,Asb1,Ptprm,Tuba8,Cbara1,Acaa1a,Mtss1,Afap1l2,Agl,Shroom3                  |
| <b>mmu-miR-21*</b>    | 26(776)                | 0,000733255              | Pank2,Ahnak2,Dym,Arvcf,Rras,Emilin2,Neu1,Tbcd,Skap2,Txnr3,Ndufa10,Hsd3b3,Shank3,4933439F18Rik,Ppt2,Glt8d1,C330006K01Rik,Dopey2,Nol3,Ctbs,1300010F03Rik,BC029214,Ahnak,Slc25a39,Tom1l2,Tmub2                                     |
| <b>mmu-miR-28*</b>    | 23(776)                | 0,000743883              | Mrc2,Stmn3,Cat,Kif27,Comm8,Lactb2,Gpx4,Ank2,Dhrs1,Tmco3,Arnt,Hsd3b3,Stard6,Iscu,Glt8d1,Ing4,Sned1,Slc2a6,Mxra7,BC046404,Adamts4,Tmem38a,Zfp704                                                                                  |
| <b>mmu-miR-489</b>    | 28(776)                | 0,000755427              | Sh3bgr,Napb,Loxl1,Creb3,Amhr2,Adcy9,1700009P17Rik,Npy6r,Qpct,Tcn2,Ndufa10,Impdh1,Grik2,Cdk5,Deb1,Lrch1,1110003E01Rik,Trak1,Trip1,Srp14,Rab7l1,I117d,Fbxl20,Cdh7,Nhlrc1,1810030N24Rik,Tmem38a,Dusp22                             |
| <b>mmu-miR-682</b>    | 29(776)                | 0,000755913              | Dym,Tssc4,2310028O11Rik,Fbxo9,Sh3bgr,Armc8,Dhrs1,Skap2,Slc44a1,Npy6r,Arhgef12,Slc35c2,Psen2,Bbs5,Ing4,4930523C07Rik,Ctbs,2010111I01Rik,Atp6v0b,Tm9sf4,Kif13b,Asb1,Kif3a,Slc25a35,Wdr7,Limch1,Pcsk6,Cacna1b,Mtus1                |
| <b>mmu-miR-183</b>    | 30(776)                | 0,000761104              | Fech,Tssc4,Rpl17,Ascc2,Glrb,Npc2,Slc35a2,Gng5,Anxa3,Skap2,Ndufa10,Serpib9b,Htra3,Deb1,C330006K01Rik,Garnl3,Psen2,Itpr2,Nkiras2,Mustn1,Pltp,Srp14,Sstr4,Tanc2,Slc41a3,Ptdss1,Hadhb,Prepl,Hint3,Chpt1                             |
| <b>mmu-miR-540-5p</b> | 30(776)                | 0,000775872              | Ppp1r16a,Sqrdl,Adra1b,Wnt9a,Upk3b,Klf15,Iqsec2,Acx1,Synpo,Guk1,Slc9a6,Nfe2l1,Pbxip1,Wwp2,Ascc1,Nudt7,Idua,Lims2,Ppm1h,Os9,Nkiras2,Ankrd29,1810037I17Rik,Mrpl55,Asb1,Ikkg,Sh3tc2,Cyb5r3,Pcsk6,Mcl1                               |
| <b>mmu-miR-184</b>    | 28(776)                | 0,000789107              | Col14a1,Zbtb7c,Tmem41a,Wnt9a,Iqsec2,Serpib6c,Adcy9,BC027231,Slc46a3,Chrd,2700078K21Rik,Ascc1,St3gal5,Tmem175,Zfp560,Naga,Akap4,Dopey2,Ankrd29,Npdc1,BC029214,Slc39a14,Ckm,Atp6v0a1,Rabac1,Cox6b1,Uchl1,Dmpk                     |

| <i>miRNA name</i>      | <i>Number of genes</i> | <i>Corrected p-value</i> | <i>miRNA targets among genes induced in Rasless cells (from Table S1)</i>                                                                                                                                            |
|------------------------|------------------------|--------------------------|----------------------------------------------------------------------------------------------------------------------------------------------------------------------------------------------------------------------|
| <b>mmu-miR-409-3p</b>  | 28(776)                | 0,000789107              | Pank2,Ap3s1,Plb1,Hspa12a,Mpv17,Trpc7,Smpdl3a,Hdlbp,Ank2,F630110N24Rik,Vps8,Clip1,2010003O02Rik,Itega9,Stard6,L1cam,Mocs2,Pon3,Rdh12,Zfp560,Vnn1,Akap4,Sned1,Npdc1,Hadhb,Tpp1,Npc1,Shroom3                            |
| <b>mmu-miR-214*</b>    | 22(776)                | 0,00079389               | Slc37a4,Selm,Sema3b,Rhbdd1,Adcy9,BC027231,Sepw1,Repin1,Zbtb4,Bphl,Nudt7,Dusp8,Deb1,Nupr1,Nag a,Ntn4,Tbccd1,Tuba8,Gpr39,Cox6a2,Atp5e,Chst12                                                                           |
| <b>mmu-miR-488</b>     | 26(776)                | 0,0007948                | Ascc2,Zdhhc4,Insig2,Sh3bgr,Sync,Caml,Slc35a2,Clip1,Slc44a1,Riok3,Nudt7,Dusp8,Nrip3,2310046K01Rik,It pr2,Pcyt1a,A930005H10Rik,Sstr4,Cyb5,Glipr1,Fbxl20,Cpa6,Csrp2,1810046J19Rik,Cacna1b,Shroom3                       |
| <b>mmu-miR-34c*</b>    | 24(776)                | 0,000796567              | Ccdc126,Habp4,Fn1,Armc8,Myom2,Mkrn1,Qpct,Ndufa10,Lnx1,Slc9a6,Hist1h1e,Dusp8,Megf6,Deb1,Ly6c1,Trak1,Tollip,Pltp,Gpc4,Ahnak,Ypel5,Cdh7,1700021C14Rik,Dusp22                                                            |
| <b>mmu-miR-29a*</b>    | 27(776)                | 0,000799097              | Ap3s1,Lgr4,Birc7,Insig2,Cd81,Kcnn1,Vps39,1810020D17Rik,Anxa3,Camk1,Ndufa10,Bphl,Mocs2,Iscu,C330 006K01Rik,Nupr1,Vnn1,Mtcp1,2010111I01Rik,Ahnak,Slco3a1,Usp53,Nr2c1,BC046404,Cdh7,Htatip2,Sh3tc 2                     |
| <b>mmu-miR-546</b>     | 28(776)                | 0,000805365              | Zfand3,Dtx2,Hspa12a,Ascc2,Prss29,Dhrs3,Nt5m,Hexa,Rras,Krt80,Klf15,Mrgprf,Pigz,Mxra8,Sepw1,Repin1,Grina,Wisp2,Isca2,Klf2,Kif13b,6530401N04Rik,Itfg3,Acyp1,Fbxw4,Tmub2,Uchl1,Vps29                                     |
| <b>mmu-miR-685</b>     | 28(776)                | 0,000841677              | Zfand3,Hadha,Rab4b,Abcb6,Adamts5,Nudt13,Slc7a7,Skap2,Mxra8,Slc31a2,Lgals9,Grina,Ndufa10,Arhgef1 2,Ppt2,Rdh12,Vdac1,Itpr2,Slc39a14,Mrpl55,Clip4,Asb1,Hck,Trp53inp2,Ckm,Kif3a,Tom112,Chpt1                             |
| <b>mmu-miR-139-3p</b>  | 29(776)                | 0,000872385              | Zfand3,Slc37a4,Plb1,Ascc2,Mal,Emilin2,Vps8,Rarres2,Tmem87b,Sepw1,Atp2a3,Trappc2l,Myeov2,Mtap6, Wdr54,Adar,9130011J15Rik,Slc35c2,Psen2,Dopey2,Ssbbp2,Uqcrq,Htatip2,Fbn2,Adamts14,Ckm,Afap112,Ws cd2,Rabac1            |
| <b>mmu-miR-302c*</b>   | 27(776)                | 0,000878021              | Rab43,Snrpn,Slc6a7,Tmem41a,Crot,Trpc7,Napb,Stam2,Vps8,Lama2,Ap3m2,Tob1,Slc9a6,Bphl,Mocs2,Cabl es1,Deb1,Tmem154,9130011J15Rik,Ing4,Triap1,Pde4dip,Slc2a6,1810027O10Rik,Atp6v0a1,Chst12,Oplah                          |
| <b>mmu-miR-192</b>     | 27(776)                | 0,000893381              | Tssc4,Prss29,Gpx4,Fbxo9,Cistn1,Ppapdc3,Hdlbp,Atp6v1e1,Clip1,Ttc15,Hoxa1,Epb4.14b,Snta1,Lrrc57,Tme m154,Garnl3,9130011J15Rik,Atg4a,Abtb2,Ahnak,Mrpl55,Cog6,Ankrd12,Tbc1d14,Slc2a8,Npc1,Shroom3                        |
| <b>mmu-let-7f</b>      | 30(776)                | 0,000893957              | Ppp1r16a,Dtx2,Mcee,Cat,Rab4b,Alg14,Hexa,Sh3bgr,Rras,Elmo2,R74862,Cyp4v3,Akap13,Gng5,Chrd,Lnx1,S lc35b1,Riok3,Ppt2,Fabp3,Gdap2,Mtm1,Isca2,App,Ugt2b36,Zdhhc24,Ikbbg,1110034G24Rik,633040615Rik, Kif3a                 |
| <b>mmu-miR-292-5p</b>  | 31(776)                | 0,000929655              | Tssc4,Copg,Rpl17,Commd8,3830406C13Rik,Fem1a,Znrf2,Loxl1,Cd248,Crybb3,Vps8,Lhfp12,Nipa1,Tcn2,Zbt b4,L1cam,P4ha2,Gpc4,Isca2,Gabarap,Mrpl55,Fzd8,Slc1a4,Uqcrq,Dhps,Slc2a8,Lmna,Limch1,Hint3,Shroom 3,Ankrd44            |
| <b>mmu-miR-330*</b>    | 25(776)                | 0,000942361              | Fbxo9,Atp9b,Cd248,Tbcd,Sepw1,Txnrd3,Mkrn1,Trappc2l,2700078K21Rik,Anxa1,Zdhhc8,Ing4,Plcb1,Ctsb,S rp14,Atg12,Sstr4,Asb1,Ptprm,Ikbbg,Cog6,Sh3tc2,Igbbp1,Tbc1d9b,Yif1a                                                   |
| <b>mmu-miR-103</b>     | 29(776)                | 0,00095791               | Tmem41a,Elmo2,Rab40b,Znrf2,Hist2h2bb,Armc8,Klk1b4,1700009P17Rik,Calm14,Ttc15,Gstm2,Cspg4,Lrrc5 7,Cables1,Fabp3,Mlycd,Dopey2,BC089491,0610037L13Rik,Pde4dip,Acyp2,Ptprm,Tuba8,Cbara1,Acaa1a,M tss1,Agl,Dusp22,Shroom3 |
| <b>mmu-miR-327</b>     | 27(776)                | 0,000993772              | Ppp1r16a,Bri3,Ascc2,Sh3bgr,Rras,Cyp4v3,Sync,Cd248,Dgkq,Qk,Sepw1,Dok4,Tcn2,Ypel3,Gdf15,P4ha2,Adar ,Naga,Mtcp1,Klf2,Slc41a3,Nr2c1,Ptprm,Ufc1,Ckm,Igbbp1,Aldh3a2                                                        |
| <b>mmu-miR-455*</b>    | 22(776)                | 0,00109843               | S100a1,Trpc7,Gpx4,Rhbdd1,Myom2,Qpct,Herpud2,Farp2,Lnx1,Lims2,0610037L13Rik,Gabarap,Pcbd2,Tbcd d1,Asb1,Sema3f,1810027O10Rik,1110034G24Rik,Slc25a35,Ankrd12,Wdr7,Zfp704                                                |
| <b>mmu-miR-126-3p</b>  | 28(776)                | 0,00110112               | Col14a1,Ccdc126,Crot,Smad6,Ankra2,Calm14,Myom2,Nipa1,Lnx1,A430110N23Rik,Stard6,Tom1,P4ha2,Mf ap5,Lims2,Mlycd,Os9,Ing4,Mustn1,Pltp,Npdc1,Slc26a11,Cpa6,Gpr39,Tyrp1,Ankrd12,Chst12,Tubb2a                              |
| <b>mmu-miR-20b*</b>    | 25(776)                | 0,00111058               | Zfand3,Fbxo9,Nt5m,Sh3bgr,Caml,Vps8,Armc8,Zbtb4,Cspg4,Ehd3,Lrrc57,Tmem175,Bbs5,Ctsb,Atp6v0b,A9 30005H10Rik,Atp5s,Hck,Dpm2,Fbn2,Csrp2,Rabac1,Pcsk6,Vps29,Aldh3a2                                                       |
| <b>mmu-miR-699</b>     | 28(776)                | 0,00111904               | Ifi35,2310028O11Rik,Ecm1,Fbxo9,Hexa,Sh3bgr,Rras,Nudt13,Nfs1,Trappc6a,F630110N24Rik,Tpcn1,Tom1, Pbxip1,Nrip3,Rell2,Ankrd29,Atp6v0b,Acyp2,Tex264,Slc2a6,Hr,Ptprm,Ndr4,Cog6,Mras,Wscd2,Pcsk6                            |
| <b>mmu-miR-450a-3p</b> | 29(776)                | 0,00112328               | Iah1,Copg,Slc37a4,Plb1,Fbxo9,Adamts5,Caml,Atp9b,Loxl1,Creb3,Cd248,Copz2,Dab2ip,Lyrm1,Clip1,Sepw1, Apoa1bp,Shank3,P4ha2,Snta1,Adamts5,Mustn1,1300010F03Rik,Sirt2,Klf2,Sema3f,Igfbp2,Ltbp3,1700094 D03Rik              |
| <b>mmu-miR-541</b>     | 25(776)                | 0,0011507                | Pank2,Slc37a4,Birc7,Prss36,Sync,Caml,Anxa3,Arnt,5830405N20Rik,Nme2,Mlycd,Sh2d4a,Adamts2,Zfand2 b,Gabarap,Tanc2,I117d,Uqcrq,Ptprm,Hck,1810046J19Rik,Scarb2,Igfbp2,Rhoj,Zfp704                                         |
| <b>mmu-miR-15b</b>     | 30(776)                | 0,00119188               | Dym,Bri3,Tmem41a,Rab4b,Skap2,Slc46a3,Arl2,Ypel3,Shank3,C1qtnf6,Rapsn,St3gal5,Lrrc57,Glt8d1,Mlycd, Ly6c1,S100a16,Dopey2,0610037L13Rik,Srp14,Frmpd1,Zfand2b,Def8,Asb1,Slc25a39,Nr2c1,Itfg3,Cdkn1a,R abac1,Zfp704       |
| <b>mmu-miR-202-5p</b>  | 27(776)                | 0,00119199               | Rnf13,Tssc4,Bri3,Adra1b,Commd8,Pmp22,Smpdl3a,Higd1a,Aldh7a1,D16H22S680E,Ppapdc3,Neu1,Tgfb2,C opz2,Clip1,Slc44a1,Slc9a6,Ulk2,Atg7,Slc26a11,1300010F03Rik,Clip4,Tbccd1,Vps24,Fbxl20,Acaa1a,Tmub2                       |
| <b>mmu-miR-493</b>     | 27(776)                | 0,00119199               | Sqrdl,Map3k8,Atp6v0e,Abcb6,Cd248,Pld1,Mrgprf,Clip1,Bmp4,Ypel3,Pbxip1,Hist1h1e,Dusp8,Capn5,Rdh12 ,Grk4,Necap2,Clip4,Usp53,Ptdss1,Ptprm,1110034G24Rik,Fbn2,Dnajc4,1810030N24Rik,Wdr7,Zfp704                            |

| <i>miRNA name</i>      | <i>Number of genes</i> | <i>Corrected p-value</i> | <i>miRNA targets among genes induced in Rasless cells (from Table S1)</i>                                                                                                                                                    |
|------------------------|------------------------|--------------------------|------------------------------------------------------------------------------------------------------------------------------------------------------------------------------------------------------------------------------|
| <b>mmu-miR-679</b>     | 26(776)                | 0,00122364               | Ppp1r16a,Rnf13,2310028011Rik,Sgca,Plb1,Slc6a7,Pmp22,S100a1,Selm,Smpdl3a,Nt5m,Rbms2,Gpr133,Slc44a1,Rragc,Cacna1g,Rab3gap2,Herpud2,Grik2,Dopey2,Synpo2,Slc25a39,Ptprm,Sema3f,Dpm2,C1qtnf5                                      |
| <b>mmu-miR-30a</b>     | 30(776)                | 0,00124605               | Ppp1r16a,Fech,Tmem41a,Smpdl3a,Cyp4v3,Stk39,Ank2,Vps8,Gramd3,Pigz,Ankra2,5830405N20Rik,Dok4,P4ha2,Anxa1,Tmem175,Vdac1,Slc22a4,Frmpd1,1300010F03Rik,1810037117Rik,Pcbd2,Ssfa2,Fbxl20,Slc41a2,Afap1l2,Fbxw4,Cpeb1,Chst12,Dusp22 |
| <b>mmu-miR-33</b>      | 28(776)                | 0,00124837               | Dtx2,Rab43,Kif27,Lgr4,Zdhhc4,Crot,Cd81,Adamts5,Dynlrb1,Anxa3,Slc46a3,9430038I01Rik,Mapk4,Herpud2,Lnx1,Aldh6a1,Bphl,Ing4,Gpc4,Slc39a14,Acyp2,Ugt2b36,Asb1,Atp5s,Fbn2,Sh3tc2,Cbara1,Hadhb                                      |
| <b>mmu-miR-485*</b>    | 23(776)                | 0,00125185               | Adra1b,Kif27,Smpdl3a,Cyp27a1,Mtap1a,Smad6,Trpt1,Mxra8,Gstm2,L1cam,P4ha2,Deb1,Ly6c1,Ing4,Sh2d4a,Slc26a11,1300010F03Rik,Def8,Pcbd2,Rab71l1,Atp5s,Igfbp2,Atp10d                                                                 |
| <b>mmu-miR-509-5p</b>  | 29(776)                | 0,00126382               | Mrc2,Col14a1,Usp2,Mpv17,Prss29,Fbxo9,Cobl,Clstn1,Ppp2r5b,1700009P17Rik,9430038I01Rik,Pdgfc,Myeov2,2700078K21Rik,Snta1,St3gal5,Lrrc57,Rdh12,Mlycd,Ly6c1,Zmat2,Isca2,1810037117Rik,Ptprm,Ssfa2,Ufc1,1810046J19Rik,Chst12,Satb1 |
| <b>mmu-miR-302c</b>    | 29(776)                | 0,00126382               | Maob,Nt5m,Emilin2,Cyp4v3,Loxl1,Nfs1,Skap2,Ttc15,Rragc,Arl2,Rora,Nudt7,2700078E11Rik,Serpib9b,9130011J15Rik,Pxmp4,Impact,Atp6v0b,Zfand2b,Ahnak,Rab71l1,Synpo2,Atp5s,Ikbkg,Ufc1,Htatip2,Nhlrc1,Atp5e,Fbxw4                     |
| <b>mmu-miR-452</b>     | 26(776)                | 0,00126662               | Plb1,Hadha,Insig2,Rab40b,Trappc6a,Pld1,Mrgprf,Skap2,Arnt,Ttc15,Myom2,Slc9a6,Bphl,Ascc1,Mlycd,Grk4,Hgsnat,Klf2,Pcbd2,Cyb5,Tex264,Htatip2,Fbn2,Tmub2,Uchl1,Hint3                                                               |
| <b>mmu-miR-500</b>     | 27(776)                | 0,0012739                | Adra1b,Snrpn,Mpv17,Selm,Rab38,R74862,Smad6,Dusp3,1810020D17Rik,Sepw1,Galns,Grina,Ypel3,Sec22c,Deb1,Psen2,Nkiras2,Ing4,Npdc1,Dirc2,Asb1,Tex264,Arhgap1,Lynx1,Limch1,Hhip,Aldh3a2                                              |
| <b>mmu-miR-145*</b>    | 20(776)                | 0,0012962                | Fech,Maob,Mpv17,Selm,Sema3b,Creb3,Vps39,Amhr2,Lgals9,Trim36,2010003O02Rik,Ppt2,Rell2,Mtcb1,Npdc1,Zfand2b,Nr2c1,Zfp704,Dmpk,Shroom3                                                                                           |
| <b>mmu-miR-34b-3p</b>  | 28(776)                | 0,00130518               | Zfand3,Sqrdl,Ccdc126,Pef1,Dusp3,Bace1,Armc8,9430038I01Rik,Myom2,Mkrn1,Qpct,Ndufa10,Lnx1,Slc9a6,C1qtnf6,Dusp8,Deb1,Tmem175,Ly6c1,Tollip,Pltp,Gpc4,Necap2,Ypel5,6430548M08Rik,Atp6v0a1,1700021C14Rik,Dusp22                    |
| <b>mmu-miR-10a*</b>    | 23(776)                | 0,00131503               | Map3k8,Stmn3,Lgr4,Hspa12a,Atp6v0e,Hdlbp,Gramd3,Arnt,9430038I01Rik,Tmem140,Slc9a6,Mfap5,Pon3,Ly6c1,Zmat2,Pdia5,Ptprm,Cdh7,Cbara1,Fzd6,Atp6v0a1,1700094D03Rik,Immp1l                                                           |
| <b>mmu-miR-29c*</b>    | 26(776)                | 0,00132107               | Ifi35,Birc7,Tcta,Prss29,Tlr6,Higd1a,Nt5m,Hist2h2bb,Akap13,1810020D17Rik,Trpt1,Ttc15,Rora,Mtap6,Nudt7,Garnl3,Trip1,Slc39a14,4930579G22Rik,Gpr39,Nhlrc1,Slc25a35,Afap1l2,Slamf9,Camkk1,Satb1                                   |
| <b>mmu-miR-200b*</b>   | 24(776)                | 0,00132378               | Gtf2h5,Zhx1,Smpdl3a,Dscr3,D6Wsu163e,Cd248,Sgcb,Tmco3,Rab3gap2,Galns,Ascc1,Nudt7,Tmem175,Exoc3,Slc22a4,Tanc2,Rab71l1,Ill17d,Usp53,Cdkn2b,1500011K16Rik,Wdr7,Chst12,Atp10d                                                     |
| <b>mmu-miR-670</b>     | 28(776)                | 0,00132606               | Ppp1r16a,Pank2,Plb1,Fbxo9,Rab38,Ppdp3,Neu1,Ppp2r5b,D6Wsu163e,Adcy9,Klk1b4,Slc46a3,Dlg2,Rapsn,Psen2,Mlycd,Trip1,Pxmp4,Lrp4,Mrpl55,Sirt2,Mxra7,Chmp4c,Cdh7,Itfg3,Sh3tc2,Fbxw4,Atp10d                                           |
| <b>mmu-miR-469</b>     | 25(776)                | 0,00135344               | Thra,Sgca,Gpx4,Hexa,Sh3bgr,Gadd45b,Caml,Crybb3,Slc35a2,Grina,Cspg4,Impdh1,Slc35b1,Snta1,Adar,Ly6c1,Hgsnat,Zfand2b,Gabarap,4930579G22Rik,Cox6a2,Gas6,Igfbp1,281042815Rik,Shroom3                                              |
| <b>mmu-miR-467b</b>    | 32(776)                | 0,00135632               | Ahnak2,Tmem41a,Coq10a,Aldh7a1,Sh3bgr,Cd81,Trpv4,Lmbr1,Ttc15,Txnrd3,Ndel1,Farp2,Pbxip1,C1qtnf6,Nudt7,Serpib9b,Tllt7,Glt8d1,Trak1,Ntn4,Mmab,1810037117Rik,Gabarap,Rab71l1,Csrp2,Mras,Cdkn1a,Tom1l2,Stx7,Wdr7,Oplah,Uchl1       |
| <b>mmu-miR-574-3p</b>  | 29(776)                | 0,00136432               | Acp2,Iah1,Adra1b,Rab43,Cox4nb,Ascc2,Nudt13,Loxl1,Tmco3,Ephb3,Trappc2l,Shank3,Riok3,Wwp2,Nudt7,Mocs2,Pik3ip1,Vdac1,Os9,Trak1,Nol3,Sh2d4a,App,Rab71l1,Acyp1,Cog6,Cyb5r3,Dusp22,Mtus1                                           |
| <b>mmu-miR-199a-3p</b> | 28(776)                | 0,00139056               | Wdr47,2310028011Rik,Sh3bgr,Fn1,Ank2,Amhr2,Tmem87b,Qk,Stx8,Trim36,Qpct,Chrd,Nme2,Hectd3,Glt8d1,Srr,Srp14,1300010F03Rik,Def8,Acyp2,Ugt2b36,Csrp2,Tom1l2,Fbxw4,Chst12,Cox6b1,Immp1l,Aldh3a2                                     |
| <b>mmu-miR-696</b>     | 26(776)                | 0,00139515               | 1300014I06Rik,Pank2,Zfand3,2310028011Rik,Usp2,Alg14,Fn1,Lamb2,D6Wsu163e,Dusp3,Tbcd,Pld1,Armc8,Gabarap1,Slc46a3,5830405N20Rik,Pdgfc,Ccdc64,Nudt7,C330006K01Rik,Ly6c1,Slc26a11,Uchl1,1700094D03Rik,Mtus1,Chpt1                 |
| <b>mmu-miR-743b-3p</b> | 27(776)                | 0,001434                 | Iah1,Stmn3,Cat,Lgr4,Ascc2,Insig2,Sh3bgr,Abcd1,Fndc3b,5830405N20Rik,Npy6r,Fbxl2,2010003O02Rik,Qpct,Stard6,Alas1,P4ha2,Asah1,Mtcb1,Grk4,1700016M24Rik,Tanc2,Vps24,Mras,Mrps14,Cpeb1,Cox6b1                                     |
| <b>mmu-miR-758</b>     | 27(776)                | 0,001434                 | Copg,Plb1,Prss29,Cyp27a1,Wnt9a,Cyp4v3,Klf15,D6Wsu163e,Trappc6a,Tbcd,Pigz,Tob1,Ndel1,Tcn2,Slc35b1,Atg4a,Zfp560,Zmat2,Pxmp4,Srr,Tuba8,Ufc1,Fbxl20,Acaa1a,Cpeb1,Uchl1,Cacna1b                                                   |
| <b>mmu-miR-15a</b>     | 29(776)                | 0,00146331               | Dym,Bri3,Tcta,Tmem41a,Rab4b,D16H22S680E,Rab40b,Mtmr3,Gpr133,Fbxl2,2010003O02Rik,Arl2,Ypel3,Shank3,Rapsn,Nudt7,Mlycd,Ly6c1,Sned1,Dopey2,Nol3,0610037L13Rik,Srp14,Frmpd1,Pde4dip,Zfand2b,Itfg3,Ckm,Rabac1                      |
| <b>mmu-miR-362-5p</b>  | 27(776)                | 0,00148162               | Plb1,Hspa12a,Adc,Tmem41a,D16H22S680E,Cyp4v3,Prkab2,Copz2,Ndufb4,Ephb3,Mkrn1,Guk1,Ndel1,Chrd,Arhgef12,Gdf15,Psen2,Mlycd,Os9,Reep3,2010111I01Rik,2900026A02Rik,1810046J19Rik,Igfbp1,Tbc1d9b,Tmub2,Ltbp3                        |

| <i>miRNA name</i>      | <i>Number of genes</i> | <i>Corrected p-value</i> | <i>miRNA targets among genes induced in Rasless cells (from Table S1)</i>                                                                                                                                                                         |
|------------------------|------------------------|--------------------------|---------------------------------------------------------------------------------------------------------------------------------------------------------------------------------------------------------------------------------------------------|
| <b>mmu-miR-466f-3p</b> | 36(776)                | 0,00148428               | Gtf2h5,Dtx2,2310028O11Rik,Map3k8,Kif27,Mpv17,Insig2,Rab3d,Dscr3,Stam2,Smad6,Acox1,Kif1c,Tmem87b,Anxa3,Tpcn1,Gstm2,Gdf15,Slc9a6,Entpd5,2700078K21Rik,Zmat2,Trak1,Nol3,Sh2d4a,Dbp,Isca2,Ctsl,Pde4dip,Slc41a3,Ssbp2,Cdh7,Adamts14,Tubb2a,Vps29,Mtus1 |
| <b>mmu-miR-804</b>     | 24(776)                | 0,00148451               | Dym,Iah1,Rab4b,9030409G11Rik,Nt5m,Ppapdc3,Copz2,Skap2,Suox,Guk1,Cables1,Deb1,Ing4,Pxmp4,Ahnak,Atp5s,Vps24,Ufc1,Cog6,Cpeb1,Limch1,Cox6b1,Yif1a,Mtus1                                                                                               |
| <b>mmu-miR-144</b>     | 28(776)                | 0,00151353               | Ppp1r16a,Zfand3,Ugp2,Snap91,Bri3,Atp6v1e1,Anxa3,Tob1,Qpct,Lnx1,Mfap5,Htra3,Deb1,Glt8d1,Garnl3,Mlycd,Bbs5,S100a16,Abtb2,Srr,Srp14,Slco3a1,Cxcr7,Ptprm,Sh3tc2,Wdr7,Chst12,Yif1a                                                                     |
| <b>mmu-miR-878-5p</b>  | 27(776)                | 0,00153991               | Acp2,Stmn3,Slc37a4,Sh3bgr,Ppapdc3,Smad6,Cyp4v3,Nudt13,Caml,Prkab2,Dynlrb1,Ank2,Dusp3,Fstl1,Btf3l4,Skap2,Qk,Qpct,Myeov2,Man2b1,Ascc1,Dbp,Srp14,Ssfa2,Cdh7,Acyp1,Ltbp3                                                                              |
| <b>mmu-miR-26a</b>     | 28(776)                | 0,00164008               | 2310028O11Rik,Sgca,Kif27,Adc,Fbxo9,Adcy9,Qk,Rab3gap2,Tob1,Nipa1,Arhgef12,Mocs2,Hectd3,Ccdc80,Nupr1,Ntn4,5530400B01Rik,Ctsl,BC029214,Ahnak,Ugt2b36,Kif13b,Tmbim1,Ptprm,Cpa6,Gpr39,Mras,Fzd6                                                        |
| <b>mmu-miR-702</b>     | 28(776)                | 0,00170158               | Dtx2,Rab11fip5,Cd248,Kif1c,F630110N24Rik,1700009P17Rik,Clip1,Arnt,Tpcn1,Apoa1bp,Arhgef12,Rell2,Vdac1,Zmat2,Pde4dip,Tsc22d3,Slc1a4,Ikkg,Hck,Gpr39,Mras,Cdkn1a,Cox6a2,Acaa1a,Igfbp2,Gas6,Slamf9,Stxbp1                                              |
| <b>mmu-miR-222</b>     | 26(776)                | 0,00170215               | Bri3,Stmn3,Sema3b,Prss36,Trappc6a,Slc7a7,Adcy9,Pld1,Vps8,Mrgprf,Skap2,Alkbh6,Txnrd3,Ypel3,Zbtb4,L1cam,C1qtnf6,Tmem175,Ulk2,Ankrd29,Zfand2b,Ahnak,Chmp4c,4930579G22Rik,Htatip2,Uchl1                                                               |
| <b>mmu-miR-592</b>     | 24(776)                | 0,00179626               | Sqrdl,Adra1b,Ccdc126,Fahd2a,Smpd3a,Cyp27a1,Insig2,Tbcd,Akap13,Pld1,Lmbr1,Hsd3b3,Rell2,Nkiras2,4930523C07Rik,Asb1,Tmbim1,Synpo2,Tyrrp1,1810046J19Rik,Mtss1,Igfbp2,2610019F03Rik,1700094D03Rik                                                      |
| <b>mmu-miR-343</b>     | 24(776)                | 0,00179626               | Adra1b,Sgca,Kif27,Gabarapl2,Nudt13,Myom2,Ccdc64,Ypel3,Slc9a6,Cspg4,Slc35b1,Snta1,Lrrc57,Itpr2,Ing4,Nol3,BC029214,Ptprm,Mras,1810046J19Rik,Cpeb1,Lmna,Cox6b1,Mtus1                                                                                 |
| <b>mmu-miR-15a*</b>    | 23(776)                | 0,00180693               | Plb1,Tlr6,Sema3b,Lrrc51,Ehd1,Mtap1a,Abcb6,Loxl1,Tcn2,Snta1,Glt8d1,C330006K01Rik,Slc22a4,Naga,Trip1,Pdia5,Rab71,Asb1,Sema3f,Ckm,Tmub2,Chst12,Tubb2a                                                                                                |
| <b>mmu-miR-704</b>     | 25(776)                | 0,00186189               | Sgca,Cyp27a1,Abcb6,Trappc6a,Mttr3,Slc7a7,Slc46a3,Myom2,Ccdc64,Herpud2,Farp2,Slc9a6,Ulk2,Ly6c1,Dopey2,Pxmp4,Ankrd29,Def8,Zdhhc24,Itfg3,Cog6,2900026A02Rik,Scarb2,Tbc1d14,Fads3                                                                     |
| <b>mmu-miR-674*</b>    | 21(776)                | 0,00193129               | Sgca,Lrrc51,Elmo2,Nudt13,Armc8,Dhrs1,Trappc2l,Arl2,Arhgef12,Slc9a6,Tmem175,Os9,Atg7,Atp6v0b,Asb1,Nr2c1,Ptprm,Csrp2,1500011K16Rik,Mdfic,Shroom3                                                                                                    |
| <b>mmu-miR-652</b>     | 27(776)                | 0,00194924               | Zfand3,Dtx2,Usp2,Rpl17,Nt5m,Npc2,Nfs1,Ank2,Mkrn1,Rora,Cspg4,Myeov2,Ascc1,Deb1,Garnl3,Psen2,Ing4,Dopey2,Slc41a3,Hr,Mxra7,Acaa1a,Nhlrc1,Stx7,Tpp1,Cpeb1,Tbc1d9b                                                                                     |
| <b>mmu-miR-466e-5p</b> | 33(776)                | 0,00204843               | Adra1b,Cogp,Mcee,Plb1,Ecm1,Snrpn,Zdhhc4,Fbxo9,Insig2,Nt5m,Elmo2,Habp4,D16H22S680E,Sync,Akap13,Slc46a3,Calm14,Lgals9,Suox,Wisp2,Zbtb4,Man2b1,2700078K21Rik,Nrip3,Rdh12,Slc22a4,Ly6c1,Plcb1,Mtm1,Npdc1,Ill17d,Ssbp2,Tpp1                            |
| <b>mmu-miR-706</b>     | 31(776)                | 0,00207175               | Samd8,Mpv17,Fbxo9,Elmo2,Krt80,Slc16a9,Akap13,Gng5,Skap2,Camk1,Calm14,Stx8,5830405N20Rik,Trim36,Suox,Galns,Dusp8,Glt8d1,Adar,Nkiras1,Garnl3,Ing4,Reep3,Gpc4,1300010F03Rik,Ahnak,6530401N04Rik,Vamp3,Mxra7,Fzd6,Agf                                 |
| <b>mmu-miR-190b</b>    | 24(776)                | 0,00208139               | Mcee,Kif27,Lactb2,Cyp27a1,Gadd45b,Vps8,Rarres2,Gabarapl1,BC027231,Lama2,Nfe2l1,Grik2,Dopey2,Mtcbp1,Tollip,Mtm1,Glo1,Cyb5,Ugt2b36,Synpo2,Cdh7,Cox6a2,Gas6,Hint3                                                                                    |
| <b>mmu-miR-484</b>     | 27(776)                | 0,00209252               | Thra,Commd8,Pef1,Adc,Emilin2,Upk3b,Creb3,Pld1,Dgkg,Gramd3,Mapk4,Chrd,Ascc1,Slc35c2,Naga,Srp14,Sirt2,Spata21,Asb1,TeX264,Ptprm,Scarb2,Slamf9,1500011K16Rik,Rabac1,Slc2a8,Aph1a                                                                     |
| <b>mmu-miR-878-3p</b>  | 29(776)                | 0,002098                 | Cogp,Ubl4,Zhx1,Glr3,Sh3bgr,Adamts5,Upk3b,Ank2,Adcy9,Pigz,Ephb3,Tcn2,Grina,Ndufa10,Serp1b9c,Grik2,Add3,Pik3ip1,Zdhhc8,Bbs5,Tollip,Hgsnat,Srp14,Dnalcl1,Ptprm,Cdh7,Gdap1,Cdkn2b,Wscd2                                                               |
| <b>mmu-miR-382*</b>    | 22(776)                | 0,00228555               | Zfand3,Acp2,Sgca,Ecm1,Cox4nb,Ppapdc3,Nfs1,Creb3,Skap2,Ppt2,Idua,Mfap5,Pdia5,Tanc2,Cdh7,1110034G24Rik,1810046J19Rik,Kif3a,Nhlrc1,1700021C14Rik,Zfp704,Mtus1                                                                                        |
| <b>mmu-miR-654-5p</b>  | 28(776)                | 0,00238268               | Ap3s1,Sqrdl,Fbxo9,Papss2,Zhx1,Nt5m,Adamts5,Upk3b,Serp1b6c,9430038I01Rik,Slc44a1,Myom2,Lrrc57,Psen2,Bbs5,Pcyt1a,Trip1,Cryab,Sorbs3,Ill17d,Fzd8,Slc2a6,Vamp3,Ptprm,1110034G24Rik,Slamf9,Slc2a8,Tubb2a                                               |
| <b>mmu-miR-136</b>     | 24(776)                | 0,00241054               | Gtf2h5,Ecm1,Pef1,D16H22S680E,Trpv4,Nudt13,Caml,Klf15,Creb3,Cd248,Slc35b1,Tmem175,Adar,Itpr2,Serinc3,Dynl3,Vnn1,Gpc4,Nr2c1,1110034G24Rik,Htatip2,9930013L23Rik,Igfbp2,Slc2a8                                                                       |
| <b>mmu-miR-154*</b>    | 22(776)                | 0,00243845               | Crot,Cyp27a1,Vps8,Qpct,Herpud2,Lnx1,Zbtb4,Asah1,Rell2,Slc22a4,Gdap2,Dner,Sh2d4a,Pxmp4,Slc26a11,Pcb2,Acyp1,Kif3a,Ankrd12,Limch1,Vps29,Immp1l                                                                                                       |
| <b>mmu-miR-220</b>     | 31(776)                | 0,0024942                | Fech,Usp2,Ascc2,Ubl4,Fuca2,Tlr6,Insig2,Adamts5,Kif1c,Adcy9,Lyplal1,Klk1b4,Ptplad2,Sepw1,L1cam,Ascc1,Idua,Pik3ip1,Ccdc80,Galnt2,Mlycd,Def8,Abhd5,Sstr4,Tbccd1,TeX264,Tuba8,Htatip2,1810030N24Rik,Cacna1b,1700094D03Rik                             |
| <b>mmu-miR-30d</b>     | 28(776)                | 0,0025029                | Ppp1r16a,Fech,Tmem41a,Magi3,Smpd3a,Stk39,Ank2,Vps8,Fstl1,Pigz,Ankra2,5830405N20Rik,Dok4,P4ha2,Anxa1,Tmem175,Psen2,Slc22a4,Ankrd29,Frmpd1,1300010F03Rik,1810037117Rik,Pcb2,Fbxl20,Afap1l2,Fbxw4,Mrps14,Chst12                                      |



| <i>miRNA name</i>      | <i>Number of genes</i> | <i>Corrected p-value</i> | <i>miRNA targets among genes induced in Rasless cells (from Table S1)</i>                                                                                                                                     |
|------------------------|------------------------|--------------------------|---------------------------------------------------------------------------------------------------------------------------------------------------------------------------------------------------------------|
| <b>mmu-miR-582-5p</b>  | 27(776)                | 0,0025291                | Pef1,Smpdl3a,Sema3b,Nt5m,Ctbs,Cd81,Gadd45b,Rarres2,Mxra8,Dph1,Tpcn1,Pdgfc,Myeov2,Dusp8,Pik3ip1,Dopey2,Srp14,Atp6v0b,Usp53,Ssbp2,Nr2c1,Glipr1,Slc2a6,Tom1l2,Stx7,Hint3,Mtus1                                   |
| <b>mmu-miR-200c</b>    | 30(776)                | 0,00253671               | Ppp1r16a,Ugp2,Dtx2,Plb1,Crot,Atp6v0e,Krt80,Stam2,Fn1,Serpib6c,Slc35a2,Clip1,Qk,Slc44a1,Nipa1,Aldh6a1,Ppt2,Dusp8,Nrip3,Ccdc80,Tmem154,Ly6c1,Tanc2,Ssfa2,Acyp1,1810046J19Rik,Slamf9,1500011K16Rik,Tubb2a,Npc1   |
| <b>mmu-miR-684</b>     | 23(776)                | 0,00256946               | Wdr47,Adra1b,Ecm1,Samd8,Crot,Cyp27a1,Ehd1,Smad6,Creb3,Dgkg,Camk1,2010003O02Rik,Guk1,Ypel3,Slc35b1,Pxmp4,1300010F03Rik,Ptdss1,Hck,Vps24,BC046404,Dpm2,Rhoj                                                     |
| <b>mmu-miR-362-3p</b>  | 29(776)                | 0,00276426               | Maob,Adra1b,Stmn3,Rab38,Clstn1,Cyp4v3,F630110N24Rik,Tmem87b,BC027231,Arnt,Emp2,Slurp1,Ttc15,Ap3m2,Rora,P4ha2,Mlycd,Os9,Trak1,Sned1,4930523C07Rik,Slc26a11,Def8,Ahnak,Acaa1a,Igfbp2,Tmub2,1700013F07Rik,Tmem9b |
| <b>mmu-miR-290-3p</b>  | 29(776)                | 0,00276426               | Ugp2,Sgca,Plb1,Arvcf,Coq10a,Fahd2a,Fbxo9,Papss2,Hexa,Hist2h2bb,Clstn1,Ank2,Stx8,Apoa1bp,Rora,Nudt7,Ehd3,Serpib9b,Megf6,Slc22a4,Ing4,Ntn4,Vnn1,Ahnak,Ikbkg,Ufc1,Igfg3,Csrp2,Yif1a                              |
| <b>mmu-miR-295</b>     | 25(776)                | 0,00276756               | Lactb2,Coq10a,Loxl1,Stx8,Ttc15,Txnrd3,2010003O02Rik,Dlg2,Serpib9b,Glt8d1,Trip1,Mtm1,1810037117Rik,Def8,Clip4,Rab7l1,Nr2c1,Csrp2,Sh3tc2,Cdkn1a,Acaa1a,Wdr7,Uchl1,1700094D03Rik,Ankrd44                         |
| <b>mmu-miR-193b</b>    | 27(776)                | 0,00277079               | Ugp2,Tssc4,Cyp27a1,5930434B04Rik,Ppapdc3,Acox1,Tgfb2,Slc7a7,Vps8,Lmbr1,1700009P17Rik,Ttc15,Dph1,Wisp2,Snta1,Lrrc57,Pik3ip1,Tmem175,Nkiras2,BC089491,Dbp,Srp14,Ypel5,Slc25a39,Tbc1d14,1700094D03Rik,Mtus1      |
| <b>mmu-miR-350</b>     | 27(776)                | 0,00286154               | Fech,Dtx2,Adra1b,Kif27,Cox4nb,Smpdl3a,Lyplal1,Armc8,Dhrs1,Gpr133,Cacna1g,Appl2,Tcn2,Dlg2,Nudt7,Nrip3,Ttl7,Tmem154,Zfp560,S100a16,Dner,Pcyt1a,Atp6v0b,Ahnak,Cdh7,Cox6a2,Aldh3a2                                |
| <b>mmu-miR-151-3p</b>  | 24(776)                | 0,00297249               | Ppp1r16a,Ugp2,Tssc4,Col14a1,Gyg,Rab4b,Ppp2r5b,Sgcb,1700009P17Rik,Anxa3,Cacna1g,Rell2,Dopey2,At6v0b,Mrpl55,Mtss1,Gas6,Tmem38a,Tmem50b,Rabac1,Pcsk6,Tubb2a,Hint3,Zfp704                                         |
| <b>mmu-miR-421</b>     | 25(776)                | 0,00297373               | Pank2,Tmem41a,Lrrc51,Hdlbp,Akap13,Gramd3,Slc46a3,Slc31a2,Ttc15,Suox,Trappc2l,Gstk1,Stard6,Slc9a6,Lrrc57,Ly6c1,Dopey2,Atp6v0b,1700016M24Rik,Rab7l1,Cxcr7,Cyb5r3,Pcsk6,Tubb2a,Hint3                             |
| <b>mmu-miR-425*</b>    | 22(776)                | 0,00298587               | Pank2,Tssc4,Abcb6,Nudt13,Crybb3,Akap13,Clip1,Sepw1,Cacna1g,2900010M23Rik,Shank3,Impdh1,Anxa1,Adar,Garnl3,Ahnak,Chmp4c,9930013L23Rik,Slamf9,Atp10d,Aldh3a2,Shroom3                                             |
| <b>mmu-miR-672</b>     | 25(776)                | 0,00301263               | Thra,Copg,Gpx4,Insig2,Smad6,Caml,Klf15,Cd248,Copz2,Renbp,Vps8,Cry2,Qpct,Mocs2,Lrrc57,Htra3,Itp2,Ing4,Naga,Vnn1,Mustn1,Npdc1,Tex264,Atp5e,Igbbp1                                                               |
| <b>mmu-miR-501-3p</b>  | 28(776)                | 0,00330821               | Thra,Adra1b,Slc37a4,Snrpn,Selm,R74862,Smad6,Dusp3,Tbc1d22a,1810020D17Rik,Sepw1,Cacna1g,Grina,Ypel3,Shank3,L1cam,Sec22c,Deb1,Pon3,Psen2,Nkiras2,Ing4,Plcb1,Galc,Asb1,Ssbp2,Tex264,Limch1                       |
| <b>mmu-miR-719</b>     | 23(776)                | 0,00335072               | Sh3bgr,Gadd45b,Nudt13,Cd248,Trappc6a,Amhr2,Dab2ip,Tbcd,Adcy9,1700009P17Rik,Pigz,Clip1,Cacna1g,Myom2,Ndel1,Arhgef12,Ing4,Nenf,Mustn1,Zfand2b,Rabac1,Pcsk6,281042815Rik                                         |
| <b>mmu-miR-376b</b>    | 25(776)                | 0,00339053               | Pank2,Snrpn,Cox4nb,Tmem41a,BC024814,Smpdl3a,Nfs1,Akap13,Qpct,Stard6,Bphl,Ppt2,Cryab,Rab7l1,Acyp2,6530401N04Rik,Slc25a39,Ptdss1,Cdh7,Cog6,1810046J19Rik,Tom1l2,Wdr7,Atp10d,Mtus1                               |
| <b>mmu-miR-338-5p</b>  | 26(776)                | 0,00340901               | 2310028O11Rik,Maob,Mcee,Mpv17,Rab3d,Rarres2,Dgkg,Myom2,Tob1,Qpct,Lnx1,Rora,Mfap5,Tmem175,Bbs5,4930523C07Rik,Abtb2,0610037L13Rik,Srp14,Galc,Klf2,Acyp2,Il17d,6530401N04Rik,Zdhhc24,Tubb2a                      |
| <b>mmu-miR-741</b>     | 22(776)                | 0,00345527               | Alg14,Rab38,Hexa,Rras,Nfs1,Hexb,Hoxa1,Ndel1,Zbtb4,Myeov2,Ccdc80,Garnl3,Sstr4,1700016M24Rik,Klf2,Tmbim1,Atp5s,Fbxl20,Cpa6,Scarb2,Zfp704,Shroom3                                                                |
| <b>mmu-miR-142-5p</b>  | 24(776)                | 0,00345968               | Smpdl3a,Prss36,D6Wsu163e,Creb3,Camk1,Cacna1g,Herpud2,Aldh6a1,Psen2,Mtm1,Def8,Pdia5,Il17d,Dnalc1,Nr2c1,Cpa6,Mras,Nudt18,Dhps,Cox6a2,Scarb2,Igbbp1,1500011K16Rik,Ltbp3                                          |
| <b>mmu-miR-370</b>     | 26(776)                | 0,00352068               | Mrc2,Map3k8,Plb1,Ascc2,Adc,Tmem41a,Clstn1,Trappc6a,Iqsec2,Rarres2,Epb4.1l4b,Pbxip1,Ascc1,Rell2,Adamts15,Mlycd,Slc22a4,S100a13,Akap4,BC089491,Def8,Gabarap,Il17d,Ptprm,Tom1l2,Cyb5r3                           |
| <b>mmu-miR-690</b>     | 24(776)                | 0,00359127               | Zfand3,Iah1,Snap91,Cox4nb,Hexa,Smad6,Lamb2,Atp6v1e1,Copz2,Adcy9,Mkrn1,Hsd3b3,Naga,Dbp,Isca2,A930005H10Rik,Nr2c1,1810027O10Rik,Fbxl20,Htatip2,Gpr39,Igbbp1,Tbc1d14,Hint3                                       |
| <b>mmu-miR-210</b>     | 26(776)                | 0,00364517               | Usp2,Mcee,Kif27,Ascc2,Trpc7,Selm,Higd1a,Adamts5,Vps8,Armc8,Skap2,Gpr133,5830405N20Rik,2900010M23Rik,Itgb1bp1,Lnx1,Rora,Alas1,Man2b1,Grik2,Iscu,Tmem175,Gpr39,Scn1b,Hhip,1700094D03Rik                         |
| <b>mmu-miR-710</b>     | 25(776)                | 0,00376646               | Plb1,Magi3,Fahd2a,Tlr6,Rab40b,Vps39,Rarres2,Ero1l,5830405N20Rik,Ephb3,Dph1,Apoa1bp,Zbtb4,Nfe2l1,Hectd3,Os9,S100a16,Ctsb,Mtm1,Atp6v0b,Slc39a14,Vamp3,Fbn2,Slc25a35,Fads3                                       |
| <b>mmu-miR-300</b>     | 24(776)                | 0,00378623               | Ugp2,Slc37a4,Dscr3,Gadd45b,Caml,Creb3,Vps39,Adcy9,Ndufb4,Ankra2,Txnrd3,Hectd3,Ing4,Ntn4,Mtcp1,Npdc1,Tanc2,Slc25a39,BC046404,Typr1,Igbbp1,Rhoj,Mdfic,Uchl1                                                     |
| <b>mmu-miR-466b-5p</b> | 32(776)                | 0,00379443               | Adra1b,Usp2,Mcee,Plb1,Ecm1,Snrpn,Zdhhc4,Fbxo9,Insig2,Nt5m,Elmo2,Habp4,Sync,Akap13,Slc46a3,Bmp4,Calm4,Lgals9,Suox,Lnx1,Wisp2,Zbtb4,Man2b1,2700078K21Rik,Nrip3,Rdh12,Slc22a4,Ly6c1,Plcb1,Npdc1,Il17d,Ssbp2      |
| <b>mmu-miR-712*</b>    | 22(776)                | 0,00387485               | Slc6a7,Pmp22,Lgr4,Smpdl3a,Lrrc51,F630110N24Rik,Akap13,Cry2,Clip1,Arnt,Qk,Guk1,St3gal5,C330006K01Rik,Pltp,2010111I01Rik,Ahnak,Mrpl55,Klf2,Fbxl20,Gpr39,Fbxw4                                                   |

| <i>miRNA name</i>      | <i>Number of genes</i> | <i>Corrected p-value</i> | <i>miRNA targets among genes induced in Rasless cells (from Table S1)</i>                                                                                                                                     |
|------------------------|------------------------|--------------------------|---------------------------------------------------------------------------------------------------------------------------------------------------------------------------------------------------------------|
| <b>mmu-miR-138*</b>    | 21(776)                | 0,00392176               | Ppp1r16a,Stmn3,Pef1,Gyg,Inpp5a,Timp2,Rab3gap2,Stac,Arl2,Stard6,Alas1,1300010F03Rik,Vamp3,Ufc1,290026A02Rik,Igbbp1,Cyb5r3,Slc2a8,Pcsk6,Hint3,Atp10d                                                            |
| <b>mmu-miR-872*</b>    | 19(776)                | 0,00393469               | Dym,Bri3,Adc,Trpc7,Gabarapl2,Napb,Dgkg,Tmem87b,Anxa3,Lama2,Appl2,Tob1,Tom1,Tmem154,4930523C07Rik,Srp14,Ahnak,Tom1l2,Cpeb1                                                                                     |
| <b>mmu-miR-509-3p</b>  | 27(776)                | 0,0040183                | Ahnak2,Acp2,Bri3,Kremen1,Insig2,Fn1,Lama2,Cacna1g,2900010M23Rik,Pdgfc,Herpud2,Hsd3b3,Stard6,Alah6a1,Serpib9b,Garnl3,Rdh12,Ly6c1,Bbs5,Atg7,Mtcp1,Pltp,Mmab,Cyb5,Ptpm,Tmem38a,3110002H16Rik                     |
| <b>mmu-miR-483</b>     | 26(776)                | 0,00401937               | Pank2,Snap91,Smpdl3a,R74862,AI593442,Creb3,Vps39,Iqsec2,Slc35a2,Dhrs1,Camk1,Ap3m2,Myom2,Ypel3,Arhgef12,Zbtb4,Wdr54,Psen2,Plcb1,BC029214,Gstp1,Slc25a39,Mtss1,Pcsk6,Ltbp3,Cox6b1                               |
| <b>mmu-miR-431*</b>    | 22(776)                | 0,00408897               | Ppp1r16a,Ahnak2,Sqrdl,Sgca,Plb1,Hspa12a,Nudt13,Neu1,Atp6v1e1,Vps39,F630110N24Rik,Akap13,Arl2,Myeov2,Pbxip1,Deb1,1110003E01Rik,Ly6c1,Slc26a11,Cyb5,Dhps,Cacna1b                                                |
| <b>mmu-miR-338-3p</b>  | 28(776)                | 0,00426268               | Iah1,Tmem41a,Insig2,Hexa,Nudt13,Cd248,Slc35a2,1700009P17Rik,Cacna1g,Dok4,Qpct,P4ha2,Lrrc57,Mfap5,Iscu,Itp2r,Bbs5,Isca2,Tmbim1,Ssfa2,4930579G22Rik,Htatip2,Dhps,Acaa1a,1700021C14Rik,2610019F03Rik,Yif1a,Mtus1 |
| <b>mmu-miR-466a-3p</b> | 33(776)                | 0,00456545               | Adra1b,Plb1,Kif27,Mpv17,D16H22S680E,Stam2,Smad6,Sync,Klf15,Creb3,Acox1,Kif1c,Qk,Cacna1g,Npy6r,Lnx1,Asah1,Mmaa,Pon3,Zmat2,Isca2,Ctsl,Pde4dip,Slc41a3,Ssbp2,Chmp4c,Cdh7,Cog6,Nhlrc1,Stx7,Igbbp1,Mrps14,Mtus1    |
| <b>mmu-miR-495</b>     | 25(776)                | 0,00484481               | Dtx2,Adra1b,Prss29,Higd1a,Slc7a7,Fstl1,Lyplal1,Maoa,Arnt,Ankra2,Slc44a1,Ttc15,Stard6,4933439F18Rik,Vnn1,Dner,Gpc4,Tanc2,Slc25a39,Itfg3,Slamf9,1700013F07Rik,Hint3,Tmem9b,Aldh3a2                              |
| <b>mmu-miR-17*</b>     | 22(776)                | 0,00503388               | Slc37a4,Adc,Nt5m,Krt80,Caml,Armc8,Arhgef12,Zbtb4,Cspg4,Impdh1,Dusp8,Ehd3,Lrrc57,Iscu,Bbs5,Tollip,Ctsb,Pcbd2,Hck,Dpm2,1500011K16Rik,Pcsk6                                                                      |
| <b>mmu-miR-31*</b>     | 20(776)                | 0,00523736               | Iah1,Commd8,Lgr4,Mpv17,Nt5m,Glrb,Dusp3,BC027231,Ttc15,Slc9a6,P4ha2,Vdac1,Ntn4,Mustn1,Uqcrq,Sema3f,BC046404,Mras,Limch1,Oplah                                                                                  |
| <b>mmu-miR-598</b>     | 25(776)                | 0,00540245               | Sgca,Slc37a4,Cat,Crot,Sh3bgr,Ehd1,Cyp4v3,Vps39,Tgfb2,Gpr133,Fbxl2,Rora,Deb1,Dner,Sh2d4a,Lrba,Pde4dip,Zfand2b,Cyb5,6530401N04Rik,Fbn2,Csrp2,Wscd2,Zfp704,281042815Rik                                          |
| <b>mmu-miR-92a</b>     | 28(776)                | 0,0054896                | Ugp2,Sgca,Lgr4,Nt5m,Adamts5,Smad6,Serpib6c,Slc35a2,Dgkg,Gramd3,Anxa3,Herpud2,Grina,Riok3,Asah1,Tmem154,Mustn1,Mtm1,Sirt2,Klf2,Tanc2,Asb1,Fbn2,Dnajc4,Igbbp1,1700021C14Rik,Dusp22,1700094D03Rik                |
| <b>mmu-miR-491</b>     | 25(776)                | 0,00549325               | Ppp1r16a,Sh3bgr,Rras,4833439L19Rik,Nudt13,Mtmr3,Clip1,Sepw1,Man2b1,Ppt2,Ergic3,Sh2d4a,Npdc1,Cryab,Def8,Sorbs3,Glo1,Klf2,Cyb5,Tex264,Itfg3,Dnajc4,Igfbp2,Chst12,Hint3                                          |
| <b>mmu-miR-692</b>     | 20(776)                | 0,00555044               | Adc,Insig2,Smad6,Crybb3,Amhr2,Slc44a1,Trappc2l,Man2b1,Snta1,St3gal5,Tmem154,Slc22a4,Nupr1,Ing4,Ufc1,1810046J19Rik,Igfbp2,Gas6,1700094D03Rik,281042815Rik                                                      |
| <b>mmu-miR-703</b>     | 24(776)                | 0,00567033               | Dtx2,Mal,Lactb2,Gabarapl2,Adamts5,Gng5,Tob1,Man2b1,2700078K21Rik,Nudt7,Ppm1h,Garnl3,Exoc3,Atg4a,Gpc4,Srp14,Cdh7,4930579G22Rik,Mtss1,Tom1l2,Ankrd12,Satb1,Dusp22,Zfp704                                        |
| <b>mmu-miR-468</b>     | 23(776)                | 0,0056752                | Thra,Kremen1,Smpdl3a,Mtmr3,Amhr2,Armc8,Pigz,Skap2,Trappc2l,Ndel1,Nudt7,Grik2,Iscu,Lims2,Tmem154,Psen2,Hbxip,Zfp560,Vnn1,Srp14,Htatip2,Camkk1,Mtus1                                                            |
| <b>mmu-miR-720</b>     | 23(776)                | 0,00574731               | Ascc2,Adc,Ehd1,Nudt13,Ppp2r5b,D6Wsu163e,1810020D17Rik,Stac,Guk1,Arl2,Nfe2l1,Cspg4,Man2b1,Grik2,Adamts5,Ing4,BC089491,Nenf,Kif13b,Scarb2,Igbbp1,Pcsk6,Zfp704                                                   |
| <b>mmu-miR-377</b>     | 23(776)                | 0,00574731               | Gtf2h5,Thra,Gyg,Smpdl3a,Cobl,Cd81,Abcb6,Armc8,Hoxa1,Zbtb4,Nudt7,Mocs2,Tll7,Ntn4,Dner,Sh2d4a,Dbp,Tanc2,Rab7l1,Uqcrq,Tyrrp1,Wscd2,Mtus1                                                                         |
| <b>mmu-miR-367</b>     | 27(776)                | 0,00590301               | Ugp2,Gyg,Higd1a,Stk10,Stam2,Smad6,Nudt13,Upk3b,Serpib6c,Slc35a2,Dgkg,Gramd3,Cry2,Clip1,Anxa3,Herpud2,Igfb1bp1,Iscu,Lrch1,Dopey2,Ctsb,Klf2,Tex264,Ptpm,Kif3a,Dnajc4,Igbbp1                                     |
| <b>mmu-miR-497</b>     | 26(776)                | 0,0059719                | Ahnak2,Bri3,Tmem41a,Rab4b,Gpx4,Mtmr3,Gpr133,Arl2,Hsd3b3,Ypel3,Rapsn,Nudt7,St3gal5,Mlycd,Ly6c1,Sned1,0610037L13Rik,Srp14,Frmpd1,Zfand2b,Asb1,Ptpm,1110034G24Rik,Htatip2,Tmub2,Rabac1                           |
| <b>mmu-miR-135a</b>    | 26(776)                | 0,00606714               | Usp2,Plb1,Snrpn,Glrb,Adamts5,Slc7a7,Tmem87b,Ttc15,Chrd,Itga9,L1cam,Mtap6,Snta1,Glt8d1,Ing4,Pltp,4930523C07Rik,Mtm1,Npdc1,Pdia5,Cyb5,Mras,Acaa1a,Slamf9,Lrsam1,Yif1a                                           |
| <b>mmu-miR-16*</b>     | 20(776)                | 0,00622136               | Thra,Adra1b,Sgca,Sema3b,Dscr3,Caml,Anxa3,Ttc15,Repin1,Herpud2,Ndel1,Bbs5,Akap4,Abtb2,Chmp4c,Sh3tc2,Cox6a2,Ankrd12,Chst12,Oplah                                                                                |
| <b>mmu-miR-208</b>     | 23(776)                | 0,00625867               | Gnptg,Maob,Bri3,Stmn3,Snrpn,Smpdl3a,Insig2,Inpp5a,AI593442,Slc7a7,1810020D17Rik,Dhrs1,Ndel1,Itga9,Atg4a,Zfp560,App,1810037117Rik,Gdap1,Nhlrc1,Igbbp1,Satb1,Immp1l                                             |
| <b>mmu-miR-382</b>     | 23(776)                | 0,00625867               | Rab43,Plb1,Lactb2,Dhrs3,Insig2,Caml,Ppp2r5b,Ank2,Gstm2,Qpct,Gp1bb,P4ha2,Ccdc80,Anxa1,Adamts5,Bcmo1,Ssfa2,BC046404,Serf2,Slc25a35,Cdkn2b,Igbbp1,1500011K16Rik                                                  |
| <b>mmu-miR-369-5p</b>  | 25(776)                | 0,00630393               | Smpdl3a,D16H22S680E,AI593442,Cyp4v3,Tbcd,Adcy9,Lhfp12,Qk,Hexb,Slc44a1,2010003O02Rik,Gstk1,Slc9a6,Lrrc57,Add3,Garnl3,Rdh12,Gabarap,6530401N04Rik,Ptpm,Vps24,Igbbp1,Tubb2a,Cacna1b,Shroom3                      |

| <i>miRNA name</i>      | <i>Number of genes</i> | <i>Corrected p-value</i> | <i>miRNA targets among genes induced in Rasless cells (from Table S1)</i>                                                                                                                                  |
|------------------------|------------------------|--------------------------|------------------------------------------------------------------------------------------------------------------------------------------------------------------------------------------------------------|
| <b>mmu-miR-326</b>     | 24(776)                | 0,00633584               | Plb1,Pef1,Adc,Gpx4,Cd81,Smad6,Klf15,Iqsec2,Acox1,Copz2,Renbp,Slc7a7,Rarres2,Bmp4,Zbtb4,Nfe2l1,Mlycd,Ing4,Pcyt1a,Def8,Cyb5,Acaa1a,Lmna,Yif1a                                                                |
| <b>mmu-miR-450b-5p</b> | 26(776)                | 0,00642845               | Dym,Iah1,Bri3,Pmp22,Atp6v0e,Abcb6,Cyp4v3,Fbxl2,Ndel1,Lnx1,Ascc1,Asah1,Lrrc57,Htra3,Dopey2,Mtcp1,Tollip,Nol3,1300010F03Rik,BC029214,Mmab,Tuba8,Csrp2,Tom1l2,Cdkn2b,Dusp22                                   |
| <b>mmu-miR-470*</b>    | 21(776)                | 0,00650992               | Dtx2,Copg,Tmem41a,Alg14,Hexa,Habp4,Sync,Upk3b,Caml,Atp6v1e1,Ank2,Tmem87b,Galns,St3gal5,Mfap5,Ctsb,Tanc2,Nr2c1,1110034G24Rik,1700021C14Rik,Hint3                                                            |
| <b>mmu-miR-208b</b>    | 23(776)                | 0,00655983               | Gnptg,Stmn3,Commd8,Insig2,Inpp5a,AI593442,Slc7a7,1810020D17Rik,Tmem87b,Dhrs1,Anxa3,Ndel1,Atg4a,Zfp560,Serinc3,Reep3,Tm9sf4,1700016M24Rik,Gdap1,Nhlrc1,Igfbp1,Wdr7,Immp1l                                   |
| <b>mmu-miR-805</b>     | 23(776)                | 0,0066737                | Gnptg,Mcee,Rab43,Pef1,Lactb2,Rab38,R74862,Fn1,Slc35a2,Lanc1,Ndufb4,Hexb,Slc44a1,Hoxa1,Lnx1,Slc9a6,Pltp,Adamts2,Acyp2,Cpa6,2900026A02Rik,Mtss1,Afap1l2                                                      |
| <b>mmu-miR-675-3p</b>  | 22(776)                | 0,00678613               | Pank2,Rab43,Zhx1,Insig2,Sh3bgr,Atp6v0e,D16H22S680E,Kcnn1,Gng5,Ankra2,Txnrd3,2900010M23Rik,Ypel3,Pbxip1,Iscu,Adamts5,Sned1,Pltp,Atp6v0b,Htati2,Cpeb1,Wdr7                                                   |
| <b>mmu-miR-136*</b>    | 21(776)                | 0,00730721               | Maob,Bri3,Slc37a4,Cyp27a1,AI593442,D6Wsu163e,Slc44a1,Rragc,Qpct,Cables1,Deb1,BC089491,Galc,Ahnak,Klf2,Cyb5,Tbccd1,Slc25a39,Ptdss1,Csrp2,Immp1l                                                             |
| <b>mmu-miR-490</b>     | 25(776)                | 0,00770402               | Rab11fip5,D16H22S680E,Krt80,Akap13,1810020D17Rik,Dgkg,Gramd3,Alkbh6,Ttc15,Txnrd3,Fbxl2,Snta1,Ascc1,Nrip3,Ing4,Naga,Adamts2,Ptprm,Hck,Ckm,1500011K16Rik,Tmem38a,Tmem50b,Yif1a,Aldh3a2                       |
| <b>mmu-miR-193*</b>    | 22(776)                | 0,00774833               | Thra,Gnptg,Yif1b,Plb1,Ascc2,Dhrs3,Rras,Tmco3,Mocs2,Lims2,Rell2,Itpr2,Dopey2,Ahnak,Sorbs3,Sirt2,Cpa6,Sh3tc2,1810046J19Rik,Wdr7,Chst12,Rabac1                                                                |
| <b>mmu-miR-10a</b>     | 24(776)                | 0,0080649                | Ppp1r16a,Pank2,Tmem41a,Higd1a,Abcb6,Neu1,Trpt1,Gng5,Slc44a1,Repin1,Epb4.1l4b,Slc35c2,Ulk2,Mlyccd,Ly6c1,Nkiras2,Tollip,Pltp,Zfand2b,Pdia5,Kif13b,Hr,Dpm2,Scarb2                                             |
| <b>mmu-miR-204</b>     | 23(776)                | 0,00813122               | Gabarapl2,Sh3bgr,Abcb6,Lyrm1,Gramd3,Camk1,Rragc,Grina,Chrd,Snta1,Lrrc57,Serpinb9b,Ppm1h,Mtcp1,Grk4,Ahnak,Clip4,Vps24,1810027O10Rik,Slc25a35,Slc2a8,Cox6b1,Yif1a                                            |
| <b>mmu-miR-653</b>     | 22(776)                | 0,00848331               | Ppp1r16a,Dym,Cyp27a1,Lrrc51,Rab40b,Smad6,Ank2,Gng5,Btf3l4,Clip1,2010003O02Rik,Bphl,P4ha2,Zmat2,Pde6d,Pkia,Rab7l1,Glipr1,1110034G24Rik,Reck,1700013F07Rik,1700094D03Rik                                     |
| <b>mmu-miR-879*</b>    | 18(776)                | 0,00852567               | Commd8,Adc,Gpx4,Elmo2,Serpinb6c,Copz2,Ube2h,Cspg4,Ccdc80,Anxa1,Srp14,Mrpl55,1110034G24Rik,Mras,Mdfic,Zfp704,Dmpk,Yif1a                                                                                     |
| <b>mmu-miR-369-3p</b>  | 26(776)                | 0,00857471               | Gtf2h5,Rnf13,Gnptg,Mcee,Lactb2,Higd1a,Stk39,Trpv4,Slc44a1,Tpcn1,Ccdc64,Qpct,Herpud2,St3gal5,Tmem175,Ly6c1,Hscb,Mtcp1,Srp14,Lrba,Acyp2,Acyp1,Stx7,Afap1l2,Gas6,Tubb2a                                       |
| <b>mmu-miR-294*</b>    | 19(776)                | 0,00865608               | Kctd9,Kif27,Camk4,Fbxo9,Insig2,AI593442,Mttr3,Kif1c,Slc7a7,Skap2,Cdc42ep2,Plcb1,Mtm1,Mrpl55,Ssbp2,Mxra7,Vps24,Tom1l2,Mtus1                                                                                 |
| <b>mmu-miR-411*</b>    | 19(776)                | 0,00882303               | Col14a1,Stmn3,Coq10a,Sh3bgr,AI593442,Skap2,Qpct,Nudt7,Asah1,Gdap2,Sned1,Dirc2,Pcbd2,Cxcr7,Ptprm,Acyp1,Mtss1,1700021C14Rik,Rabac1                                                                           |
| <b>mmu-miR-24-2*</b>   | 22(776)                | 0,00888189               | Iah1,Hspa12a,Tcta,Elmo2,Nfs1,Dynlrb1,Slc7a7,Dok4,Apoa1bp,Trappc2l,Qpct,Epb4.1l4b,Nudt7,2700078E11Rik,Glt8d1,Atg4a,Ly6c1,Zfand2b,Hck,Serf2,Mtss1,9930013L23Rik                                              |
| <b>mmu-miR-345-3p</b>  | 23(776)                | 0,00894785               | Zfand3,Rab43,Magi3,Rbms2,Habp4,Crybb3,Btf3l4,Ptlad2,Rragc,Ndel1,Idua,Exoc3,Mustn1,Slco3a1,Spata21,Bcmo1,Ckm,Slamf9,Tbc1d9b,Pcsk6,Dusp22,1700094D03Rik,Mtus1                                                |
| <b>mmu-miR-466a-5p</b> | 31(776)                | 0,00911679               | Adra1b,Copg,Mcee,Plb1,Ecm1,Snrpn,Zdhhc4,Fbxo9,Insig2,Nt5m,Elmo2,Habp4,D16H22S680E,Sync,Akap13,Slc46a3,Bmp4,Calml4,Lgals9,Suox,Zbtb4,Man2b1,2700078K21Rik,Nrip3,Slc22a4,Ly6c1,Plcb1,Npdc1,Ill17d,Ssbp2,Tpp1 |
| <b>mmu-miR-376c</b>    | 23(776)                | 0,00939076               | Rnf13,Map3k8,Kif27,Mal,Smpdl3a,Rab38,Hexa,AI593442,Trappc6a,Akap13,Sepw1,Cacna1g,Suox,Slc9a6,Bphl,P4ha2,Rab7l1,Ugt2b36,Tom1l2,Atp6v0a1,Stxbp1,Zfp704,Immp1l                                                |
| <b>mmu-miR-410</b>     | 23(776)                | 0,00939076               | Tmem41a,Fbxo9,Dscr3,AI593442,Upk3b,Slc35a2,Fstl1,Lyplal1,Clip1,Myom2,Qpct,Pbxip1,2700078E11Rik,Ppm1h,Vnn1,Plcb1,Sh3glb1,Pcbd2,Acyp2,Slc25a39,Reck,Rit1,Mtus1                                               |
| <b>mmu-miR-212</b>     | 28(776)                | 0,00941251               | Ppp1r16a,Bri3,Lgr4,Arvcf,Vps39,Adcy9,Dgkg,Qk,Slc31a2,9430038I01Rik,Appl2,Lnx1,Tmem140,Cables1,Deb1,4930523C07Rik,Abtb2,Hgsnat,Atp6v0b,1700016M24Rik,Asb1,Tex264,Nr2c1,Hck,Ufc1,Dpm2,1810030N24Rik,Vps29    |
| <b>mmu-miR-293*</b>    | 19(776)                | 0,00944881               | Commd8,Fem1a,Hdlbp,Vps8,Btf3l4,Armc8,Skap2,Tcn2,Zbtb4,L1cam,Glt8d1,S100a16,Gpc4,Gabarap,Mrpl55,Dhps,1810030N24Rik,Slc2a8,Shroom3                                                                           |
| <b>mmu-miR-380-5p</b>  | 23(776)                | 0,00945278               | Zfand3,Bri3,Lgr4,Sh3bgr,D16H22S680E,Prss36,Akap13,Bmp4,Myeov2,P4ha2,Idua,Ergic3,Deb1,Pltp,Ctsb,Mtm1,Pcbd2,Usp53,Cpa6,Gpr39,Pcsk6,Cacna1b,Atp10d                                                            |
| <b>mmu-miR-322*</b>    | 21(776)                | 0,0094646                | Mrc2,Iah1,Plb1,Commd8,Kif3b,Fbxo9,Vps8,Pigz,Hexb,Ccdc64,Tob1,Dlg2,Slc9a6,Anxa1,Bbs5,Mtcp1,Hgsnat,Zfand2b,Pcbd2,Acyp2,Afap1l2                                                                               |
| <b>mmu-miR-340-3p</b>  | 21(776)                | 0,0094646                | Plb1,Commd8,Tmem41a,Nt5m,Hdlbp,Nudt13,Gramd3,9430038I01Rik,Sepw1,Ascc1,Tmem175,Itpr2,Os9,530400B01Rik,Dopey2,Srp14,Slc2a6,Chmp4c,Gas6,Limch1,Aldh3a2                                                       |

| <i>miRNA name</i>      | <i>Number of genes</i> | <i>Corrected p-value</i> | <i>miRNA targets among genes induced in Rasless cells (from Table S1)</i>                                                                                                                             |
|------------------------|------------------------|--------------------------|-------------------------------------------------------------------------------------------------------------------------------------------------------------------------------------------------------|
| <b>mmu-miR-19a*</b>    | 19(776)                | 0,00955994               | Ppp1r16a,Zfand3,Sqrdl,Sgca,Mcee,Smpdl3a,Fem1a,Nudt13,Tmem87b,Suox,Gdf15,Nudt7,Lrrc57,Iscu,Fabp3,Ulk2,ORF63,Cog6,Dnajc4                                                                                |
| <b>mmu-miR-434-3p</b>  | 25(776)                | 0,00973301               | Ppp1r16a,Rpl17,Snrpn,Rab38,Sh3bgr,Habp4,AI593442,Nfs1,Dusp3,1810020D17Rik,Tob1,Gp1bb,Atg4a,Mlycd,Naga,Lrba,Tm9sf4,Ahnak,Slc3a1,Gpr39,1810046J19Rik,Atp5e,Cacna1b,1700094D03Rik,Chpt1                  |
| <b>mmu-miR-191*</b>    | 20(776)                | 0,00976673               | Ahnak2,Ap3s1,Cogp,Rpl17,Hspa12a,Prss29,Tmem41a,Cyp4v3,Crybb3,Dhrs1,Cacna1g,Iscu,9130011J15Rik,Npdc1,Atp6v0b,Ptprm,Clcn7,Chst12,Slc2a8,Atp10d                                                          |
| <b>mmu-miR-455</b>     | 26(776)                | 0,0097789                | Bri3,Adra1b,Gabarapl2,Cyp4v3,Hdlbp,Nudt13,Armc8,BC027231,Myom2,Guk1,Wisp2,Zdhhc8,Ly6c1,Sned1,Nol3,Atp6v0b,Gstp1,Asb1,Tex264,Htatip2,Mras,Kif3a,Scarb2,C1qtnf1,Mcl1,2810428I15Rik                      |
| <b>mmu-miR-30e</b>     | 27(776)                | 0,0099672                | Ppp1r16a,Snrpn,Tmem41a,Cyp4v3,Trappc6a,Ank2,Vps8,Gramd3,Pigz,Ankra2,5830405N20Rik,Stac,P4ha2,Anxa1,Tmem175,Galnt2,Frmppd1,Ctsl,Atg12,Pcbd2,Ssfa2,Fbxl20,Slc41a2,Afaf112,Fbxw4,Wdr7,Chst12             |
| <b>mmu-miR-10b</b>     | 23(776)                | 0,0102089                | Ppp1r16a,Pank2,Tmem41a,Higd1a,Elmo2,Abcb6,Trpt1,Slc44a1,Ccgc64,Galns,Rora,Epb4.114b,Slc35c2,Rdh12,Adamts5,Mlycd,Ly6c1,Nkiras2,Tollip,Slc26a11,Zfand2b,Pdia5,Kif13b                                    |
| <b>mmu-miR-99b*</b>    | 21(776)                | 0,0106372                | Mrc2,Adra1b,Plb1,Gpx4,Wnt9a,Slc7a7,Gramd3,Arhgef12,Gdf15,Gp1bb,Ascc1,Nudt7,Anxa1,Adar,Ulk2,Rdh12,S100a16,Clip4,Gstp1,Scarb2,Slamf9                                                                    |
| <b>mmu-miR-203*</b>    | 19(776)                | 0,010656                 | Magi3,Trpc7,Rbms2,Nudt13,Dusp3,Rab3gap2,Arl2,Chrd,Arhgef12,Nfe2l1,Myeov2,Ascc1,Ppm1h,Adar,Mustn1,Sstr4,Mras,Dnajc4,Uchl1                                                                              |
| <b>mmu-miR-466d-3p</b> | 32(776)                | 0,0109815                | Adra1b,Plb1,Kif27,Mpv17,D16H22S680E,Stam2,Smad6,Sync,Klf15,Creb3,Kif1c,Lmbr1,Qk,Cacna1g,Npy6r,Lnx1,Pon3,Zmat2,Isca2,Ctsl,Pde4dip,Slc41a3,Ssbp2,Chmp4c,Cdh7,Acyp1,Cog6,Nhlrc1,Stx7,Igfbp1,Mrps14,Mtus1 |
| <b>mmu-miR-216a</b>    | 25(776)                | 0,0111283                | Fech,Bri3,Adra1b,Plb1,Tcta,Ubl4,Gpx4,Lrrc51,Atp6v0e,Nudt13,Caml,Tgfb2,Ptplad2,Chrd,Man2b1,Mocs2,Fabp3,1110003E01Rik,Exoc3,Sh2d4a,Srp14,Isca2,Mrpl55,9930013L23Rik,Hint3                               |
| <b>mmu-miR-181a-1*</b> | 24(776)                | 0,0117786                | Zfand3,Cat,Fbxo9,Alg14,D16H22S680E,Rassf3,Trpv4,Vps8,Skap2,Ttc15,Sepw1,Mkrn1,Lnx1,Gp1bb,Riok3,Anxa1,Adar,Exoc3,Srp14,App,Cog6,Cpeb1,Limch1,Tubb2a                                                     |
| <b>mmu-miR-101a*</b>   | 19(776)                | 0,0121683                | 2310028O11Rik,3830406C13Rik,Smpdl3a,Gabarapl2,Prss36,Alkbh6,Slc44a1,Calml4,AI317395,Farp2,Bphl,9130011J15Rik,Srp14,Pcbd2,Asb1,Ptprm,Hck,Fzd6,Tmem9b                                                   |
| <b>mmu-miR-296-3p</b>  | 27(776)                | 0,0122202                | Dtx2,Mcee,Sema3b,Trpv4,Vps8,Trpt1,Dhrs1,Gstm2,Trappc21,Galns,Ndufa10,Rapsn,Cables1,Deb1,Dopey2,Mustn1,Tm9sf4,Slc39a14,Tex264,Mxra7,BC046404,Tpp1,Fbxw4,Dmpk,Yif1a,1700094D03Rik,2810428I15Rik         |
| <b>mmu-miR-383</b>     | 25(776)                | 0,0123801                | Bri3,Ecm1,Gyg,Alg14,Emilin2,Kcnn1,Trpv4,D6Wsu163e,Acox1,Clip1,Myom2,Deb1,Gdap2,BC089491,Plcb1,Gabarap,Slc2a6,Ptprm,BC046404,Dpm2,Cpa6,Slc25a35,Wscd2,Igfbp1,Wdr7                                      |
| <b>mmu-miR-381</b>     | 22(776)                | 0,0123982                | Slc37a4,Kif27,Pef1,Sh3bgr,Krt80,Caml,Vps39,Ankra2,Gpr133,Txnrd3,Nipa1,Wisp2,Tom1,Snta1,Serpib9b,Slc6a8,Ntn4,Pxmp4,Ahnak,Tom1l2,Mdfic,Zfp704                                                           |
| <b>mmu-miR-106b*</b>   | 19(776)                | 0,0125483                | Dtx2,Ascc2,Arvcf,Rab40b,Dynlrb1,Cacna1g,Herpud2,Ndufa10,Ascc1,Mocs2,Ing4,Slc26a11,Atp6v0b,Chchd6,Slc2a6,Adamts4,Ckm,Acaa1a,Yif1a                                                                      |
| <b>mmu-miR-376a</b>    | 25(776)                | 0,0127041                | Col14a1,Tmem41a,BC024814,Insig2,Adamts5,Akap13,1110007C09Rik,Adcy9,Tob1,Qpct,Star6,Bphl,Serpib9c,Zmat2,Gabarap,Rab71l,Atp5s,Ptdss1,Nr2c1,Cdh7,Cog6,Wdr7,Uchl1,Mtus1,Shroom3                           |
| <b>mmu-miR-29b*</b>    | 23(776)                | 0,012934                 | Ahnak2,Neu1,Copz2,Gng5,Anxa3,Slc31a2,Alkbh6,Sepw1,Nme2,Bphl,Serpib9b,Deb1,BC089491,Nol3,Pde6d,Slc39a14,Mrpl55,Sirt2,Kif13b,Csrp2,1700021C14Rik,1700094D03Rik,Npc1                                     |
| <b>mmu-miR-539</b>     | 20(776)                | 0,0131228                | Fech,Adra1b,Rab43,Crot,Smpdl3a,Atp6v0e,AI593442,Caml,D6Wsu163e,Ank2,Fstl1,Gstk1,Tob1,Lnx1,Ccdc80,Adar,Fabp3,Tanc2,Cpa6,Wdr7                                                                           |
| <b>mmu-miR-33*</b>     | 17(776)                | 0,0131271                | Lgr4,Alg14,Sh3bgr,Rab40b,Creb3,1700009P17Rik,Arnt,Fbxl2,Dusp8,Lrrc57,Fabp3,Mlycd,Bbs5,Akap4,Nol3,Atp6v0b,Acyp2                                                                                        |
| <b>mmu-miR-335-3p</b>  | 19(776)                | 0,0131644                | Ecm1,Hspa12a,Insig2,Fem1a,Ank2,Sgcb,Alkbh6,Ndufa10,Itgb1bp1,Lnx1,Tmem154,Tmem175,Dopey2,BC089491,Clip4,Rab71l,Acyp2,Ugt2b36,Csrp2                                                                     |
| <b>mmu-miR-26b</b>     | 24(776)                | 0,0133617                | 2310028O11Rik,Sgca,Kif27,Commd8,Fbxo9,Insig2,Emilin2,Adcy9,Qk,Tob1,Nipa1,St3gal5,Mocs2,Hectd3,Ccdc80,Ugt2b36,Kif13b,Tmbim1,Ptprm,Ssfa2,Cpa6,Gpr39,Mras,Fzd6                                           |
| <b>mmu-miR-467a*</b>   | 18(776)                | 0,0133633                | Mcee,Plb1,Kif27,Mpv17,Glrp,Stam2,Smad6,Sync,Cacna1g,Npy6r,Slc9a6,Ccdc80,Pde4dip,Slc41a3,Ugt2b36,Ssbp2,Cdh7,Stx7                                                                                       |
| <b>mmu-miR-181b</b>    | 25(776)                | 0,0133717                | Kif27,Kremen1,Ppapdc3,Atp9b,Ank2,Lyplal1,Rragc,Cacna1g,Ephb3,Repin1,Tcn2,Zbtb4,Slc9a6,Pbxip1,Ascc1,Slc35c2,Psen2,Ly6c1,Hck,1110034G24Rik,Gpr39,Kif3a,Cpeb1,Oplah,Uchl1                                |
| <b>mmu-miR-155</b>     | 23(776)                | 0,0138653                | Bri3,Slc37a4,Prss29,Cyp4v3,Npy6r,Rora,L1cam,Mocs2,Asah1,Add3,Pik3ip1,Mlycd,Pde6d,Pkia,Ctsl,1300010F03Rik,Def8,Kif3a,Tbc1d9b,1810030N24Rik,Tubb2a,Satb1,Chpt1                                          |
| <b>mmu-miR-718</b>     | 21(776)                | 0,014187                 | Dtx2,Cox4nb,Hspa12a,Ascc2,Cobl,Prss36,Smad6,Gadd45b,Trpv4,Tpcn1,Ndufa10,Gdf15,Cdk5,Psen2,Fzd8,Slc25a39,Sema3f,Cox6a2,Gas6,Pcsk6,1700094D03Rik                                                         |

| <i>miRNA name</i>      | <i>Number of genes</i> | <i>Corrected p-value</i> | <i>miRNA targets among genes induced in Rasless cells (from Table S1)</i>                                                                                                             |
|------------------------|------------------------|--------------------------|---------------------------------------------------------------------------------------------------------------------------------------------------------------------------------------|
| <b>mmu-miR-448</b>     | 20(776)                | 0,0141887                | Kctd9,Mcee,Commd8,Adc,Fbxo9,Stam2,Ppapdc3,Klf15,Trappc6a,Ank2,Tmem87b,Ttc15,Tpcn1,Qpct,Ccdc80,Ly6c1,Slco3a1,Mtss1,Hint3,1700094D03Rik                                                 |
| <b>mmu-miR-126-5p</b>  | 21(776)                | 0,0144112                | Iah1,Adamts5,Cyp4v3,Dynlrb1,Lmbr1,Clip1,Skap2,Qk,Myom2,Qpct,Lnx1,Myeov2,Bbs5,Ill17d,Synpo2,Ssfa2,Serf2,Nhlrc1,Igfbp1,Tubb2a,3110002H16Rik                                             |
| <b>mmu-miR-451</b>     | 23(776)                | 0,0149442                | Gnptg,Ccdc126,Nt5m,Sh3bgr,Ank2,Lmbr1,Ankra2,Dok4,Appl2,Galns,Dusp8,Nrip3,Mfap5,Glt8d1,Ulk2,Npdc1,Srp14,Adamts2,Pde4dip,Gabarap,Hck,Cpa6,Mtss1                                         |
| <b>mmu-miR-325*</b>    | 18(776)                | 0,0160907                | Zfand3,Ifi35,Iah1,Copg,Commd8,Gabarapl2,Sh3bgr,Creb3,Gramd3,Ptplad2,Anxa3,Gstm2,Ly6c1,5530400B01Rik,Dirc2,1810037I17Rik,Slc41a3,Tmem9b                                                |
| <b>mmu-miR-181a</b>    | 24(776)                | 0,0161691                | Dym,Kremen1,Abcb6,Stam2,Ppapdc3,Nudt13,Atp9b,Ank2,Plid1,Lyrm1,Mkrn1,Zbtb4,Slc9a6,Pbxip1,Sec22c,Psen2,Ly6c1,Tanc2,Hck,1110034G24Rik,Gpr39,Cpeb1,Oplah,Uchl1                            |
| <b>mmu-miR-880</b>     | 21(776)                | 0,0164452                | Ppp1r16a,Tssc4,Plb1,Pef1,Ascc2,Fbxo9,Smad6,Cyp4v3,Trpv4,Cd248,Vps8,Gabarapl1,Impdh1,Itp2,Gpc4,Mrp155,Acyp2,1110034G24Rik,1810030N24Rik,Slc2a8,Aldh3a2                                 |
| <b>mmu-miR-466b-3p</b> | 29(776)                | 0,0167822                | Adra1b,Plb1,Kif27,Mpv17,D16H22S680E,Stam2,Smad6,Sync,Creb3,Acox1,Anxa3,Cacna1g,Npy6r,Lnx1,Mmaa,Pon3,Zmat2,Ctsl,Pde4dip,Slc41a3,Ssbp2,Chmp4c,Acyp1,Cog6,Nhlrc1,Stx7,Igfbp1,Mrs14,Mtus1 |
| <b>mmu-miR-127*</b>    | 17(776)                | 0,0170008                | Dtx2,Sgca,R74862,Fn1,Iqsec2,5830405N20Rik,Synpo,Zbtb4,Nfe2l1,Ccdc80,Pxmp4,Slco3a1,1110034G24Rik,Gpr39,Slamf9,Slc2a8,Oplah                                                             |
| <b>mmu-miR-22*</b>     | 20(776)                | 0,0176067                | Gtf2h5,Copg,Prss29,Rab4b,Cyp27a1,Nfs1,Vps8,Btf3l4,Tmem87b,Clip1,Hoxa1,Bphl,Mmaa,Tollip,Dbp,Cyb5,Asb1,Slc25a39,Sema3f,Hint3                                                            |
| <b>mmu-miR-27a</b>     | 23(776)                | 0,017612                 | Dym,Habp4,Fn1,A1593442,Vps39,Vps8,Skap2,Appl2,Guk1,Ypel3,Asah1,Deb1,2310046K01Rik,Akap4,Npdc1,Slc26a11,Rab7l1,Asb1,Fbxl20,Cog6,Csrp2,Mras,1700094D03Rik                               |
| <b>mmu-miR-135b</b>    | 23(776)                | 0,0178575                | Usp2,Plb1,Snrpn,Glrb,Adamts5,Tmem87b,Ttc15,Mtap6,Snta1,Glt8d1,Ing4,Pltp,4930523C07Rik,Mtm1,Npdc1,Pdia5,Csrp2,Mras,Acaa1a,Slamf9,Lrsam1,Yif1a,Vps29                                    |
| <b>mmu-miR-297b-5p</b> | 21(776)                | 0,0179939                | Mcee,Plb1,Cat,Kif27,Snrpn,Fbxo9,Insig2,Sync,Amhr2,Akap13,Armc8,5830405N20Rik,2010003O02Rik,Lnx1,Ypel3,Plcb1,Tsc22d3,Pcbd2,Ssbp2,Chmp4c,Mras                                           |
| <b>mmu-miR-186*</b>    | 18(776)                | 0,018051                 | Ahnak2,Zfand3,Stmn3,Arvcf,Cd81,Prss36,Tgfb2,Kif1c,Copz2,Slc7a7,Rel2,Lrba,Mrp155,1810046J19Rik,Fbxw4,Atp6v0a1,Tmem38a,Pcsk6                                                            |
| <b>mmu-miR-134</b>     | 22(776)                | 0,0186116                | Sqrdl,Sgca,Kremen1,Smpdl3a,Insig2,Habp4,Crybb3,Armc8,Pigz,Hsd3b3,Iscu,Hbxip,Nol3,2010111I01Rik,Mmab,Slc25a39,Ptprm,Mxra7,Ckm,Slc25a35,Cacna1b,Lrpap1                                  |
| <b>mmu-miR-582-3p</b>  | 22(776)                | 0,0188767                | 1300014I06Rik,Dym,Tmem41a,Cyp27a1,Rab40b,Atp6v1e1,Ank2,Sgcb,Clip1,2010003O02Rik,Rasl12,Ccdc64,Bphl,Slc22a4,Vnn1,Dopey2,Ctsb,Tyrrp1,Dhps,Tom1l2,1700094D03Rik,Mcl1                     |
| <b>mmu-miR-698</b>     | 21(776)                | 0,0197326                | Pank2,Thra,Bri3,Ascc2,Fem1a,Kif1c,Gng5,Gramd3,Ube2h,Gstm2,Arl2,Igta9,Lrrc57,Grik2,Mfap5,Zfand2b,Ahnak,Sorbs3,Sh3tc2,Scar2,Igfbp2                                                      |
| <b>mmu-miR-467e*</b>   | 17(776)                | 0,0199031                | Mcee,Plb1,Kif27,Glrb,Stam2,Smad6,Sync,Npy6r,Slc9a6,Ccdc80,Pon3,Pde4dip,Slc41a3,Ugt2b36,Ssbp2,Cdh7,Stx7                                                                                |
| <b>mmu-miR-127</b>     | 21(776)                | 0,0203107                | 9030409G11Rik,Slc16a9,Nudt13,Renbp,Adcy9,Tmem87b,Sepw1,Txnrd3,Mapk4,Ndel1,Epb4.1I4b,Gp1bb,Tollip,Plcb1,Spata21,Slc25a39,Cpa6,Sh3tc2,Adamts4,Tmem9b,Atp10d                             |
| <b>mmu-miR-146b</b>    | 23(776)                | 0,0211847                | Mpv17,Cyp27a1,Insig2,Vps8,Sgcb,Tmem87b,Slc44a1,Gstm2,Ccdc64,Bphl,C330006K01Rik,Garnl3,Bbs5,Gdap2,Mustn1,Ctsb,Gpc4,1300010F03Rik,Pde4dip,Tanc2,Tyrrp1,Chst12,Dusp22                    |
| <b>mmu-miR-129-5p</b>  | 22(776)                | 0,0212332                | Mcee,Plb1,Copz2,Akap13,Vps8,Lyrm1,Clip1,Anxa3,Calm14,Farp2,Lnx1,Cspg4,2700078K21Rik,Deb1,Os9,Nupr1,Mmab,Zfand2b,Ptprm,Tuba8,Cpa6,Shroom3                                              |
| <b>mmu-miR-185</b>     | 19(776)                | 0,022003                 | Fahd2a,Elmo2,Nfs1,Iqsec2,Ank2,Hsd3b3,Wisp2,L1cam,P4ha2,Garnl3,9130011J15Rik,Ing4,Gabarap,Cyb5,Asb1,Ikbkg,Chst12,Rabac1,Shroom3                                                        |
| <b>mmu-miR-496</b>     | 19(776)                | 0,022003                 | Pank2,Bri3,Smpdl3a,Nudt13,Gng5,Sgcb,Ttc15,Gstm2,Qpct,Mocs2,Bbs5,Serinc3,0610037L13Rik,Adamts2,Isc2,Zfand2b,1810037I17Rik,Rab7l1,Ndr4                                                  |
| <b>mmu-miR-181c</b>    | 24(776)                | 0,0221219                | Kremen1,D16H22S680E,Stam2,Ppapdc3,Nudt13,Ank2,Plid1,Lyplal1,Armc8,Ephb3,Mkrn1,Guk1,Slc9a6,Pbxip1,Ascc1,Nudt7,Ly6c1,Tanc2,Hck,Cdh7,1110034G24Rik,Gpr39,Reck,Aldh3a2                    |
| <b>mmu-miR-218-1*</b>  | 19(776)                | 0,0226819                | Bri3,Plb1,Cat,Fbxo9,R74862,Fn1,Dusp3,Abcd1,Stx8,Sepw1,Myeov2,Serpib9b,Ly6c1,Bbs5,4930523C07Rik,Hgsnat,Acyp2,Slc25a39,Hadhb                                                            |
| <b>mmu-miR-7a*</b>     | 19(776)                | 0,0238279                | Nt5m,Slc7a7,Anxa3,Hexb,Ttc15,Zbtb4,Gdf15,Bphl,P4ha2,Srp14,Atp6v0b,Ikbkg,Acyp1,Cdkn2b,Wdr7,Chst12,Limch1,Hint3,Chpt1                                                                   |
| <b>mmu-miR-802</b>     | 21(776)                | 0,0246305                | Snap91,Sqrdl,Kif27,Insig2,Znrf2,Cyp4v3,Nudt13,Nfs1,Atp6v1e1,Skap2,Nfe2l1,Nudt7,Ccdc80,Rdh12,Srr,Ikbkg,Chmp4c,Tyrrp1,Stx7,Wdr7,Shroom3                                                 |
| <b>mmu-miR-98</b>      | 22(776)                | 0,0248195                | Ifi35,Dtx2,Tcta,Tmem41a,Alg14,Tlr6,Habp4,Cyp4v3,Trappc6a,Gng5,Skap2,Rab3gap2,Chrd,Lnx1,Slc35b1,Riok3,St3gal5,Grik2,Fabp3,Gdap2,1110034G24Rik,Acaa1a                                   |

| <i>miRNA name</i>      | <i>Number of genes</i> | <i>Corrected p-value</i> | <i>miRNA targets among genes induced in Rasless cells (from Table S1)</i>                                                                                                  |
|------------------------|------------------------|--------------------------|----------------------------------------------------------------------------------------------------------------------------------------------------------------------------|
| <b>mmu-miR-875-5p</b>  | 23(776)                | 0,0252754                | Wdr47,Col14a1,Dhrs3,Rbms2,Klf15,D6Wsu163e,Mttr3,Ank2,Slc7a7,Alkbh6,Calm14,Ppt2,Deb1,Slc22a4,Mustn1,Gabarap,Chid1,Clip4,Ufc1,Cdh7,Ckm,Pcsk6,Aldh3a2                         |
| <b>mmu-let-7c-1*</b>   | 26(776)                | 0,0254624                | Zfand3,Kif27,Zdhhc4,Crot,Papss2,Selm,Glrb,Rab40b,Lmbr1,Ccny,Skap2,Cacna1g,Myom2,Ndel1,Ypel3,Gdf15,Rapsn,Mocs2,Iscu,Gpc4,App,Klf2,Dpm2,Cog6,Ltp3,Zfp704                     |
| <b>mmu-miR-471</b>     | 21(776)                | 0,0256027                | Adc,Lactb2,Rab3d,Gabarapl2,Glrb,Atp9b,Pld1,Ankra2,Tpcn1,Lnx1,Slc9a6,Serpinb9b,Mmaa,Glt8d1,Fabp3,Sema3c,Dner,Atp5s,Cpa6,Slc25a35,Igfbp1                                     |
| <b>mmu-miR-450b-3p</b> | 22(776)                | 0,0261501                | Thra,Iah1,Plb1,Mpv17,Ubl4,Gng5,Pigz,Sepw1,Apoa1bp,Ndel1,Farp2,Lnx1,Ascc1,Nkiras2,Srp14,Klf2,Ill17d,Glipr1,Stx7,Igfbp2,1700021C14Rik,1700094D03Rik                          |
| <b>mmu-miR-871</b>     | 20(776)                | 0,0268393                | Thra,Sqrdl,Commd8,Lgr4,Birc7,Caml,Gng5,Ttc15,Myom2,Ccdc64,Qpct,Slc9a6,Epb4.114b,Impdh1,Nrip3,Ing4,Lrba,Ill17d,Ssbp2,Scarb2                                                 |
| <b>mmu-miR-882</b>     | 19(776)                | 0,0272449                | Plb1,Kif27,Abcb6,Clstn1,Loxl1,Pigz,Txnrd3,Hsd3b3,2700078K21Rik,Adar,9130011J15Rik,Ly6c1,App,Gabara p,Ill17d,Tuba8,Sparc,Igfbp1,Chst12                                      |
| <b>mmu-miR-363</b>     | 25(776)                | 0,0274914                | Sgca,Lgr4,Kif3b,Gyg,Nt5m,Znrf2,Smad6,Serpinb6c,Dab2ip,Gramd3,Anxa3,Tob1,Herpud2,Mocs2,Iscu,Snx10,Dynlt3,4930523C07Rik,Sirt2,Klf2,Cxcr7,Dnajc4,Cdkn2b,Rabac1,Dusp22         |
| <b>mmu-miR-376c*</b>   | 17(776)                | 0,0277347                | Pmp22,Alg14,AI593442,Nfs1,1110007C09Rik,Chrd,Lnx1,P4ha2,Nudt7,Glt8d1,Pon3,Clip4,Csrp2,1810030N24Rik,Wdr7,Limch1,Ltp3                                                       |
| <b>mmu-miR-425</b>     | 23(776)                | 0,0291462                | Adra1b,Sh3bgr,Loxl1,Dynlrb1,Lyplal1,Repin1,Ndufa10,Rora,Impdh1,Cdk5,Deb1,Bbs5,Trak1,Plcb1,Mtm1,Hgsnat,Srp14,Acyp2,Acaa1a,Hadhb,Igfbp1,Camkk1,Stxbp1                        |
| <b>mmu-miR-195</b>     | 22(776)                | 0,0295098                | Bri3,Tmem41a,Rab4b,Napb,Mttr3,Fbxl2,2010003O02Rik,Arl2,Ypel3,Shank3,Rapsn,P4ha2,Nudt7,Mlycd,Srp14,Frmpd1,Zfand2b,Fbxl20,Igfbp3,Ckm,Slamf9,Rabac1                           |
| <b>mmu-miR-875-3p</b>  | 21(776)                | 0,0297991                | Tlr6,Gabarapl2,Atp6v0e,Loxl1,Lyrm1,Anxa3,Skap2,Nudt7,Asah1,Rdh12,Bbs5,Atg7,Dner,Sirt2,Tanc2,Chchd6,Ufc1,Dnajc4,Lmna,Limch1,Chpt1                                           |
| <b>mmu-miR-323-3p</b>  | 24(776)                | 0,030101                 | Commd8,Adc,Khl18,D16H225680E,Klf15,Vps8,Slc44a1,Guk1,Igfbp1,Myeov2,Ascc1,Idua,Hist1h1e,Naga,Ctsb,Lrba,Ctsl,Zdhhc24,Cdh7,Htatip2,BC004004,Mtss1,Tom1l2,Reck                 |
| <b>mmu-miR-181d</b>    | 23(776)                | 0,0305872                | Kif27,Kremen1,Mtap1a,Emilin2,Ppapdc3,Atp9b,Ank2,Lyplal1,Rragc,Repin1,Zbtb4,Slc9a6,Pbxip1,Slc35c2,Psens2,Ly6c1,Hck,1110034G24Rik,Gpr39,Kif3a,Cpeb1,Oplah,Uchl1              |
| <b>mmu-miR-32</b>      | 24(776)                | 0,0308078                | Ugp2,Gyg,Tcta,Nt5m,Adamts5,AI593442,Smad6,Trappc6a,Serpinb6c,Slc35a2,Dgkg,Gramd3,Anxa3,Ankra2,Tob1,Herpud2,Dynlt3,Klf2,Hck,Dpm2,Kif3a,Dnajc4,Igfbp1,Dusp22                 |
| <b>mmu-miR-678</b>     | 22(776)                | 0,0323097                | Pank2,Copg,Hadha,Pef1,Nt5m,Gadd45b,Atp9b,Slc35a2,Myo6,Ephb3,Ndel1,Hbxip,Mttr3,Nol3,Sorbs3,Asb1,Slc25a39,Dpm2,Htatip2,Mras,Rabac1,Nagk                                      |
| <b>mmu-miR-291a-5p</b> | 24(776)                | 0,0328236                | Map3k8,Bri3,Adra1b,Ascc2,Prss29,Tlr6,Trpv4,Cd248,Tgfb2,Mrgprf,Clip1,Ttc15,Stard6,Nfe2l1,Ehd3,Anxa1,Dynlt3,Mrpl55,Cdh7,Cpa6,Ckm,Rabac1,Zfp704,Mtus1                         |
| <b>mmu-miR-154</b>     | 19(776)                | 0,0333326                | Acp2,Ugp2,Tmem41a,Trpc7,Lrrc51,Stam2,Nudt13,Mttr3,Slc35a2,1810020D17Rik,Lmbr1,Tcn2,Hsd3b3,C1qtnf6,Mocs2,Atg7,Sned1,Tollip,Ufc1                                             |
| <b>mmu-miR-543</b>     | 21(776)                | 0,0340433                | Maob,D16H225680E,Fn1,Ppapdc3,Sync,Nfs1,Bace1,Slc7a7,Tbc1d22a,Lyplal1,Repin1,Myom2,Lrrc57,Grik2,Nenf,Klf2,Cpa6,Gpr39,Sh3tc2,Slc2a8,Lmna                                     |
| <b>mmu-miR-463</b>     | 21(776)                | 0,0349692                | Snrpn,Lgr4,Kremen1,Rbms2,Inpp5a,Cyp4v3,1110007C09Rik,Skap2,Gstm2,Ypel3,Myeov2,Idua,Anxa1,Fabp3,Psens2,Adamts15,Reep3,S100a16,Csrp2,Adamts14,Uchl1                          |
| <b>mmu-let-7e</b>      | 24(776)                | 0,0366643                | Ppp1r16a,Mcee,Rras,Elmo2,R74862,Cyp4v3,Trappc6a,Akap13,Gng5,Skap2,Trappc2l,Igfbp1,Ppt2,St3gal5,Fabp3,Gdap2,Tollip,Mtm1,Iscs2,264,Zdhhc24,1110034G24Rik,1810046J19Rik,Wscd2 |
| <b>mmu-miR-503*</b>    | 15(776)                | 0,0411302                | Ugp2,Sgca,Kif27,Sema3b,Slc7a7,Sgcb,Ttc15,Qpct,Herpud2,Zbtb4,Mfap5,Bbs5,Lrba,Tyrrp1,Acaa1a                                                                                  |
| <b>mmu-miR-669a</b>    | 21(776)                | 0,0411516                | Ahnak2,Zfand3,Copg,Mcee,Insig2,Higd1a,Adamts5,Fstl1,Bmp4,Rapsn,Rdh12,Ly6c1,Trip1,Ahnak,Sorbs3,Acp2,Cpa6,Mras,Gas6,Zfp704,Vps29                                             |
| <b>mmu-miR-511</b>     | 19(776)                | 0,0413243                | Bri3,Sgca,Gpx4,Elmo2,Sync,Myom2,Fbxl2,Ccdc64,Cspg4,Ccdc80,Ing4,Tollip,Pde6d,App,Mrpl55,1810027O10Rik,Cdh7,Cpa6,1810046J19Rik                                               |
| <b>mmu-miR-340-5p</b>  | 19(776)                | 0,0429193                | Thra,AI593442,Hdlbp,F630110N24Rik,Gng5,Skap2,9430038I01Rik,Myo6,Hsd3b3,Alas1,Rapsn,Ly6c1,Trip1,Slc41a3,Ill17d,Ugt2b36,Ssbp2,Nr2c1,Scarb2                                   |
| <b>mmu-miR-376b*</b>   | 16(776)                | 0,0429636                | Commd8,Pmp22,Ascc2,AI593442,Nfs1,Akap13,1110007C09Rik,Gng5,Chrd,Nudt7,Glt8d1,Pon3,Clip4,Rab7l1,Wdr7,Ltp3                                                                   |
| <b>mmu-miR-197</b>     | 20(776)                | 0,0429656                | 1300014I06Rik,Adamts5,Dynlrb1,Pld1,Trpt1,Gramd3,Gpr133,Chrd,Man2b1,St3gal5,Pik3ip1,Ulk2,Hbxip,Lrp4,Vamp3,Gpr39,Scn1b,Cpeb1,1700021C14Rik,Ankrd44                           |
| <b>mmu-miR-379</b>     | 21(776)                | 0,0442156                | Ap3s1,Dtx2,Maob,Ecm1,Hadha,Hist2h2bb,Cyp4v3,Ppp2r5b,Dgkg,Tmem87b,Idua,Mtm1,Frmpd1,Gabarap,Nr2c1,Slc2a6,Cpa6,Gpr39,9930013L23Rik,Cyb5r3,Tubb2a                              |

| <i>miRNA name</i>    | <i>Number of genes</i> | <i>Corrected p-value</i> | <i>miRNA targets among genes induced in Rasless cells (from Table S1)</i>                                                                                   |
|----------------------|------------------------|--------------------------|-------------------------------------------------------------------------------------------------------------------------------------------------------------|
| <b>mmu-miR-24-1*</b> | 19(776)                | 0,0452867                | Hspa12a,Ctbs,Nfs1,Dynlrb1,Vps8,Skap2,Apoa1bp,Nudt7,2700078E11Rik,Glt8d1,Tmem175,Ly6c1,Npd1,Zfand2b,Serf2,1110034G24Rik,Csrp2,Mtss1,9930013L23Rik            |
| <b>mmu-miR-193</b>   | 21(776)                | 0,045849                 | Slc6a7,Mpv17,Cyp27a1,Slc7a7,Vps8,Lmbr1,1700009P17Rik,Slc31a2,Ttc15,Wisp2,Snta1,Lrrc57,Pik3ip1,Tmem175,Nkiras2,Dbp,Srp14,Daglb,Tbc1d14,Tbc1d9b,1700094D03Rik |
| <b>mmu-miR-186</b>   | 19(776)                | 0,0484185                | Plb1,Rpl17,Hspa12a,Smad6,Cd248,Ank2,5830405N20Rik,Qpct,Chrd,Sec22c,Mfap5,C330006K01Rik,Serinc3,Ntn4,Ankrd29,1300010F03Rik,Clip4,Csrp2,Aph1a                 |
| <b>mmu-miR-146a</b>  | 22(776)                | 0,0487916                | Wdr47,Mpv17,Cyp27a1,Insig2,Adcy9,Vps8,Sgcb,Tmem87b,Tmco3,Gstm2,Bphl,Mocs2,Garnl3,Bbs5,Gdap2,Ctsb,Gpc4,1300010F03Rik,Pde4dip,Tanc2,Tyrp1,Dusp22              |
| <b>mmu-miR-694</b>   | 16(776)                | 0,0497103                | Hexa,Atp6v0e,Anxa3,Ankra2,Nudt7,Mfap5,Deb1,9130011J15Rik,Bbs5,Tanc2,Chchd6,Rab711,Cpa6,Cox6a2,Dnajc4,Chpt1                                                  |
