# Supplementary material for: Reversible, interrelated mRNA and miRNA expression patterns in the transcriptome of Rasless fibroblasts: functional and mechanistic implications
Source: PubMed Central journal article supplement (PMC4007593; doi:10.1186/1471-2164-14-731), 2013-10-25
Supplement: 1471-2164-14-731-S4.pdf [file 1471-2164-14-731-S4.pdf]

**Table S4. Differentially expressed genes of Rasless cells showing reversed, opposite transcriptional pattern in both BRAF- or MEK1-rescued MEFs (FDR=0.01)**

List of 93 induced (red color) and 339 repressed (green color) genes of the transcriptome of Rasless cells (identified by SAM comparison between Control and Rasless cells, FDR=0.01) that are concurrently and respectively listed as repressed and induced loci in the transcriptional profiles of both BRAF-rescued and MEK1-rescued MEFs (generated by SAM comparison of Rasless cells with BRAF-rescued or MEK1-rescued MEFs at same FDR=0.01. Loci are identified by Affymetrix *Probeset ID*, *Gene Name* and *Symbol*, and listed according to degree of overexpression or repression, quantified by *d-value*.

*d-value* is a parameter measuring the statistical distance separating the calculated expression value of each gene probe set from the null hypothesis (no-change). *q-value* is the estimated FDR at the largest *p-value* for which the probeset would be statistically significant. *R-fold* is a measure of the fold change of a probeset in the collection of microarrays provided by the SAM algorithm. Red colored data denotes overexpression, whereas green color denotes transcriptional repression in Rasless MEFs.

| <i>Probeset ID</i> | <i>Symbol</i> | <i>Gene Name</i>                                                  | <i>d-value</i> | <i>q-value</i> | <i>R-fold</i> |
|--------------------|---------------|-------------------------------------------------------------------|----------------|----------------|---------------|
| 1436978_at         | Wnt9a         | wingless-type MMTV integration site 9A                            | 14.33          | 0.00           | 4.05          |
| 1438266_at         | Adamts15      | ADAMTS-like 5                                                     | 14.25          | 0.00           | 4.88          |
| 1420336_at         | Adamts15      | ADAMTS-like 5                                                     | 6.33           | 0.00           | 2.55          |
| 1449082_at         | Mfap5         | microfibrillar associated protein 5                               | 12.54          | 0.00           | 15.90         |
| 1418454_at         | Mfap5         | microfibrillar associated protein 5                               | 9.76           | 0.00           | 21.53         |
| 1432558_a_at       | Mal           | myelin and lymphocyte protein. T-cell differentiation protein     | 10.89          | 0.00           | 3.66          |
| 1417275_at         | Mal           | myelin and lymphocyte protein. T-cell differentiation protein     | 10.14          | 0.00           | 21.04         |
| 1450512_at         | Ntn4          | netrin 4                                                          | 9.90           | 0.00           | 4.04          |
| 1424057_at         | Gdap2         | ganglioside-induced differentiation-associated-protein 2          | 9.48           | 0.00           | 1.50          |
| 1422347_at         | Npy6r         | neuropeptide Y receptor Y6                                        | 9.25           | 0.00           | 9.01          |
| 1438086_at         | Npy6r         | neuropeptide Y receptor Y6                                        | 8.77           | 0.00           | 17.26         |
| 1417604_at         | Camk1         | calcium/calmodulin-dependent protein kinase I                     | 9.05           | 0.00           | 2.66          |
| 1417605_s_at       | Camk1         | calcium/calmodulin-dependent protein kinase I                     | 7.32           | 0.00           | 2.66          |
| 1432158_a_at       | Trappc2       | trafficking protein particle complex 2                            | 8.81           | 0.00           | 1.75          |
| 1417105_at         | Trappc2l      | trafficking protein particle complex 2-like                       | 5.26           | 0.00           | 1.66          |
| 1433916_at         | Vamp3         | vesicle-associated membrane protein 3                             | 8.74           | 0.00           | 1.44          |
| 1456245_x_at       | Vamp3         | vesicle-associated membrane protein 3                             | 6.80           | 0.00           | 1.45          |
| 1433693_x_at       | Vamp3         | vesicle-associated membrane protein 3                             | 5.68           | 0.00           | 1.31          |
| 1436865_at         | Slc26a11      | solute carrier family 26. member 11                               | 8.66           | 0.00           | 1.44          |
| 1424762_at         | C1qtnf5       | C1q and tumor necrosis factor related protein 5                   | 8.57           | 0.00           | 2.30          |
| 1422157_a_at       | Itgb1bp1      | integrin beta 1 binding protein 1                                 | 8.31           | 0.00           | 1.69          |
| 1434558_at         | Wdr47         | WD repeat domain 47                                               | 8.13           | 0.00           | 1.79          |
| 1450409_a_at       | 4930570C03Rik | RIKEN cDNA 4930570C03 gene                                        | 8.08           | 0.00           | 2.53          |
| 1450410_a_at       | 4930570C03Rik | RIKEN cDNA 4930570C03 gene                                        | 6.82           | 0.00           | 2.25          |
| 1422596_at         | Nkain4        | Na <sup>+</sup> /K <sup>+</sup> transporting ATPase interacting 4 | 8.07           | 0.00           | 11.90         |
| 1419979_s_at       | Creb3         | cAMP responsive element binding protein 3                         | 7.86           | 0.00           | 1.98          |
| 1424741_s_at       | Creb3         | cAMP responsive element binding protein 3                         | 4.70           | 0.01           | 1.90          |
| 1418089_at         | Stx8          | syntaxin 8                                                        | 7.78           | 0.00           | 1.55          |
| 1418088_a_at       | Stx8          | syntaxin 8                                                        | 5.72           | 0.00           | 1.54          |
| 1438550_x_at       | Srr           | serine racemase                                                   | 7.67           | 0.00           | 1.54          |
| 1438549_a_at       | Srr           | serine racemase                                                   | 6.24           | 0.00           | 1.72          |
| 1455045_at         | Srr           | serine racemase                                                   | 6.17           | 0.00           | 2.18          |

| <i>Probeset ID</i> | <i>Symbol</i> | <i>Gene Name</i>                                              | <i>d-value</i> | <i>q-value</i> | <i>R-fold</i> |
|--------------------|---------------|---------------------------------------------------------------|----------------|----------------|---------------|
| 1419664_at         | Srr           | serine racemase                                               | 5.88           | 0.00           | 2.30          |
| 1435446_a_at       | Chpt1         | choline phosphotransferase 1                                  | 7.66           | 0.00           | 1.66          |
| 1430539_at         | Mxra7         | matrix-remodelling associated 7                               | 7.61           | 0.00           | 2.13          |
| 1440975_at         | Mxra7         | matrix-remodelling associated 7                               | 5.82           | 0.00           | 2.48          |
| 1453855_at         | Mxra7         | matrix-remodelling associated 7                               | 5.01           | 0.00           | 1.92          |
| 1443502_at         | Birc7         | baculoviral IAP repeat-containing 7 (livin)                   | 7.51           | 0.00           | 1.66          |
| 1417565_at         | Abhd5         | abhydrolase domain containing 5                               | 7.45           | 0.00           | 2.22          |
| 1417566_at         | Abhd5         | abhydrolase domain containing 5                               | 5.66           | 0.00           | 1.93          |
| 1439794_at         | NA            | NA                                                            | 7.40           | 0.00           | 9.45          |
| 1419668_at         | Sgcb          | sarcoglycan. beta (dystrophin-associated glycoprotein)        | 7.39           | 0.00           | 2.15          |
| 1436678_at         | Sgcb          | sarcoglycan. beta (dystrophin-associated glycoprotein)        | 6.12           | 0.00           | 2.50          |
| 1419667_at         | Sgcb          | sarcoglycan. beta (dystrophin-associated glycoprotein)        | 5.73           | 0.00           | 1.66          |
| 1452646_at         | Trp53inp2     | transformation related protein 53 inducible nuclear protein 2 | 7.34           | 0.00           | 1.93          |
| 1419015_at         | Wisp2         | WNT1 inducible signaling pathway protein 2                    | 7.25           | 0.00           | 26.74         |
| 1419315_at         | Slamf9        | SLAM family member 9                                          | 7.24           | 0.00           | 1.92          |
| 1452879_at         | Synpo2        | synaptopodin 2                                                | 7.23           | 0.00           | 2.57          |
| 1450828_at         | Synpo2        | synaptopodin 2                                                | 5.33           | 0.00           | 1.52          |
| 1441206_at         | Synpo2        | synaptopodin 2                                                | 4.32           | 0.01           | 1.72          |
| 1439409_x_at       | Tyrp1         | tyrosinase-related protein 1                                  | 7.16           | 0.00           | 1.42          |
| 1417384_at         | Entpd5        | ectonucleoside triphosphate diphosphohydrolase 5              | 7.15           | 0.00           | 2.36          |
| 1433763_at         | Entpd5        | ectonucleoside triphosphate diphosphohydrolase 5              | 5.51           | 0.00           | 1.60          |
| 1417383_at         | Entpd5        | ectonucleoside triphosphate diphosphohydrolase 5              | 5.14           | 0.00           | 1.45          |
| 1417382_at         | Entpd5        | ectonucleoside triphosphate diphosphohydrolase 5              | 4.48           | 0.01           | 1.45          |
| 1420540_a_at       | Rit1          | Ras-like without CAAX 1                                       | 7.14           | 0.00           | 1.68          |
| 1428710_at         | Rit1          | Ras-like without CAAX 1                                       | 4.64           | 0.01           | 1.61          |
| 1424408_at         | Lims2         | LIM and senescent cell antigen like domains 2                 | 7.07           | 0.00           | 2.12          |
| 1438011_at         | Pcyt1a        | phosphate cytidyltransferase 1. choline. alpha isoform        | 7.00           | 0.00           | 1.65          |
| 1421957_a_at       | Pcyt1a        | phosphate cytidyltransferase 1. choline. alpha isoform        | 4.49           | 0.01           | 1.58          |
| 1428891_at         | 9130213B05Rik | RIKEN cDNA 9130213B05 gene                                    | 6.96           | 0.00           | 4.97          |
| 1424214_at         | 9130213B05Rik | RIKEN cDNA 9130213B05 gene                                    | 6.34           | 0.00           | 4.98          |
| 1449331_a_at       | Rapsn         | receptor-associated protein of the synapse                    | 6.90           | 0.00           | 1.93          |
| 1416408_at         | Acox1         | acyl-Coenzyme A oxidase 1. palmitoyl                          | 6.81           | 0.00           | 1.93          |
| 1416409_at         | Acox1         | acyl-Coenzyme A oxidase 1. palmitoyl                          | 4.99           | 0.00           | 1.77          |
| 1448233_at         | Prnp          | prion protein                                                 | 6.80           | 0.00           | 2.46          |
| 1416130_at         | Prnp          | prion protein                                                 | 5.91           | 0.00           | 3.46          |
| 1417527_at         | Ap3m2         | adaptor-related protein complex 3. mu 2 subunit               | 6.77           | 0.00           | 2.03          |
| 1448751_at         | Ap3m2         | adaptor-related protein complex 3. mu 2 subunit               | 4.69           | 0.01           | 1.89          |
| 1447845_s_at       | Vnn1          | vanin 1                                                       | 6.76           | 0.00           | 21.50         |
| 1418486_at         | Vnn1          | vanin 1                                                       | 6.53           | 0.00           | 23.38         |
| 1423205_at         | Tm9sf4        | transmembrane 9 superfamily protein member 4                  | 6.70           | 0.00           | 1.38          |
| 1423204_at         | Tm9sf4        | transmembrane 9 superfamily protein member 4                  | 4.35           | 0.01           | 1.24          |
| 1435874_at         | Prkab2        | protein kinase. AMP-activated. beta 2 non-catalytic subunit   | 6.48           | 0.00           | 1.73          |
| 1435875_at         | Prkab2        | protein kinase. AMP-activated. beta 2 non-catalytic subunit   | 6.39           | 0.00           | 1.65          |
| 1423376_a_at       | Dok4          | docking protein 4                                             | 6.48           | 0.00           | 1.78          |
| 1418436_at         | Stx7          | syntaxin 7                                                    | 6.43           | 0.00           | 1.36          |
| 1426801_at         | 08-sep        | septin 8                                                      | 6.42           | 0.00           | 2.05          |
| 1455594_at         | Exoc3         | exocyst complex component 3                                   | 6.28           | 0.00           | 2.06          |
| 1420772_a_at       | Tsc22d3       | TSC22 domain family. member 3                                 | 6.11           | 0.00           | 3.80          |
| 1425557_x_at       | Tsc22d3       | TSC22 domain family. member 3                                 | 5.38           | 0.00           | 1.49          |

| <i>Probeset ID</i> | <i>Symbol</i> | <i>Gene Name</i>                                                          | <i>d-value</i> | <i>q-value</i> | <i>R-fold</i> |
|--------------------|---------------|---------------------------------------------------------------------------|----------------|----------------|---------------|
| 1425281_a_at       | Tsc22d3       | TSC22 domain family. member 3                                             | 5.19           | 0.00           | 3.24          |
| 1451362_at         | Rab7l1        | RAB7. member RAS oncogene family-like 1                                   | 6.04           | 0.00           | 1.88          |
| 1421088_at         | Gpc4          | glypican 4                                                                | 6.01           | 0.00           | 1.76          |
| 1436514_at         | Gpc4          | glypican 4                                                                | 4.94           | 0.00           | 1.70          |
| 1449263_at         | Ufm1          | ubiquitin-fold modifier 1                                                 | 5.87           | 0.00           | 1.82          |
| 1418899_at         | Ufm1          | ubiquitin-fold modifier 1                                                 | 4.47           | 0.01           | 1.36          |
| 1449455_at         | Hck           | hemopoietic cell kinase                                                   | 5.86           | 0.00           | 2.67          |
| 1424726_at         | Tmem150       | transmembrane protein 150                                                 | 5.83           | 0.00           | 1.88          |
| 1455781_at         | BC027231      | cDNA sequence BC027231                                                    | 5.77           | 0.00           | 2.31          |
| 1435009_at         | Slc9a6        | solute carrier family 9 (sodium/hydrogen exchanger). member 6             | 5.58           | 0.00           | 1.61          |
| 1435008_at         | Slc9a6        | solute carrier family 9 (sodium/hydrogen exchanger). member 6             | 4.77           | 0.01           | 1.43          |
| 1453573_at         | Hist2h3c1     | histone cluster 2. H3c1                                                   | 5.53           | 0.00           | 2.13          |
| 1442051_at         | Hist2h3c1     | histone cluster 2. H3c1                                                   | 4.41           | 0.01           | 5.78          |
| 1434537_at         | Slco3a1       | solute carrier organic anion transporter family. member 3a1               | 5.53           | 0.00           | 2.45          |
| 1449929_at         | Dynlt3        | dynein light chain Tctex-type 3                                           | 5.53           | 0.00           | 1.65          |
| 1420614_at         | Dynlt3        | dynein light chain Tctex-type 3                                           | 4.76           | 0.01           | 1.82          |
| 1448867_at         | Tmem9b        | TMEM9 domain family. member B                                             | 5.52           | 0.00           | 1.59          |
| 1437149_at         | Slc6a6        | solute carrier family 6 (neurotransmitter transporter. taurine). member 6 | 5.51           | 0.00           | 1.81          |
| 1449751_at         | Slc6a6        | solute carrier family 6 (neurotransmitter transporter. taurine). member 6 | 4.98           | 0.00           | 1.62          |
| 1422118_at         | Sync          | syncoilin                                                                 | 5.46           | 0.00           | 1.98          |
| 1434548_at         | Serinc3       | serine incorporator 3                                                     | 5.39           | 0.00           | 1.94          |
| 1425068_a_at       | Tex264        | testis expressed gene 264                                                 | 5.36           | 0.00           | 2.09          |
| 1422654_at         | Sgca          | sarcoglycan. alpha (dystrophin-associated glycoprotein)                   | 5.36           | 0.00           | 1.64          |
| 1445565_at         | Hist1h1e      | histone cluster 1. H1e                                                    | 5.32           | 0.00           | 1.73          |
| 1440330_at         | Hist1h1e      | histone cluster 1. H1e                                                    | 4.40           | 0.01           | 1.43          |
| 1452667_at         | Rab2b         | RAB2B. member RAS oncogene family                                         | 5.27           | 0.00           | 1.98          |
| 1428115_a_at       | Rab2b         | RAB2B. member RAS oncogene family                                         | 5.10           | 0.00           | 2.01          |
| 1452668_x_at       | Rab2b         | RAB2B. member RAS oncogene family                                         | 5.10           | 0.00           | 1.96          |
| 1434354_at         | Maob          | monoamine oxidase B                                                       | 5.26           | 0.00           | 3.76          |
| 1424411_at         | Tmem189       | transmembrane protein 189                                                 | 5.25           | 0.00           | 1.74          |
| 1428067_at         | Rasl12        | RAS-like. family 12                                                       | 5.25           | 0.00           | 3.12          |
| 1431167_at         | Dgkg          | diacylglycerol kinase. gamma                                              | 5.23           | 0.00           | 2.09          |
| 1428014_at         | Hist1h4h      | histone cluster 1. H4h                                                    | 5.21           | 0.00           | 3.59          |
| 1435714_x_at       | Il17d         | interleukin 17D                                                           | 5.18           | 0.00           | 2.22          |
| 1426711_at         | Tmco3         | transmembrane and coiled-coil domains 3                                   | 5.10           | 0.00           | 1.80          |
| 1436325_at         | Rora          | RAR-related orphan receptor alpha                                         | 5.05           | 0.00           | 2.71          |
| 1434313_at         | Ccdc126       | coiled-coil domain containing 126                                         | 4.94           | 0.00           | 2.21          |
| 1415911_at         | Impact        | imprinted and ancient                                                     | 4.94           | 0.00           | 2.10          |
| 1424186_at         | Ccdc80        | coiled-coil domain containing 80                                          | 4.88           | 0.00           | 3.80          |
| 1416654_at         | Slc31a2       | solute carrier family 31. member 2                                        | 4.82           | 0.00           | 1.99          |
| 1422186_s_at       | Cyb5r3        | cytochrome b5 reductase 3                                                 | 4.81           | 0.00           | 1.57          |
| 1424654_at         | Acp2          | acid phosphatase 2. lysosomal                                             | 4.79           | 0.00           | 1.36          |
| 1436788_at         | Acp2          | acid phosphatase 2. lysosomal                                             | 4.61           | 0.01           | 1.57          |
| 1447556_x_at       | 1700094D03Rik | RIKEN cDNA 1700094D03 gene                                                | 4.75           | 0.01           | 1.26          |
| 1417632_at         | Atp6v0a1      | ATPase. H+ transporting. lysosomal V0 subunit A1                          | 4.75           | 0.01           | 2.02          |
| 1428312_at         | Lrrc57        | leucine rich repeat containing 57                                         | 4.72           | 0.01           | 1.55          |
| 1417659_at         | Vps29         | vacuolar protein sorting 29 (S. pombe)                                    | 4.67           | 0.01           | 1.44          |
| 1417660_s_at       | Vps29         | vacuolar protein sorting 29 (S. pombe)                                    | 4.44           | 0.01           | 1.37          |
| 1419548_at         | Kpna1         | karyopherin (importin) alpha 1                                            | 4.66           | 0.01           | 1.28          |

| <i>Probeset ID</i> | <i>Symbol</i> | <i>Gene Name</i>                                                             | <i>d-value</i> | <i>q-value</i> | <i>R-fold</i> |
|--------------------|---------------|------------------------------------------------------------------------------|----------------|----------------|---------------|
| 1460260_s_at       | Kpna1         | karyopherin (importin) alpha 1                                               | 4.47           | 0.01           | 1.27          |
| 1434162_at         | 2700078E11Rik | RIKEN cDNA 2700078E11 gene                                                   | 4.65           | 0.01           | 1.44          |
| 1423549_at         | Slc1a4        | solute carrier family 1 (glutamate/neutral amino acid transporter), member 4 | 4.65           | 0.01           | 2.14          |
| 1452719_at         | Zdhhc24       | zinc finger, DHHC domain containing 24                                       | 4.63           | 0.01           | 2.29          |
| 1421063_s_at       | Snurf         | SNRPN upstream reading frame                                                 | 4.62           | 0.01           | 1.83          |
| 1421824_at         | Bace1         | beta-site APP cleaving enzyme 1                                              | 4.51           | 0.01           | 1.66          |
| 1422541_at         | Ptpm          | protein tyrosine phosphatase, receptor type, M                               | 4.50           | 0.01           | 1.64          |
| 1438442_at         | 5730470L24Rik | RIKEN cDNA 5730470L24 gene                                                   | 4.42           | 0.01           | 1.74          |
| 1422594_at         | 5730470L24Rik | RIKEN cDNA 5730470L24 gene                                                   | 4.32           | 0.01           | 1.45          |
| 1417981_at         | Insig2        | insulin induced gene 2                                                       | 4.42           | 0.01           | 1.54          |
| 1452955_at         | Gtf2h5        | general transcription factor IIH, polypeptide 5                              | 4.41           | 0.01           | 1.66          |
| 1454929_s_at       | Safb          | scaffold attachment factor B                                                 | -4.03          | 0.01           | 0.72          |
| 1454928_at         | Safb          | scaffold attachment factor B                                                 | -4.77          | 0.01           | 0.65          |
| 1417886_at         | Ints5         | integrator complex subunit 5                                                 | -4.04          | 0.01           | 0.75          |
| 1454875_a_at       | Rbbp4         | retinoblastoma binding protein 4                                             | -4.04          | 0.01           | 0.62          |
| 1434892_x_at       | Rbbp4         | retinoblastoma binding protein 4                                             | -6.08          | 0.00           | 0.64          |
| 1423882_at         | Rfwd3         | ring finger and WD repeat domain 3                                           | -4.04          | 0.01           | 0.59          |
| 1417238_at         | Ewsr1         | Ewing sarcoma breakpoint region 1                                            | -4.05          | 0.01           | 0.64          |
| 1443466_s_at       | Polr3b        | polymerase (RNA) III (DNA directed) polypeptide B                            | -4.05          | 0.01           | 0.79          |
| 1452107_s_at       | NA            | NA                                                                           | -4.05          | 0.01           | 0.17          |
| 1419152_at         | 2810417H13Rik | RIKEN cDNA 2810417H13 gene                                                   | -4.06          | 0.01           | 0.61          |
| 1419153_at         | 2810417H13Rik | RIKEN cDNA 2810417H13 gene                                                   | -6.04          | 0.00           | 0.23          |
| 1437286_x_at       | 1110020G09Rik | RIKEN cDNA 1110020G09 gene                                                   | -4.08          | 0.01           | 0.82          |
| 1437285_at         | 1110020G09Rik | RIKEN cDNA 1110020G09 gene                                                   | -4.84          | 0.00           | 0.76          |
| 1437287_at         | 1110020G09Rik | RIKEN cDNA 1110020G09 gene                                                   | -7.45          | 0.00           | 0.49          |
| 1453422_a_at       | 1110020G09Rik | RIKEN cDNA 1110020G09 gene                                                   | -8.03          | 0.00           | 0.51          |
| 1436654_at         | Gen1          | Gen homolog 1, endonuclease (Drosophila)                                     | -4.11          | 0.01           | 0.59          |
| 1458373_at         | Gen1          | Gen homolog 1, endonuclease (Drosophila)                                     | -5.47          | 0.00           | 0.59          |
| 1415869_a_at       | Trim28        | tripartite motif-containing 28                                               | -4.11          | 0.01           | 0.61          |
| 1456308_x_at       | Trim28        | tripartite motif-containing 28                                               | -5.13          | 0.00           | 0.62          |
| 1448358_s_at       | Snrpg         | small nuclear ribonucleoprotein polypeptide G                                | -4.12          | 0.01           | 0.63          |
| 1433830_at         | Hnrnpa2b1     | heterogeneous nuclear ribonucleoprotein A2/B1                                | -4.12          | 0.01           | 0.42          |
| 1434047_x_at       | Hnrnpa2b1     | heterogeneous nuclear ribonucleoprotein A2/B1                                | -4.60          | 0.01           | 0.65          |
| 1433829_a_at       | Hnrnpa2b1     | heterogeneous nuclear ribonucleoprotein A2/B1                                | -5.38          | 0.00           | 0.69          |
| 1420365_a_at       | Hnrnpa2b1     | heterogeneous nuclear ribonucleoprotein A2/B1                                | -6.20          | 0.00           | 0.47          |
| 1429871_at         | Hmmr          | hyaluronan mediated motility receptor (RHAMM)                                | -4.12          | 0.01           | 0.59          |
| 1450157_a_at       | Hmmr          | hyaluronan mediated motility receptor (RHAMM)                                | -5.69          | 0.00           | 0.28          |
| 1427541_x_at       | Hmmr          | hyaluronan mediated motility receptor (RHAMM)                                | -6.71          | 0.00           | 0.32          |
| 1450156_a_at       | Hmmr          | hyaluronan mediated motility receptor (RHAMM)                                | -6.72          | 0.00           | 0.30          |
| 1425815_a_at       | Hmmr          | hyaluronan mediated motility receptor (RHAMM)                                | -7.26          | 0.00           | 0.31          |
| 1442454_at         | Top2a         | topoisomerase (DNA) II alpha                                                 | -4.12          | 0.01           | 0.44          |
| 1454694_a_at       | Top2a         | topoisomerase (DNA) II alpha                                                 | -6.79          | 0.00           | 0.22          |
| 1435077_at         | Asxl1         | additional sex combs like 1 (Drosophila)                                     | -4.13          | 0.01           | 0.61          |
| 1419741_at         | Supt16h       | suppressor of Ty 16 homolog (S. cerevisiae)                                  | -4.13          | 0.01           | 0.65          |
| 1452098_at         | Chtf18        | CTF18, chromosome transmission fidelity factor 18 homolog (S. cerevisiae)    | -4.14          | 0.01           | 0.34          |
| 1427982_s_at       | Syne2         | synaptic nuclear envelope 2                                                  | -4.15          | 0.01           | 0.28          |
| 1448103_s_at       | Nono          | non-POU-domain-containing, octamer binding protein                           | -4.15          | 0.01           | 0.76          |
| 1415820_x_at       | Nono          | non-POU-domain-containing, octamer binding protein                           | -4.98          | 0.00           | 0.70          |
| 1416393_at         | Emg1          | EMG1 nucleolar protein homolog (S. cerevisiae)                               | -4.16          | 0.01           | 0.67          |

| <i>Probeset ID</i> | <i>Symbol</i> | <i>Gene Name</i>                                                                   | <i>d-value</i> | <i>q-value</i> | <i>R-fold</i> |
|--------------------|---------------|------------------------------------------------------------------------------------|----------------|----------------|---------------|
| 1437032_x_at       | Rbm14         | RNA binding motif protein 14                                                       | -4.16          | 0.01           | 0.67          |
| 1456566_x_at       | Rbm14         | RNA binding motif protein 14                                                       | -4.34          | 0.01           | 0.59          |
| 1436979_x_at       | Rbm14         | RNA binding motif protein 14                                                       | -5.40          | 0.00           | 0.56          |
| 1433697_at         | Pat11         | protein associated with topoisomerase II homolog 1 (yeast)                         | -4.16          | 0.01           | 0.78          |
| 1455915_at         | Galnt4        | UDP-N-acetyl-alpha-D-galactosamine:polypeptide N-acetylgalactosaminyltransferase 4 | -4.17          | 0.01           | 0.65          |
| 1423460_at         | Gigyf1        | GRB10 interacting GYF protein 1                                                    | -4.17          | 0.01           | 0.79          |
| 1427685_a_at       | Synj2         | synaptojanin 2                                                                     | -4.17          | 0.01           | 0.38          |
| 1452344_at         | Synj2         | synaptojanin 2                                                                     | -4.85          | 0.00           | 0.39          |
| 1434541_x_at       | Khdrbs1       | KH domain containing, RNA binding, signal transduction associated 1                | -6.55          | 0.00           | 0.65          |
| 1418628_at         | Khdrbs1       | KH domain containing, RNA binding, signal transduction associated 1                | -7.40          | 0.00           | 0.58          |
| 1437389_x_at       | Khdrbs1       | KH domain containing, RNA binding, signal transduction associated 1                | -4.17          | 0.01           | 0.61          |
| 1418629_a_at       | Khdrbs1       | KH domain containing, RNA binding, signal transduction associated 1                | -4.45          | 0.01           | 0.63          |
| 1438462_x_at       | Khdrbs1       | KH domain containing, RNA binding, signal transduction associated 1                | -4.91          | 0.00           | 0.72          |
| 1423517_at         | LOC100038887  | hypothetical protein LOC100038887                                                  | -4.17          | 0.01           | 0.80          |
| 1455988_a_at       | LOC100038887  | hypothetical protein LOC100038887                                                  | -4.20          | 0.01           | 0.77          |
| 1459740_s_at       | Ucp2          | uncoupling protein 2 (mitochondrial, proton carrier)                               | -4.19          | 0.01           | 0.72          |
| 1456005_a_at       | Bcl2l11       | BCL2-like 11 (apoptosis facilitator)                                               | -4.19          | 0.01           | 0.45          |
| 1435448_at         | Bcl2l11       | BCL2-like 11 (apoptosis facilitator)                                               | -4.81          | 0.00           | 0.58          |
| 1435449_at         | Bcl2l11       | BCL2-like 11 (apoptosis facilitator)                                               | -4.98          | 0.00           | 0.52          |
| 1452816_at         | Mlf1ip        | myeloid leukemia factor 1 interacting protein                                      | -4.20          | 0.01           | 0.72          |
| 1428518_at         | Mlf1ip        | myeloid leukemia factor 1 interacting protein                                      | -6.15          | 0.00           | 0.36          |
| 1456325_at         | Cep68         | centrosomal protein 68                                                             | -4.20          | 0.01           | 0.66          |
| 1441340_at         | Cep68         | centrosomal protein 68                                                             | -5.33          | 0.00           | 0.60          |
| 1417434_at         | Gpd2          | glycerol phosphate dehydrogenase 2, mitochondrial                                  | -4.20          | 0.01           | 0.65          |
| 1428827_at         | Whsc1         | Wolf-Hirschhorn syndrome candidate 1 (human)                                       | -4.20          | 0.01           | 0.36          |
| 1455228_at         | Whsc1         | Wolf-Hirschhorn syndrome candidate 1 (human)                                       | -5.54          | 0.00           | 0.58          |
| 1416621_at         | Llgl1         | lethal giant larvae homolog 1 (Drosophila)                                         | -4.23          | 0.01           | 0.57          |
| 1448778_at         | Sfrs4         | splicing factor, arginine/serine-rich 4 (SRp75)                                    | -4.24          | 0.01           | 0.52          |
| 1446760_at         | Trip13        | thyroid hormone receptor interactor 13                                             | -4.24          | 0.01           | 0.79          |
| 1429294_at         | Trip13        | thyroid hormone receptor interactor 13                                             | -7.05          | 0.00           | 0.29          |
| 1429295_s_at       | Trip13        | thyroid hormone receptor interactor 13                                             | -7.35          | 0.00           | 0.23          |
| 1439459_x_at       | Acly          | ATP citrate lyase                                                                  | -4.25          | 0.01           | 0.81          |
| 1449254_at         | Spp1          | secreted phosphoprotein 1                                                          | -4.25          | 0.01           | 0.27          |
| 1418330_at         | Ctcf          | CCCTC-binding factor                                                               | -4.26          | 0.01           | 0.68          |
| 1422823_at         | Eps8          | epidermal growth factor receptor pathway substrate 8                               | -4.26          | 0.01           | 0.41          |
| 1425733_a_at       | Eps8          | epidermal growth factor receptor pathway substrate 8                               | -4.33          | 0.01           | 0.52          |
| 1422824_s_at       | Eps8          | epidermal growth factor receptor pathway substrate 8                               | -4.84          | 0.00           | 0.37          |
| 1454042_a_at       | Srpk1         | serine/arginine-rich protein specific kinase 1                                     | -4.27          | 0.01           | 0.67          |
| 1448774_at         | Stoml2        | stomatin (Epb7.2)-like 2                                                           | -4.28          | 0.01           | 0.56          |
| 1431226_a_at       | Fndc4         | fibronectin type III domain containing 4                                           | -4.29          | 0.01           | 0.39          |
| 1449012_s_at       | Fndc4         | fibronectin type III domain containing 4                                           | -4.43          | 0.01           | 0.47          |
| 1418372_at         | Adsl          | adenylosuccinate lyase                                                             | -4.29          | 0.01           | 0.63          |
| 1423050_s_at       | Hnrnpu        | heterogeneous nuclear ribonucleoprotein U                                          | -4.30          | 0.01           | 0.75          |
| 1423051_at         | Hnrnpu        | heterogeneous nuclear ribonucleoprotein U                                          | -6.00          | 0.00           | 0.52          |
| 1437244_at         | Gas2l3        | growth arrest-specific 2 like 3                                                    | -4.31          | 0.01           | 0.42          |
| 1455980_a_at       | Gas2l3        | growth arrest-specific 2 like 3                                                    | -4.34          | 0.01           | 0.36          |
| 1453416_at         | Gas2l3        | growth arrest-specific 2 like 3                                                    | -4.36          | 0.01           | 0.41          |
| 1415917_at         | Mthfd1        | methylenetetrahydrofolate dehydrogenase (NADP+ dependent).                         | -4.31          | 0.01           | 0.57          |

| <i>Probeset ID</i> | <i>Symbol</i> | <i>Gene Name</i>                                                                                                                       | <i>d-value</i> | <i>q-value</i> | <i>R-fold</i> |
|--------------------|---------------|----------------------------------------------------------------------------------------------------------------------------------------|----------------|----------------|---------------|
|                    |               | methenyltetrahydrofolate cyclohydrolase. formyltetrahydrofolate synthase                                                               |                |                |               |
| 1415916_a_at       | Mthfd1        | methylenetetrahydrofolate dehydrogenase (NADP+ dependent).<br>methenyltetrahydrofolate cyclohydrolase. formyltetrahydrofolate synthase | -4.70          | 0.01           | 0.58          |
| 1418822_a_at       | Arf6          | ADP-ribosylation factor 6                                                                                                              | -4.32          | 0.01           | 0.75          |
| 1427064_a_at       | Scrib         | scribbled homolog (Drosophila)                                                                                                         | -4.34          | 0.01           | 0.61          |
| 1451356_at         | Anp32e        | acidic (leucine-rich) nuclear phosphoprotein 32 family. member E                                                                       | -4.35          | 0.01           | 0.67          |
| 1420592_a_at       | Anp32e        | acidic (leucine-rich) nuclear phosphoprotein 32 family. member E                                                                       | -6.61          | 0.00           | 0.46          |
| 1453769_at         | Ckap2l        | cytoskeleton associated protein 2-like                                                                                                 | -4.35          | 0.01           | 0.47          |
| 1435938_at         | Ckap2l        | cytoskeleton associated protein 2-like                                                                                                 | -6.43          | 0.00           | 0.45          |
| 1416415_a_at       | H2afz         | H2A histone family. member Z                                                                                                           | -4.35          | 0.01           | 0.63          |
| 1455609_at         | Cit           | citron                                                                                                                                 | -4.35          | 0.01           | 0.40          |
| 1422922_at         | Recql4        | RecQ protein-like 4                                                                                                                    | -4.35          | 0.01           | 0.63          |
| 1449343_s_at       | Sin3a         | transcriptional regulator. SIN3A (yeast)                                                                                               | -4.36          | 0.01           | 0.65          |
| 1419102_at         | Sin3a         | transcriptional regulator. SIN3A (yeast)                                                                                               | -4.42          | 0.01           | 0.57          |
| 1419101_at         | Sin3a         | transcriptional regulator. SIN3A (yeast)                                                                                               | -4.62          | 0.01           | 0.64          |
| 1439421_x_at       | Cbx3          | chromobox homolog 3 (Drosophila HP1 gamma)                                                                                             | -4.37          | 0.01           | 0.59          |
| 1448504_a_at       | Cbx3          | chromobox homolog 3 (Drosophila HP1 gamma)                                                                                             | -4.67          | 0.01           | 0.57          |
| 1434650_at         | Pogz          | pogo transposable element with ZNF domain                                                                                              | -4.37          | 0.01           | 0.67          |
| 1457708_at         | Mbd4          | methyl-CpG binding domain protein 4                                                                                                    | -4.38          | 0.01           | 0.65          |
| 1428546_at         | Syncrip       | synaptotagmin binding. cytoplasmic RNA interacting protein                                                                             | -4.38          | 0.01           | 0.58          |
| 1426402_at         | Syncrip       | synaptotagmin binding. cytoplasmic RNA interacting protein                                                                             | -5.59          | 0.00           | 0.65          |
| 1438601_at         | Pkmyt1        | protein kinase. membrane associated tyrosine/threonine 1                                                                               | -4.39          | 0.01           | 0.86          |
| 1426783_at         | Kat2a         | K(lysine) acetyltransferase 2A                                                                                                         | -4.40          | 0.01           | 0.68          |
| 1421237_at         | Tmpo          | thymopoietin                                                                                                                           | -4.41          | 0.01           | 0.50          |
| 1426349_s_at       | Tmpo          | thymopoietin                                                                                                                           | -5.91          | 0.00           | 0.32          |
| 1428976_at         | Tmpo          | thymopoietin                                                                                                                           | -6.43          | 0.00           | 0.44          |
| 1452036_a_at       | Tmpo          | thymopoietin                                                                                                                           | -7.22          | 0.00           | 0.29          |
| 1424895_at         | Gpsm2         | G-protein signalling modulator 2 (AGS3-like. C. elegans)                                                                               | -4.41          | 0.01           | 0.52          |
| 1449293_a_at       | Skp2          | S-phase kinase-associated protein 2 (p45)                                                                                              | -4.42          | 0.01           | 0.44          |
| 1436000_a_at       | Skp2          | S-phase kinase-associated protein 2 (p45)                                                                                              | -5.13          | 0.00           | 0.36          |
| 1460247_a_at       | Skp2          | S-phase kinase-associated protein 2 (p45)                                                                                              | -5.19          | 0.00           | 0.38          |
| 1437033_a_at       | Skp2          | S-phase kinase-associated protein 2 (p45)                                                                                              | -5.92          | 0.00           | 0.37          |
| 1418969_at         | Skp2          | S-phase kinase-associated protein 2 (p45)                                                                                              | -6.19          | 0.00           | 0.39          |
| 1448016_at         | Sass6         | spindle assembly 6 homolog (C. elegans)                                                                                                | -4.44          | 0.01           | 0.54          |
| 1453490_at         | Sass6         | spindle assembly 6 homolog (C. elegans)                                                                                                | -7.18          | 0.00           | 0.60          |
| 1455760_at         | Slc9a5        | solute carrier family 9 (sodium/hydrogen exchanger). member 5                                                                          | -4.45          | 0.01           | 0.53          |
| 1423303_at         | Paxip1        | PAX interacting (with transcription-activation domain) protein 1                                                                       | -4.46          | 0.01           | 0.58          |
| 1438951_x_at       | Nup54         | nucleoporin 54                                                                                                                         | -4.47          | 0.01           | 0.73          |
| 1433580_at         | Nup54         | nucleoporin 54                                                                                                                         | -7.81          | 0.00           | 0.65          |
| 1429002_at         | Snw1          | SNW domain containing 1                                                                                                                | -4.47          | 0.01           | 0.79          |
| 1428224_at         | Hnrpd1        | heterogeneous nuclear ribonucleoprotein D-like                                                                                         | -4.48          | 0.01           | 0.57          |
| 1456698_s_at       | Hnrpd1        | heterogeneous nuclear ribonucleoprotein D-like                                                                                         | -4.99          | 0.00           | 0.58          |
| 1420093_s_at       | Hnrpd1        | heterogeneous nuclear ribonucleoprotein D-like                                                                                         | -5.57          | 0.00           | 0.62          |
| 1424251_a_at       | Hnrpd1        | heterogeneous nuclear ribonucleoprotein D-like                                                                                         | -7.68          | 0.00           | 0.58          |
| 1449039_a_at       | Hnrpd1        | heterogeneous nuclear ribonucleoprotein D-like                                                                                         | -8.60          | 0.00           | 0.51          |
| 1427441_a_at       | Suc1g2        | succinate-Coenzyme A ligase. GDP-forming. beta subunit                                                                                 | -4.48          | 0.01           | 0.58          |
| 1436816_at         | Nup133        | nucleoporin 133                                                                                                                        | -4.49          | 0.01           | 0.56          |
| 1451111_at         | Nup133        | nucleoporin 133                                                                                                                        | -4.84          | 0.00           | 0.55          |
| 1423787_at         | Nup133        | nucleoporin 133                                                                                                                        | -4.94          | 0.00           | 0.57          |

| <i>Probeset ID</i> | <i>Symbol</i> | <i>Gene Name</i>                                       | <i>d-value</i> | <i>q-value</i> | <i>R-fold</i> |
|--------------------|---------------|--------------------------------------------------------|----------------|----------------|---------------|
| 1449333_at         | Sf3a1         | splicing factor 3a. subunit 1                          | -4.54          | 0.01           | 0.64          |
| 1425166_at         | Rbl1          | retinoblastoma-like 1 (p107)                           | -4.55          | 0.01           | 0.43          |
| 1424156_at         | Rbl1          | retinoblastoma-like 1 (p107)                           | -5.27          | 0.00           | 0.30          |
| 1424033_at         | Sfrs7         | splicing factor. arginine/serine-rich 7                | -4.55          | 0.01           | 0.47          |
| 1424883_s_at       | Sfrs7         | splicing factor. arginine/serine-rich 7                | -5.39          | 0.00           | 0.45          |
| 1426653_at         | Mcm3          | minichromosome maintenance deficient 3 (S. cerevisiae) | -4.56          | 0.01           | 0.31          |
| 1449705_x_at       | Mcm3          | minichromosome maintenance deficient 3 (S. cerevisiae) | -5.82          | 0.00           | 0.33          |
| 1426652_at         | Mcm3          | minichromosome maintenance deficient 3 (S. cerevisiae) | -6.70          | 0.00           | 0.28          |
| 1420028_s_at       | Mcm3          | minichromosome maintenance deficient 3 (S. cerevisiae) | -6.99          | 0.00           | 0.27          |
| 1454952_s_at       | Ncapd3        | non-SMC condensin II complex. subunit D3               | -4.57          | 0.01           | 0.38          |
| 1448324_at         | Rnps1         | ribonucleic acid binding protein S1                    | -4.58          | 0.01           | 0.62          |
| 1435728_at         | Tyw3          | tRNA-yW synthesizing protein 3 homolog (S. cerevisiae) | -4.59          | 0.01           | 0.70          |
| 1425022_at         | Usp3          | ubiquitin specific peptidase 3                         | -4.59          | 0.01           | 0.73          |
| 1425023_at         | Usp3          | ubiquitin specific peptidase 3                         | -6.24          | 0.00           | 0.67          |
| 1415829_at         | Lbr           | lamin B receptor                                       | -4.60          | 0.01           | 0.50          |
| 1444235_at         | 1700025G04Rik | RIKEN cDNA 1700025G04 gene                             | -4.61          | 0.01           | 0.67          |
| 1436431_at         | 1700025G04Rik | RIKEN cDNA 1700025G04 gene                             | -5.48          | 0.00           | 0.51          |
| 1423524_at         | Mastl         | microtubule associated serine/threonine kinase-like    | -4.62          | 0.01           | 0.35          |
| 1423525_at         | Mastl         | microtubule associated serine/threonine kinase-like    | -5.25          | 0.00           | 0.50          |
| 1439753_x_at       | Six4          | sine oculis-related homeobox 4 homolog (Drosophila)    | -4.65          | 0.01           | 0.47          |
| 1456862_at         | Six4          | sine oculis-related homeobox 4 homolog (Drosophila)    | -4.90          | 0.00           | 0.44          |
| 1425767_a_at       | Six4          | sine oculis-related homeobox 4 homolog (Drosophila)    | -5.22          | 0.00           | 0.53          |
| 1448235_s_at       | Hmgb1         | high mobility group box 1                              | -4.66          | 0.01           | 0.41          |
| 1435324_x_at       | Hmgb1         | high mobility group box 1                              | -5.14          | 0.00           | 0.49          |
| 1425048_a_at       | Hmgb1         | high mobility group box 1                              | -5.42          | 0.00           | 0.57          |
| 1416176_at         | Hmgb1         | high mobility group box 1                              | -6.07          | 0.00           | 0.56          |
| 1423123_at         | Rad54l        | RAD54 like (S. cerevisiae)                             | -4.66          | 0.01           | 0.66          |
| 1450862_at         | Rad54l        | RAD54 like (S. cerevisiae)                             | -6.05          | 0.00           | 0.27          |
| 1419620_at         | Pttg1         | pituitary tumor-transforming 1                         | -4.66          | 0.01           | 0.71          |
| 1438390_s_at       | Pttg1         | pituitary tumor-transforming 1                         | -5.18          | 0.00           | 0.42          |
| 1424105_a_at       | Pttg1         | pituitary tumor-transforming 1                         | -5.28          | 0.00           | 0.36          |
| 1420937_at         | Cpsf2         | cleavage and polyadenylation specific factor 2         | -4.66          | 0.01           | 0.71          |
| 1420936_s_at       | Cpsf2         | cleavage and polyadenylation specific factor 2         | -4.94          | 0.00           | 0.67          |
| 1431089_at         | Cpsf2         | cleavage and polyadenylation specific factor 2         | -5.60          | 0.00           | 0.48          |
| 1421354_at         | Prkg2         | protein kinase. cGMP-dependent. type II                | -4.67          | 0.01           | 0.68          |
| 1435460_at         | Prkg2         | protein kinase. cGMP-dependent. type II                | -10.21         | 0.00           | 0.16          |
| 1435162_at         | Prkg2         | protein kinase. cGMP-dependent. type II                | -11.69         | 0.00           | 0.08          |
| 1436747_at         | 1110014K08Rik | RIKEN cDNA 1110014K08 gene                             | -4.68          | 0.01           | 0.60          |
| 1436030_at         | Cachd1        | cache domain containing 1                              | -4.68          | 0.01           | 0.73          |
| 1434602_at         | Med13l        | mediator complex subunit 13-like                       | -4.68          | 0.01           | 0.63          |
| 1438339_at         | Fancd2        | Fanconi anemia. complementation group D2               | -4.69          | 0.01           | 0.51          |
| 1439091_at         | Fancd2        | Fanconi anemia. complementation group D2               | -4.82          | 0.00           | 0.36          |
| 1438833_at         | Casc5         | cancer susceptibility candidate 5                      | -4.69          | 0.01           | 0.55          |
| 1430193_at         | Casc5         | cancer susceptibility candidate 5                      | -5.92          | 0.00           | 0.42          |
| 1416126_at         | Rpo1-2        | RNA polymerase 1-2                                     | -4.70          | 0.01           | 0.61          |
| 1456730_x_at       | Actl6a        | actin-like 6A                                          | -4.71          | 0.01           | 0.65          |
| 1416569_at         | Actl6a        | actin-like 6A                                          | -4.74          | 0.01           | 0.63          |
| 1415851_a_at       | Impdh2        | inosine 5'-phosphate dehydrogenase 2                   | -4.72          | 0.01           | 0.57          |
| 1415852_at         | Impdh2        | inosine 5'-phosphate dehydrogenase 2                   | -7.95          | 0.00           | 0.55          |



| <i>Probeset ID</i> | <i>Symbol</i> | <i>Gene Name</i>                                                                   | <i>d-value</i> | <i>q-value</i> | <i>R-fold</i> |
|--------------------|---------------|------------------------------------------------------------------------------------|----------------|----------------|---------------|
| 1448231_at         | Fkbp5         | FK506 binding protein 5                                                            | -4.73          | 0.01           | 0.45          |
| 1416125_at         | Fkbp5         | FK506 binding protein 5                                                            | -5.43          | 0.00           | 0.32          |
| 1459765_s_at       | Sf1           | splicing factor 1                                                                  | -4.76          | 0.01           | 0.61          |
| 1416161_at         | Rad21         | RAD21 homolog (S. pombe)                                                           | -4.76          | 0.01           | 0.53          |
| 1436026_at         | Zfp703        | zinc finger protein 703                                                            | -4.77          | 0.01           | 0.77          |
| 1423431_a_at       | Mybbp1a       | MYB binding protein (P160) 1a                                                      | -4.77          | 0.01           | 0.67          |
| 1421934_at         | Cbx5          | chromobox homolog 5 (Drosophila HP1a)                                              | -4.77          | 0.01           | 0.63          |
| 1435575_at         | Kntc1         | kinetochore associated 1                                                           | -4.78          | 0.01           | 0.32          |
| 1423674_at         | Usp1          | ubiquitin specific peptdiase 1                                                     | -4.78          | 0.01           | 0.45          |
| 1451080_at         | Usp1          | ubiquitin specific peptdiase 1                                                     | -6.28          | 0.00           | 0.38          |
| 1423675_at         | Usp1          | ubiquitin specific peptdiase 1                                                     | -7.28          | 0.00           | 0.37          |
| 1426580_at         | Plk4          | polo-like kinase 4 (Drosophila)                                                    | -4.81          | 0.00           | 0.36          |
| 1452115_a_at       | Plk4          | polo-like kinase 4 (Drosophila)                                                    | -5.30          | 0.00           | 0.31          |
| 1419838_s_at       | Plk4          | polo-like kinase 4 (Drosophila)                                                    | -5.52          | 0.00           | 0.28          |
| 1456055_x_at       | Pold1         | polymerase (DNA directed). delta 1. catalytic subunit                              | -4.81          | 0.00           | 0.41          |
| 1448187_at         | Pold1         | polymerase (DNA directed). delta 1. catalytic subunit                              | -4.84          | 0.00           | 0.45          |
| 1454978_at         | Ttyh3         | tweety homolog 3 (Drosophila)                                                      | -4.82          | 0.00           | 0.59          |
| 1415781_a_at       | Sumo2         | SMT3 suppressor of mif two 3 homolog 2 (yeast)                                     | -4.82          | 0.00           | 0.82          |
| 1415782_at         | Sumo2         | SMT3 suppressor of mif two 3 homolog 2 (yeast)                                     | -6.17          | 0.00           | 0.77          |
| 1434850_at         | Iqgap3        | IQ motif containing GTPase activating protein 3                                    | -4.82          | 0.00           | 0.43          |
| 1429104_at         | Limd2         | LIM domain containing 2                                                            | -4.82          | 0.00           | 0.49          |
| 1447766_x_at       | Limd2         | LIM domain containing 2                                                            | -5.02          | 0.00           | 0.69          |
| 1456377_x_at       | Limd2         | LIM domain containing 2                                                            | -5.56          | 0.00           | 0.42          |
| 1428310_at         | Larp7         | La ribonucleoprotein domain family. member 7                                       | -4.82          | 0.00           | 0.54          |
| 1429558_a_at       | Larp7         | La ribonucleoprotein domain family. member 7                                       | -6.18          | 0.00           | 0.56          |
| 1427886_at         | Pom121        | nuclear pore membrane protein 121                                                  | -4.83          | 0.00           | 0.64          |
| 1436036_at         | Whsc2         | Wolf-Hirschhorn syndrome candidate 2 (human)                                       | -4.83          | 0.00           | 0.52          |
| 1428532_at         | Ints7         | integrator complex subunit 7                                                       | -4.83          | 0.00           | 0.54          |
| 1433552_a_at       | Polr2b        | polymerase (RNA) II (DNA directed) polypeptide B                                   | -4.85          | 0.00           | 0.68          |
| 1433669_at         | Akap8         | A kinase (PRKA) anchor protein 8                                                   | -4.85          | 0.00           | 0.65          |
| 1450983_at         | Akap8         | A kinase (PRKA) anchor protein 8                                                   | -5.47          | 0.00           | 0.48          |
| 1417940_s_at       | Rad51ap1      | RAD51 associated protein 1                                                         | -4.86          | 0.00           | 0.56          |
| 1417938_at         | Rad51ap1      | RAD51 associated protein 1                                                         | -5.42          | 0.00           | 0.32          |
| 1448899_s_at       | Rad51ap1      | RAD51 associated protein 1                                                         | -5.91          | 0.00           | 0.30          |
| 1417939_at         | Rad51ap1      | RAD51 associated protein 1                                                         | -6.99          | 0.00           | 0.37          |
| 1453053_at         | 2610036L11Rik | RIKEN cDNA 2610036L11 gene                                                         | -4.87          | 0.00           | 0.63          |
| 1429156_at         | 2610036L11Rik | RIKEN cDNA 2610036L11 gene                                                         | -4.92          | 0.00           | 0.48          |
| 1460429_at         | Cdc5l         | cell division cycle 5-like (S. pombe)                                              | -4.88          | 0.00           | 0.62          |
| 1418640_at         | Sirt1         | sirtuin 1 (silent mating type information regulation 2. homolog) 1 (S. cerevisiae) | -4.88          | 0.00           | 0.64          |
| 1436872_at         | Tacc3         | transforming. acidic coiled-coil containing protein 3                              | -4.90          | 0.00           | 0.59          |
| 1417450_a_at       | Tacc3         | transforming. acidic coiled-coil containing protein 3                              | -6.21          | 0.00           | 0.29          |
| 1455834_x_at       | Tacc3         | transforming. acidic coiled-coil containing protein 3                              | -6.32          | 0.00           | 0.46          |
| 1439510_at         | Sgol1         | shugoshin-like 1 (S. pombe)                                                        | -4.91          | 0.00           | 0.29          |
| 1418919_at         | Sgol1         | shugoshin-like 1 (S. pombe)                                                        | -6.02          | 0.00           | 0.27          |
| 1450920_at         | Ccnb2         | cyclin B2                                                                          | -4.92          | 0.00           | 0.34          |
| 1448165_at         | Casp2         | caspase 2                                                                          | -4.93          | 0.00           | 0.58          |
| 1415810_at         | Uhrf1         | ubiquitin-like. containing PHD and RING finger domains. 1                          | -4.94          | 0.00           | 0.21          |
| 1415811_at         | Uhrf1         | ubiquitin-like. containing PHD and RING finger domains. 1                          | -5.92          | 0.00           | 0.23          |
| 1436118_at         | Vangl2        | vang-like 2 (van gogh. Drosophila)                                                 | -4.94          | 0.00           | 0.52          |



| <i>Probeset ID</i> | <i>Symbol</i> | <i>Gene Name</i>                                                                          | <i>d-value</i> | <i>q-value</i> | <i>R-fold</i> |
|--------------------|---------------|-------------------------------------------------------------------------------------------|----------------|----------------|---------------|
| 1455592_at         | Vangl2        | vang-like 2 (van gogh. Drosophila)                                                        | -5.18          | 0.00           | 0.50          |
| 1455220_at         | Frat2         | frequently rearranged in advanced T-cell lymphomas 2                                      | -4.94          | 0.00           | 0.62          |
| 1447623_s_at       | Prkd1         | protein kinase D1                                                                         | -4.94          | 0.00           | 0.49          |
| 1422673_at         | Prkd1         | protein kinase D1                                                                         | -7.38          | 0.00           | 0.52          |
| 1450874_at         | Matr3         | matrin 3                                                                                  | -4.96          | 0.00           | 0.75          |
| 1436796_at         | Matr3         | matrin 3                                                                                  | -5.18          | 0.00           | 0.53          |
| 1434888_a_at       | Matr3         | matrin 3                                                                                  | -6.33          | 0.00           | 0.65          |
| 1438368_a_at       | Matr3         | matrin 3                                                                                  | -8.15          | 0.00           | 0.61          |
| 1456652_at         | Dtl           | denticleless homolog (Drosophila)                                                         | -4.98          | 0.00           | 0.46          |
| 1434695_at         | Dtl           | denticleless homolog (Drosophila)                                                         | -5.53          | 0.00           | 0.25          |
| 1432179_x_at       | 2810433K01Rik | RIKEN cDNA 2810433K01 gene                                                                | -5.00          | 0.00           | 0.57          |
| 1450496_a_at       | 2810433K01Rik | RIKEN cDNA 2810433K01 gene                                                                | -6.43          | 0.00           | 0.24          |
| 1452315_at         | Kif11         | kinesin family member 11                                                                  | -5.01          | 0.00           | 0.32          |
| 1452314_at         | Kif11         | kinesin family member 11                                                                  | -7.03          | 0.00           | 0.23          |
| 1435306_a_at       | Kif11         | kinesin family member 11                                                                  | -9.48          | 0.00           | 0.24          |
| 1460221_at         | Ptges3        | prostaglandin E synthase 3 (cytosolic)                                                    | -5.01          | 0.00           | 0.74          |
| 1417998_at         | Ptges3        | prostaglandin E synthase 3 (cytosolic)                                                    | -6.46          | 0.00           | 0.72          |
| 1436018_at         | Mex3a         | mex3 homolog A (C. elegans)                                                               | -5.02          | 0.00           | 0.65          |
| 1455529_at         | Mex3a         | mex3 homolog A (C. elegans)                                                               | -6.32          | 0.00           | 0.49          |
| 1450929_at         | Zfp57         | zinc finger protein 57                                                                    | -5.03          | 0.00           | 0.57          |
| 1454801_at         | Ankrd28       | ankyrin repeat domain 28                                                                  | -5.03          | 0.00           | 0.51          |
| 1434630_at         | Ankrd28       | ankyrin repeat domain 28                                                                  | -6.07          | 0.00           | 0.46          |
| 1437414_at         | Zfp217        | zinc finger protein 217                                                                   | -5.03          | 0.00           | 0.52          |
| 1456721_at         | Thsd7a        | thrombospondin, type I, domain containing 7A                                              | -5.07          | 0.00           | 0.60          |
| 1453067_at         | Apitd1        | apoptosis-inducing, TAF9-like domain 1                                                    | -5.09          | 0.00           | 0.53          |
| 1424092_at         | Epb4.1        | erythrocyte protein band 4.1                                                              | -5.09          | 0.00           | 0.45          |
| 1424766_at         | Ercc6l        | excision repair cross-complementing rodent repair deficiency complementation group 6-like | -5.10          | 0.00           | 0.34          |
| 1451400_at         | Gemin8        | gem (nuclear organelle) associated protein 8                                              | -5.11          | 0.00           | 0.60          |
| 1423755_at         | Zcchc8        | zinc finger, CCHC domain containing 8                                                     | -5.12          | 0.00           | 0.59          |
| 1451306_at         | Cdca7l        | cell division cycle associated 7 like                                                     | -5.13          | 0.00           | 0.41          |
| 1438161_s_at       | Rfc4          | replication factor C (activator 1) 4                                                      | -5.13          | 0.00           | 0.35          |
| 1424321_at         | Rfc4          | replication factor C (activator 1) 4                                                      | -5.58          | 0.00           | 0.40          |
| 1437187_at         | E2f7          | E2F transcription factor 7                                                                | -5.14          | 0.00           | 0.30          |
| 1435595_at         | 1810011O10Rik | RIKEN cDNA 1810011O10 gene                                                                | -5.16          | 0.00           | 0.42          |
| 1451415_at         | 1810011O10Rik | RIKEN cDNA 1810011O10 gene                                                                | -7.98          | 0.00           | 0.18          |
| 1428648_at         | Cand1         | cullin associated and neddylation disassociated 1                                         | -5.17          | 0.00           | 0.77          |
| 1447787_x_at       | Gjc1          | gap junction protein, gamma 1                                                             | -5.20          | 0.00           | 0.46          |
| 1449094_at         | Gjc1          | gap junction protein, gamma 1                                                             | -6.29          | 0.00           | 0.43          |
| 1433960_at         | Isg20l2       | interferon stimulated exonuclease gene 20-like 2                                          | -5.21          | 0.00           | 0.65          |
| 1416167_at         | Prdx4         | peroxiredoxin 4                                                                           | -5.21          | 0.00           | 0.69          |
| 1436892_at         | Spred2        | sprouty-related, EVH1 domain containing 2                                                 | -5.21          | 0.00           | 0.46          |
| 1434403_at         | Spred2        | sprouty-related, EVH1 domain containing 2                                                 | -6.49          | 0.00           | 0.47          |
| 1456079_x_at       | Apex1         | apurinic/apyrimidinic endonuclease 1                                                      | -5.26          | 0.00           | 0.64          |
| 1416135_at         | Apex1         | apurinic/apyrimidinic endonuclease 1                                                      | -5.74          | 0.00           | 0.65          |
| 1433935_at         | AU020206      | expressed sequence AU020206                                                               | -5.28          | 0.00           | 0.31          |
| 1416034_at         | Cd24a         | CD24a antigen                                                                             | -5.28          | 0.00           | 0.26          |
| 1448182_a_at       | Cd24a         | CD24a antigen                                                                             | -7.99          | 0.00           | 0.29          |
| 1437502_x_at       | Cd24a         | CD24a antigen                                                                             | -8.51          | 0.00           | 0.29          |

| <i>Probeset ID</i> | <i>Symbol</i> | <i>Gene Name</i>                                                                   | <i>d-value</i> | <i>q-value</i> | <i>R-fold</i> |
|--------------------|---------------|------------------------------------------------------------------------------------|----------------|----------------|---------------|
| 1424208_at         | Ptger4        | prostaglandin E receptor 4 (subtype EP4)                                           | -5.28          | 0.00           | 0.48          |
| 1417037_at         | Orc6l         | origin recognition complex. subunit 6-like (S. cerevisiae)                         | -5.30          | 0.00           | 0.56          |
| 1448224_at         | Tfam          | transcription factor A. mitochondrial                                              | -5.30          | 0.00           | 0.60          |
| 1442280_at         | D2Ertd750e    | DNA segment. Chr 2. ERATO Doi 750. expressed                                       | -5.31          | 0.00           | 0.40          |
| 1420081_s_at       | D2Ertd750e    | DNA segment. Chr 2. ERATO Doi 750. expressed                                       | -5.50          | 0.00           | 0.35          |
| 1423463_a_at       | D2Ertd750e    | DNA segment. Chr 2. ERATO Doi 750. expressed                                       | -6.28          | 0.00           | 0.34          |
| 1442134_at         | Prr11         | proline rich 11                                                                    | -5.31          | 0.00           | 0.50          |
| 1444257_at         | Prr11         | proline rich 11                                                                    | -6.72          | 0.00           | 0.39          |
| 1434079_s_at       | Mcm2          | minichromosome maintenance deficient 2 mitotin (S. cerevisiae)                     | -5.31          | 0.00           | 0.35          |
| 1448777_at         | Mcm2          | minichromosome maintenance deficient 2 mitotin (S. cerevisiae)                     | -5.56          | 0.00           | 0.29          |
| 1452459_at         | Aspm          | asp (abnormal spindle)-like. microcephaly associated (Drosophila)                  | -5.32          | 0.00           | 0.43          |
| 1422814_at         | Aspm          | asp (abnormal spindle)-like. microcephaly associated (Drosophila)                  | -6.80          | 0.00           | 0.23          |
| 1451845_a_at       | Pthr2         | peptidyl-tRNA hydrolase 2                                                          | -5.32          | 0.00           | 0.66          |
| 1452917_at         | Rfc5          | replication factor C (activator 1) 5                                               | -5.34          | 0.00           | 0.40          |
| 1452912_at         | Dscc1         | defective in sister chromatid cohesion 1 homolog (S. cerevisiae)                   | -5.37          | 0.00           | 0.23          |
| 1451119_a_at       | Fbln1         | fibulin 1                                                                          | -5.38          | 0.00           | 0.38          |
| 1422540_at         | Fbln1         | fibulin 1                                                                          | -6.46          | 0.00           | 0.48          |
| 1436723_at         | Cenpi         | centromere protein I                                                               | -5.39          | 0.00           | 0.31          |
| 1447877_x_at       | Dnmt1         | DNA methyltransferase (cytosine-5) 1                                               | -5.39          | 0.00           | 0.31          |
| 1435122_x_at       | Dnmt1         | DNA methyltransferase (cytosine-5) 1                                               | -5.44          | 0.00           | 0.30          |
| 1422946_a_at       | Dnmt1         | DNA methyltransferase (cytosine-5) 1                                               | -5.79          | 0.00           | 0.30          |
| 1417511_at         | Lyar          | Ly1 antibody reactive clone                                                        | -5.43          | 0.00           | 0.47          |
| 1426790_at         | Ssrp1         | structure specific recognition protein 1                                           | -5.45          | 0.00           | 0.50          |
| 1426789_s_at       | Ssrp1         | structure specific recognition protein 1                                           | -5.50          | 0.00           | 0.55          |
| 1426788_a_at       | Ssrp1         | structure specific recognition protein 1                                           | -6.15          | 0.00           | 0.54          |
| 1418121_at         | Vrk3          | vaccinia related kinase 3                                                          | -5.46          | 0.00           | 0.77          |
| 1427707_a_at       | Stil          | ScI/Tal1 interrupting locus                                                        | -5.46          | 0.00           | 0.36          |
| 1435254_at         | Plxnb1        | plexin B1                                                                          | -5.46          | 0.00           | 0.45          |
| 1427959_at         | Abhd10        | abhydrolase domain containing 10                                                   | -5.47          | 0.00           | 0.52          |
| 1460240_a_at       | Hnrnpc        | heterogeneous nuclear ribonucleoprotein C                                          | -5.47          | 0.00           | 0.77          |
| 1428052_a_at       | Zmym1         | zinc finger. MYM domain containing 1                                               | -5.48          | 0.00           | 0.55          |
| 1426533_at         | Nol5a         | nucleolar protein 5A                                                               | -5.49          | 0.00           | 0.47          |
| 1455035_s_at       | Nol5a         | nucleolar protein 5A                                                               | -6.21          | 0.00           | 0.45          |
| 1428291_at         | Exosc8        | exosome component 8                                                                | -5.50          | 0.00           | 0.46          |
| 1448134_at         | X99384        | cDNA sequence X99384                                                               | -5.51          | 0.00           | 0.49          |
| 1442058_s_at       | Psmc3ip       | proteasome (prosome. macropain) 26S subunit. ATPase 3. interacting protein         | -5.52          | 0.00           | 0.34          |
| 1425271_at         | Psmc3ip       | proteasome (prosome. macropain) 26S subunit. ATPase 3. interacting protein         | -6.02          | 0.00           | 0.41          |
| 1429109_at         | Msl2l1        | male-specific lethal 2-like 1 (Drosophila)                                         | -5.53          | 0.00           | 0.62          |
| 1416544_at         | Ezh2          | enhancer of zeste homolog 2 (Drosophila)                                           | -5.53          | 0.00           | 0.29          |
| 1455495_at         | Abl2          | v-abl Abelson murine leukemia viral oncogene homolog 2 (arg. Abelson-related gene) | -5.53          | 0.00           | 0.53          |
| 1455682_at         | Abl2          | v-abl Abelson murine leukemia viral oncogene homolog 2 (arg. Abelson-related gene) | -7.07          | 0.00           | 0.48          |
| 1438852_x_at       | Mcm6          | minichromosome maintenance deficient 6 (MIS5 homolog. S. pombe) (S. cerevisiae)    | -5.54          | 0.00           | 0.20          |
| 1416251_at         | Mcm6          | minichromosome maintenance deficient 6 (MIS5 homolog. S. pombe) (S. cerevisiae)    | -6.47          | 0.00           | 0.24          |
| 1416641_at         | Lig1          | ligase I. DNA. ATP-dependent                                                       | -5.54          | 0.00           | 0.31          |
| 1427094_at         | Pole2         | polymerase (DNA directed). epsilon 2 (p59 subunit)                                 | -5.54          | 0.00           | 0.26          |
| 1417586_at         | Timeless      | timeless homolog (Drosophila)                                                      | -6.44          | 0.00           | 0.31          |
| 1417587_at         | Timeless      | timeless homolog (Drosophila)                                                      | -5.55          | 0.00           | 0.32          |

| <i>Probeset ID</i> | <i>Symbol</i>      | <i>Gene Name</i>                                             | <i>d-value</i> | <i>q-value</i> | <i>R-fold</i> |
|--------------------|--------------------|--------------------------------------------------------------|----------------|----------------|---------------|
| 1426817_at         | Mki67              | antigen identified by monoclonal antibody Ki 67              | -5.56          | 0.00           | 0.20          |
| 1428029_a_at       | H2afv              | H2A histone family. member V                                 | -5.58          | 0.00           | 0.60          |
| 1427282_a_at       | Fxn                | frataxin                                                     | -5.58          | 0.00           | 0.53          |
| 1426825_at         | Fmnl3              | formin-like 3                                                | -5.59          | 0.00           | 0.65          |
| 1447275_at         | Bbs12              | Bardet-Biedl syndrome 12 (human)                             | -5.61          | 0.00           | 0.52          |
| 1426751_s_at       | Nup107             | nucleoporin 107                                              | -5.61          | 0.00           | 0.53          |
| 1417457_at         | Cks2               | CDC28 protein kinase regulatory subunit 2                    | -5.63          | 0.00           | 0.47          |
| 1417458_s_at       | Cks2               | CDC28 protein kinase regulatory subunit 2                    | -6.54          | 0.00           | 0.43          |
| 1434365_a_at       | BC055324           | cDNA sequence BC055324                                       | -5.64          | 0.00           | 0.35          |
| 1437186_at         | BC055324           | cDNA sequence BC055324                                       | -6.93          | 0.00           | 0.38          |
| 1456077_x_at       | Cdc25c             | cell division cycle 25 homolog C (S. pombe)                  | -5.66          | 0.00           | 0.41          |
| 1422252_a_at       | Cdc25c             | cell division cycle 25 homolog C (S. pombe)                  | -5.83          | 0.00           | 0.52          |
| 1426612_at         | Tipin              | timeless interacting protein                                 | -5.66          | 0.00           | 0.49          |
| 1434495_at         | Patz1              | POZ (BTB) and AT hook containing zinc finger 1               | -5.67          | 0.00           | 0.49          |
| 1429739_a_at       | Patz1              | POZ (BTB) and AT hook containing zinc finger 1               | -6.62          | 0.00           | 0.49          |
| 1450842_a_at       | Cenpa              | centromere protein A                                         | -5.67          | 0.00           | 0.31          |
| 1455523_at         | Cstf2              | cleavage stimulation factor. 3' pre-RNA subunit 2            | -5.69          | 0.00           | 0.64          |
| 1419644_at         | Cstf2              | cleavage stimulation factor. 3' pre-RNA subunit 2            | -6.31          | 0.00           | 0.50          |
| 1419645_at         | Cstf2              | cleavage stimulation factor. 3' pre-RNA subunit 2            | -8.31          | 0.00           | 0.50          |
| 1453683_a_at       | Cep55              | centrosomal protein 55                                       | -5.70          | 0.00           | 0.26          |
| 1452242_at         | Cep55              | centrosomal protein 55                                       | -8.10          | 0.00           | 0.23          |
| 1459651_s_at       | OTTMUSG00000026223 | predicted gene. OTTMUSG00000026223                           | -5.72          | 0.00           | 0.68          |
| 1416757_at         | Zwilch             | Zwilch. kinetochore associated. homolog (Drosophila)         | -5.75          | 0.00           | 0.33          |
| 1456227_x_at       | Rbbp7              | retinoblastoma binding protein 7                             | -5.76          | 0.00           | 0.65          |
| 1415775_at         | Rbbp7              | retinoblastoma binding protein 7                             | -7.93          | 0.00           | 0.62          |
| 1448519_at         | Tead2              | TEA domain family member 2                                   | -5.77          | 0.00           | 0.40          |
| 1438009_at         | Hist1h2ae          | histone cluster 1. H2ae                                      | -5.78          | 0.00           | 0.27          |
| 1416915_at         | Msh6               | mutS homolog 6 (E. coli)                                     | -5.80          | 0.00           | 0.28          |
| 1423775_s_at       | Prc1               | protein regulator of cytokinesis 1                           | -5.81          | 0.00           | 0.30          |
| 1423774_a_at       | Prc1               | protein regulator of cytokinesis 1                           | -6.35          | 0.00           | 0.29          |
| 1434190_at         | Sms                | spermine synthase                                            | -5.81          | 0.00           | 0.57          |
| 1421052_a_at       | Sms                | spermine synthase                                            | -6.65          | 0.00           | 0.37          |
| 1416868_at         | Cdkn2c             | cyclin-dependent kinase inhibitor 2C (p18. inhibits CDK4)    | -5.82          | 0.00           | 0.56          |
| 1424629_at         | Brca1              | breast cancer 1                                              | -5.82          | 0.00           | 0.22          |
| 1451417_at         | Brca1              | breast cancer 1                                              | -5.90          | 0.00           | 0.38          |
| 1424630_a_at       | Brca1              | breast cancer 1                                              | -6.79          | 0.00           | 0.32          |
| 1417681_at         | Nudt21             | nudix (nucleoside diphosphate linked moiety X)-type motif 21 | -5.82          | 0.00           | 0.64          |
| 1440299_at         | E330016A19Rik      | RIKEN cDNA E330016A19 gene                                   | -5.83          | 0.00           | 0.54          |
| 1429268_at         | 2610318N02Rik      | RIKEN cDNA 2610318N02 gene                                   | -5.84          | 0.00           | 0.50          |
| 1418084_at         | Nrp1               | neuropilin 1                                                 | -5.86          | 0.00           | 0.29          |
| 1448944_at         | Nrp1               | neuropilin 1                                                 | -6.18          | 0.00           | 0.29          |
| 1448943_at         | Nrp1               | neuropilin 1                                                 | -7.26          | 0.00           | 0.32          |
| 1437611_x_at       | Kif2c              | kinesin family member 2C                                     | -5.88          | 0.00           | 0.29          |
| 1449060_at         | Kif2c              | kinesin family member 2C                                     | -6.69          | 0.00           | 0.25          |
| 1459861_s_at       | OTTMUSG0000006609  | predicted gene. OTTMUSG0000006609                            | -5.90          | 0.00           | 0.59          |
| 1416076_at         | Ccnb1-rs1          | cyclin B1. related sequence 1                                | -5.90          | 0.00           | 0.24          |
| 1448205_at         | Ccnb1-rs1          | cyclin B1. related sequence 1                                | -7.33          | 0.00           | 0.29          |

| <i>Probeset ID</i> | <i>Symbol</i> | <i>Gene Name</i>                                                                                  | <i>d-value</i> | <i>q-value</i> | <i>R-fold</i> |
|--------------------|---------------|---------------------------------------------------------------------------------------------------|----------------|----------------|---------------|
| 1423416_at         | Smarcc1       | SWI/SNF related. matrix associated. actin dependent regulator of chromatin. subfamily c. member 1 | -5.92          | 0.00           | 0.52          |
| 1449207_a_at       | Kif20a        | kinesin family member 20A                                                                         | -5.92          | 0.00           | 0.26          |
| 1417911_at         | Ccna2         | cyclin A2                                                                                         | -5.93          | 0.00           | 0.25          |
| 1417910_at         | Ccna2         | cyclin A2                                                                                         | -6.57          | 0.00           | 0.26          |
| 1452040_a_at       | Cdca3         | cell division cycle associated 3                                                                  | -5.93          | 0.00           | 0.31          |
| 1449348_at         | Mpp6          | membrane protein. palmitoylated 6 (MAGUK p55 subfamily member 6)                                  | -5.94          | 0.00           | 0.34          |
| 1437580_s_at       | Nek2          | NIMA (never in mitosis gene a)-related expressed kinase 2                                         | -5.96          | 0.00           | 0.31          |
| 1417299_at         | Nek2          | NIMA (never in mitosis gene a)-related expressed kinase 2                                         | -6.29          | 0.00           | 0.39          |
| 1433862_at         | Espl1         | extra spindle poles-like 1 ( <i>S. cerevisiae</i> )                                               | -5.96          | 0.00           | 0.25          |
| 1428090_at         | Ptcd3         | pentatricopeptide repeat domain 3                                                                 | -5.97          | 0.00           | 0.60          |
| 1426002_a_at       | Cdc7          | cell division cycle 7 ( <i>S. cerevisiae</i> )                                                    | -5.99          | 0.00           | 0.28          |
| 1429172_a_at       | Ncapg         | on-SMC condensin I complex. subunit G                                                             | -6.02          | 0.00           | 0.26          |
| 1417926_at         | Ncapg2        | non-SMC condensin II complex. subunit G2                                                          | -6.03          | 0.00           | 0.20          |
| 1429171_a_at       | Ncapg         | on-SMC condensin I complex. subunit G                                                             | -6.84          | 0.00           | 0.19          |
| 1458447_at         | Cenpf         | centromere protein F                                                                              | -6.02          | 0.00           | 0.65          |
| 1427161_at         | Cenpf         | centromere protein F                                                                              | -7.00          | 0.00           | 0.22          |
| 1449708_s_at       | Chek1         | checkpoint kinase 1 homolog ( <i>S. pombe</i> )                                                   | -6.04          | 0.00           | 0.30          |
| 1450677_at         | Chek1         | checkpoint kinase 1 homolog ( <i>S. pombe</i> )                                                   | -6.62          | 0.00           | 0.28          |
| 1450692_at         | Kif4          | kinesin family member 4                                                                           | -6.05          | 0.00           | 0.32          |
| 1438811_at         | Dlgap5        | discs. large ( <i>Drosophila</i> ) homolog-associated protein 5                                   | -6.05          | 0.00           | 0.53          |
| 1455730_at         | Dlgap5        | discs. large ( <i>Drosophila</i> ) homolog-associated protein 5                                   | -6.52          | 0.00           | 0.34          |
| 1448191_at         | Plk1          | polo-like kinase 1 ( <i>Drosophila</i> )                                                          | -6.06          | 0.00           | 0.28          |
| 1418264_at         | Cenpk         | centromere protein K                                                                              | -6.07          | 0.00           | 0.39          |
| 1423311_s_at       | Tpbp          | trophoblast glycoprotein                                                                          | -6.09          | 0.00           | 0.34          |
| 1423092_at         | Incenp        | inner centromere protein                                                                          | -6.11          | 0.00           | 0.33          |
| 1439436_x_at       | Incenp        | inner centromere protein                                                                          | -8.72          | 0.00           | 0.30          |
| 1416410_at         | Pafah1b3      | platelet-activating factor acetylhydrolase. isoform 1b. alpha1 subunit                            | -6.14          | 0.00           | 0.36          |
| 1456280_at         | Clspn         | claspin homolog ( <i>Xenopus laevis</i> )                                                         | -6.14          | 0.00           | 0.25          |
| 1455727_at         | Zrsr2         | zinc finger (CCCH type). RNA binding motif and serine/arginine rich 2                             | -6.16          | 0.00           | 0.64          |
| 1453181_x_at       | Plscr1        | phospholipid scramblase 1                                                                         | -6.17          | 0.00           | 0.30          |
| 1429527_a_at       | Plscr1        | phospholipid scramblase 1                                                                         | -7.49          | 0.00           | 0.29          |
| 1435114_at         | Wdhd1         | WD repeat and HMG-box DNA binding protein 1                                                       | -6.17          | 0.00           | 0.32          |
| 1418380_at         | Terf1         | telomeric repeat binding factor 1                                                                 | -6.21          | 0.00           | 0.39          |
| 1415730_at         | 5730453I16Rik | RIKEN cDNA 5730453I16 gene                                                                        | -6.21          | 0.00           | 0.75          |
| 1455218_at         | 6330503K22Rik | RIKEN cDNA 6330503K22 gene                                                                        | -6.23          | 0.00           | 0.56          |
| 1460669_at         | Ilf3          | interleukin enhancer binding factor 3                                                             | -6.24          | 0.00           | 0.64          |
| 1422460_at         | Mad2l1        | MAD2 (mitotic arrest deficient. homolog)-like 1 (yeast)                                           | -6.30          | 0.00           | 0.33          |
| 1429326_at         | Cenpl         | centromere protein L                                                                              | -6.31          | 0.00           | 0.44          |
| 1446196_at         | Hmga2         | high mobility group AT-hook 2                                                                     | -6.32          | 0.00           | 0.28          |
| 1450781_at         | Hmga2         | high mobility group AT-hook 2                                                                     | -6.77          | 0.00           | 0.23          |
| 1450780_s_at       | Hmga2         | high mobility group AT-hook 2                                                                     | -7.35          | 0.00           | 0.31          |
| 1422851_at         | Hmga2         | high mobility group AT-hook 2                                                                     | -7.55          | 0.00           | 0.29          |
| 1428480_at         | Cdca8         | cell division cycle associated 8                                                                  | -6.34          | 0.00           | 0.34          |
| 1428481_s_at       | Cdca8         | cell division cycle associated 8                                                                  | -6.55          | 0.00           | 0.31          |
| 1436847_s_at       | Cdca8         | cell division cycle associated 8                                                                  | -6.61          | 0.00           | 0.29          |
| 1447363_s_at       | Bub1b         | budding uninhibited by benzimidazoles 1 homolog. beta ( <i>S. cerevisiae</i> )                    | -6.37          | 0.00           | 0.22          |
| 1416961_at         | Bub1b         | budding uninhibited by benzimidazoles 1 homolog. beta ( <i>S. cerevisiae</i> )                    | -6.76          | 0.00           | 0.25          |
| 1448113_at         | Stmn1         | stathmin 1                                                                                        | -6.95          | 0.00           | 0.35          |

| <i>Probeset ID</i> | <i>Symbol</i> | <i>Gene Name</i>                                                               | <i>d-value</i> | <i>q-value</i> | <i>R-fold</i> |
|--------------------|---------------|--------------------------------------------------------------------------------|----------------|----------------|---------------|
| 1415849_s_at       | Stmn1         | stathmin 1                                                                     | -6.39          | 0.00           | 0.30          |
| 1420616_at         | Ash2l         | ash2 (absent. small. or homeotic)-like (Drosophila)                            | -6.39          | 0.00           | 0.63          |
| 1448526_at         | Kpnb1         | karyopherin (importin) beta 1                                                  | -6.41          | 0.00           | 0.71          |
| 1435005_at         | Cenpe         | centromere protein E                                                           | -6.42          | 0.00           | 0.26          |
| 1439040_at         | Cenpe         | centromere protein E                                                           | -8.57          | 0.00           | 0.27          |
| 1418334_at         | Dbf4          | DBF4 homolog (S. cerevisiae)                                                   | -6.43          | 0.00           | 0.35          |
| 1416177_at         | Rbmxt         | RNA binding motif protein. X chromosome retrogene                              | -6.44          | 0.00           | 0.53          |
| 1419513_a_at       | Ect2          | ect2 oncogene                                                                  | -6.46          | 0.00           | 0.24          |
| 1436808_x_at       | Mcm5          | minichromosome maintenance deficient 5. cell division cycle 46 (S. cerevisiae) | -6.47          | 0.00           | 0.23          |
| 1415945_at         | Mcm5          | minichromosome maintenance deficient 5. cell division cycle 46 (S. cerevisiae) | -6.51          | 0.00           | 0.21          |
| 1417445_at         | Ndc80         | NDC80 homolog. kinetochore complex component (S. cerevisiae)                   | -6.47          | 0.00           | 0.27          |
| 1456475_s_at       | Prkar2b       | protein kinase. cAMP dependent regulatory. type II beta                        | -6.49          | 0.00           | 0.19          |
| 1438664_at         | Prkar2b       | protein kinase. cAMP dependent regulatory. type II beta                        | -6.62          | 0.00           | 0.20          |
| 1430640_a_at       | Prkar2b       | protein kinase. cAMP dependent regulatory. type II beta                        | -7.68          | 0.00           | 0.22          |
| 1449171_at         | Ttk           | Ttk protein kinase                                                             | -6.51          | 0.00           | 0.19          |
| 1434767_at         | C79407        | expressed sequence C79407                                                      | -6.55          | 0.00           | 0.26          |
| 1458374_at         | C79407        | expressed sequence C79407                                                      | -7.66          | 0.00           | 0.30          |
| 1434789_at         | Depdc1b       | DEP domain containing 1B                                                       | -6.56          | 0.00           | 0.32          |
| 1418027_at         | Exo1          | exonuclease 1                                                                  | -6.56          | 0.00           | 0.29          |
| 1418026_at         | Exo1          | exonuclease 1                                                                  | -6.79          | 0.00           | 0.22          |
| 1423127_at         | Impa1         | inositol (myo)-1(or 4)-monophosphatase 1                                       | -6.62          | 0.00           | 0.78          |
| 1433685_a_at       | 6430706D22Rik | RIKEN cDNA 6430706D22 gene                                                     | -6.64          | 0.00           | 0.42          |
| 1436708_x_at       | Mcm4          | minichromosome maintenance deficient 4 homolog (S. cerevisiae)                 | -6.65          | 0.00           | 0.26          |
| 1416214_at         | Mcm4          | minichromosome maintenance deficient 4 homolog (S. cerevisiae)                 | -7.49          | 0.00           | 0.28          |
| 1428232_at         | Cpsf6         | cleavage and polyadenylation specific factor 6                                 | -6.67          | 0.00           | 0.68          |
| 1428233_at         | Cpsf6         | cleavage and polyadenylation specific factor 6                                 | -6.78          | 0.00           | 0.54          |
| 1424128_x_at       | Aurkb         | aurora kinase B                                                                | -6.67          | 0.00           | 0.23          |
| 1451246_s_at       | Aurkb         | aurora kinase B                                                                | -7.44          | 0.00           | 0.28          |
| 1416118_at         | Trim59        | tripartite motif-containing 59                                                 | -6.67          | 0.00           | 0.48          |
| 1418540_a_at       | Ptpre         | protein tyrosine phosphatase. receptor type. E                                 | -6.68          | 0.00           | 0.43          |
| 1418539_a_at       | Ptpre         | protein tyrosine phosphatase. receptor type. E                                 | -7.46          | 0.00           | 0.39          |
| 1416030_a_at       | Mcm7          | minichromosome maintenance deficient 7 (S. cerevisiae)                         | -6.68          | 0.00           | 0.27          |
| 1439269_x_at       | Mcm7          | minichromosome maintenance deficient 7 (S. cerevisiae)                         | -6.70          | 0.00           | 0.29          |
| 1416031_s_at       | Mcm7          | minichromosome maintenance deficient 7 (S. cerevisiae)                         | -6.72          | 0.00           | 0.30          |
| 1438320_s_at       | Mcm7          | minichromosome maintenance deficient 7 (S. cerevisiae)                         | -6.94          | 0.00           | 0.26          |
| 1450048_a_at       | Idh2          | isocitrate dehydrogenase 2 (NADP+). mitochondrial                              | -6.69          | 0.00           | 0.33          |
| 1425142_a_at       | Hnrnpd        | heterogeneous nuclear ribonucleoprotein D                                      | -6.72          | 0.00           | 0.38          |
| 1416488_at         | Ccng2         | cyclin G2                                                                      | -6.72          | 0.00           | 0.50          |
| 1432187_at         | Nup43         | nucleoporin 43                                                                 | -6.77          | 0.00           | 0.52          |
| 1432188_s_at       | Nup43         | nucleoporin 43                                                                 | -6.94          | 0.00           | 0.51          |
| 1438015_at         | Dkc1          | dyskeratosis congenita 1. dyskerin homolog (human)                             | -6.80          | 0.00           | 0.39          |
| 1441788_s_at       | Dkc1          | dyskeratosis congenita 1. dyskerin homolog (human)                             | -7.63          | 0.00           | 0.29          |
| 1438016_at         | Dkc1          | dyskeratosis congenita 1. dyskerin homolog (human)                             | -10.07         | 0.00           | 0.33          |
| 1419270_a_at       | Dut           | deoxyuridine triphosphatase                                                    | -6.80          | 0.00           | 0.32          |
| 1452241_at         | Topbp1        | topoisomerase (DNA) II binding protein 1                                       | -6.81          | 0.00           | 0.39          |
| 1424046_at         | Bub1          | budding uninhibited by benzimidazoles 1 homolog (S. cerevisiae)                | -6.87          | 0.00           | 0.21          |
| 1416043_at         | Nasp          | nuclear autoantigenic sperm protein (histone-binding)                          | -6.90          | 0.00           | 0.30          |
| 1416042_s_at       | Nasp          | nuclear autoantigenic sperm protein (histone-binding)                          | -9.01          | 0.00           | 0.28          |
| 1416664_at         | Cdc20         | cell division cycle 20 homolog (S. cerevisiae)                                 | -6.95          | 0.00           | 0.28          |

| <i>Probeset ID</i> | <i>Symbol</i> | <i>Gene Name</i>                                          | <i>d-value</i> | <i>q-value</i> | <i>R-fold</i> |
|--------------------|---------------|-----------------------------------------------------------|----------------|----------------|---------------|
| 1439394_x_at       | Cdc20         | cell division cycle 20 homolog (S. cerevisiae)            | -7.33          | 0.00           | 0.42          |
| 1439377_x_at       | Cdc20         | cell division cycle 20 homolog (S. cerevisiae)            | -7.97          | 0.00           | 0.27          |
| 1443381_at         | Etv4          | ets variant gene 4 (E1A enhancer binding protein. E1AF)   | -6.95          | 0.00           | 0.63          |
| 1423232_at         | Etv4          | ets variant gene 4 (E1A enhancer binding protein. E1AF)   | -7.81          | 0.00           | 0.31          |
| 1424971_at         | Ccdc99        | coiled-coil domain containing 99                          | -6.96          | 0.00           | 0.29          |
| 1423813_at         | Kif22         | kinesin family member 22                                  | -6.97          | 0.00           | 0.29          |
| 1437716_x_at       | Kif22         | kinesin family member 22                                  | -7.07          | 0.00           | 0.33          |
| 1451128_s_at       | Kif22         | kinesin family member 22                                  | -7.24          | 0.00           | 0.26          |
| 1416065_a_at       | Ankrd10       | ankyrin repeat domain 10                                  | -6.99          | 0.00           | 0.51          |
| 1429304_at         | Ankrd10       | ankyrin repeat domain 10                                  | -7.59          | 0.00           | 0.53          |
| 1448199_at         | Ankrd10       | ankyrin repeat domain 10                                  | -8.30          | 0.00           | 0.49          |
| 1418827_at         | Thex1         | three prime histone mRNA exonuclease 1                    | -7.00          | 0.00           | 0.49          |
| 1418828_at         | Thex1         | three prime histone mRNA exonuclease 1                    | -7.60          | 0.00           | 0.37          |
| 1423920_at         | Ncaph         | non-SMC condensin I complex. subunit H                    | -7.05          | 0.00           | 0.35          |
| 1436707_x_at       | Ncaph         | non-SMC condensin I complex. subunit H                    | -7.37          | 0.00           | 0.32          |
| 1418369_at         | Prim1         | DNA primase. p49 subunit                                  | -7.09          | 0.00           | 0.27          |
| 1449061_a_at       | Prim1         | DNA primase. p49 subunit                                  | -7.25          | 0.00           | 0.25          |
| 1436942_at         | A930035D04Rik | RIKEN cDNA A930035D04 gene                                | -7.10          | 0.00           | 0.47          |
| 1427321_s_at       | Cxadr         | coxsackievirus and adenovirus receptor                    | -7.10          | 0.00           | 0.42          |
| 1453282_at         | Cxadr         | coxsackievirus and adenovirus receptor                    | -13.46         | 0.00           | 0.21          |
| 1416258_at         | Tk1           | thymidine kinase 1                                        | -7.10          | 0.00           | 0.23          |
| 1428069_at         | Cdca7         | cell division cycle associated 7                          | -7.13          | 0.00           | 0.27          |
| 1417019_a_at       | Cdc6          | cell division cycle 6 homolog (S. cerevisiae)             | -7.17          | 0.00           | 0.20          |
| 1452151_at         | Gramd4        | GRAM domain containing 4                                  | -7.17          | 0.00           | 0.51          |
| 1454011_a_at       | Rpa2          | replication protein A2                                    | -7.17          | 0.00           | 0.42          |
| 1416433_at         | Rpa2          | replication protein A2                                    | -8.66          | 0.00           | 0.41          |
| 1453064_at         | Etaa1         | Ewing's tumor-associated antigen 1                        | -7.18          | 0.00           | 0.37          |
| 1416073_a_at       | Pcnt          | pericentrin (kendrin)                                     | -7.18          | 0.00           | 0.54          |
| 1427911_at         | Tmem173       | transmembrane protein 173                                 | -7.21          | 0.00           | 0.51          |
| 1447621_s_at       | Tmem173       | transmembrane protein 173                                 | -10.97         | 0.00           | 0.32          |
| 1456326_at         | Gm784         | gene model 784. (NCBI)                                    | -7.24          | 0.00           | 0.25          |
| 1455488_at         | 6230416J20Rik | RIKEN cDNA 6230416J20 gene                                | -7.26          | 0.00           | 0.31          |
| 1429665_at         | 6230416J20Rik | RIKEN cDNA 6230416J20 gene                                | -7.67          | 0.00           | 0.49          |
| 1440227_at         | Slc5a3        | solute carrier family 5 (inositol transporters). member 3 | -7.33          | 0.00           | 0.31          |
| 1447585_s_at       | Slc5a3        | solute carrier family 5 (inositol transporters). member 3 | -8.49          | 0.00           | 0.41          |
| 1435484_at         | Slc5a3        | solute carrier family 5 (inositol transporters). member 3 | -9.84          | 0.00           | 0.24          |
| 1436512_at         | Arl4c         | ADP-ribosylation factor-like 4C                           | -7.36          | 0.00           | 0.32          |
| 1454788_at         | Arl4c         | ADP-ribosylation factor-like 4C                           | -11.02         | 0.00           | 0.34          |
| 1416558_at         | Melk          | maternal embryonic leucine zipper kinase                  | -7.38          | 0.00           | 0.23          |
| 1428061_at         | Hat1          | histone aminotransferase 1                                | -7.46          | 0.00           | 0.36          |
| 1452598_at         | Gins1         | GINS complex subunit 1 (Psf1 homolog)                     | -7.48          | 0.00           | 0.27          |
| 1442095_at         | Asxl3         | additional sex combs like 3 (Drosophila)                  | -7.50          | 0.00           | 0.38          |
| 1435892_at         | Asxl3         | additional sex combs like 3 (Drosophila)                  | -7.59          | 0.00           | 0.43          |
| 1416698_a_at       | Cks1b         | CDC28 protein kinase 1b                                   | -7.52          | 0.00           | 0.55          |
| 1448441_at         | Cks1b         | CDC28 protein kinase 1b                                   | -7.89          | 0.00           | 0.43          |
| 1417821_at         | D17H6S56E-5   | DNA segment. Chr 17. human D6S56E 5                       | -7.53          | 0.00           | 0.20          |
| 1417822_at         | D17H6S56E-5   | DNA segment. Chr 17. human D6S56E 5                       | -8.93          | 0.00           | 0.24          |
| 1423847_at         | Ncapd2        | non-SMC condensin I complex. subunit D2                   | -7.66          | 0.00           | 0.26          |
| 1422430_at         | Figl1         | fidgetin-like 1                                           | -7.69          | 0.00           | 0.27          |

| <i>Probeset ID</i> | <i>Symbol</i>      | <i>Gene Name</i>                                                             | <i>d-value</i> | <i>q-value</i> | <i>R-fold</i> |
|--------------------|--------------------|------------------------------------------------------------------------------|----------------|----------------|---------------|
| 1423714_at         | Asf1b              | ASF1 anti-silencing function 1 homolog B ( <i>S. cerevisiae</i> )            | -7.76          | 0.00           | 0.39          |
| 1451105_at         | Vash2              | vasohibin 2                                                                  | -7.79          | 0.00           | 0.30          |
| 1424144_at         | Cdt1               | chromatin licensing and DNA replication factor 1                             | -7.79          | 0.00           | 0.21          |
| 1424143_a_at       | Cdt1               | chromatin licensing and DNA replication factor 1                             | -8.20          | 0.00           | 0.23          |
| 1416155_at         | Hmgb3              | high mobility group box 3                                                    | -7.81          | 0.00           | 0.33          |
| 1450886_at         | Gsg2               | germ cell-specific gene 2                                                    | -7.84          | 0.00           | 0.25          |
| 1418281_at         | Rad51              | RAD51 homolog ( <i>S. cerevisiae</i> )                                       | -7.89          | 0.00           | 0.28          |
| 1451323_at         | Zfp7               | zinc finger protein 7                                                        | -8.07          | 0.00           | 0.32          |
| 1448314_at         | Cdc2a              | cell division cycle 2 homolog A ( <i>S. pombe</i> )                          | -8.10          | 0.00           | 0.32          |
| 1418678_at         | Has2               | hyaluronan synthase 2                                                        | -8.11          | 0.00           | 0.06          |
| 1449169_at         | Has2               | hyaluronan synthase 2                                                        | -8.18          | 0.00           | 0.08          |
| 1433567_at         | Gmps               | guanine monphosphate synthetase                                              | -8.32          | 0.00           | 0.57          |
| 1438434_at         | Arhgap11a          | Rho GTPase activating protein 11A                                            | -8.77          | 0.00           | 0.31          |
| 1422243_at         | Fgf7               | fibroblast growth factor 7                                                   | -8.81          | 0.00           | 0.17          |
| 1438405_at         | Fgf7               | fibroblast growth factor 7                                                   | -10.53         | 0.00           | 0.15          |
| 1449839_at         | Casp3              | caspase 3                                                                    | -8.96          | 0.00           | 0.49          |
| 1423455_at         | ENSMUSG00000068659 | predicted gene. ENSMUSG00000068659                                           | -9.08          | 0.00           | 0.57          |
| 1437313_x_at       | Hmgb2              | high mobility group box 2                                                    | -9.09          | 0.00           | 0.21          |
| 1452534_a_at       | Hmgb2              | high mobility group box 2                                                    | -10.42         | 0.00           | 0.16          |
| 1421534_at         | LOC14210           | hypothetical LOC14210                                                        | -9.10          | 0.00           | 0.31          |
| 1455990_at         | Kif23              | kinesin family member 23                                                     | -9.11          | 0.00           | 0.25          |
| 1453748_a_at       | Kif23              | kinesin family member 23                                                     | -9.89          | 0.00           | 0.22          |
| 1456531_x_at       | Prpf19             | PRP19/PSO4 pre-mRNA processing factor 19 homolog ( <i>S. cerevisiae</i> )    | -9.20          | 0.00           | 0.59          |
| 1426473_at         | Dnajc9             | DnaJ (Hsp40) homolog. subfamily C. member 9                                  | -9.55          | 0.00           | 0.38          |
| 1453366_at         | Tdrkh              | tudor and KH domain containing protein                                       | -9.76          | 0.00           | 0.20          |
| 1460168_at         | Slbp               | stem-loop binding protein                                                    | -10.05         | 0.00           | 0.40          |
| 1434258_s_at       | Phactr4            | phosphatase and actin regulator 4                                            | -10.06         | 0.00           | 0.55          |
| 1454659_at         | Dctd               | dCMP deaminase                                                               | -10.16         | 0.00           | 0.34          |
| 1434660_at         | Alkbh1             | alkB. alkylation repair homolog 1 ( <i>E. coli</i> )                         | -11.02         | 0.00           | 0.63          |
| 1417155_at         | Mycn               | v-myc myelocytomatosis viral related oncogene. neuroblastoma derived (avian) | -12.54         | 0.00           | 0.17          |
| 1415834_at         | Dusp6              | dual specificity phosphatase 6                                               | -16.40         | 0.00           | 0.09          |
