# Supplementary material for: Reversible, interrelated mRNA and miRNA expression patterns in the transcriptome of Rasless fibroblasts: functional and mechanistic implications
Source: PubMed Central journal article supplement (PMC4007593; doi:10.1186/1471-2164-14-731), 2013-10-25
Supplement: 1471-2164-14-731-S5.pdf [file 1471-2164-14-731-S5.pdf]

**Table S5. Functional annotation of differentially expressed, repressed (S5A) and induced (S5B) genes of Rasless MEFs whose transcriptional pattern is reversed in both BRAF- and MEK1-rescued MEFs.**

The GeneCodis (Gene Annotation Co-occurrence Discovery) functional annotation tool (<http://genecodis.dacya.ucm.es>) was used to identify statistically significant functional associations linking particular gene subsets contained within the list of Rasless repressed (S5A) or induced (S5B) loci included in Table S4 (Additional file 4, FDR=0.01) to specific Biological Processes from the *Gene Ontology* (GO) database. The column labelled “*Functional category*” identifies the specific functional GO term recognized in each case for the corresponding groups of loci listed under the column labelled “*Genes*”. GO terms descriptions falling under the same, high level, general functional categories (Cell Cycle, DNA and RNA processing, Metabolite processing, DNA damage response, etc) are depicted with distinct, common colors. The column labelled “*Number of Genes*” indicates the specific number of genes linked to the indicated functionality, out of the total number (in parenthesis) of genes recognized by GeneCodis in the list of repressed genes of Rasless cells. The column labeled “*Corrected p-value*” refers to the statistical significance of the functional associations identified, and contains p-values calculated cases using the Hypergeometric Distribution and subsequently corrected by implementing the False Discovery Rate method of Benjamini and Hochberg [113].

**S5A. Functional annotation of repressed genes from Rasless MEFs that are induced in both BRAF- and MEK1-rescued MEFs**

| <i>Functional Category</i>                                    | <i>Number of Genes</i> | <i>Corrected p-value</i> | <i>Genes repressed in Table S4</i>                                                                                                                                                                                                                                                                                                                                                                                                                                                                                      |
|---------------------------------------------------------------|------------------------|--------------------------|-------------------------------------------------------------------------------------------------------------------------------------------------------------------------------------------------------------------------------------------------------------------------------------------------------------------------------------------------------------------------------------------------------------------------------------------------------------------------------------------------------------------------|
| <b>CELL CYCLE (MITOTIC AND MEIOTIC DIVISION)</b>              |                        |                          |                                                                                                                                                                                                                                                                                                                                                                                                                                                                                                                         |
| GO:0007049: cell cycle                                        | 73(314)                | 2,20E-65                 | Ncaph, Timeless, Ercc6l, Mcm5, Cks1b, Plk1, Sasp6, Aurkb, Kif11, Bub1, Ndc80, Aspm, Mad2l1, Cdc5l, Dscc1, Cit, Mcm4, Brca1, Mcm3, Rad21, Dlgap5, Sgol1, Ccdc99, Ncapd2, Ccnb2, Cdc25c, Casc5, Lig1, Ncapd3, Kntc1, Rbbp4, Gsg2, Ccng2, Nasp, Chek1, Pttg1, Usp3, Ccna2, Cdc7, Hmga2, Bub1b, Dbf4, Zwilch, Cdca3, Cdc20, Kif2c, Clspn, Cenpe, Tipin, Chtf18, Mcm7, Mastl, Cdkn2c, Prc1, Cdc6, Pkmyt1, Mcm2, Cep55, E2f7, Mcm6, C79407, Fancd2, Nek2, Cdca8, Incenp, Khdrbs1, Nup43, Rbl1, Terf1, Uhrf1, Cdt1, Cks2, Pogz |
| GO:0051301: cell division                                     | 48(314)                | 3,06E-45                 | Ncaph, Timeless, Ercc6l, Mcm5, Cks1b, Plk1, Aurkb, Kif11, Bub1, Ndc80, Aspm, Mad2l1, Cit, Rad21, Sgol1, Ccdc99, Ncapd2, Ccnb2, Cdc25c, Casc5, Lig1, Ncapd3, Kntc1, Ccng2, Pttg1, Ccna2, Cdc7, Hmga2, Bub1b, Zwilch, Cdca3, Cdc20, Kif2c, Cenpe, Tipin, Mastl, Prc1, Cdc6, Cep55, C79407, Nek2, Cdca8, Incenp, Nup43, Cdca7, Terf1, Cks2, Pogz                                                                                                                                                                           |
| GO:0007067: mitosis                                           | 40(314)                | 4,62E-40                 | Ncaph, Timeless, Ercc6l, Plk1, Aurkb, Kif11, Bub1, Ndc80, Aspm, Mad2l1, Cit, Rad21, Sgol1, Ccdc99, Ncapd2, Ccnb2, Cdc25c, Casc5, Ncapd3, Kntc1, Ccng2, Pttg1, Ccna2, Hmga2, Bub1b, Zwilch, Cdca3, Cdc20, Kif2c, Cenpe, Tipin, Mastl, Cdc6, Cep55, C79407, Nek2, Cdca8, Incenp, Nup43, Terf1                                                                                                                                                                                                                             |
| GO:0007059: chromosome segregation                            | 16(314)                | 7,11E-18                 | Srpk1, Bub1, Ndc80, Ctf, Brca1, Rad21, Sgol1, Casc5, Esp1, Pttg1, Top2a, Kif2c, Cenpf, Nek2, Incenp, Nup43                                                                                                                                                                                                                                                                                                                                                                                                              |
| GO:0033261: regulation of S phase                             | 5(314)                 | 4,65E-08                 | Timeless, Slbp, Chek1, Cdc7, Tipin                                                                                                                                                                                                                                                                                                                                                                                                                                                                                      |
| GO:0051726: regulation of cell cycle                          | 10(314)                | 9,42E-08                 | Skp2, Ccnb2, Dtl, Zfp703, Ccng2, Ccna2, Mastl, Tacc3, Figl1, Rbl1                                                                                                                                                                                                                                                                                                                                                                                                                                                       |
| GO:0007076: mitotic chromosome condensation                   | 5(314)                 | 8,05E-07                 | Ncaph, Ncapd2, Ncapd3, Ncapg, Akap8                                                                                                                                                                                                                                                                                                                                                                                                                                                                                     |
| GO:0008608: attachment of spindle microtubules to kinetochore | 4(314)                 | 3,05E-06                 | Ndc80, Sgol1, Casc5, Cenpe                                                                                                                                                                                                                                                                                                                                                                                                                                                                                              |
| GO:0000070: mitotic sister chromatid segregation              | 4(314)                 | 1,29E-05                 | Mad2l1, Cit, Esp1, Nek2                                                                                                                                                                                                                                                                                                                                                                                                                                                                                                 |
| GO:0000076: DNA replication checkpoint                        | 3(314)                 | 7,90E-05                 | Clspn, Tipin, Cdt1                                                                                                                                                                                                                                                                                                                                                                                                                                                                                                      |
| GO:0000087: M phase of mitotic cell cycle                     | 3(314)                 | 7,90E-05                 | Dlgap5, Cdc25c, Cenpf                                                                                                                                                                                                                                                                                                                                                                                                                                                                                                   |
| GO:0007131: reciprocal meiotic recombination                  | 4(314)                 | 0,000185328              | Msh6, Trip13, Topbp1, Rad51                                                                                                                                                                                                                                                                                                                                                                                                                                                                                             |
| GO:0000086: G2/M transition of mitotic cell cycle             | 4(314)                 | 0,000429187              | Skp2, Cit, Chek1, Mastl                                                                                                                                                                                                                                                                                                                                                                                                                                                                                                 |
| GO:0051298: centrosome duplication                            | 3(314)                 | 0,000481823              | Sasp6, Brca1, 6330503K22Rik                                                                                                                                                                                                                                                                                                                                                                                                                                                                                             |
| GO:0000132: establishment of mitotic                          | 3(314)                 | 0,000727738              | Ndc80, Ccdc99, Cenpa                                                                                                                                                                                                                                                                                                                                                                                                                                                                                                    |

| <i>Functional Category</i>                                               | <i>Number of Genes</i> | <i>Corrected p-value</i> | <i>Genes repressed in Table S4</i> |
|--------------------------------------------------------------------------|------------------------|--------------------------|------------------------------------|
| <b>spindle orientation</b>                                               |                        |                          |                                    |
| GO:0007094: mitotic cell cycle spindle assembly checkpoint               | 3(314)                 | 0,00105825               | Mad2l1, Cenpe, Terf1               |
| GO:0090007: regulation of mitotic anaphase                               | 2(314)                 | 0,00134703               | Plk1, Cdc6                         |
| GO:0051984: positive regulation of chromosome segregation                | 2(314)                 | 0,00134703               | Cenpe, Cdc6                        |
| GO:0007093: mitotic cell cycle checkpoint                                | 3(314)                 | 0,0013998                | Mad2l1, Kntc1, Zwilch              |
| GO:0007126: meiosis                                                      | 5(314)                 | 0,00332418               | Mki67, Exo1, Psmc3ip, Nek2, Rad51  |
| GO:0071173: spindle assembly checkpoint                                  | 2(314)                 | 0,00337246               | Bub1, Casc5                        |
| GO:0000910: cytokinesis                                                  | 4(314)                 | 0,00337984               | Aurkb, Cit, Prc1, Incenp           |
| GO:0007127: meiosis I                                                    | 2(314)                 | 0,00552327               | Esp1, Cks2                         |
| GO:0051983: regulation of chromosome segregation                         | 2(314)                 | 0,00552327               | Bub1, Kif2c                        |
| GO:0007091: mitotic metaphase/anaphase transition                        | 2(314)                 | 0,00552327               | Cit, Bub1b                         |
| GO:0045143: homologous chromosome segregation                            | 2(314)                 | 0,00552327               | Esp1, Pttg1                        |
| GO:0000089: mitotic metaphase                                            | 2(314)                 | 0,00797998               | Ndc80, Cdca8                       |
| GO:0007099: centriole replication                                        | 2(314)                 | 0,0105499                | Sass6, 6330503K22Rik               |
| GO:0010389: regulation of G2/M transition of mitotic cell cycle          | 2(314)                 | 0,0137492                | Ccnb2, Cenpf                       |
| GO:0007051: spindle organization                                         | 2(314)                 | 0,0163194                | Kif11, Pcnt                        |
| GO:0007090: regulation of S phase of mitotic cell cycle                  | 2(314)                 | 0,0163194                | Dbf4, Cdt1                         |
| GO:0007052: mitotic spindle organization                                 | 2(314)                 | 0,0163194                | Ndc80, Stmn1                       |
| GO:0045070: positive regulation of viral genome replication              | 2(314)                 | 0,0163194                | Srpk1, Top2a                       |
| GO:0000079: regulation of cyclin-dependent protein kinase activity       | 3(314)                 | 0,0173269                | Ccnb2, Ccna2, Cdkn2c               |
| GO:0000084: S phase of mitotic cell cycle                                | 2(314)                 | 0,0234741                | Pold1, Ezh2                        |
| GO:0000278: mitotic cell cycle                                           | 2(314)                 | 0,0278102                | Usp3, Cenpf                        |
| GO:0071777: positive regulation of cell cycle cytokinesis                | 1(314)                 | 0,038985                 | Cdc6                               |
| GO:0051310: metaphase plate congression                                  | 1(314)                 | 0,038985                 | Cenpf                              |
| GO:0033314: mitotic cell cycle DNA replication checkpoint                | 1(314)                 | 0,038985                 | Clspn                              |
| GO:0045870: positive regulation of retroviral genome replication         | 1(314)                 | 0,038985                 | Top2a                              |
| GO:0033260: DNA replication involved in S phase                          | 1(314)                 | 0,038985                 | Slbp                               |
| GO:0045841: negative regulation of mitotic metaphase/anaphase transition | 1(314)                 | 0,038985                 | Mad2l1                             |
| GO:0045769: negative regulation of asymmetric cell division              | 1(314)                 | 0,038985                 | Aspm                               |
| GO:0007063: regulation of sister chromatid cohesion                      | 1(314)                 | 0,038985                 | Bub1                               |
| GO:0007100: mitotic centrosome separation                                | 1(314)                 | 0,038985                 | Kif11                              |
| GO:0090307: spindle assembly involved in mitosis                         | 1(314)                 | 0,038985                 | Kif11                              |
| GO:0046601: positive regulation of centriole replication                 | 1(314)                 | 0,038985                 | Plk4                               |
| GO:0000082: G1/S transition of mitotic cell cycle                        | 3(314)                 | 0,0400578                | Skp2, Iqgap3, Cdkn2c               |
| GO:0045736: negative regulation of                                       | 2(314)                 | 0,0494391                | Plk1, Casp3                        |

| <i>Functional Category</i>                                                              | <i>Number of Genes</i> | <i>Corrected p-value</i> | <i>Genes repressed in Table S4</i>                                                                                                                                                                                                                                                                                                                                                              |
|-----------------------------------------------------------------------------------------|------------------------|--------------------------|-------------------------------------------------------------------------------------------------------------------------------------------------------------------------------------------------------------------------------------------------------------------------------------------------------------------------------------------------------------------------------------------------|
| <b>cyclin-dependent protein kinase activity</b>                                         |                        |                          |                                                                                                                                                                                                                                                                                                                                                                                                 |
| <b>DNA AND RNA PROCESSING</b>                                                           |                        |                          |                                                                                                                                                                                                                                                                                                                                                                                                 |
| <b>GO:0006260: DNA replication</b>                                                      | 32(314)                | 7,49E-35                 | Mcm5, Pole2, Rbbp7, Dscc1, Mcm4, Prim1, Sin3a, Brca1, Mcm3, Gins1, Dtl, Supt16h, Cdc25c, Lig1, Rbbp4, Nasp, Chek1, Cdc7, Rpa2, Tk1, Dbf4, Rfc5, Clspn, Chtf18, Mcm7, Cdc6, Mcm2, Ssrp1, Pold1, Mcm6, Rfc4, Cdt1                                                                                                                                                                                 |
| <b>GO:0006355: regulation of transcription, DNA-dependent</b>                           | 54(314)                | 3,08E-14                 | Nono, Cdca7l, Timeless, Sirt1, Whsc1, Mybbp1a, Kat2a, Paxip1, Med13l, Zfp57, Dnmt1, Rbbp7, Cdc5l, Ctcf, Sin3a, Hnrnpd, Cand1, Asxl3, Ash2l, Trim28, Supt16h, Six4, Zfp217, Zfp703, Rbbp4, Ewsr1, Sf1, Asf1b, Asxl1, Hmga2, Tead2, Top2a, Patz1, Mlf1ip, Actl6a, Ilf3, Mycn, Ssrp1, E2f7, C79407, Etv4, Whsc2, Apex1, Khdrbs1, Cdca7, Ezh2, Tmpo, Rbl1, Terf1, Uhrf1, Tfam, Smarcc1, Hnrpd, Pogz |
| <b>GO:0008380: RNA splicing</b>                                                         | 22(314)                | 4,38E-14                 | Nono, Rbmxt, Cpsf2, Prpf19, Hnrnpc, Srpk1, Cdc5l, Hnrnpu, Rnps1, Hnrnpd, Cstf2, Polr2b, Sf1, Sf3a1, Snw1, Hnrnpa2b1, Snrpg, Nudt21, Gemin8, Syncrip, Zrsr2, Zcchc8                                                                                                                                                                                                                              |
| <b>GO:0006397: mRNA processing</b>                                                      | 21(314)                | 8,88E-13                 | Nono, Rbmxt, Cpsf2, Prpf19, Cpsf6, Hnrnpc, Srpk1, Cdc5l, Hnrnpu, Rnps1, Cstf2, Sf1, Sf3a1, Slbp, Snw1, Hnrnpa2b1, Nudt21, Gemin8, Syncrip, Zrsr2, Zcchc8                                                                                                                                                                                                                                        |
| <b>GO:0006351: transcription, DNA-dependent</b>                                         | 49(314)                | 1,73E-12                 | Nono, Cdca7l, Timeless, Sirt1, Whsc1, Mybbp1a, Kat2a, Paxip1, Med13l, Zfp57, Dnmt1, Rbbp7, Cdc5l, Ctcf, Prim1, Sin3a, Hnrnpd, Cand1, Asxl3, Ash2l, Trim28, Supt16h, Rbbp4, Polr2b, Ewsr1, Sf1, Hmgb1, Asf1b, Asxl1, Hmga2, Hmgb2, Tead2, Mlf1ip, Actl6a, Polr3b, Ilf3, Ssrp1, E2f7, Etv4, Whsc2, Apex1, Khdrbs1, Cdca7, Ezh2, Rbl1, Uhrf1, Tfam, Smarcc1, Hnrpd                                 |
| <b>GO:0006310: DNA recombination</b>                                                    | 11(314)                | 7,33E-11                 | Nono, Paxip1, Brca1, Exo1, Psmc3ip, Lig1, Recq14, Rpa2, Rad51ap1, Apex1, Rad51                                                                                                                                                                                                                                                                                                                  |
| <b>GO:0006270: DNA-dependent DNA replication initiation</b>                             | 6(314)                 | 1,10E-08                 | Mcm5, Mcm4, Mcm3, Mcm7, Mcm2, Mcm6                                                                                                                                                                                                                                                                                                                                                              |
| <b>GO:0045892: negative regulation of transcription, DNA-dependent</b>                  | 17(314)                | 2,47E-08                 | Timeless, Sirt1, Cbx5, Mybbp1a, Dnmt1, Ctcf, Sin3a, Brca1, Trim28, Zfp703, Cbx3, Snw1, Hmgb2, Cenpf, Patz1, Ilf3, Khdrbs1                                                                                                                                                                                                                                                                       |
| <b>GO:0006268: DNA unwinding involved in replication</b>                                | 5(314)                 | 4,65E-08                 | Mcm4, Mcm7, Mcm2, Mcm6, Rad51                                                                                                                                                                                                                                                                                                                                                                   |
| <b>GO:0006164: purine nucleotide biosynthetic process</b>                               | 4(314)                 | 0,000185328              | Impdh2, Mthfd1, Adsl, Gmps                                                                                                                                                                                                                                                                                                                                                                      |
| <b>GO:0007004: telomere maintenance via telomerase</b>                                  | 3(314)                 | 0,0013998                | Dkc1, Ptges3, Terf1                                                                                                                                                                                                                                                                                                                                                                             |
| <b>GO:0006261: DNA-dependent DNA replication</b>                                        | 3(314)                 | 0,00222991               | Pole2, Top2a, Pold1                                                                                                                                                                                                                                                                                                                                                                             |
| <b>GO:0010216: maintenance of DNA methylation</b>                                       | 2(314)                 | 0,00337246               | Dnmt1, Ctcf                                                                                                                                                                                                                                                                                                                                                                                     |
| <b>GO:0006177: GMP biosynthetic process</b>                                             | 2(314)                 | 0,00337246               | Impdh2, Gmps                                                                                                                                                                                                                                                                                                                                                                                    |
| <b>GO:0006306: DNA methylation</b>                                                      | 3(314)                 | 0,00453625               | Dnmt1, Ctcf, Mbd4                                                                                                                                                                                                                                                                                                                                                                               |
| <b>GO:0009168: purine ribonucleoside monophosphate biosynthetic process</b>             | 3(314)                 | 0,00453625               | Impdh2, Adsl, Gmps                                                                                                                                                                                                                                                                                                                                                                              |
| <b>GO:0050684: regulation of mRNA processing</b>                                        | 2(314)                 | 0,00552327               | Srpk1, Safb                                                                                                                                                                                                                                                                                                                                                                                     |
| <b>GO:0051571: positive regulation of histone H3-K4 methylation</b>                     | 2(314)                 | 0,00552327               | Paxip1, Dnmt1                                                                                                                                                                                                                                                                                                                                                                                   |
| <b>GO:0000122: negative regulation of transcription from RNA polymerase II promoter</b> | 9(314)                 | 0,00778043               | Sirt1, Whsc1, Zfp57, Rbbp7, Sin3a, Trim28, Hmgb1, Hmga2, Rbl1                                                                                                                                                                                                                                                                                                                                   |
| <b>GO:0006398: histone mRNA 3'-end processing</b>                                       | 2(314)                 | 0,00797998               | Cpsf2, Slbp                                                                                                                                                                                                                                                                                                                                                                                     |
| <b>GO:0070934: CRD-mediated mRNA stabilization</b>                                      | 2(314)                 | 0,00797998               | Hnrnpu, Syncrip                                                                                                                                                                                                                                                                                                                                                                                 |
| <b>GO:0009048: dosage compensation, by inactivation of X chromosome</b>                 | 2(314)                 | 0,00797998               | Ctcf, Brca1                                                                                                                                                                                                                                                                                                                                                                                     |
| <b>GO:0006396: RNA processing</b>                                                       | 4(314)                 | 0,00946223               | Dkc1, Exosc8, Larp7, Sf3a1                                                                                                                                                                                                                                                                                                                                                                      |
| <b>GO:0006266: DNA ligation</b>                                                         | 2(314)                 | 0,0105499                | Lig1, Top2a                                                                                                                                                                                                                                                                                                                                                                                     |
| <b>GO:0006259: DNA metabolic process</b>                                                | 3(314)                 | 0,0106837                | Pttg1, Top2a, Rad51                                                                                                                                                                                                                                                                                                                                                                             |
| <b>GO:0000398: nuclear mRNA splicing, via spliceosome</b>                               | 3(314)                 | 0,0154716                | Sf3a1, Snw1, Zrsr2                                                                                                                                                                                                                                                                                                                                                                              |
| <b>GO:0043488: regulation of mRNA</b>                                                   | 2(314)                 | 0,0202844                | Hnrnpd, Apex1                                                                                                                                                                                                                                                                                                                                                                                   |

| <i>Functional Category</i>                                                              | <i>Number of Genes</i> | <i>Corrected p-value</i> | <i>Genes repressed in Table S4</i>                                                                                                                 |
|-----------------------------------------------------------------------------------------|------------------------|--------------------------|----------------------------------------------------------------------------------------------------------------------------------------------------|
| <b>stability</b>                                                                        |                        |                          |                                                                                                                                                    |
| <b>GO:0045893: positive regulation of transcription, DNA-dependent</b>                  | 9(314)                 | 0,0234362                | Ctcf, Trim28, Six4, Ccna2, Hmgb2, Ilf3, Etv4, Tfam, Smarcc1                                                                                        |
| <b>GO:0006349: regulation of gene expression by genetic imprinting</b>                  | 2(314)                 | 0,0278102                | Zfp57, Ctcf                                                                                                                                        |
| <b>GO:0016578: histone deubiquitination</b>                                             | 2(314)                 | 0,0308515                | Kat2a, Usp3                                                                                                                                        |
| <b>GO:0016180: snRNA processing</b>                                                     | 2(314)                 | 0,0308515                | Ints5, Ints7                                                                                                                                       |
| <b>GO:0051106: positive regulation of DNA ligation</b>                                  | 1(314)                 | 0,038985                 | Rad51                                                                                                                                              |
| <b>GO:0006348: chromatin silencing at telomere</b>                                      | 1(314)                 | 0,038985                 | Hat1                                                                                                                                               |
| <b>GO:0009152: purine ribonucleotide biosynthetic process</b>                           | 1(314)                 | 0,038985                 | Adsl                                                                                                                                               |
| <b>GO:0046104: thymidine metabolic process</b>                                          | 1(314)                 | 0,038985                 | Tk1                                                                                                                                                |
| <b>GO:0032075: positive regulation of nuclease activity</b>                             | 1(314)                 | 0,038985                 | Hmgb2                                                                                                                                              |
| <b>GO:0000105: histidine biosynthetic process</b>                                       | 1(314)                 | 0,038985                 | Mthfd1                                                                                                                                             |
| <b>GO:0031060: regulation of histone methylation</b>                                    | 1(314)                 | 0,038985                 | Ctcf                                                                                                                                               |
| <b>GO:0000416: positive regulation of histone H3-K36 methylation</b>                    | 1(314)                 | 0,038985                 | Paxip1                                                                                                                                             |
| <b>GO:0031937: positive regulation of chromatin silencing</b>                           | 1(314)                 | 0,038985                 | Sirt1                                                                                                                                              |
| <b>GO:0006343: establishment of chromatin silencing</b>                                 | 1(314)                 | 0,038985                 | Sirt1                                                                                                                                              |
| <b>GO:0006378: mRNA polyadenylation</b>                                                 | 2(314)                 | 0,0395876                | Cpsf6, Nudt21                                                                                                                                      |
| <b>GO:0051568: histone H3-K4 methylation</b>                                            | 2(314)                 | 0,0395876                | Paxip1, Ash2l                                                                                                                                      |
| <b>GO:0032259: methylation</b>                                                          | 5(314)                 | 0,0397787                | Whsc1, Dnmt1, Tyw3, Emg1, Ezh2                                                                                                                     |
| <b>GO:0045944: positive regulation of transcription from RNA polymerase II promoter</b> | 10(314)                | 0,0401959                | Psmc3ip, Six4, Hmgb1, Snw1, Hmgb2, Tead2, Top2a, Rbm14, Cenpk, Smarcc1                                                                             |
| <b>GO:0006364: rRNA processing</b>                                                      | 4(314)                 | 0,0419854                | Sirt1, Dkc1, Exosc8, Emg1                                                                                                                          |
| <b>GO:0043388: positive regulation of DNA binding</b>                                   | 2(314)                 | 0,0447025                | Hmgb1, Hmgb2                                                                                                                                       |
| <b>GO:0008156: negative regulation of DNA replication</b>                               | 2(314)                 | 0,0491857                | Hmgb1, Terf1                                                                                                                                       |
| <b>GO:0016575: histone deacetylation</b>                                                | 2(314)                 | 0,0494391                | Sirt1, Rbm14                                                                                                                                       |
| <b><u>METABOLITE PROCESSING (PROTEIN, CARBOHYDRATE AND LIPID PROCESSING)</u></b>        |                        |                          |                                                                                                                                                    |
| <b>GO:0006468: protein phosphorylation</b>                                              | 22(314)                | 1,36E-07                 | Prkar2b, Plk4, Plk1, Aurkb, Srpk1, Bub1, Ptpre, Vrk3, Cit, Trim28, Gsg2, Chek1, Cdc7, Prkd1, Bub1b, Melk, Prkg2, Mastl, Ttk, Pkmyt1, Abl2, Nek2    |
| <b>GO:0016310: phosphorylation</b>                                                      | 21(314)                | 1,46E-05                 | Skp2, Plk4, Plk1, Srpk1, Bub1, Cit, Gsg2, Chek1, Cdc7, Bub1b, Tk1, Dbf4, Melk, Mastl, Cdkn2c, Ttk, Pkmyt1, Akap8, Abl2, Nek2, Cks2                 |
| <b>GO:0009060: aerobic respiration</b>                                                  | 2(314)                 | 0,0105499                | Fxn, Adsl                                                                                                                                          |
| <b>GO:0046855: inositol phosphate dephosphorylation</b>                                 | 2(314)                 | 0,0105499                | Synj2, Impa1                                                                                                                                       |
| <b>GO:0042325: regulation of phosphorylation</b>                                        | 3(314)                 | 0,0131104                | Prkar2b, Cd24a, Mcm7                                                                                                                               |
| <b>GO:0006020: inositol metabolic process</b>                                           | 2(314)                 | 0,0137492                | Slc5a3, Impa1                                                                                                                                      |
| <b>GO:0051353: positive regulation of oxidoreductase activity</b>                       | 2(314)                 | 0,0163194                | Fxn, Abl2                                                                                                                                          |
| <b>GO:0010722: regulation of ferrochelatase activity</b>                                | 1(314)                 | 0,038985                 | Fxn                                                                                                                                                |
| <b>GO:0016567: protein ubiquitination</b>                                               | 5(314)                 | 0,0406218                | Rfwd3, Plk1, Prpf19, Brca1, Cand1                                                                                                                  |
| <b>GO:0000209: protein polyubiquitination</b>                                           | 3(314)                 | 0,0446759                | Skp2, Prpf19, Dtl                                                                                                                                  |
| <b><u>DNA DAMAGE RESPONSE</u></b>                                                       |                        |                          |                                                                                                                                                    |
| <b>GO:0006974: response to DNA damage stimulus</b>                                      | 36(314)                | 4,90E-29                 | Nono, Timeless, Sirt1, Rfwd3, Prpf19, Paxip1, Msh6, Casp3, Brca1, Rad21, Usp1, Ash2l, Exo1, Dtl, Supt16h, Lig1, Rad54l, Chek1, Pttg1, Usp3, Top2a, |

| <i>Functional Category</i>                                         | <i>Number of Genes</i> | <i>Corrected p-value</i> | <i>Genes repressed in Table S4</i>                                                                                                                                                                                                                                                                                        |
|--------------------------------------------------------------------|------------------------|--------------------------|---------------------------------------------------------------------------------------------------------------------------------------------------------------------------------------------------------------------------------------------------------------------------------------------------------------------------|
| GO:0006281: DNA repair                                             | 29(314)                | 9,92E-23                 | Rpa2, Mbd4, Clspn, Tipin, Apitd1, Mcm7, Topbp1, Rad51ap1, Ssrp1, Fancd2, Alkbh1, Gen1, Apex1, Rad51, Uhrf1<br>Nono, Rfd3, Prpf19, Paxip1, Msh6, Brca1, Rad21, Usp1, Exo1, Supt16h, Lig1, Rad54l, Chek1, Pttg1, Usp3, Rpa2, Mbd4, Clspn, Kif22, Apitd1, Topbp1, Rad51ap1, Ssrp1, Fancd2, Alkbh1, Gen1, Apex1, Rad51, Uhrf1 |
| GO:0006297: nucleotide-excision repair, DNA gap filling            | 6(314)                 | 3,96E-07                 | Pole2, Lig1, Rpa2, Rfc5, Pold1, Rfc4                                                                                                                                                                                                                                                                                      |
| GO:0031572: G2/M transition DNA damage checkpoint                  | 5(314)                 | 4,65E-06                 | Plk1, Brca1, Dtl, Chek1, Clspn                                                                                                                                                                                                                                                                                            |
| GO:0010212: response to ionizing radiation                         | 5(314)                 | 0,000163094              | Rfd3, Paxip1, Brca1, Rad54l, Topbp1                                                                                                                                                                                                                                                                                       |
| GO:0009411: response to UV                                         | 5(314)                 | 0,000232741              | Msh6, Casp3, Usp1, Dtl, Tipin                                                                                                                                                                                                                                                                                             |
| GO:0050918: positive chemotaxis                                    | 4(314)                 | 0,000429187              | Scrib, Hmgb2, Fgf7, Alkbh1                                                                                                                                                                                                                                                                                                |
| GO:0006288: base-excision repair, DNA ligation                     | 2(314)                 | 0,00134703               | Hmgb1, Hmgb2                                                                                                                                                                                                                                                                                                              |
| GO:0045739: positive regulation of DNA repair                      | 3(314)                 | 0,00915821               | Sirt1, Brca1, Apex1                                                                                                                                                                                                                                                                                                       |
| GO:000724: double-strand break repair via homologous recombination | 3(314)                 | 0,0141938                | Brca1, Rad54l, Rad51                                                                                                                                                                                                                                                                                                      |
| GO:0043627: response to estrogen stimulus                          | 3(314)                 | 0,0222209                | Brca1, Ash2l, Cd24a                                                                                                                                                                                                                                                                                                       |
| GO:0070301: cellular response to hydrogen peroxide                 | 2(314)                 | 0,0234741                | Fxn, Apex1                                                                                                                                                                                                                                                                                                                |
| GO:0006298: mismatch repair                                        | 2(314)                 | 0,0308515                | Msh6, Exo1                                                                                                                                                                                                                                                                                                                |
| GO:0048545: response to steroid hormone stimulus                   | 2(314)                 | 0,0308515                | Hmgb2, Spp1                                                                                                                                                                                                                                                                                                               |
| GO:0006302: double-strand break repair                             | 3(314)                 | 0,0322914                | Brca1, Trip13, Rad54l                                                                                                                                                                                                                                                                                                     |
| GO:0042060: wound healing                                          | 3(314)                 | 0,0370525                | Scrib, Vangl2, Fgf7                                                                                                                                                                                                                                                                                                       |
| GO:0050831: male-specific defense response to bacterium            | 1(314)                 | 0,038985                 | Hmgb1                                                                                                                                                                                                                                                                                                                     |
| GO:0006282: regulation of DNA repair                               | 1(314)                 | 0,038985                 | Usp1                                                                                                                                                                                                                                                                                                                      |
| GO:0070370: cellular heat acclimation                              | 1(314)                 | 0,038985                 | Rbbp7                                                                                                                                                                                                                                                                                                                     |
| GO:0000077: DNA damage checkpoint                                  | 2(314)                 | 0,0441243                | Chek1, Tipin                                                                                                                                                                                                                                                                                                              |

#### CYTOSKELETON-REGULATED PROCESSES

|                                                              |         |             |                                                                                                     |
|--------------------------------------------------------------|---------|-------------|-----------------------------------------------------------------------------------------------------|
| GO:0016568: chromatin modification                           | 15(314) | 4,81E-08    | Whsc1, Dnmt1, Rbbp7, Ctf, Ash2l, Rbbp4, Gsg2, Asf1b, Asxl1, Usp3, Hat1, Actl6a, Ezh2, Rbl1, Smarcc1 |
| GO:0030261: chromosome condensation                          | 4(314)  | 0,000230568 | Ncaph, Ncapd2, Ncapd3, Top2a                                                                        |
| GO:0007018: microtubule-based movement                       | 6(314)  | 0,000627124 | Kif4, Kif11, Kif20a, Kif2c, Cenpe, Kif22                                                            |
| GO:0006334: nucleosome assembly                              | 5(314)  | 0,00140607  | H2afv, Asf1b, Cenpa, Mcm2, H2afz                                                                    |
| GO:0051382: kinetochore assembly                             | 2(314)  | 0,00337246  | Cenpa, Pogz                                                                                         |
| GO:0006999: nuclear pore organization                        | 2(314)  | 0,00337246  | Pom121, Nup133                                                                                      |
| GO:0006338: chromatin remodeling                             | 4(314)  | 0,00475204  | Rbbp7, Rbbp4, Actl6a, Smarcc1                                                                       |
| GO:0051262: protein tetramerization                          | 3(314)  | 0,00784636  | Cpsf6, Adsl, Nudt21                                                                                 |
| GO:0051276: chromosome organization                          | 3(314)  | 0,00806018  | Rad54l, Pttg1, Cdca8                                                                                |
| GO:0007019: microtubule depolymerization                     | 2(314)  | 0,0105499   | Kif2c, Stmn1                                                                                        |
| GO:0031532: actin cytoskeleton reorganization                | 3(314)  | 0,0131104   | Hmgb1, Fgf7, Eps8                                                                                   |
| GO:0000245: spliceosome assembly                             | 2(314)  | 0,0202844   | Prpf19, Zrsr2                                                                                       |
| GO:0033108: mitochondrial respiratory chain complex assembly | 1(314)  | 0,038985    | Tfam                                                                                                |
| GO:0043486: histone exchange                                 | 1(314)  | 0,038985    | Nasp                                                                                                |
| GO:0030866: cortical actin cytoskeleton organization         | 2(314)  | 0,0395876   | Llg1, Arf6                                                                                          |

#### CELL PROLIFERATION AND GROWTH

| <i>Functional Category</i>                                                            | <i>Number of Genes</i> | <i>Corrected p-value</i> | <i>Genes repressed in Table S4</i>                                                                               |
|---------------------------------------------------------------------------------------|------------------------|--------------------------|------------------------------------------------------------------------------------------------------------------|
| <b>GO:0008283: cell proliferation</b>                                                 | 9(314)                 | 0,000185875              | Prkar2b, Kat2a, Mki67, Scrib, Nasp, Ptges3, Mcm7, Tacc3, Uhrf1                                                   |
| <b>GO:0008284: positive regulation of cell proliferation</b>                          | 11(314)                | 0,00202872               | Cdca7l, Fxn, Ash2l, Zfp703, Recql4, Hmgb1, Cdc7, Fgf7, Cdc20, Tipin, Mycn                                        |
| <b>GO:0033601: positive regulation of mammary gland epithelial cell proliferation</b> | 2(314)                 | 0,00797998               | lqgap3, Zfp703                                                                                                   |
| <b>GO:0001833: inner cell mass cell proliferation</b>                                 | 2(314)                 | 0,0308515                | Prpf19, Gins1                                                                                                    |
| <b>GO:0030889: negative regulation of B cell proliferation</b>                        | 2(314)                 | 0,0308515                | Casp3, Cd24a                                                                                                     |
| <b>GO:0046014: negative regulation of T cell homeostatic proliferation</b>            | 1(314)                 | 0,038985                 | Cd24a                                                                                                            |
| <b>GO:0042103: positive regulation of T cell homeostatic proliferation</b>            | 1(314)                 | 0,038985                 | Cd24a                                                                                                            |
| <b>TRANSPORT (METABOLITES, IONS AND VESICLES)</b>                                     |                        |                          |                                                                                                                  |
| <b>GO:0051028: mRNA transport</b>                                                     | 6(314)                 | 0,000376719              | Nup54, Pom121, Nup107, Slbp, Nup133, Nup43                                                                       |
| <b>GO:0048488: synaptic vesicle endocytosis</b>                                       | 2(314)                 | 0,0234741                | Scrib, Cd24a                                                                                                     |
| <b>GO:0032597: B cell receptor transport into membrane raft</b>                       | 1(314)                 | 0,038985                 | Cd24a                                                                                                            |
| <b>GO:0032600: chemokine receptor transport out of membrane raft</b>                  | 1(314)                 | 0,038985                 | Cd24a                                                                                                            |
| <b>GO:0046831: regulation of RNA export from nucleus</b>                              | 1(314)                 | 0,038985                 | Khdrbs1                                                                                                          |
| <b>GO:0015031: protein transport</b>                                                  | 10(314)                | 0,0447186                | Nup54, Pom121, Kif20a, Nasp, Nup107, Kpnb1, Cenpf, Nup133, Nup43, Arf6                                           |
| <b>DEVELOPMENTAL PROCESS</b>                                                          |                        |                          |                                                                                                                  |
| <b>GO:0001843: neural tube closure</b>                                                | 5(314)                 | 0,00195095               | Kat2a, Scrib, Vangl2, Tead2, Stil                                                                                |
| <b>GO:0003149: membranous septum morphogenesis</b>                                    | 2(314)                 | 0,00797998               | Whsc1, Vangl2                                                                                                    |
| <b>GO:0045665: negative regulation of neuron differentiation</b>                      | 4(314)                 | 0,00995345               | Prpf19, Aspm, Cit, Cd24a                                                                                         |
| <b>GO:0048538: thymus development</b>                                                 | 3(314)                 | 0,0131104                | Ccnb2, Six4, Bcl2l11                                                                                             |
| <b>GO:0007399: nervous system development</b>                                         | 8(314)                 | 0,015502                 | Kat2a, Nrp1, Cit, Hmgb1, Hmgb2, Actl6a, Stmn1, Smarcc1                                                           |
| <b>GO:0016446: somatic hypermutation of immunoglobulin genes</b>                      | 2(314)                 | 0,0163194                | Msh6, Exo1                                                                                                       |
| <b>GO:0048699: generation of neurons</b>                                              | 2(314)                 | 0,0163194                | Cit, Six4                                                                                                        |
| <b>GO:0001701: in utero embryonic development</b>                                     | 7(314)                 | 0,0228412                | Kat2a, Sin3a, Ccnb2, Pcmt, Alkbh1, Stil, Bcl2l11                                                                 |
| <b>GO:0048339: paraxial mesoderm development</b>                                      | 2(314)                 | 0,0234741                | Tead2, Nup133                                                                                                    |
| <b>GO:0030903: notochord development</b>                                              | 2(314)                 | 0,0234741                | Tead2, Stil                                                                                                      |
| <b>GO:0007275: multicellular organismal development</b>                               | 16(314)                | 0,027824                 | Timeless, Sirt1, Spred2, Zfp57, Nrp1, Cit, Six4, Scrib, Vangl2, Plxnb1, Cenpe, H2afz, Stmn1, Fancd2, Stil, Uhrf1 |
| <b>GO:0008584: male gonad development</b>                                             | 3(314)                 | 0,0325403                | Hmgb2, Patz1, Bcl2l11                                                                                            |
| <b>GO:0060998: regulation of dendritic spine development</b>                          | 1(314)                 | 0,038985                 | Arf6                                                                                                             |
| <b>GO:0051154: negative regulation of striated muscle cell differentiation</b>        | 1(314)                 | 0,038985                 | Ezh2                                                                                                             |
| <b>GO:0045605: negative regulation of epidermal cell differentiation</b>              | 1(314)                 | 0,038985                 | Ezh2                                                                                                             |
| <b>GO:0035148: tube formation</b>                                                     | 1(314)                 | 0,038985                 | Bcl2l11                                                                                                          |
| <b>GO:0003402: planar cell polarity pathway involved in axis elongation</b>           | 1(314)                 | 0,038985                 | Vangl2                                                                                                           |
| <b>GO:0060420: regulation of heart growth</b>                                         | 1(314)                 | 0,038985                 | Dusp6                                                                                                            |
| <b>GO:0060717: chorion development</b>                                                | 1(314)                 | 0,038985                 | Paxip1                                                                                                           |
| <b>GO:0003290: atrial septum secundum morphogenesis</b>                               | 1(314)                 | 0,038985                 | Whsc1                                                                                                            |
| <b>GO:0003289: atrial septum primum</b>                                               | 1(314)                 | 0,038985                 | Whsc1                                                                                                            |



| <i>Functional Category</i>                                                                      | <i>Number of Genes</i> | <i>Corrected p-value</i> | <i>Genes repressed in Table S4</i>                                                                 |
|-------------------------------------------------------------------------------------------------|------------------------|--------------------------|----------------------------------------------------------------------------------------------------|
| <b>morphogenesis</b>                                                                            |                        |                          |                                                                                                    |
| <b>GO:0030324: lung development</b>                                                             | 4(314)                 | 0,039477                 | Timeless, Hmgb1, Fgf7, Mycn                                                                        |
| <b>CELL DEATH</b>                                                                               |                        |                          |                                                                                                    |
| <b>GO:0008630: DNA damage response, signal transduction resulting in induction of apoptosis</b> | 3(314)                 | 0,00383482               | Msh6, Brca1, Mbd4                                                                                  |
| <b>GO:0006915: apoptosis</b>                                                                    | 13(314)                | 0,00780888               | Sirt1, Bub1, Casp3, Tmem173, Ect2, Rad21, Gramd4, Casp2, Pcna, Bub1b, Bcl2l11, Arf6, 1810011010Rik |
| <b>GO:0008624: induction of apoptosis by extracellular signals</b>                              | 5(314)                 | 0,00971646               | Casp3, Ect2, Casp2, Cd24a, Bcl2l11                                                                 |
| <b>GO:0043065: positive regulation of apoptosis</b>                                             | 7(314)                 | 0,0152979                | Casp3, Casp2, Scrib, Dusp6, Hmgb1, Top2a, Bcl2l11                                                  |
| <b>GO:0043525: positive regulation of neuron apoptosis</b>                                      | 3(314)                 | 0,0280321                | Casp3, Casp2, Bcl2l11                                                                              |
| <b>GO:0010942: positive regulation of cell death</b>                                            | 2(314)                 | 0,0447025                | Hmgb1, Mycn                                                                                        |
| <b>GO:0043066: negative regulation of apoptosis</b>                                             | 7(314)                 | 0,0449741                | Mad2l1, Fxn, Casp3, Sin3a, Casp2, Stil, Fignl1                                                     |
| <b>SIGNALING</b>                                                                                |                        |                          |                                                                                                    |
| <b>GO:0070373: negative regulation of ERK1 and ERK2 cascade</b>                                 | 2(314)                 | 0,0395876                | Vrk3, Dusp6                                                                                        |
| <b>GO:0000188: inactivation of MAPK activity</b>                                                | 2(314)                 | 0,0447025                | Spred2, Dusp6                                                                                      |
| <b>OTHER</b>                                                                                    |                        |                          |                                                                                                    |
| <b>GO:0034501: protein localization to kinetochore</b>                                          | 3(314)                 | 0,000309679              | Aurkb, Ccdc99, Bub1b                                                                               |
| <b>GO:0043029: T cell homeostasis</b>                                                           | 3(314)                 | 0,00577017               | Casp3, Ccnb2, Bcl2l11                                                                              |
| <b>GO:0071168: protein localization to chromatin</b>                                            | 2(314)                 | 0,00337246               | Plk1, Rad21                                                                                        |
| <b>GO:0045190: isotype switching</b>                                                            | 2(314)                 | 0,0308515                | Msh6, Exo1                                                                                         |
| <b>GO:0045830: positive regulation of isotype switching</b>                                     | 1(314)                 | 0,038985                 | Paxip1                                                                                             |
| <b>GO:0001309: age-dependent telomere shortening</b>                                            | 1(314)                 | 0,038985                 | Terf1                                                                                              |
| <b>GO:0032913: negative regulation of transforming growth factor-beta3 production</b>           | 1(314)                 | 0,038985                 | Cd24a                                                                                              |
| <b>GO:0034107: negative regulation of erythrocyte clearance</b>                                 | 1(314)                 | 0,038985                 | Cd24a                                                                                              |
| <b>GO:0034119: negative regulation of erythrocyte aggregation</b>                               | 1(314)                 | 0,038985                 | Cd24a                                                                                              |
| <b>GO:2000145: regulation of cell motility</b>                                                  | 1(314)                 | 0,038985                 | Brca1                                                                                              |
| <b>GO:0033003: regulation of mast cell activation</b>                                           | 1(314)                 | 0,038985                 | Ptpre                                                                                              |
| <b>GO:0035090: maintenance of apical/basal cell polarity</b>                                    | 1(314)                 | 0,038985                 | Llg1                                                                                               |
| <b>GO:0001782: B cell homeostasis</b>                                                           | 2(314)                 | 0,0441243                | Casp3, Bcl2l11                                                                                     |

**S5B. Functional annotation of induced genes from Rasless MEFs that are repressed in both BRAF- and MEK1-rescued MEFs**

| <i>Functional Category</i>                                                | <i>Number of Genes</i> | <i>Corrected p-value</i> | <i>Genes upregulated in Table S4</i>                                                                                                |
|---------------------------------------------------------------------------|------------------------|--------------------------|-------------------------------------------------------------------------------------------------------------------------------------|
| <b>TRANSPORT (METABOLITES, IONS AND VESICLES)</b>                         |                        |                          |                                                                                                                                     |
| GO:0006810: transport                                                     | 17(86)                 | 4,83E-05                 | Slc6a6, Tmco3, Slc31a2, Stx8, Ap3m2, Kpna1, Slc9a6, Exoc3, Dynlt3, Rab2b, Slc26a11, Slco3a1, Rab7l1, Slc1a4, Vamp3, Atp6v0a1, Vps29 |
| GO:0016192: vesicle-mediated transport                                    | 5(86)                  | 0,00443869               | Stx8, Ap3m2, Rab2b, Vamp3, Stx7                                                                                                     |
| GO:0015031: protein transport                                             | 7(86)                  | 0,00900847               | Ap3m2, Kpna1, Exoc3, Rab2b, Rab7l1, Vamp3, Vps29                                                                                    |
| GO:0006906: vesicle fusion                                                | 2(86)                  | 0,0136743                | Stx8, Stx7                                                                                                                          |
| GO:0006896: Golgi to vacuole transport                                    | 1(86)                  | 0,0202459                | Vps29                                                                                                                               |
| GO:0034589: hydroxyproline transport                                      | 1(86)                  | 0,0202459                | Slc1a4                                                                                                                              |
| GO:0015826: threonine transport                                           | 1(86)                  | 0,0202459                | Slc1a4                                                                                                                              |
| GO:0001762: beta-alanine transport                                        | 1(86)                  | 0,0202459                | Slc6a6                                                                                                                              |
| GO:0015734: taurine transport                                             | 1(86)                  | 0,0202459                | Slc6a6                                                                                                                              |
| GO:0008333: endosome to lysosome transport                                | 2(86)                  | 0,0309299                | Stx8, Stx7                                                                                                                          |
| GO:0015811: L-cystine transport                                           | 1(86)                  | 0,0312005                | Slc1a4                                                                                                                              |
| GO:0006811: ion transport                                                 | 6(86)                  | 0,0346205                | Tmco3, Slc31a2, Slc9a6, Slc26a11, Slco3a1, Atp6v0a1                                                                                 |
| GO:0015732: prostaglandin transport                                       | 1(86)                  | 0,0355682                | Slco3a1                                                                                                                             |
| GO:0015825: L-serine transport                                            | 1(86)                  | 0,0355682                | Slc1a4                                                                                                                              |
| GO:0006886: intracellular protein transport                               | 3(86)                  | 0,0360536                | Ap3m2, Kpna1, Stx7                                                                                                                  |
| GO:0003333: amino acid transmembrane transport                            | 2(86)                  | 0,0365263                | Slc6a6, Slc1a4                                                                                                                      |
| GO:0006865: amino acid transport                                          | 2(86)                  | 0,0368832                | Slc6a6, Slc1a4                                                                                                                      |
| GO:0015808: L-alanine transport                                           | 1(86)                  | 0,0403518                | Slc1a4                                                                                                                              |
| GO:0035524: proline transmembrane transport                               | 1(86)                  | 0,0453434                | Slc1a4                                                                                                                              |
| GO:0035434: copper ion transmembrane transport                            | 1(86)                  | 0,0453434                | Slc31a2                                                                                                                             |
| GO:0015824: proline transport                                             | 1(86)                  | 0,0486711                | Slc1a4                                                                                                                              |
| <b>METABOLITE PROCESSING (PROTEIN, CARBOHYDRATE AND LIPID PROCESSING)</b> |                        |                          |                                                                                                                                     |
| GO:0006657: CDP-choline pathway                                           | 2(86)                  | 0,00377501               | Pcyt1a, Chpt1                                                                                                                       |
| GO:0008654: phospholipid biosynthetic process                             | 3(86)                  | 0,0110616                | Pcyt1a, Abhd5, Chpt1                                                                                                                |
| GO:0006656: phosphatidylcholine biosynthetic process                      | 2(86)                  | 0,012102                 | Pcyt1a, Chpt1                                                                                                                       |
| GO:0043438: acetoacetic acid metabolic process                            | 1(86)                  | 0,0202459                | Tyrrp1                                                                                                                              |
| GO:0070178: D-serine metabolic process                                    | 1(86)                  | 0,0202459                | Srr                                                                                                                                 |
| GO:0070179: D-serine biosynthetic process                                 | 1(86)                  | 0,0202459                | Srr                                                                                                                                 |
| GO:0009069: serine family amino acid metabolic process                    | 1(86)                  | 0,0202459                | Srr                                                                                                                                 |
| GO:0006583: melanin biosynthetic process from tyrosine                    | 1(86)                  | 0,0312005                | Tyrrp1                                                                                                                              |
| GO:0015939: pantothenate metabolic process                                | 1(86)                  | 0,0312005                | Vnn1                                                                                                                                |
| GO:0045964: positive regulation of dopamine metabolic process             | 1(86)                  | 0,0312005                | Maob                                                                                                                                |
| GO:0001933: negative regulation of protein phosphorylation                | 2(86)                  | 0,0327589                | Prnp, Impact                                                                                                                        |



| <i>Functional Category</i>                                                                                                     | <i>Number of Genes</i> | <i>Corrected p-value</i> | <i>Genes upregulated in Table S4</i> |
|--------------------------------------------------------------------------------------------------------------------------------|------------------------|--------------------------|--------------------------------------|
| GO:0006695: cholesterol biosynthetic process                                                                                   | 2(86)                  | 0,0329598                | Insig2, Cyb5r3                       |
| GO:0016126: sterol biosynthetic process                                                                                        | 2(86)                  | 0,0329598                | Insig2, Cyb5r3                       |
| GO:0006663: platelet activating factor biosynthetic process                                                                    | 1(86)                  | 0,0355682                | Chpt1                                |
| GO:0046068: cGMP metabolic process                                                                                             | 1(86)                  | 0,0355682                | Rora                                 |
| GO:0006582: melanin metabolic process                                                                                          | 1(86)                  | 0,0355682                | Tyrp1                                |
| GO:0051084: 'de novo' posttranslational protein folding                                                                        | 1(86)                  | 0,0355682                | Entpd5                               |
| GO:0010894: negative regulation of steroid biosynthetic process                                                                | 1(86)                  | 0,0403518                | Insig2                               |
| GO:0071569: protein ufmylation                                                                                                 | 1(86)                  | 0,0403518                | Ufm1                                 |
| GO:0006563: L-serine metabolic process                                                                                         | 1(86)                  | 0,0453434                | Srr                                  |
| GO:0042866: pyruvate biosynthetic process                                                                                      | 1(86)                  | 0,0453434                | Srr                                  |
| GO:0006654: phosphatidic acid biosynthetic process                                                                             | 1(86)                  | 0,0486711                | Abhd5                                |
| GO:0050435: beta-amyloid metabolic process                                                                                     | 1(86)                  | 0,0486711                | Bace1                                |
| GO:0010898: positive regulation of triglyceride catabolic process                                                              | 1(86)                  | 0,0486711                | Abhd5                                |
| <b>CELL DEATH</b>                                                                                                              |                        |                          |                                      |
| GO:0006916: anti-apoptosis                                                                                                     | 4(86)                  | 0,0130928                | Birc7, Prnp, Vnn1, Tsc22d3           |
| GO:0048102: autophagic cell death                                                                                              | 1(86)                  | 0,0403518                | Acp2                                 |
| <b>CYTOSKELETON-REGULATED PROCESSES</b>                                                                                        |                        |                          |                                      |
| GO:0016584: nucleosome positioning                                                                                             | 1(86)                  | 0,0486711                | Hist1h1e                             |
| GO:0045103: intermediate filament-based process                                                                                | 1(86)                  | 0,0355682                | Sync                                 |
| <b>DEVELOPMENTAL PROCESS</b>                                                                                                   |                        |                          |                                      |
| GO:0060668: regulation of branching involved in salivary gland morphogenesis by extracellular matrix-epithelial cell signaling | 1(86)                  | 0,0202459                | Ntn4                                 |
| GO:0010842: retina layer formation                                                                                             | 1(86)                  | 0,0355682                | Ptpm                                 |
| GO:0048642: negative regulation of skeletal muscle tissue development                                                          | 1(86)                  | 0,0355682                | Tsc22d3                              |
| GO:0060363: cranial suture morphogenesis                                                                                       | 1(86)                  | 0,0453434                | Insig2                               |
| GO:0035117: embryonic arm morphogenesis                                                                                        | 1(86)                  | 0,0453434                | Wnt9a                                |
| <b>SIGNALING</b>                                                                                                               |                        |                          |                                      |
| GO:0070885: negative regulation of calcineurin-NFAT signaling pathway                                                          | 1(86)                  | 0,0202459                | Prnp                                 |
| GO:0014066: regulation of phosphatidylinositol 3-kinase cascade                                                                | 1(86)                  | 0,0312005                | Entpd5                               |
| GO:0007264: small GTPase mediated signal transduction                                                                          | 4(86)                  | 0,033574                 | Ras12, Rab2b, Rab711, Rit1           |
| GO:0014063: negative regulation of serotonin secretion                                                                         | 1(86)                  | 0,0355682                | Maob                                 |
| GO:0001921: positive regulation of                                                                                             | 1(86)                  | 0,0486711                | Vamp3                                |

| <i>Functional Category</i>                                               | <i>Number of Genes</i> | <i>Corrected p-value</i> | <i>Genes upregulated in Table S4</i> |
|--------------------------------------------------------------------------|------------------------|--------------------------|--------------------------------------|
| receptor recycling                                                       |                        |                          |                                      |
| <b><u>CELL PROLIFERATION AND GROWTH</u></b>                              |                        |                          |                                      |
| <b>GO:0046007: negative regulation of activated T cell proliferation</b> | 1(86)                  | 0,0403518                | Prnp                                 |
| <b><u>OTHER</u></b>                                                      |                        |                          |                                      |
| <b>GO:0002544: chronic inflammatory response</b>                         | 1(86)                  | 0,0202459                | Vnn1                                 |
| <b>GO:0009628: response to abiotic stimulus</b>                          | 1(86)                  | 0,0202459                | Pcyt1a                               |
| <b>GO:0030967: ER-nuclear sterol response pathway</b>                    | 1(86)                  | 0,0312005                | Insig2                               |
| <b>GO:0006991: response to sterol depletion</b>                          | 1(86)                  | 0,0312005                | Insig2                               |
| <b>GO:0043030: regulation of macrophage activation</b>                   | 1(86)                  | 0,0403518                | Rora                                 |
| <b>GO:0010891: negative regulation of sequestering of triglyceride</b>   | 1(86)                  | 0,0403518                | Abhd5                                |
| <b>GO:0002526: acute inflammatory response</b>                           | 1(86)                  | 0,0486711                | Vnn1                                 |
