# Supplementary material for: Reversible, interrelated mRNA and miRNA expression patterns in the transcriptome of Rasless fibroblasts: functional and mechanistic implications
Source: PubMed Central journal article supplement (PMC4007593; doi:10.1186/1471-2164-14-731), 2013-10-25

**A**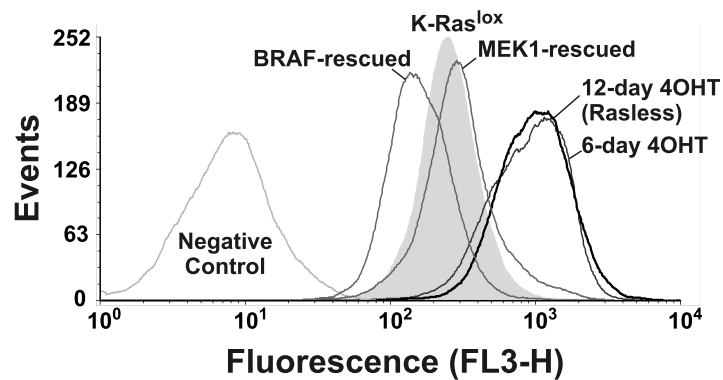**B**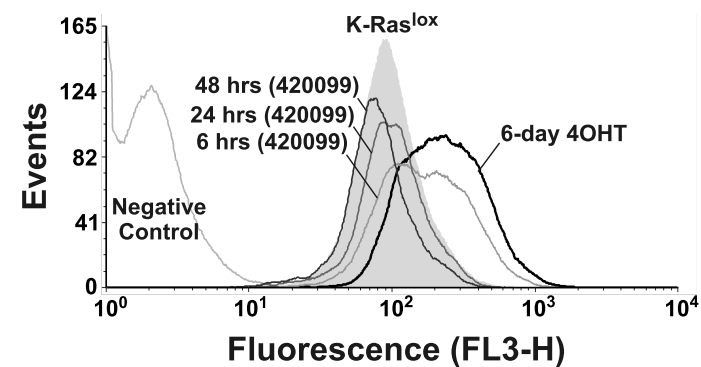**C**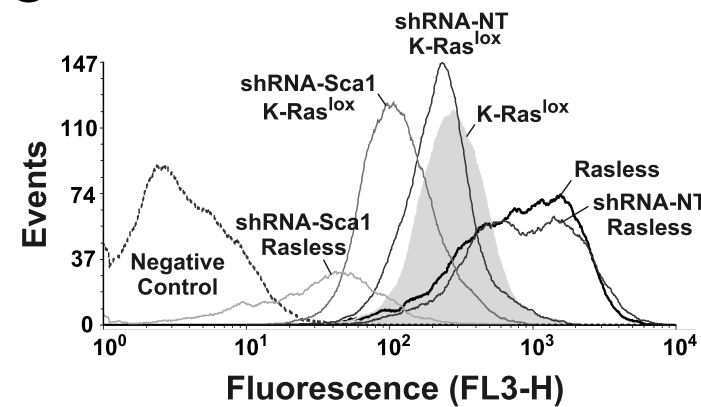**D**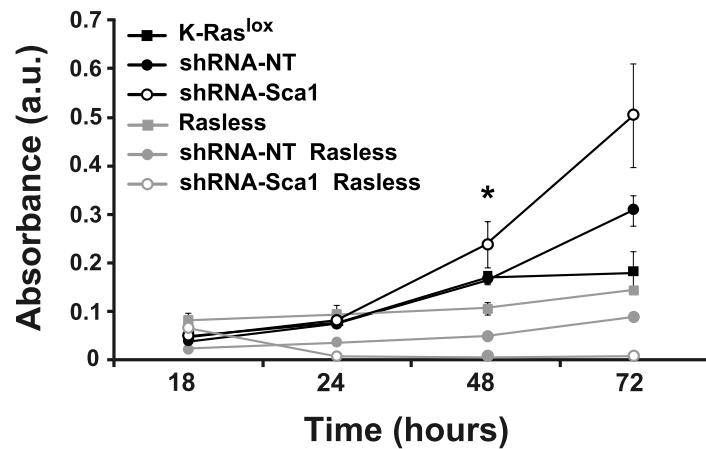**E**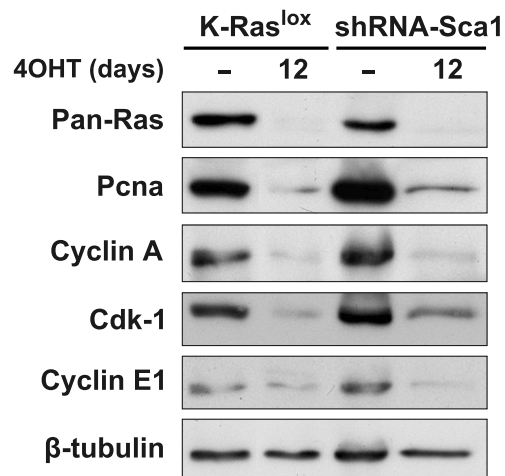

Supplement: 1471-2164-14-731-S6.pdf [file 1471-2164-14-731-S6.pdf]
