# Supplementary material for: Reversible, interrelated mRNA and miRNA expression patterns in the transcriptome of Rasless fibroblasts: functional and mechanistic implications
Source: PubMed Central journal article supplement (PMC4007593; doi:10.1186/1471-2164-14-731), 2013-10-25

**A**Rasless, induced  
FDR=0.01

shRB-rescued, repressed

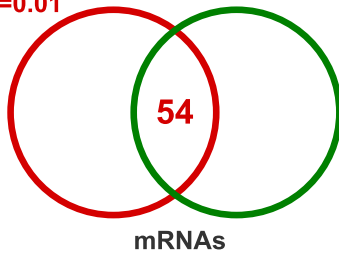Rasless, repressed  
FDR=0.01

shRB-rescued, induced

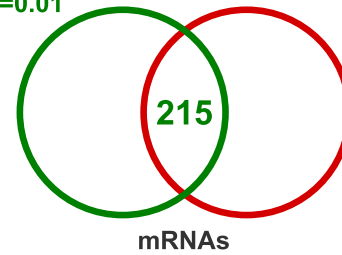**Biological Process (GO)**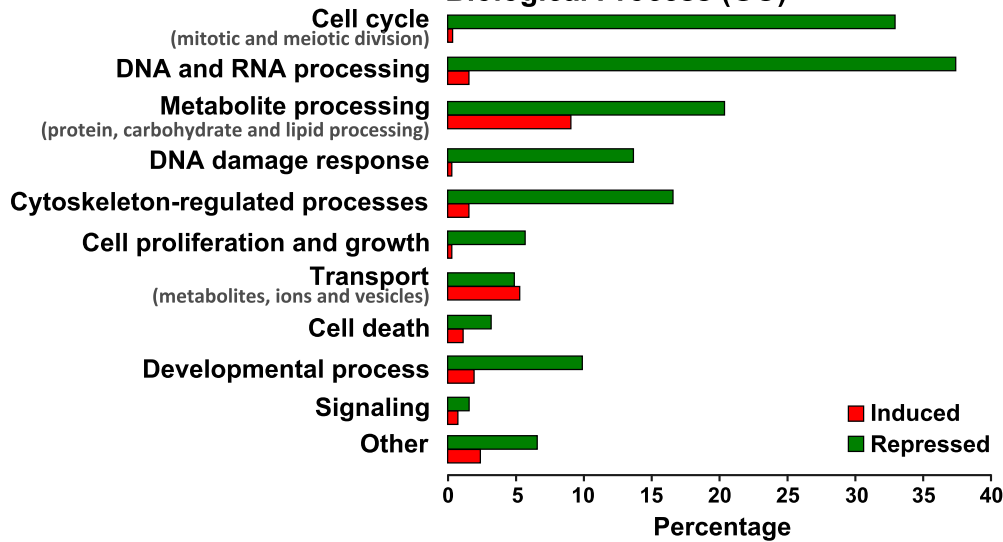**B**Rasless, induced  
FDR=0.1

shRB-rescued, repressed

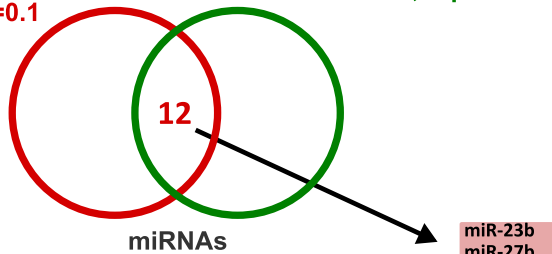Rasless, repressed  
FDR=0.1

shRB-rescued, induced

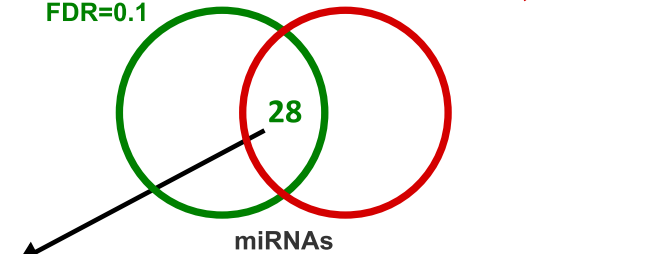

miR-23b  
miR-27b  
miR-10b  
miR-129-3p  
miR-185  
miR-335-5p  
miR-365  
miR-376a  
miR-487b  
miR-411  
miR-706  
miR-719

miR-106a  
miR-20b  
miR-17  
miR-17\*  
miR-18a  
miR-20a  
miR-92a  
miR-106b  
miR-93  
miR-25  
miR-100  
miR-125b-3p  
miR-130b  
miR-155  
miR-182  
miR-183  
miR-207  
miR-221  
miR-222  
miR-29a  
miR-296-3p  
miR-320  
miR-466f-3p  
miR-466j  
miR-493  
miR-672  
miR-877  
miR-1196

**Biological Process (GO)**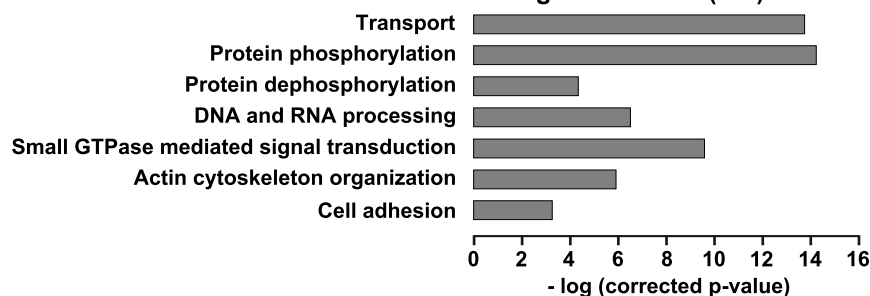

Supplement: 1471-2164-14-731-S7.pdf [file 1471-2164-14-731-S7.pdf]
